# Supplementary material for: Mu Transposon Insertion Sites and Meiotic Recombination Events Co-Localize with Epigenetic Marks for Open Chromatin across the Maize Genome
Source: PLoS Genet. 2009 Nov 20;5(11):e1000733. doi: 10.1371/journal.pgen.1000733 (PMC2774946; doi:10.1371/journal.pgen.1000733)
Supplement: Table S4 — 10,143 genetic markers in the integrated map. (9.95 MB XLS) [file pgen.1000733.s012.xls]

## Sheet: Table S3 - Integrated Map
Table S4. 10,143 genetic markers in the integrated map
Row #	Marker Name	Type	Skeleton of Muscle Marker	Genetic Chromosome	Genetic Pos (cM)	Mu Distance to sk (cM)	Marker Type	Polymorphism	Marker Source	Mapping Scores	ID of related sequences	IDs of physically mapped sequences	Physical Chromosome	Physical Pos (bp)	Mapping Consistency
1	IDP8701	sk	-	chr01	0	0	Dominant	+/-	ISU Map7	1,2,2,2,2,2,1,2,0,2,1,2,2,1,1,1,1,0,0,2,2,2,2,1,1,1,1,1,1,1,2,1,1,1,0,0,1,2,0,1,2,1,2,2,1,2,1,1,2,2,2,1,2,2,2,2,1,0,0,2,1,1,2,0,2,2,1,1,0,1,2,2,2,1,2,2,0,2,1,1,1,0,1,2,1,1,2,2,1,1,1,2,1,1,2,1,2,1,1,1,1,1,0,1,1,2,2,2,2,0,2,2,1,1,1,1,2,2,0,1,2,1,1,2,0,0,2,2,2,2,2,2,0,2,0,1,2,1,1,0,1,1,2,2,1,1,1,1,1,1,1,0,1,1,2,2,2,0,0,0,2,1,0,2,1,1,1,1,1,0,0,0,1,0,1,2,1,0,1,1,1,1,1,1,2,2,2,2,0,1,2,1,1,2,2,2,2,2,1,2…	MAGIv3.1_104443	MAGIv3.1_104443	chr01	3013480	Consistent
2	IDP4008	mu	IDP8701	chr01	0	1.4	Co-Dominant	Size	ISU Map7	1,2,0,2,2,2,1,2,0,2,1,2,2,1,1,1,1,0,0,1,2,2,2,1,1,1,1,1,1,1,2,1,1,1,0,0,1,2,0,0,2,1,2,2,1,2,1,1,2,2,2,1,2,2,2,2,1,0,0,2,1,1,2,0,2,2,1,1,0,1,2,2,1,1,2,1,0,2,2,1,1,0,1,2,1,1,2,2,1,1,1,2,1,1,2,1,2,1,1,1,1,1,0,1,1,0,2,1,2,0,1,2,1,1,1,0,1,2,0,1,2,1,1,2,0,0,2,2,2,2,2,2,0,2,0,1,2,1,1,0,1,1,2,2,1,1,1,1,1,1,1,0,1,1,2,2,2,0,0,0,2,1,0,2,1,1,1,1,1,0,0,0,1,0,1,2,1,0,1,1,1,1,2,1,2,2,1,1,0,2,1,1,1,2,2,2,2,2,1,2…	MAGIv2.31_76421	MAGIv2.31_76421	chr01	2930292	Consistent
3	umc1177	mu	IDP8701	chr01	0	1.8	-	-	MMP	1,0,1,0,2,0,1,2,2,2,1,2,2,1,1,1,1,2,1,1,2,0,2,1,1,1,1,1,0,1,2,1,1,1,2,1,1,2,2,2,2,1,2,2,1,2,1,1,0,2,2,1,2,2,2,2,1,1,1,0,0,1,2,2,0,0,1,0,1,1,2,2,0,1,2,1,2,2,0,1,1,1,1,2,1,1,2,2,1,1,1,2,0,1,2,0,0,2,2,0,1,1,2,1,1,1,2,0,2,2,0,2,0,1,1,1,1,2,0,1,2,1,1,2,0,1,0,2,2,2,0,2,1,2,1,0,2,1,1,2,1,0,2,2,1,1,0,1,1,0,1,1,1,0,2,2,2,1,2,2,0,0,0,0,0,1,0,1,1,1,2,2,1,1,1,2,1,0,1,1,1,1,2,1,2,2,2,2,2,0,1,1,1,2,2,2,0,2,1,2…	CC749714,CC749715,AY108705,AC186330,CC741125,AI001344	AY108705,AI001344	chr01	2973409	Consistent
4	gnp_AI939829b	mu	IDP8701	chr01	0	1.3	-	-	Genoplante Map	1,0,0,0,2,0,1,2,0,2,0,2,0,1,1,1,0,0,0,1,2,2,2,0,0,1,1,1,1,1,0,1,0,1,0,0,1,0,0,0,0,0,2,2,0,0,1,1,0,2,2,0,0,0,0,2,0,0,0,0,0,2,2,0,0,0,0,0,1,1,0,2,0,0,0,0,0,0,0,0,0,0,0,0,0,0,0,0,0,0,0,0,0,0,0,0,0,0,0,0,0,0,0,0,0,0,0,0,0,0,0,0,0,0,0,0,0,0,0,0,0,0,0,0,0,0,0,0,0,0,0,0,0,0,0,0,0,0,0,0,0,0,0,0,0,0,0,0,0,0,0,0,0,0,0,0,0,0,0,0,0,0,0,0,0,0,0,0,0,0,0,0,0,0,0,0,0,0,0,0,0,0,0,0,0,0,0,0,0,0,0,0,0,0,0,0,0,0,0,0…	AI939829	AI939829	chr04	240187427	Inconsistent
5	IDP762	mu	IDP8701	chr01	0	0.7	Dominant	+/-	ISU Map7	2,2,2,2,2,1,1,2,0,2,1,2,2,1,1,1,1,0,0,1,2,2,2,1,1,1,1,1,1,1,2,1,2,1,0,0,1,2,0,1,2,1,2,2,1,2,1,1,2,2,2,1,2,2,2,2,1,0,0,2,1,2,2,0,2,2,1,1,0,1,2,2,1,1,2,1,0,2,2,1,1,0,1,2,1,1,2,2,1,1,1,2,1,1,2,2,1,1,1,1,1,1,0,1,1,1,2,1,2,0,2,2,1,1,1,1,1,2,0,1,2,1,1,2,0,0,1,2,2,2,2,2,0,2,0,1,2,1,1,0,2,1,2,2,2,1,1,1,1,2,1,0,2,1,2,2,2,0,2,2,2,1,0,2,1,1,1,1,1,0,0,0,1,0,1,2,1,0,1,1,1,2,2,1,2,2,1,2,0,1,1,1,2,2,1,2,2,1,1,1…	MEC_40148_P95-Mar06	MEC_40148_P95-Mar06	chr01	143795	Consistent
6	TIDP6442	mu	IDP8701	chr01	0	0.4	Co-Dominant	TGCE	ISU Map7	2,0,0,0,2,0,1,2,0,2,0,2,0,1,1,1,1,0,0,1,2,2,2,1,0,1,1,1,0,1,2,1,2,1,0,0,1,2,0,0,2,0,2,2,0,2,1,1,0,2,2,0,2,2,0,0,1,0,1,0,0,2,2,0,0,0,0,0,1,0,2,2,0,1,0,0,0,0,0,0,0,0,0,0,0,0,0,0,0,0,0,0,0,0,0,0,0,0,0,0,0,0,0,0,0,0,0,0,0,0,0,0,0,0,0,0,0,0,0,0,0,0,0,0,0,0,0,0,0,0,0,0,0,0,0,0,0,0,0,0,0,0,0,0,0,0,0,0,0,0,0,0,0,0,0,0,0,0,0,0,0,0,0,0,0,0,0,0,0,0,0,0,0,0,0,0,0,0,0,0,0,0,0,0,0,0,0,0,0,0,0,0,0,0,0,0,0,0,0,0…	MAGIv3.1_13013	MAGIv3.1_13013	chr01	130044	Consistent
7	TIDP5829	mu	IDP8701	chr01	0	0.4	Co-Dominant	TGCE	ISU Map7	2,0,0,0,2,0,1,2,0,2,0,2,0,1,1,1,1,0,0,1,2,2,2,1,0,1,1,1,1,1,2,1,1,1,0,0,1,2,0,0,2,0,2,2,0,2,0,1,0,2,2,0,0,2,0,2,1,0,1,0,0,2,2,0,0,0,0,0,1,1,2,2,0,1,0,0,0,0,0,0,0,0,0,0,0,0,0,0,0,0,0,0,0,0,0,0,0,0,0,0,0,0,0,0,0,0,0,0,0,0,0,0,0,0,0,0,0,0,0,0,0,0,0,0,0,0,0,0,0,0,0,0,0,0,0,0,0,0,0,0,0,0,0,0,0,0,0,0,0,0,0,0,0,0,0,0,0,0,0,0,0,0,0,0,0,0,0,0,0,0,0,0,0,0,0,0,0,0,0,0,0,0,0,0,0,0,0,0,0,0,0,0,0,0,0,0,0,0,0,0…	MAGIv3.1_48120	MAGIv3.1_48120	chr01	1732943	Consistent
8	gnp_AI600607	mu	IDP8701	chr01	0	1.3	-	-	Genoplante Map	2,0,0,0,2,0,1,2,0,2,0,2,0,1,1,1,1,0,0,2,2,2,2,1,0,1,1,1,1,1,0,1,0,0,0,0,1,0,0,0,0,0,2,2,0,0,1,1,0,2,2,0,0,0,0,2,1,0,0,0,0,2,0,0,0,0,0,0,1,1,0,2,0,0,0,0,0,0,0,0,0,0,0,0,0,0,0,0,0,0,0,0,0,0,0,0,0,0,0,0,0,0,0,0,0,0,0,0,0,0,0,0,0,0,0,0,0,0,0,0,0,0,0,0,0,0,0,0,0,0,0,0,0,0,0,0,0,0,0,0,0,0,0,0,0,0,0,0,0,0,0,0,0,0,0,0,0,0,0,0,0,0,0,0,0,0,0,0,0,0,0,0,0,0,0,0,0,0,0,0,0,0,0,0,0,0,0,0,0,0,0,0,0,0,0,0,0,0,0,0…	AI600607	AI600607	chr01	983988	Consistent
9	bnlg1124	mu	IDP8701	chr01	0	0	-	-	Genoplante Map	2,0,0,0,2,0,1,2,0,2,0,2,0,1,1,1,1,0,0,0,2,2,2,1,0,1,1,1,1,1,2,1,1,1,0,0,1,2,0,0,2,0,2,2,0,2,1,1,0,2,2,0,2,2,0,2,1,0,1,0,0,2,2,0,0,0,0,0,1,1,1,2,0,1,0,0,0,0,0,0,0,0,0,0,0,0,0,0,0,0,0,0,0,0,0,0,0,0,0,0,0,0,0,0,0,0,0,0,0,0,0,0,0,0,0,0,0,0,0,0,0,0,0,0,0,0,0,0,0,0,0,0,0,0,0,0,0,0,0,0,0,0,0,0,0,0,0,0,0,0,0,0,0,0,0,0,0,0,0,0,0,0,0,0,0,0,0,0,0,0,0,0,0,0,0,0,0,0,0,0,0,0,0,0,0,0,0,0,0,0,0,0,0,0,0,0,0,0,0,0…	CC790991,CC790992	-	-	-	-
10	umc1354	mu	IDP8701	chr01	0	1.2	-	-	MMP	2,0,1,0,2,0,1,2,1,2,2,2,2,1,1,1,0,2,2,2,2,2,2,2,1,2,1,1,1,1,2,1,1,1,0,1,1,2,2,2,2,1,2,2,1,2,1,1,0,2,2,1,2,2,2,2,0,1,1,0,0,2,2,2,0,0,1,0,1,0,1,2,0,1,2,2,2,2,0,2,1,1,1,2,1,1,2,2,1,1,2,2,0,1,2,0,0,1,1,0,1,2,2,1,1,1,2,0,2,2,2,2,0,1,1,1,1,2,2,1,2,1,1,2,2,1,1,2,2,2,0,2,1,2,1,0,2,1,1,1,1,0,2,2,2,1,0,1,1,0,1,1,2,0,2,2,2,1,2,2,0,0,1,2,1,1,0,1,1,1,2,1,1,1,1,2,1,1,1,1,1,1,1,1,2,2,2,2,2,0,1,2,2,2,2,2,0,1,1,1…	AC190658,AI857154,AY106116	AI857154,AY106116	chr01	1862667	Consistent
11	tub1	mu	IDP8701	chr01	0	1.6	-	-	MMP	2,0,0,0,2,0,0,2,1,2,0,2,2,1,1,1,1,2,0,0,2,2,2,1,1,1,1,1,1,1,2,1,1,1,2,1,1,2,2,2,2,1,2,2,1,2,1,1,0,2,2,1,2,2,2,2,1,1,1,0,0,2,2,2,0,0,1,0,1,1,1,2,0,1,2,0,2,2,0,0,1,1,1,2,1,1,2,2,1,1,1,2,0,1,2,0,0,1,1,0,1,0,2,1,1,1,0,0,2,2,0,2,0,1,1,1,1,2,2,1,2,1,1,2,2,2,2,2,2,2,0,2,1,2,1,0,2,1,1,0,1,0,2,2,0,1,0,1,1,0,1,1,1,0,2,2,2,1,2,2,0,0,1,2,1,1,0,1,1,1,2,2,1,1,1,2,1,1,1,1,1,1,1,1,2,2,2,2,2,0,0,0,2,2,0,2,0,1,1,1…	X52879,X52878,AI665233,AY987961,AY110929,CC749438	CC749438	chr01	2179779	Consistent
12	isu110b	mu	IDP8701	chr01	0	2.7	-	-	Genoplante Map	2,0,0,0,2,0,1,2,0,2,0,2,0,1,1,1,1,0,0,2,2,2,2,1,0,1,1,1,1,1,2,1,1,1,0,0,1,2,0,0,2,0,2,2,0,2,1,1,0,2,2,0,2,2,0,2,1,0,1,0,0,2,2,0,0,0,0,0,1,1,1,2,0,1,0,0,0,0,0,0,0,0,0,0,0,0,0,0,0,0,0,0,0,0,0,0,0,0,0,0,0,0,0,0,0,0,0,0,0,0,0,0,0,0,0,0,0,0,0,0,0,0,0,0,0,0,0,0,0,0,0,0,0,0,0,0,0,0,0,0,0,0,0,0,0,0,0,0,0,0,0,0,0,0,0,0,0,0,0,0,0,0,0,0,0,0,0,0,0,0,0,0,0,0,0,0,0,0,0,0,0,0,0,0,0,0,0,0,0,0,0,0,0,0,0,0,0,0,0,0…	-	-	-	-	-
13	gnp_QCN18f08d	mu	IDP8701	chr01	0	0.8	-	-	Genoplante Map	2,0,0,0,2,0,1,2,0,2,0,2,0,1,1,0,1,0,0,2,2,0,2,1,0,1,1,1,1,1,2,1,1,1,0,0,1,0,0,0,0,0,2,2,0,0,1,1,0,2,2,0,0,2,0,2,1,0,0,0,0,2,0,0,0,0,0,0,1,1,0,2,0,0,0,0,0,0,0,0,0,0,0,0,0,0,0,0,0,0,0,0,0,0,0,0,0,0,0,0,0,0,0,0,0,0,0,0,0,0,0,0,0,0,0,0,0,0,0,0,0,0,0,0,0,0,0,0,0,0,0,0,0,0,0,0,0,0,0,0,0,0,0,0,0,0,0,0,0,0,0,0,0,0,0,0,0,0,0,0,0,0,0,0,0,0,0,0,0,0,0,0,0,0,0,0,0,0,0,0,0,0,0,0,0,0,0,0,0,0,0,0,0,0,0,0,0,0,0,0…	CF053582	-	-	-	-
14	TIDP3166	mu	IDP8701	chr01	0	0.4	Co-Dominant	TGCE	ISU Map7	2,0,0,0,2,0,1,2,0,2,0,2,0,1,1,1,1,0,0,0,2,2,2,1,0,1,1,1,1,1,2,1,1,1,0,0,1,2,0,0,2,0,2,2,0,2,1,1,0,2,2,0,2,2,0,2,1,0,1,0,0,2,2,0,0,0,0,0,1,1,1,2,0,1,0,0,0,0,0,0,0,0,0,0,0,0,0,0,0,0,0,0,0,0,0,0,0,0,0,0,0,0,0,0,0,0,0,0,0,0,0,0,0,0,0,0,0,0,0,0,0,0,0,0,0,0,0,0,0,0,0,0,0,0,0,0,0,0,0,0,0,0,0,0,0,0,0,0,0,0,0,0,0,0,0,0,0,0,0,0,0,0,0,0,0,0,0,0,0,0,0,0,0,0,0,0,0,0,0,0,0,0,0,0,0,0,0,0,0,0,0,0,0,0,0,0,0,0,0,0…	MAGIv3.1_91446	MAGIv3.1_91446	chr01	2024184	Consistent
15	phi056	mu	IDP8701	chr01	0	0	-	-	MMP	2,0,1,0,2,0,0,2,1,2,0,2,2,1,1,1,1,2,0,0,2,2,2,1,1,1,1,1,1,1,2,1,1,1,2,1,1,2,2,0,0,0,2,0,1,2,1,1,0,2,2,1,2,2,2,0,1,1,1,0,0,2,2,2,0,0,0,0,1,1,1,2,0,0,2,0,2,2,0,0,1,1,1,0,0,1,2,2,1,1,1,2,0,1,2,0,0,1,1,0,0,0,0,1,1,1,2,0,2,2,0,0,0,1,1,1,1,2,2,1,2,0,1,2,0,0,2,2,2,2,0,2,1,0,0,0,0,1,0,1,1,0,2,2,0,0,0,1,1,0,1,1,1,0,2,2,2,1,2,2,0,1,1,2,0,0,0,1,1,1,2,2,1,1,0,2,1,1,1,1,1,1,1,1,2,2,0,2,2,0,0,0,2,2,2,2,0,1,1,1…	-	-	-	-	-
16	TIDP5514	mu	IDP8701	chr01	0	1.4	Co-Dominant	TGCE	ISU Map7	2,0,0,0,2,0,1,2,0,2,0,2,0,1,1,1,1,0,0,1,2,2,2,1,0,1,1,1,1,1,2,1,1,1,0,0,1,2,0,0,2,0,2,2,0,2,1,1,0,2,2,0,2,2,0,2,1,0,1,0,0,2,2,0,0,0,0,0,1,1,1,2,0,1,0,0,0,0,0,0,0,0,0,0,0,0,0,0,0,0,0,0,0,0,0,0,0,0,0,0,0,0,0,0,0,0,0,0,0,0,0,0,0,0,0,0,0,0,0,0,0,0,0,0,0,0,0,0,0,0,0,0,0,0,0,0,0,0,0,0,0,0,0,0,0,0,0,0,0,0,0,0,0,0,0,0,0,0,0,0,0,0,0,0,0,0,0,0,0,0,0,0,0,0,0,0,0,0,0,0,0,0,0,0,0,0,0,0,0,0,0,0,0,0,0,0,0,0,0,0…	MAGIv4.0_107762	MAGIv4.0_107762	chr01	2420186	Consistent
17	TIDP5564	mu	IDP8701	chr01	0	0	Co-Dominant	TGCE	ISU Map7	2,0,0,0,2,0,1,2,0,2,0,2,0,1,1,1,1,0,0,1,2,2,2,1,0,1,1,1,1,1,2,1,1,1,0,0,1,2,0,0,2,0,2,2,0,2,1,1,0,2,2,0,2,2,0,2,1,0,1,0,0,2,2,0,0,0,0,0,1,1,1,2,0,1,0,0,0,0,0,0,0,0,0,0,0,0,0,0,0,0,0,0,0,0,0,0,0,0,0,0,0,0,0,0,0,0,0,0,0,0,0,0,0,0,0,0,0,0,0,0,0,0,0,0,0,0,0,0,0,0,0,0,0,0,0,0,0,0,0,0,0,0,0,0,0,0,0,0,0,0,0,0,0,0,0,0,0,0,0,0,0,0,0,0,0,0,0,0,0,0,0,0,0,0,0,0,0,0,0,0,0,0,0,0,0,0,0,0,0,0,0,0,0,0,0,0,0,0,0,0…	MAGIv4.0_107762	MAGIv4.0_107762	chr01	2420186	Consistent
18	IDP1700	mu	IDP8701	chr01	0	0.4	Co-Dominant	Size	ISU Map7	2,2,0,2,2,2,1,2,0,2,1,2,2,1,1,1,1,0,0,1,2,2,2,1,1,1,1,1,1,1,2,1,1,1,0,0,1,2,0,0,2,1,2,2,1,2,1,1,2,2,2,1,2,2,2,2,1,0,0,2,1,1,2,0,1,2,1,1,0,1,2,2,1,1,2,1,0,2,2,1,1,0,1,2,1,1,2,2,1,1,1,2,0,1,2,1,2,1,1,1,1,1,0,1,1,1,2,1,2,0,2,2,1,1,1,1,1,2,0,1,2,1,1,2,0,0,2,2,2,2,2,2,0,2,0,1,2,1,1,0,1,1,2,2,1,1,1,2,1,1,1,0,1,1,2,2,2,0,0,0,2,1,0,2,1,1,1,1,1,0,0,0,1,0,1,2,1,0,1,1,1,1,0,1,2,2,1,2,0,1,1,1,2,2,2,2,2,2,1,2…	MEC_83331_P95-Mar06	MEC_83331_P95-Mar06	chr01	2787348	Consistent
19	gnp_QAF33a08a	mu	IDP8701	chr01	0	2	-	-	Genoplante Map	2,0,0,0,2,0,1,2,0,2,0,2,0,1,1,1,1,0,0,1,2,2,2,1,0,1,1,1,1,1,2,1,1,1,0,0,1,0,0,0,0,0,2,2,0,0,0,1,0,2,2,0,0,2,0,2,1,0,0,0,0,1,2,0,0,0,0,0,1,1,0,2,0,0,0,0,0,0,0,0,0,0,0,0,0,0,0,0,0,0,0,0,0,0,0,0,0,0,0,0,0,0,0,0,0,0,0,0,0,0,0,0,0,0,0,0,0,0,0,0,0,0,0,0,0,0,0,0,0,0,0,0,0,0,0,0,0,0,0,0,0,0,0,0,0,0,0,0,0,0,0,0,0,0,0,0,0,0,0,0,0,0,0,0,0,0,0,0,0,0,0,0,0,0,0,0,0,0,0,0,0,0,0,0,0,0,0,0,0,0,0,0,0,0,0,0,0,0,0,0…	CD977680	CD977680	chr01	2783196	Consistent
20	MAGI_101072	mu	IDP8701	chr01	0	1.5	-	SNP	ISU SNP Map	1,2,0,2,2,2,1,2,0,2,2,2,2,1,1,1,1,0,0,2,2,2,2,1,1,1,1,1,1,1,2,1,1,1,0,0,1,2,0,0,2,1,2,2,1,2,1,1,2,2,1,1,2,2,2,2,1,0,0,2,1,1,2,0,2,2,1,0,0,1,2,2,2,2,2,2,0,2,1,2,1,0,1,2,1,1,1,2,1,1,1,2,1,1,2,1,2,1,1,1,1,2,0,1,1,1,2,2,2,0,2,0,1,1,1,1,2,2,0,1,2,1,2,2,0,0,2,2,2,2,2,2,0,2,0,1,2,1,1,0,2,1,2,2,0,1,1,1,1,1,1,0,1,1,2,2,2,0,0,0,2,1,0,2,2,1,1,1,1,0,0,0,1,0,1,2,1,0,1,1,1,1,2,1,2,2,2,2,0,1,2,1,1,2,2,2,2,2,1,2…	MAGIv3.1_101072	MAGIv3.1_101072	chr01	3167344	Consistent
21	umc1566	mu	IDP8701	chr01	0	0.7	-	-	MMP	1,0,1,0,2,0,1,2,2,2,2,2,2,1,1,1,1,2,2,2,2,1,2,1,1,1,1,1,0,1,2,1,1,1,2,1,1,2,2,2,2,1,2,2,1,2,1,1,0,2,1,1,2,2,2,2,1,1,1,0,0,1,2,2,0,0,1,0,1,1,2,2,0,1,2,2,2,2,0,2,1,1,1,0,1,1,1,2,1,1,1,2,0,1,2,0,0,1,1,0,1,2,2,1,1,1,2,0,2,2,2,2,0,1,1,1,2,2,2,1,2,1,2,2,2,1,2,2,2,2,0,2,1,2,2,0,0,1,1,2,2,0,2,2,1,1,0,1,1,0,1,1,1,0,2,2,2,1,2,2,0,1,1,2,2,1,0,1,1,1,2,2,1,1,1,2,1,2,1,1,1,0,0,1,2,2,2,2,2,0,1,2,1,2,2,2,0,2,1,2…	BG268064,CC738903,CC740688,CC738902,CC744444,AW061734,AW066084,CC744443	BG268064,AW061734,AW066084	chr01	3107738	Consistent
22	TIDP5605	mu	IDP8701	chr01	0	0	Co-Dominant	TGCE	ISU Map7	1,0,0,0,2,0,1,2,0,2,0,2,0,1,1,1,1,0,0,0,2,1,2,1,0,1,1,1,0,1,2,1,1,1,0,0,1,2,0,0,2,0,2,2,0,2,1,1,0,2,1,0,2,2,0,2,1,0,1,0,0,1,2,0,0,0,0,0,1,1,2,2,0,1,0,0,0,0,0,0,0,0,0,0,0,0,0,0,0,0,0,0,0,0,0,0,0,0,0,0,0,0,0,0,0,0,0,0,0,0,0,0,0,0,0,0,0,0,0,0,0,0,0,0,0,0,0,0,0,0,0,0,0,0,0,0,0,0,0,0,0,0,0,0,0,0,0,0,0,0,0,0,0,0,0,0,0,0,0,0,0,0,0,0,0,0,0,0,0,0,0,0,0,0,0,0,0,0,0,0,0,0,0,0,0,0,0,0,0,0,0,0,0,0,0,0,0,0,0,0…	MAGIv3.1_12031	MAGIv3.1_12031	chr01	3103461	Consistent
23	TIDP5690	sk	-	chr01	2.6	0	Co-Dominant	TGCE	ISU Map7	1,0,0,0,2,0,1,2,0,2,0,2,0,0,1,1,1,0,0,1,2,2,2,1,0,1,1,1,2,1,2,1,1,1,0,0,1,2,0,0,2,0,2,2,0,2,1,1,0,2,1,0,2,2,0,2,1,0,1,0,0,1,2,0,0,0,0,0,1,1,2,2,0,2,0,0,0,0,0,0,0,0,0,0,0,0,0,0,0,0,0,0,0,0,0,0,0,0,0,0,0,0,0,0,0,0,0,0,0,0,0,0,0,0,0,0,0,0,0,0,0,0,0,0,0,0,0,0,0,0,0,0,0,0,0,0,0,0,0,0,0,0,0,0,0,0,0,0,0,0,0,0,0,0,0,0,0,0,0,0,0,0,0,0,0,0,0,0,0,0,0,0,0,0,0,0,0,0,0,0,0,0,0,0,0,0,0,0,0,0,0,0,0,0,0,0,0,0,0,0…	MAGIv3.1_14696	MAGIv3.1_14696	chr01	3379126	Consistent
24	gnp_QAF22g04	sk	-	chr01	2.6	0	-	-	Genoplante Map	0,0,0,0,2,0,1,2,0,2,0,2,0,1,1,1,1,0,0,0,2,2,2,1,0,1,1,1,2,1,2,1,1,1,0,0,1,0,0,0,0,0,2,2,0,0,0,1,0,2,1,0,0,2,0,2,1,0,0,0,0,1,2,0,0,0,0,0,1,1,0,2,0,0,0,0,0,0,0,0,0,0,0,0,0,0,0,0,0,0,0,0,0,0,0,0,0,0,0,0,0,0,0,0,0,0,0,0,0,0,0,0,0,0,0,0,0,0,0,0,0,0,0,0,0,0,0,0,0,0,0,0,0,0,0,0,0,0,0,0,0,0,0,0,0,0,0,0,0,0,0,0,0,0,0,0,0,0,0,0,0,0,0,0,0,0,0,0,0,0,0,0,0,0,0,0,0,0,0,0,0,0,0,0,0,0,0,0,0,0,0,0,0,0,0,0,0,0,0,0…	CD976856	-	-	-	-
25	TIDP3021	sk	-	chr01	2.6	0	Co-Dominant	TGCE	ISU Map7	1,0,0,0,2,0,1,2,0,2,0,2,0,1,1,1,1,0,0,0,2,2,2,1,0,1,1,1,2,1,2,1,1,1,0,0,1,2,0,0,2,0,2,2,0,2,1,1,0,2,1,0,2,2,0,2,1,0,1,0,0,1,2,0,0,0,0,0,1,1,2,2,0,2,0,0,0,0,0,0,0,0,0,0,0,0,0,0,0,0,0,0,0,0,0,0,0,0,0,0,0,0,0,0,0,0,0,0,0,0,0,0,0,0,0,0,0,0,0,0,0,0,0,0,0,0,0,0,0,0,0,0,0,0,0,0,0,0,0,0,0,0,0,0,0,0,0,0,0,0,0,0,0,0,0,0,0,0,0,0,0,0,0,0,0,0,0,0,0,0,0,0,0,0,0,0,0,0,0,0,0,0,0,0,0,0,0,0,0,0,0,0,0,0,0,0,0,0,0,0…	MAGIv3.1_111443	-	-	-	-
26	TIDP3308	mu	TIDP3021	chr01	2.6	2.8	Co-Dominant	TGCE	ISU Map7	1,0,0,0,2,0,1,2,0,2,0,2,0,1,1,1,1,0,0,2,2,2,2,1,0,0,1,1,2,1,2,1,1,1,0,0,1,2,0,0,2,0,2,2,0,2,1,1,0,2,1,0,2,2,0,2,1,0,1,0,0,1,2,0,0,0,0,0,1,1,2,0,0,2,0,0,0,0,0,0,0,0,0,0,0,0,0,0,0,0,0,0,0,0,0,0,0,0,0,0,0,0,0,0,0,0,0,0,0,0,0,0,0,0,0,0,0,0,0,0,0,0,0,0,0,0,0,0,0,0,0,0,0,0,0,0,0,0,0,0,0,0,0,0,0,0,0,0,0,0,0,0,0,0,0,0,0,0,0,0,0,0,0,0,0,0,0,0,0,0,0,0,0,0,0,0,0,0,0,0,0,0,0,0,0,0,0,0,0,0,0,0,0,0,0,0,0,0,0,0…	MAGIv3.1_101072	MAGIv3.1_101072	chr01	3167344	Consistent
27	IDP6908	sk	-	chr01	4.7	0	Co-Dominant	Size	ISU Map7	1,0,0,0,2,0,1,2,0,2,0,2,0,1,1,1,1,0,0,1,2,2,2,2,0,1,1,1,2,1,2,2,1,1,0,0,1,2,0,0,1,0,2,2,0,2,1,1,0,2,1,0,2,2,0,2,1,0,1,0,0,1,2,0,0,0,0,0,1,1,2,2,0,2,0,0,0,0,0,0,0,0,0,0,0,0,0,0,0,0,0,0,0,0,0,0,0,0,0,0,0,0,0,0,0,0,0,0,0,0,0,0,0,0,0,0,0,0,0,0,0,0,0,0,0,0,0,0,0,0,0,0,0,0,0,0,0,0,0,0,0,0,0,0,0,0,0,0,0,0,0,0,0,0,0,0,0,0,0,0,0,0,0,0,0,0,0,0,0,0,0,0,0,0,0,0,0,0,0,0,0,0,0,0,0,0,0,0,0,0,0,0,0,0,0,0,0,0,0,0…	MAGIv3.1_102095	MAGIv3.1_102095	chr01	3442716	Consistent
28	bnl5.62a	mu	IDP6908	chr01	4.7	0.7	-	-	MMP	1,0,1,0,0,0,1,2,2,2,0,0,2,1,0,1,1,2,1,0,2,2,2,2,1,1,1,1,2,1,2,2,1,1,2,0,1,2,2,0,1,2,2,2,1,2,1,1,0,2,0,1,2,2,1,2,1,1,1,0,0,1,2,2,0,0,0,0,1,1,2,2,0,2,2,2,2,2,0,1,1,1,0,0,0,1,1,2,1,1,1,2,0,1,2,0,0,1,1,0,1,1,2,0,1,1,2,0,0,0,0,2,0,0,1,1,2,2,0,0,2,1,2,2,0,0,2,2,2,2,0,2,1,0,0,0,0,1,0,2,2,0,2,2,1,1,0,1,1,0,1,1,1,0,0,0,2,2,1,2,0,1,1,2,2,0,0,1,2,1,2,2,1,1,0,2,0,2,1,0,1,0,2,1,0,2,0,2,2,0,0,0,1,2,2,2,0,2,1,2…	-	-	-	-	-
29	IDP1447	mu	IDP6908	chr01	4.7	2.3	Dominant	+/-	ISU Map7	1,0,0,0,2,0,1,2,0,2,0,2,0,1,1,1,1,0,0,1,2,2,2,2,0,1,1,1,2,1,2,2,1,1,0,0,1,2,0,0,1,0,2,2,0,2,1,1,0,2,1,0,2,2,0,2,1,0,1,0,0,1,2,0,0,0,0,0,1,1,2,2,0,2,0,0,0,0,0,0,0,0,0,0,0,0,0,0,0,0,0,0,0,0,0,0,0,0,0,0,0,0,0,0,0,0,0,0,0,0,0,0,0,0,0,0,0,0,0,0,0,0,0,0,0,0,0,0,0,0,0,0,0,0,0,0,0,0,0,0,0,0,0,0,0,0,0,0,0,0,0,0,0,0,0,0,0,0,0,0,0,0,0,0,0,0,0,0,0,0,0,0,0,0,0,0,0,0,0,0,0,0,0,0,0,0,0,0,0,0,0,0,0,0,0,0,0,0,0,0…	MAGIv3.1_82205	MAGIv3.1_82205	chr01	3603992	Consistent
30	AY110314	mu	IDP6908	chr01	4.7	1.9	-	-	MMP	1,0,1,0,2,0,1,2,2,2,0,2,2,1,1,1,1,2,1,1,2,2,2,2,1,0,1,1,2,0,2,2,1,0,2,0,1,2,2,2,0,2,1,2,1,2,1,1,0,2,1,0,2,2,1,2,1,1,0,0,0,1,2,1,0,0,0,0,1,0,0,2,0,2,2,1,2,2,0,1,0,0,0,2,0,0,0,2,0,1,1,0,0,1,2,0,0,1,1,0,1,1,2,1,1,1,2,0,2,2,0,0,0,2,0,1,2,2,2,1,2,2,2,2,0,0,2,2,2,2,0,2,1,0,0,0,0,1,1,2,2,0,2,2,1,0,0,1,1,0,1,1,2,0,2,2,2,1,1,2,0,1,1,1,2,0,0,1,2,1,2,2,2,2,1,2,1,2,1,0,1,0,2,0,2,2,2,2,2,0,0,1,0,0,2,2,0,2,0,2…	AC194482,BV151329,CC835314,BV151334,BV151333,BV151338,BV151337,AW267178,BV151332,AY110314,BV151336,BV151331,BV151335,BV151330,BV151339,CC835313	BV151329,BV151338,BV151336,BV151331,BV151335,BV151330,BV151339	chr01	3705965	Consistent
31	TIDP3309	sk	-	chr01	6.5	0	Co-Dominant	TGCE	ISU Map7	1,0,0,0,2,0,1,2,0,2,0,2,0,1,1,1,1,0,0,1,2,2,2,2,0,1,1,1,2,1,2,2,1,1,0,0,1,2,0,0,1,0,1,2,0,2,1,1,0,2,1,0,2,2,0,2,1,0,0,0,0,1,0,0,0,0,0,0,1,1,1,2,0,2,0,0,0,0,0,0,0,0,0,0,0,0,0,0,0,0,0,0,0,0,0,0,0,0,0,0,0,0,0,0,0,0,0,0,0,0,0,0,0,0,0,0,0,0,0,0,0,0,0,0,0,0,0,0,0,0,0,0,0,0,0,0,0,0,0,0,0,0,0,0,0,0,0,0,0,0,0,0,0,0,0,0,0,0,0,0,0,0,0,0,0,0,0,0,0,0,0,0,0,0,0,0,0,0,0,0,0,0,0,0,0,0,0,0,0,0,0,0,0,0,0,0,0,0,0,0…	MAGIv3.1_87010	MAGIv3.1_87010	chr01	3706617	Consistent
32	mmp102	mu	TIDP3309	chr01	6.5	1.2	-	-	MMP	1,0,1,0,2,0,1,2,0,2,1,2,0,1,1,1,1,2,1,1,2,0,2,2,0,1,1,1,2,0,0,2,1,1,2,1,1,2,2,2,1,2,1,2,0,0,0,1,0,2,0,1,0,2,1,2,1,1,1,0,0,1,2,2,0,0,1,0,1,1,1,2,0,2,2,0,2,2,0,1,1,1,1,2,2,0,1,2,1,1,1,2,0,1,2,0,0,1,1,0,1,1,2,0,1,1,2,0,2,2,0,0,0,1,0,1,0,0,2,1,2,1,0,2,2,0,2,2,2,2,0,2,1,2,2,0,1,1,1,2,2,0,0,2,1,1,0,1,1,0,1,1,2,0,2,2,2,1,1,2,0,1,1,1,2,1,0,1,2,1,2,2,1,1,1,2,1,2,1,1,1,1,2,1,2,2,2,2,2,0,2,0,1,2,2,2,0,0,1,2…	CC835313,AZ916031,CC835314,CC146665,CC146666	-	-	-	-
33	TIDP3590	mu	TIDP3309	chr01	6.5	0.4	Co-Dominant	TGCE	ISU Map7	1,0,0,0,2,0,1,2,0,2,0,2,0,1,1,1,1,0,0,1,2,2,2,2,0,1,1,1,2,1,2,2,1,1,0,0,1,1,0,0,1,0,1,2,0,2,1,1,0,2,1,0,2,2,0,2,1,0,1,0,0,1,2,0,0,0,0,0,1,1,1,0,0,2,0,0,0,0,0,0,0,0,0,0,0,0,0,0,0,0,0,0,0,0,0,0,0,0,0,0,0,0,0,0,0,0,0,0,0,0,0,0,0,0,0,0,0,0,0,0,0,0,0,0,0,0,0,0,0,0,0,0,0,0,0,0,0,0,0,0,0,0,0,0,0,0,0,0,0,0,0,0,0,0,0,0,0,0,0,0,0,0,0,0,0,0,0,0,0,0,0,0,0,0,0,0,0,0,0,0,0,0,0,0,0,0,0,0,0,0,0,0,0,0,0,0,0,0,0,0…	MAGIv3.1_98496	MAGIv3.1_98496	chr01	3682379	Consistent
34	gnp_QCG5f03	mu	TIDP3309	chr01	6.5	0.4	-	-	Genoplante Map	1,0,0,0,2,0,1,2,0,2,0,2,0,1,1,1,1,0,0,1,2,2,2,2,0,1,1,1,2,1,2,2,0,1,0,0,1,0,0,0,0,0,1,2,0,0,1,1,0,2,1,0,0,2,0,2,1,0,0,0,0,0,0,0,0,0,0,0,0,1,0,2,0,0,0,0,0,0,0,0,0,0,0,0,0,0,0,0,0,0,0,0,0,0,0,0,0,0,0,0,0,0,0,0,0,0,0,0,0,0,0,0,0,0,0,0,0,0,0,0,0,0,0,0,0,0,0,0,0,0,0,0,0,0,0,0,0,0,0,0,0,0,0,0,0,0,0,0,0,0,0,0,0,0,0,0,0,0,0,0,0,0,0,0,0,0,0,0,0,0,0,0,0,0,0,0,0,0,0,0,0,0,0,0,0,0,0,0,0,0,0,0,0,0,0,0,0,0,0,0…	CF037360	CF037360	chr09	149697039	Inconsistent
35	IDP1464	mu	TIDP3309	chr01	6.5	3.1	Co-Dominant	Size	ISU Map7	1,2,0,2,2,2,1,2,0,2,1,2,2,1,1,1,1,0,0,1,2,2,2,2,1,1,1,1,2,1,2,2,2,1,0,0,1,2,0,1,1,2,1,2,1,2,1,1,2,2,1,1,2,2,1,2,1,0,0,1,1,1,2,0,2,2,1,1,0,1,1,2,1,2,2,1,0,2,1,2,1,0,1,2,2,1,1,2,1,1,1,2,2,1,2,1,1,1,1,1,1,2,0,1,1,1,2,1,1,0,1,2,1,1,1,1,2,2,0,1,2,1,2,2,0,0,2,2,2,2,2,2,0,2,0,1,1,1,1,0,2,1,2,2,1,1,1,1,1,1,1,0,2,1,2,2,2,0,0,0,1,2,0,1,1,1,1,1,2,0,0,0,1,0,1,2,1,0,1,1,1,1,2,1,2,1,2,2,0,2,1,1,1,2,0,2,2,2,1,2…	MAGIv4.0_40264	-	-	-	-
36	umc94a	mu	TIDP3309	chr01	6.5	0.5	-	-	MMP	1,0,1,0,0,0,1,2,2,2,0,2,2,1,1,1,1,1,1,0,2,2,2,2,1,1,1,2,2,1,2,2,2,1,2,2,1,2,2,0,1,2,1,2,1,2,1,1,0,2,0,1,2,2,1,2,1,1,1,0,0,1,2,2,0,0,0,0,1,1,1,2,0,2,2,0,2,2,0,1,1,1,1,0,0,1,1,2,1,1,1,2,0,1,2,0,0,1,1,0,0,1,2,0,1,1,2,0,0,0,0,2,0,0,1,1,2,2,0,0,2,1,2,2,0,0,2,2,2,2,0,2,0,0,0,0,0,1,0,2,2,0,2,1,1,2,0,1,1,0,1,1,2,0,2,2,2,1,1,2,0,2,1,0,2,0,0,1,2,1,2,0,0,1,0,2,1,2,1,1,1,1,2,2,2,1,0,2,2,0,0,0,1,2,2,2,0,2,1,2…	-	-	-	-	-
37	gnp_QAF45a12	sk	-	chr01	8.3	0	-	-	Genoplante Map	1,0,0,0,2,0,1,2,0,2,0,0,0,1,1,1,1,0,0,1,2,2,2,2,0,1,1,2,2,1,2,2,2,1,0,0,1,0,0,0,0,0,1,2,0,0,1,1,0,2,1,0,0,0,0,2,1,0,0,0,0,1,0,0,0,0,0,0,1,1,0,2,0,0,0,0,0,0,0,0,0,0,0,0,0,0,0,0,0,0,0,0,0,0,0,0,0,0,0,0,0,0,0,0,0,0,0,0,0,0,0,0,0,0,0,0,0,0,0,0,0,0,0,0,0,0,0,0,0,0,0,0,0,0,0,0,0,0,0,0,0,0,0,0,0,0,0,0,0,0,0,0,0,0,0,0,0,0,0,0,0,0,0,0,0,0,0,0,0,0,0,0,0,0,0,0,0,0,0,0,0,0,0,0,0,0,0,0,0,0,0,0,0,0,0,0,0,0,0,0…	CD978571	CD978571	chr01	4171508	Consistent
38	lim179	mu	gnp_QAF45a12	chr01	8.3	2.5	-	-	MMP	1,0,1,0,2,0,1,2,2,2,1,1,2,1,1,1,1,1,2,1,2,2,2,2,1,2,1,2,2,1,2,2,2,2,2,2,0,2,2,2,1,2,1,2,1,2,1,1,0,2,1,1,1,2,1,1,1,1,1,0,0,1,2,2,0,0,1,0,2,1,1,2,0,2,1,1,2,2,0,1,1,1,1,2,2,1,1,1,2,1,1,2,0,0,2,0,0,1,1,0,2,1,2,1,1,1,2,0,1,2,0,1,0,2,1,1,2,2,2,1,0,0,0,0,0,2,2,2,2,2,0,2,2,2,2,0,1,1,1,2,2,0,2,1,1,2,0,1,1,0,1,1,2,0,2,2,2,1,1,1,0,2,1,1,2,2,0,1,2,1,2,2,2,1,1,2,1,2,1,1,1,1,2,2,2,2,1,1,2,0,2,0,0,2,2,2,0,2,1,2…	-	-	-	-	-
39	IDP2420	mu	gnp_QAF45a12	chr01	8.3	1.4	Dominant	+/-	ISU Map7	1,0,0,0,2,0,1,2,0,2,0,1,0,1,1,1,1,0,0,1,1,2,2,2,0,2,1,2,2,1,2,2,2,1,0,0,1,2,0,0,1,0,1,2,0,2,1,1,0,2,1,0,1,2,0,2,1,0,1,0,0,1,2,0,0,0,0,0,2,1,1,2,0,1,0,0,0,0,0,0,0,0,0,0,0,0,0,0,0,0,0,0,0,0,0,0,0,0,0,0,0,0,0,0,0,0,0,0,0,0,0,0,0,0,0,0,0,0,0,0,0,0,0,0,0,0,0,0,0,0,0,0,0,0,0,0,0,0,0,0,0,0,0,0,0,0,0,0,0,0,0,0,0,0,0,0,0,0,0,0,0,0,0,0,0,0,0,0,0,0,0,0,0,0,0,0,0,0,0,0,0,0,0,0,0,0,0,0,0,0,0,0,0,0,0,0,0,0,0,0…	MEC_34160_P95-Mar06	MEC_34160_P95-Mar06	chr01	4732485	Consistent
40	IDP4094	mu	gnp_QAF45a12	chr01	8.3	1.3	Dominant	+/-	ISU Map7	1,2,2,2,2,2,1,2,0,2,1,1,2,1,1,1,1,0,0,1,2,2,2,2,1,2,1,2,2,1,2,2,2,1,0,0,1,2,0,1,1,2,1,2,1,2,1,1,2,2,1,1,1,2,1,1,1,0,0,1,1,1,2,0,1,2,1,1,0,1,1,2,1,1,1,2,0,1,1,1,1,0,1,2,2,1,1,1,2,1,1,2,2,1,2,1,1,1,1,2,2,1,0,1,1,1,2,2,1,0,2,1,1,1,1,1,2,2,0,1,2,1,2,2,0,0,2,2,2,2,2,2,0,2,0,1,1,1,1,0,2,1,2,1,1,2,1,1,1,1,1,0,2,2,2,2,2,0,2,2,1,2,0,1,1,2,1,1,2,0,0,0,2,0,1,2,1,0,1,1,1,1,2,2,2,1,2,1,0,2,2,1,2,2,2,2,2,2,1,2…	MAGIv3.1_109084	MAGIv3.1_109084	chr01	4725999	Consistent
41	MAGI_8999	mu	gnp_QAF45a12	chr01	8.3	0.7	-	SNP	ISU SNP Map	1,2,0,2,2,2,1,2,0,2,1,1,2,1,1,1,1,0,0,1,1,2,2,0,1,2,1,2,2,1,2,2,2,1,0,0,1,2,0,0,2,2,1,2,1,2,1,1,2,2,1,1,1,2,1,1,1,0,0,1,1,1,2,0,1,2,1,0,0,1,1,2,1,1,1,2,0,2,1,1,1,0,1,2,2,1,1,1,2,1,1,2,2,1,2,1,1,1,1,2,2,1,0,1,1,1,2,2,1,0,0,1,1,1,1,1,2,2,0,1,2,1,2,2,0,0,2,2,2,2,2,1,0,2,0,1,1,1,1,0,2,1,2,1,0,2,1,1,1,1,1,0,2,2,2,2,0,0,0,0,1,0,0,1,1,2,1,1,2,0,0,0,2,0,1,2,1,0,1,1,1,2,2,2,2,1,2,1,0,2,2,1,1,2,2,2,2,2,1,2…	MAGIv3.1_8999	MAGIv3.1_8999	chr01	4957367	Consistent
42	IDP1395	sk	-	chr01	11.6	0	Co-Dominant	Size	ISU Map7	1,2,0,2,2,2,1,2,0,2,1,1,2,1,1,1,1,0,0,1,1,2,2,2,1,2,1,2,2,1,2,2,2,1,0,0,1,2,0,1,2,2,1,2,1,2,1,1,2,2,1,1,1,2,1,1,1,0,0,1,1,1,2,0,1,2,1,1,0,1,1,2,1,1,1,1,0,2,1,1,1,0,1,2,2,1,1,1,2,1,1,2,2,1,2,1,1,1,1,2,2,1,0,1,1,1,2,1,1,0,2,1,1,1,1,1,2,2,0,1,2,1,2,2,0,0,2,2,2,2,2,1,0,2,0,1,1,1,1,0,2,1,2,1,1,2,1,1,1,1,1,0,2,2,2,2,1,0,0,0,1,2,0,1,1,2,1,1,2,0,0,0,2,0,1,2,1,0,1,1,1,2,2,2,2,1,2,1,0,2,1,1,1,2,2,2,2,2,1,2…	MAGIv4.0_140752	-	-	-	-
43	TIDP4556	mu	IDP1395	chr01	11.6	0.7	Co-Dominant	TGCE	ISU Map7	1,0,0,0,2,0,1,2,0,2,0,1,0,1,1,1,1,0,0,1,1,2,2,2,0,2,1,2,2,1,2,2,2,1,0,0,1,2,0,0,1,0,1,2,0,2,1,1,0,2,1,0,1,2,0,1,1,0,1,0,0,1,2,0,0,0,0,0,2,1,1,2,0,1,0,0,0,0,0,0,0,0,0,0,0,0,0,0,0,0,0,0,0,0,0,0,0,0,0,0,0,0,0,0,0,0,0,0,0,0,0,0,0,0,0,0,0,0,0,0,0,0,0,0,0,0,0,0,0,0,0,0,0,0,0,0,0,0,0,0,0,0,0,0,0,0,0,0,0,0,0,0,0,0,0,0,0,0,0,0,0,0,0,0,0,0,0,0,0,0,0,0,0,0,0,0,0,0,0,0,0,0,0,0,0,0,0,0,0,0,0,0,0,0,0,0,0,0,0,0…	MAGIv3.1_103288	MAGIv3.1_103288	chr01	4739210	Consistent
44	TIDP2922	mu	IDP1395	chr01	11.6	1.4	Co-Dominant	TGCE	ISU Map7	1,0,0,0,2,0,1,2,0,2,0,1,0,1,1,1,1,0,0,1,1,2,2,2,0,2,1,2,2,1,2,2,2,1,0,0,1,2,0,0,2,0,1,2,0,2,1,1,0,2,1,0,1,2,0,1,1,0,1,0,0,1,2,0,0,0,0,0,2,1,1,2,0,2,0,0,0,0,0,0,0,0,0,0,0,0,0,0,0,0,0,0,0,0,0,0,0,0,0,0,0,0,0,0,0,0,0,0,0,0,0,0,0,0,0,0,0,0,0,0,0,0,0,0,0,0,0,0,0,0,0,0,0,0,0,0,0,0,0,0,0,0,0,0,0,0,0,0,0,0,0,0,0,0,0,0,0,0,0,0,0,0,0,0,0,0,0,0,0,0,0,0,0,0,0,0,0,0,0,0,0,0,0,0,0,0,0,0,0,0,0,0,0,0,0,0,0,0,0,0…	MAGIv4.0_140752	-	-	-	-
45	IDP658	mu	IDP1395	chr01	11.6	3.2	Dominant	+/-	ISU Map7	1,2,2,2,2,2,1,2,0,2,1,1,2,1,1,1,1,0,0,1,1,2,2,2,1,2,1,2,2,1,2,2,2,1,0,0,1,2,0,1,2,2,1,2,1,2,1,1,2,2,1,1,1,2,1,1,1,0,0,1,1,1,2,0,1,2,1,1,0,2,1,2,1,1,1,1,0,2,1,1,1,0,2,2,2,1,1,1,2,1,1,2,2,1,2,1,1,1,1,2,2,1,0,1,1,1,2,1,1,0,2,1,1,1,1,1,2,2,0,1,2,1,2,2,0,0,2,2,2,2,2,1,0,2,0,1,1,1,1,0,2,1,2,1,1,2,1,1,1,1,1,0,2,2,2,2,1,0,0,0,1,2,0,1,1,2,1,1,2,0,0,0,2,0,1,2,1,0,1,1,1,2,2,2,2,1,2,1,0,2,1,1,1,2,2,2,2,2,1,2…	MEC_84504_P95-Mar06	MEC_84504_P95-Mar06	chr01	4967419	Consistent
46	IMR8	mu	IDP1395	chr01	11.6	2.8	Dominant	+/-	ISU Map7	1,2,2,2,2,2,1,1,0,1,2,1,2,1,1,1,1,0,0,2,1,2,1,2,1,2,1,2,2,1,2,2,2,1,0,0,1,2,0,1,2,2,1,2,1,2,2,1,2,2,1,1,1,2,2,1,1,0,0,1,1,1,2,0,1,2,1,1,0,2,1,2,1,1,1,1,0,2,1,1,1,0,1,2,2,1,2,1,2,1,1,2,2,1,2,2,1,1,1,1,1,1,0,1,1,1,2,1,1,0,2,2,1,1,1,2,2,2,0,1,2,1,2,2,0,0,2,2,2,2,2,2,0,2,0,1,1,2,1,0,2,1,2,1,1,2,1,1,1,1,1,0,2,2,2,2,1,0,0,0,1,2,0,1,1,2,1,1,2,0,0,0,1,0,1,2,1,0,1,1,1,2,2,2,2,1,2,1,0,2,1,1,1,2,2,1,2,2,1,2…	MAGIv3.1_62261	MAGIv3.1_62261	chr01	5061815	Consistent
47	mmp49	sk	-	chr01	15.3	0	-	-	MMP	1,0,2,0,2,0,1,2,2,1,2,1,0,1,1,1,2,1,2,1,1,0,1,2,1,2,1,2,2,1,0,2,2,1,1,2,1,2,2,2,2,2,1,2,0,0,2,1,0,2,0,1,1,0,0,1,1,1,1,0,0,1,2,2,0,0,1,0,2,1,1,2,0,1,1,1,2,2,0,1,0,1,1,0,0,0,1,1,2,1,1,0,0,1,2,0,0,1,1,0,0,1,2,0,1,1,1,0,1,0,2,0,0,1,1,0,0,0,0,0,2,0,0,0,2,0,2,2,2,2,0,2,1,2,2,0,1,2,1,2,2,0,2,1,1,2,0,1,1,0,1,1,2,0,2,2,1,1,1,1,0,2,1,1,2,2,0,1,2,1,2,1,0,1,1,2,1,2,1,1,1,2,2,2,2,1,1,1,2,0,2,1,1,2,2,1,0,2,1,0…	AZ916287	AZ916287	chr01	5062213	Consistent
48	IDP7620	mu	mmp49	chr01	15.3	4	Co-Dominant	Size	ISU Map7	1,2,0,2,2,2,1,1,0,2,2,1,2,1,1,1,1,0,0,1,1,2,1,2,1,2,1,2,2,1,2,2,2,1,0,0,1,2,0,1,2,2,1,2,1,2,2,1,2,2,1,1,1,2,1,1,1,0,0,2,1,1,2,0,1,2,1,1,0,1,1,2,1,1,1,1,0,2,1,1,1,0,2,2,2,1,1,1,2,1,1,2,2,1,2,2,1,1,1,2,2,1,0,1,1,1,2,1,1,0,1,2,2,2,1,2,2,2,0,1,2,1,2,2,0,0,2,1,2,1,2,1,0,2,0,1,1,2,1,0,2,1,2,1,1,2,1,1,1,1,1,0,2,2,0,2,1,0,0,0,1,2,0,1,1,2,1,1,2,0,0,0,2,0,0,2,1,0,1,1,1,2,2,2,2,1,2,1,0,2,1,1,0,1,2,1,2,2,1,2…	MAGIv3.1_98466	-	-	-	-
49	IDP755	mu	mmp49	chr01	15.3	1.1	Dominant	-/+	ISU Map7	1,1,1,1,2,2,1,1,0,1,2,1,2,1,1,1,2,0,0,2,1,2,1,1,1,1,1,2,2,1,2,2,2,1,0,0,1,2,0,1,2,2,1,2,1,2,2,1,2,2,1,1,1,2,2,1,1,0,0,1,1,1,2,0,1,2,1,1,0,1,1,2,1,1,1,1,0,2,1,1,1,0,1,2,2,1,1,1,2,1,1,2,2,1,2,2,1,1,1,1,1,1,0,1,1,1,2,1,1,0,1,2,1,1,1,2,2,2,0,1,2,2,2,2,0,0,2,2,2,2,2,1,0,2,0,1,1,2,1,0,2,1,2,1,1,2,1,1,1,1,1,0,2,2,2,2,1,0,1,1,1,2,0,1,1,2,1,1,2,0,0,0,1,0,1,2,1,0,1,1,1,2,1,2,2,1,2,1,0,2,1,2,1,2,2,1,2,2,1,2…	MEC_77944_P95-Mar06	-	-	-	-
50	MAGI_112436	mu	mmp49	chr01	15.3	1.8	-	SNP	ISU SNP Map	1,0,0,2,2,2,1,2,0,1,2,1,2,1,1,1,2,0,0,2,1,2,1,1,1,1,1,2,2,1,2,2,2,1,0,0,1,2,0,0,2,2,1,2,1,2,2,1,2,2,1,1,1,2,2,2,1,0,0,1,1,1,2,0,1,2,1,0,0,1,1,2,1,1,1,1,0,2,1,1,1,0,1,2,2,1,1,1,2,1,1,2,2,1,2,2,1,1,1,1,1,1,0,1,1,1,2,1,1,0,1,2,1,1,1,0,2,2,0,1,2,2,2,2,0,0,2,2,2,2,2,2,0,2,0,1,1,2,1,0,2,1,2,1,0,2,1,1,1,1,1,0,2,2,2,2,1,0,0,0,1,2,0,1,1,2,1,1,2,0,0,0,1,0,1,2,1,0,1,1,1,2,2,2,2,1,2,1,0,2,1,2,1,2,2,1,2,2,1,2…	MAGIv3.1_112436	-	-	-	-
51	TIDP3219	mu	mmp49	chr01	15.3	1	Co-Dominant	TGCE	ISU Map7	1,0,0,0,2,0,1,2,0,1,0,1,0,1,1,1,2,0,0,2,1,2,1,1,0,2,1,2,2,1,2,2,2,1,0,0,1,2,0,0,2,0,1,2,0,2,2,1,0,2,1,0,1,2,0,1,1,0,1,0,0,1,2,0,0,0,0,0,2,1,1,2,0,2,0,0,0,0,0,0,0,0,0,0,0,0,0,0,0,0,0,0,0,0,0,0,0,0,0,0,0,0,0,0,0,0,0,0,0,0,0,0,0,0,0,0,0,0,0,0,0,0,0,0,0,0,0,0,0,0,0,0,0,0,0,0,0,0,0,0,0,0,0,0,0,0,0,0,0,0,0,0,0,0,0,0,0,0,0,0,0,0,0,0,0,0,0,0,0,0,0,0,0,0,0,0,0,0,0,0,0,0,0,0,0,0,0,0,0,0,0,0,0,0,0,0,0,0,0,0…	MAGIv4.0_38502	MAGIv4.0_38502	chr01	5301854	Consistent
52	TIDP3060	mu	mmp49	chr01	15.3	1.8	Co-Dominant	TGCE	ISU Map7	1,0,0,0,2,0,1,2,0,1,0,1,0,1,1,1,2,0,0,2,1,2,1,1,0,1,1,2,2,1,2,2,2,1,0,0,1,2,0,0,2,0,1,2,0,2,2,1,0,2,1,0,1,2,0,1,1,0,1,0,0,1,2,0,0,0,0,0,2,1,1,2,0,2,0,0,0,0,0,0,0,0,0,0,0,0,0,0,0,0,0,0,0,0,0,0,0,0,0,0,0,0,0,0,0,0,0,0,0,0,0,0,0,0,0,0,0,0,0,0,0,0,0,0,0,0,0,0,0,0,0,0,0,0,0,0,0,0,0,0,0,0,0,0,0,0,0,0,0,0,0,0,0,0,0,0,0,0,0,0,0,0,0,0,0,0,0,0,0,0,0,0,0,0,0,0,0,0,0,0,0,0,0,0,0,0,0,0,0,0,0,0,0,0,0,0,0,0,0,0…	MAGIv3.1_55958	-	-	-	-
53	bnlg1179	sk	-	chr01	16.9	0	-	-	Genoplante Map	1,0,0,0,2,0,1,2,0,1,0,1,0,1,1,1,2,0,0,2,1,0,1,2,0,1,1,2,2,1,2,2,2,1,0,0,1,2,0,0,2,0,1,2,0,2,0,1,0,2,1,0,1,1,0,2,1,0,1,0,0,1,2,0,0,0,0,0,2,1,1,2,0,0,0,0,0,0,0,0,0,0,0,0,0,0,0,0,0,0,0,0,0,0,0,0,0,0,0,0,0,0,0,0,0,0,0,0,0,0,0,0,0,0,0,0,0,0,0,0,0,0,0,0,0,0,0,0,0,0,0,0,0,0,0,0,0,0,0,0,0,0,0,0,0,0,0,0,0,0,0,0,0,0,0,0,0,0,0,0,0,0,0,0,0,0,0,0,0,0,0,0,0,0,0,0,0,0,0,0,0,0,0,0,0,0,0,0,0,0,0,0,0,0,0,0,0,0,0,0…	AC155364,CC751615,CC751616	CC751616	chr01	5371519	Consistent
54	TIDP3140	sk	-	chr01	20.6	0	Co-Dominant	TGCE	ISU Map7	2,0,0,0,2,0,1,2,0,1,0,1,0,1,1,1,2,0,0,2,2,2,1,2,0,1,1,2,2,1,2,2,2,1,0,0,1,2,0,0,2,0,1,1,0,1,2,1,0,2,1,0,1,1,0,2,1,0,1,0,0,2,1,0,0,0,0,0,2,1,1,2,0,1,0,0,0,0,0,0,0,0,0,0,0,0,0,0,0,0,0,0,0,0,0,0,0,0,0,0,0,0,0,0,0,0,0,0,0,0,0,0,0,0,0,0,0,0,0,0,0,0,0,0,0,0,0,0,0,0,0,0,0,0,0,0,0,0,0,0,0,0,0,0,0,0,0,0,0,0,0,0,0,0,0,0,0,0,0,0,0,0,0,0,0,0,0,0,0,0,0,0,0,0,0,0,0,0,0,0,0,0,0,0,0,0,0,0,0,0,0,0,0,0,0,0,0,0,0,0…	MAGIv3.1_112276	MAGIv3.1_112276	chr01	6185866	Consistent
55	gnp_AI770496b	mu	TIDP3140	chr01	20.6	0.5	-	-	Genoplante Map	2,0,0,0,2,0,1,2,0,1,0,1,0,1,0,1,2,0,0,2,1,0,1,2,0,0,0,2,2,1,2,2,2,1,0,0,1,0,0,0,0,0,1,1,0,0,2,1,0,2,1,0,0,1,0,2,1,0,0,0,0,2,1,0,0,0,0,0,2,1,0,2,0,0,0,0,0,0,0,0,0,0,0,0,0,0,0,0,0,0,0,0,0,0,0,0,0,0,0,0,0,0,0,0,0,0,0,0,0,0,0,0,0,0,0,0,0,0,0,0,0,0,0,0,0,0,0,0,0,0,0,0,0,0,0,0,0,0,0,0,0,0,0,0,0,0,0,0,0,0,0,0,0,0,0,0,0,0,0,0,0,0,0,0,0,0,0,0,0,0,0,0,0,0,0,0,0,0,0,0,0,0,0,0,0,0,0,0,0,0,0,0,0,0,0,0,0,0,0,0…	AI770496	AI770496	chr09	149193655	Inconsistent
56	gnp_QAE39c01	mu	TIDP3140	chr01	20.6	0	-	-	Genoplante Map	0,0,0,0,2,0,1,2,0,1,0,1,0,1,1,1,2,0,0,2,0,2,1,2,0,1,1,2,2,1,2,2,2,1,0,0,1,0,0,0,0,0,1,1,0,0,0,1,0,2,1,0,0,1,0,2,1,0,0,0,0,2,1,0,0,0,0,0,2,1,0,2,0,0,0,0,0,0,0,0,0,0,0,0,0,0,0,0,0,0,0,0,0,0,0,0,0,0,0,0,0,0,0,0,0,0,0,0,0,0,0,0,0,0,0,0,0,0,0,0,0,0,0,0,0,0,0,0,0,0,0,0,0,0,0,0,0,0,0,0,0,0,0,0,0,0,0,0,0,0,0,0,0,0,0,0,0,0,0,0,0,0,0,0,0,0,0,0,0,0,0,0,0,0,0,0,0,0,0,0,0,0,0,0,0,0,0,0,0,0,0,0,0,0,0,0,0,0,0,0…	CX129451	CX129451	chr01	6182581	Consistent
57	gnp_QAF41d06	mu	TIDP3140	chr01	20.6	0.4	-	-	Genoplante Map	2,0,0,0,2,0,1,2,0,1,0,1,0,1,1,1,2,0,0,2,1,2,1,2,0,1,1,2,2,1,2,2,2,1,0,0,1,0,0,0,0,0,1,1,0,0,2,1,0,2,1,0,0,1,0,2,1,0,0,0,0,2,1,0,0,0,0,0,2,1,0,2,0,0,0,0,0,0,0,0,0,0,0,0,0,0,0,0,0,0,0,0,0,0,0,0,0,0,0,0,0,0,0,0,0,0,0,0,0,0,0,0,0,0,0,0,0,0,0,0,0,0,0,0,0,0,0,0,0,0,0,0,0,0,0,0,0,0,0,0,0,0,0,0,0,0,0,0,0,0,0,0,0,0,0,0,0,0,0,0,0,0,0,0,0,0,0,0,0,0,0,0,0,0,0,0,0,0,0,0,0,0,0,0,0,0,0,0,0,0,0,0,0,0,0,0,0,0,0,0…	CD978291	CD978291	chr01	5778197	Consistent
58	asg31	mu	TIDP3140	chr01	20.6	1.4	-	-	MMP	2,0,1,0,2,0,1,2,2,1,0,1,2,1,1,1,2,1,2,2,1,0,1,2,1,1,1,2,2,1,2,2,2,1,1,1,1,2,2,2,2,2,1,1,1,1,2,1,0,2,1,1,1,1,2,2,1,1,1,0,0,2,1,1,0,0,1,0,2,1,1,2,0,1,1,1,2,2,0,1,1,1,1,1,0,1,1,1,1,1,1,2,0,1,1,0,0,1,1,0,1,1,2,1,1,1,0,0,1,0,0,2,0,1,1,2,2,1,2,1,2,2,2,2,1,0,2,2,2,2,0,2,1,2,2,0,1,2,1,0,2,0,2,1,1,2,0,2,1,0,1,1,2,0,1,2,1,1,1,1,0,2,1,1,2,0,0,1,2,1,2,1,1,1,1,2,2,2,1,1,1,2,1,2,1,2,1,1,2,0,0,1,1,2,0,1,0,2,2,2…	-	-	-	-	-
59	umc1041	mu	TIDP3140	chr01	20.6	2.9	-	-	Genoplante Map	1,0,0,0,1,0,1,2,0,1,0,1,0,1,1,1,2,0,0,2,1,1,1,2,0,1,1,2,2,1,2,2,2,1,0,0,1,2,0,0,2,0,1,1,0,1,2,1,0,2,1,0,1,1,0,2,1,0,1,0,0,2,1,0,0,0,0,0,2,1,1,2,0,1,0,0,0,0,0,0,0,0,0,0,0,0,0,0,0,0,0,0,0,0,0,0,0,0,0,0,0,0,0,0,0,0,0,0,0,0,0,0,0,0,0,0,0,0,0,0,0,0,0,0,0,0,0,0,0,0,0,0,0,0,0,0,0,0,0,0,0,0,0,0,0,0,0,0,0,0,0,0,0,0,0,0,0,0,0,0,0,0,0,0,0,0,0,0,0,0,0,0,0,0,0,0,0,0,0,0,0,0,0,0,0,0,0,0,0,0,0,0,0,0,0,0,0,0,0,0…	AC155430,CC741802,CC786266,G44698,CC786267	-	-	-	-
60	IDP3852	mu	TIDP3140	chr01	20.6	2.6	Dominant	-/+	ISU Map7	2,1,1,2,1,2,1,1,0,1,1,1,2,1,1,1,2,0,0,2,1,2,1,2,1,1,1,2,2,1,2,2,2,1,0,0,1,2,0,1,2,2,1,1,1,1,2,1,2,2,0,1,1,1,2,2,1,0,0,1,2,2,1,0,1,2,1,1,0,1,1,2,1,1,1,1,0,2,1,1,1,0,1,1,1,1,1,1,1,1,1,2,2,1,1,2,1,1,1,1,1,1,0,1,1,1,2,2,1,0,1,2,1,1,1,2,2,1,0,1,2,2,2,2,0,0,2,2,2,2,2,1,0,2,0,2,2,1,2,0,1,2,1,2,2,1,2,1,2,2,2,0,1,1,2,1,2,0,0,0,1,2,0,1,1,2,1,1,2,0,0,0,1,0,1,2,2,0,1,1,1,2,1,2,1,2,2,1,0,2,1,2,1,2,2,1,2,2,2,2…	CC633822	CC633822	chr01	5767430	Consistent
61	TIDP5224	mu	TIDP3140	chr01	20.6	0.7	Co-Dominant	TGCE	ISU Map7	2,0,0,0,2,0,1,2,0,1,0,1,0,1,1,1,2,0,0,2,2,2,1,2,0,1,1,2,2,1,2,2,2,1,0,0,1,2,0,0,2,0,1,1,0,1,2,1,0,2,1,0,1,1,0,2,1,0,1,0,0,2,1,0,0,0,0,0,2,1,1,2,0,1,0,0,0,0,0,0,0,0,0,0,0,0,0,0,0,0,0,0,0,0,0,0,0,0,0,0,0,0,0,0,0,0,0,0,0,0,0,0,0,0,0,0,0,0,0,0,0,0,0,0,0,0,0,0,0,0,0,0,0,0,0,0,0,0,0,0,0,0,0,0,0,0,0,0,0,0,0,0,0,0,0,0,0,0,0,0,0,0,0,0,0,0,0,0,0,0,0,0,0,0,0,0,0,0,0,0,0,0,0,0,0,0,0,0,0,0,0,0,0,0,0,0,0,0,0,0…	MAGIv3.1_64459	MAGIv3.1_64459	chr01	6206407	Consistent
62	MAGI_64459	sk	-	chr01	22	0	-	SNP	ISU SNP Map	2,1,0,2,2,2,1,2,0,1,2,1,2,1,1,1,2,0,0,2,1,2,1,2,1,1,1,2,2,1,2,2,2,1,0,0,1,2,0,0,2,2,1,1,1,1,2,1,2,2,1,1,1,1,2,2,1,0,0,1,2,2,1,0,1,2,0,0,0,1,1,2,1,1,1,1,0,2,1,1,1,0,1,1,1,1,1,1,1,1,1,2,2,0,1,2,1,1,1,1,1,1,0,1,1,1,2,2,1,0,2,2,1,1,1,2,2,1,0,1,0,2,2,2,0,0,2,2,2,2,2,2,0,2,0,1,1,2,1,0,2,1,2,1,0,2,1,2,1,0,1,0,2,2,1,2,1,0,0,0,1,2,0,1,1,2,1,1,2,0,0,0,1,0,1,2,2,0,1,1,1,2,1,0,1,2,2,1,0,2,1,2,1,2,2,1,2,2,2,2…	MAGIv3.1_64459	MAGIv3.1_64459	chr01	6206407	Consistent
63	MAGI_32158	mu	MAGI_64459	chr01	22	2	-	SNP	ISU SNP Map	0,1,0,0,2,2,1,2,0,1,1,2,2,1,1,1,2,0,0,2,1,2,1,2,1,1,1,2,2,1,2,2,2,1,0,0,1,2,0,0,2,2,1,1,1,1,2,1,2,2,1,1,2,1,2,2,1,0,0,1,2,2,1,0,1,2,1,0,0,1,1,2,1,1,1,1,0,2,2,1,1,0,1,1,1,1,1,1,1,1,1,2,2,1,1,2,1,1,1,1,1,1,0,2,1,1,2,2,1,0,2,1,1,1,1,2,2,1,0,1,2,2,2,2,0,0,2,2,2,2,2,2,0,2,0,1,1,2,1,0,2,1,2,1,0,2,1,2,1,1,1,0,2,2,1,2,1,0,0,0,2,2,0,1,1,2,1,1,2,0,0,0,1,0,1,2,2,0,1,1,1,2,1,2,1,2,2,1,0,2,1,2,1,2,2,1,2,2,2,2…	MAGIv3.1_32158	-	-	-	-
64	IDP5027	mu	MAGI_64459	chr01	22	1.3	Dominant	+/-	ISU Map7	2,1,2,2,2,2,1,1,0,1,1,1,2,1,1,1,2,0,0,2,1,2,1,2,1,2,1,2,2,1,2,2,2,1,0,0,1,2,0,1,2,2,1,1,1,1,2,1,2,2,1,2,1,1,2,2,1,0,0,1,2,2,1,0,1,2,1,1,0,1,1,2,1,1,1,1,0,2,1,1,1,0,1,1,1,1,1,1,1,1,1,2,2,1,1,2,1,1,1,1,1,1,0,1,1,1,2,2,1,0,1,2,1,1,1,2,2,1,0,1,2,2,2,2,0,0,2,2,2,2,2,2,0,2,0,1,1,2,1,0,2,1,2,1,1,2,1,2,1,1,1,0,2,2,1,2,1,0,2,2,1,2,0,1,1,2,1,1,2,0,0,0,1,0,2,2,2,0,1,1,1,2,1,2,1,2,2,1,0,2,1,2,1,2,2,1,2,2,2,2…	MAGIv3.1_63384	MAGIv3.1_63384	chr01	5628329	Consistent
65	npi415	mu	MAGI_64459	chr01	22	2.2	-	-	MMP	2,0,1,0,0,0,1,2,2,1,0,0,2,1,1,1,2,1,2,0,1,0,1,2,1,1,1,2,2,1,2,2,2,1,1,1,1,2,2,0,2,2,1,1,1,1,2,1,0,2,0,1,1,1,2,2,1,1,1,0,0,2,1,1,0,0,0,0,2,1,1,2,0,1,1,1,2,2,0,1,1,1,1,1,0,1,1,1,1,1,1,2,0,1,1,0,0,1,1,0,1,1,2,0,1,1,2,0,0,0,0,2,0,0,1,2,2,1,0,0,2,2,2,2,0,0,2,2,2,2,0,2,1,0,0,0,0,2,0,2,2,0,2,1,1,2,0,2,1,0,1,1,2,0,1,2,1,2,1,1,0,2,1,1,2,0,0,1,2,1,2,1,1,1,0,2,2,2,1,0,1,2,1,0,1,2,0,1,2,0,0,0,1,2,2,1,0,2,2,2…	-	-	-	-	-
66	ufg31	mu	MAGI_64459	chr01	22	0.3	-	-	MMP	2,0,1,0,2,0,1,1,2,1,2,2,0,1,1,1,2,1,2,1,0,2,1,2,0,1,1,0,2,1,2,2,2,1,1,2,1,2,2,1,2,2,1,1,1,1,2,1,0,2,2,1,2,2,2,2,0,1,1,0,0,2,1,2,0,0,0,0,2,1,1,2,0,0,1,0,2,2,0,1,0,1,1,1,1,0,0,1,1,1,0,0,0,1,1,0,0,0,1,0,1,0,2,0,0,1,2,0,1,1,0,0,0,1,0,2,0,0,2,0,2,0,0,0,2,0,2,2,2,2,0,2,1,2,2,0,1,2,1,2,2,0,2,1,1,2,0,2,1,0,1,1,2,0,1,2,1,1,1,2,0,2,1,1,2,0,0,1,2,1,2,1,1,1,2,2,2,2,1,1,1,2,1,2,1,2,1,1,2,0,2,0,1,2,2,1,0,2,2,2…	BH417863	-	-	-	-
67	ufg33	mu	MAGI_64459	chr01	22	0.5	-	-	MMP	2,0,1,0,2,0,1,1,0,1,2,2,0,1,1,1,2,1,2,1,0,2,1,2,0,1,1,2,2,1,0,2,2,1,1,2,1,2,2,1,2,0,1,1,1,1,0,1,0,2,0,1,0,0,0,2,0,1,1,0,0,2,1,0,0,0,1,0,2,1,1,2,0,1,1,2,2,2,0,1,1,1,1,1,1,0,1,1,1,1,1,2,0,1,1,0,0,1,1,0,1,1,2,2,1,1,2,0,1,1,2,0,0,1,0,2,2,0,2,1,2,2,0,2,0,1,2,2,2,2,0,1,1,2,2,0,1,2,1,2,2,0,2,1,1,2,0,2,1,0,1,1,2,0,1,2,1,1,1,2,0,2,1,1,2,0,0,1,2,1,2,1,1,1,2,2,2,2,1,1,1,2,1,2,1,2,1,1,2,0,2,2,1,2,2,1,0,0,2,2…	BH417863	-	-	-	-
68	ufg32	mu	MAGI_64459	chr01	22	0.9	-	-	MMP	2,0,1,0,2,0,1,1,0,1,2,2,0,1,1,2,2,1,2,2,0,2,1,2,0,1,1,2,2,1,2,2,2,1,1,2,1,2,2,1,2,2,1,1,1,1,2,1,0,2,0,1,0,0,2,2,1,1,1,0,0,2,1,2,0,0,1,0,0,1,1,2,0,1,1,0,0,2,0,1,1,2,1,1,1,0,1,1,1,1,1,0,0,1,1,0,0,0,1,0,1,1,2,0,1,1,2,0,1,1,2,0,0,1,0,2,0,0,2,1,2,0,0,0,2,0,2,2,2,2,0,1,1,2,2,0,0,0,0,2,2,0,2,1,1,2,0,2,1,0,1,1,2,0,1,2,1,1,1,2,0,2,1,1,2,0,0,1,2,1,2,1,1,1,2,2,2,2,1,1,1,2,1,2,1,2,1,1,2,0,2,0,1,2,2,1,0,2,2,2…	BH418243	-	-	-	-
69	ufg34	mu	MAGI_64459	chr01	22	2.1	-	-	MMP	2,0,1,0,2,0,1,1,0,1,2,2,0,1,1,1,2,1,2,2,1,2,1,2,0,1,1,2,2,1,2,2,2,1,1,2,1,2,2,1,2,2,1,1,1,1,2,1,0,2,0,1,2,2,2,2,0,0,0,0,0,2,0,2,0,0,1,0,0,1,1,2,0,1,1,0,2,2,0,1,1,1,1,1,1,0,1,1,1,1,1,0,0,1,1,0,0,0,1,0,1,1,2,0,1,1,2,0,1,1,2,0,0,0,0,2,0,0,0,0,2,0,0,0,0,0,2,2,2,2,0,1,1,2,2,0,1,2,1,2,2,0,2,1,1,2,0,2,1,0,1,1,2,0,1,2,1,1,1,2,0,2,1,1,2,0,0,1,2,1,2,1,1,2,2,2,2,1,2,2,0,0,0,0,1,2,1,1,2,0,2,0,1,2,2,1,0,2,2,2…	BH417863	-	-	-	-
70	gnp_AI739837	mu	MAGI_64459	chr01	22	0.9	-	-	Genoplante Map	0,0,0,0,2,0,1,1,0,1,0,2,0,1,1,1,2,0,0,2,2,0,1,2,0,1,1,2,2,1,1,2,0,0,0,0,1,0,0,0,0,0,1,1,0,0,2,1,0,2,1,0,0,0,0,2,1,0,0,0,0,2,1,0,0,0,0,0,2,1,0,2,0,0,0,0,0,0,0,0,0,0,0,0,0,0,0,0,0,0,0,0,0,0,0,0,0,0,0,0,0,0,0,0,0,0,0,0,0,0,0,0,0,0,0,0,0,0,0,0,0,0,0,0,0,0,0,0,0,0,0,0,0,0,0,0,0,0,0,0,0,0,0,0,0,0,0,0,0,0,0,0,0,0,0,0,0,0,0,0,0,0,0,0,0,0,0,0,0,0,0,0,0,0,0,0,0,0,0,0,0,0,0,0,0,0,0,0,0,0,0,0,0,0,0,0,0,0,0,0…	AI739837	-	-	-	-
71	php20537b	sk	-	chr01	23.3	0	-	-	MMP	2,0,1,0,0,0,1,1,2,1,0,0,2,1,1,1,2,1,2,0,0,0,1,2,1,1,1,2,2,1,2,2,2,1,1,2,1,2,2,0,2,2,1,1,1,1,2,1,0,2,0,1,2,1,2,2,1,1,1,0,0,2,1,2,0,0,0,0,2,1,1,2,0,1,1,0,2,2,0,1,1,1,1,1,0,1,1,1,1,1,0,2,0,1,1,0,0,1,1,0,0,1,2,0,1,1,2,0,0,0,0,2,0,0,1,2,2,1,0,0,2,2,2,2,0,0,2,2,2,2,0,2,1,0,0,0,0,2,0,2,2,0,2,1,1,2,0,2,1,0,1,2,2,0,1,2,1,2,1,2,0,2,1,1,2,0,0,1,2,1,2,1,1,1,0,2,2,2,1,0,1,2,1,2,1,2,0,1,2,0,0,0,1,2,2,1,0,2,2,2…	-	-	-	-	-
72	TIDP3058	mu	php20537b	chr01	23.3	2.6	Co-Dominant	TGCE	ISU Map7	2,0,0,0,2,0,1,1,0,1,0,2,0,1,1,1,2,0,0,2,2,2,1,2,0,1,1,2,2,1,2,2,2,1,0,0,1,2,0,0,2,0,1,1,0,1,2,1,0,2,1,0,2,1,0,0,1,0,1,0,0,2,1,0,0,0,0,0,2,1,1,2,0,1,0,0,0,0,0,0,0,0,0,0,0,0,0,0,0,0,0,0,0,0,0,0,0,0,0,0,0,0,0,0,0,0,0,0,0,0,0,0,0,0,0,0,0,0,0,0,0,0,0,0,0,0,0,0,0,0,0,0,0,0,0,0,0,0,0,0,0,0,0,0,0,0,0,0,0,0,0,0,0,0,0,0,0,0,0,0,0,0,0,0,0,0,0,0,0,0,0,0,0,0,0,0,0,0,0,0,0,0,0,0,0,0,0,0,0,0,0,0,0,0,0,0,0,0,0,0…	MAGIv4.0_87039	-	-	-	-
73	IDP8147	sk	-	chr01	26.3	0	Co-Dominant	Size	ISU Map7	2,1,0,1,2,2,1,1,0,1,2,2,2,1,1,1,2,0,0,2,1,2,1,2,1,1,1,2,2,1,2,2,2,1,0,0,1,2,0,1,2,2,1,1,1,2,2,1,2,2,1,1,2,1,2,2,1,0,0,1,2,2,1,0,1,2,1,0,0,1,1,2,1,1,1,2,0,2,2,1,1,0,1,1,1,1,1,1,1,1,1,2,2,1,1,2,1,1,1,1,1,1,0,2,1,1,2,2,1,0,1,2,1,1,1,2,2,2,0,2,2,2,2,2,0,0,2,2,2,2,2,1,0,2,0,1,1,2,1,0,2,2,2,1,1,2,1,2,1,1,1,0,2,2,1,2,2,0,0,0,2,2,0,1,1,1,1,2,2,0,0,0,1,0,2,2,2,0,1,2,1,2,2,2,1,2,2,1,0,2,1,2,1,1,2,1,2,2,2,2…	MAGIv3.1_51399	MAGIv3.1_51399	chr01	7206537	Consistent
74	IDP6813	mu	IDP8147	chr01	26.3	1.8	Dominant	-/+	ISU Map7	2,1,0,1,1,2,1,1,0,1,2,2,2,1,1,1,2,0,0,2,1,2,1,2,1,1,1,2,2,1,2,2,2,1,0,0,1,2,0,1,2,2,1,1,1,2,2,1,2,2,1,1,2,1,2,2,1,0,0,1,2,2,1,0,1,2,1,2,0,2,1,2,1,1,1,1,0,2,2,1,1,0,1,1,1,1,1,1,1,1,1,2,2,1,1,2,1,1,1,1,1,1,0,2,1,1,2,2,1,0,1,2,1,1,1,2,2,2,0,2,2,2,2,2,0,0,2,2,2,2,2,1,0,2,0,1,1,2,1,0,2,1,2,1,2,2,1,2,1,1,1,0,2,2,1,2,2,0,0,0,2,2,0,1,1,2,1,2,2,0,0,0,1,0,2,2,2,0,1,2,1,2,2,2,1,2,2,1,0,2,1,2,1,1,2,1,2,2,1,2…	MAGIv3.1_87366	MAGIv3.1_87366	chr01	7276589	Consistent
75	IDP3825	mu	IDP8147	chr01	26.3	1.6	Co-Dominant	Size	ISU Map7	2,1,0,1,2,2,1,1,0,1,2,2,2,1,1,1,2,0,0,2,1,2,1,2,1,1,1,2,2,1,2,2,2,1,0,0,1,2,0,1,2,2,1,1,1,2,2,1,2,2,1,1,2,1,2,2,1,0,0,1,2,2,1,0,1,2,1,1,0,1,1,2,1,1,1,2,0,2,2,1,1,0,1,1,1,1,1,1,1,1,1,2,2,1,1,2,1,1,1,1,1,1,0,2,1,1,2,2,1,0,1,2,1,1,1,2,2,2,0,2,2,2,2,2,0,0,2,2,2,2,2,1,0,2,0,1,1,2,1,0,2,2,2,1,0,2,1,2,1,1,1,0,2,0,1,2,2,0,0,0,2,2,0,1,1,1,1,2,2,0,0,0,1,0,2,2,2,0,1,2,1,2,0,2,1,2,2,1,0,2,2,2,1,1,2,1,2,2,2,2…	MAGIv3.1_27991	MAGIv3.1_27991	chr01	7123842	Consistent
76	IDP4043	mu	IDP8147	chr01	26.3	1	Dominant	+/-	ISU Map7	2,1,2,2,2,2,1,1,0,1,2,2,2,2,1,1,2,0,0,2,1,2,1,2,1,1,1,2,2,1,2,2,2,1,0,0,1,2,0,1,2,2,1,1,1,2,2,1,2,2,1,1,2,1,2,2,1,0,0,1,1,2,1,0,1,2,1,1,0,1,1,2,1,1,1,2,0,2,2,1,1,0,1,1,1,1,1,1,1,1,1,2,2,1,1,2,1,1,1,1,1,1,0,2,1,1,2,2,1,0,2,2,1,1,1,2,2,2,0,2,2,2,2,2,0,0,2,2,2,2,2,1,0,2,0,1,1,2,1,0,2,2,2,1,1,2,1,2,1,1,1,0,2,2,1,2,2,0,0,0,2,2,0,1,1,1,1,2,2,0,0,0,1,0,2,2,2,0,1,2,1,2,1,2,1,2,2,1,0,2,1,2,1,1,2,1,2,2,2,2…	ZGBA202.F,ZGBA713.R,ZGBA856.F,ZGBA992.F,ZGBAB09.F,ZGBAB43.F,ZGBAE26.F	ZGBA202.F,ZGBA713.R,ZGBA856.F,ZGBA992.F,ZGBAB09.F,ZGBAB43.F,ZGBAE26.F	chr01	7421144	Consistent
77	IDP131	mu	IDP8147	chr01	26.3	1.4	Dominant	+/-	ISU Map7	0,0,0,0,0,0,0,0,0,0,0,0,0,0,0,0,0,0,0,0,0,0,0,0,0,0,0,0,0,0,0,0,0,0,0,0,0,0,0,0,0,0,0,0,0,0,0,0,0,0,0,0,0,0,0,0,0,0,0,0,0,0,0,0,0,0,0,0,0,0,0,0,0,0,0,0,0,0,0,0,0,0,0,0,0,0,0,0,0,0,0,0,0,0,0,0,0,0,0,0,0,0,0,0,0,0,0,0,0,0,0,0,0,0,0,0,0,0,0,0,0,0,0,0,0,0,0,0,0,0,0,0,0,0,0,0,0,0,0,0,0,0,0,0,0,0,0,0,0,0,0,0,0,0,0,0,0,0,0,0,0,0,0,0,0,0,0,0,0,0,0,0,0,0,0,0,0,0,0,0,0,0,0,0,0,0,0,0,0,0,0,0,0,0,0,0,0,0,0,0…	MAGIv4.0_137743	-	-	-	-
78	TIDP3353	mu	IDP8147	chr01	26.3	2.2	Co-Dominant	TGCE	ISU Map7	2,0,0,0,2,0,1,2,0,1,0,0,0,1,1,1,2,0,0,2,2,1,1,2,0,1,1,2,2,1,2,2,2,1,0,0,1,2,0,0,2,0,1,1,0,2,2,1,0,2,1,0,0,1,0,2,1,0,1,0,0,2,2,0,0,0,0,0,2,1,1,2,0,1,0,0,0,0,0,0,0,0,0,0,0,0,0,0,0,0,0,0,0,0,0,0,0,0,0,0,0,0,0,0,0,0,0,0,0,0,0,0,0,0,0,0,0,0,0,0,0,0,0,0,0,0,0,0,0,0,0,0,0,0,0,0,0,0,0,0,0,0,0,0,0,0,0,0,0,0,0,0,0,0,0,0,0,0,0,0,0,0,0,0,0,0,0,0,0,0,0,0,0,0,0,0,0,0,0,0,0,0,0,0,0,0,0,0,0,0,0,0,0,0,0,0,0,0,0,0…	DN949669	DN949669	chr01	8549032	Consistent
79	php20603	mu	IDP8147	chr01	26.3	0	-	-	MMP	2,0,1,0,0,0,1,2,2,1,0,0,2,1,1,1,2,1,1,0,2,1,1,2,1,1,1,2,2,1,2,2,2,1,2,2,1,2,2,0,2,2,1,1,2,2,2,1,0,2,0,1,2,0,2,2,1,1,1,0,0,2,2,2,0,0,0,0,2,1,1,2,0,0,1,2,2,2,0,1,0,0,0,1,0,1,2,1,1,1,1,2,0,2,1,0,0,1,1,0,1,1,2,0,0,1,2,0,0,0,0,2,0,0,1,2,2,2,0,0,2,2,2,2,0,0,2,1,2,1,0,1,1,0,0,0,0,2,0,2,2,0,2,1,1,2,0,2,1,0,1,1,2,0,2,2,2,2,1,2,0,2,1,1,2,0,0,1,2,1,2,1,1,1,0,2,2,2,1,0,2,2,2,2,1,2,0,1,2,0,0,0,1,1,1,1,0,2,2,2…	-	-	-	-	-
80	MAGI_44384	mu	IDP8147	chr01	26.3	0.9	-	SNP	ISU SNP Map	2,1,0,1,2,2,1,2,0,1,2,2,2,1,1,1,2,0,0,2,1,2,1,2,1,1,1,2,2,1,2,2,2,1,0,0,1,2,0,0,2,2,1,1,2,2,2,1,2,2,1,1,2,1,2,2,1,0,0,1,1,2,1,0,1,2,1,0,0,1,1,2,1,1,1,2,0,2,2,1,1,0,1,1,2,1,2,1,1,1,1,2,2,2,1,2,1,1,1,1,1,1,0,2,1,1,2,2,1,0,1,1,1,1,1,2,2,2,0,2,2,2,2,2,0,0,2,2,2,2,2,1,0,2,0,1,1,2,1,0,2,1,2,1,0,2,1,2,1,1,1,0,2,2,2,2,2,0,0,0,2,2,0,2,1,2,1,1,2,0,0,0,1,0,2,2,2,0,1,2,2,2,2,2,1,2,2,1,0,2,1,2,1,1,1,1,1,2,2,2…	MAGIv3.1_44384	MAGIv3.1_44384	chr01	8001221	Consistent
81	IDP108	mu	IDP8147	chr01	26.3	0.7	Co-Dominant	Size	ISU Map7	2,1,0,1,2,2,1,0,0,1,2,2,2,1,1,1,2,0,0,2,1,0,1,0,1,1,1,2,2,1,2,2,2,1,0,0,1,2,0,1,2,2,1,1,2,2,2,1,2,2,1,1,2,1,2,2,1,0,0,1,1,2,1,0,1,2,1,0,0,1,1,2,1,1,1,2,0,2,2,1,1,0,1,1,2,1,2,1,1,1,1,2,2,2,1,2,1,1,1,1,1,1,0,2,1,1,2,2,1,0,1,2,1,1,1,2,2,2,0,2,2,2,2,2,0,0,2,2,2,2,2,1,0,2,0,1,1,2,1,0,2,2,2,1,0,2,1,2,1,1,1,0,2,2,2,2,2,0,0,0,2,2,0,2,1,0,1,1,2,0,0,0,1,0,2,2,2,0,1,2,2,2,0,2,1,2,2,1,0,2,1,2,1,1,1,1,1,2,2,2…	MAGIv3.1_110233	MAGIv3.1_110233	chr01	8075823	Consistent
82	IDP553	mu	IDP8147	chr01	26.3	0.4	Dominant	+/-	ISU Map7	2,0,0,0,2,0,1,2,0,1,0,2,0,1,1,1,2,0,0,2,2,2,1,2,0,1,1,2,2,1,2,2,2,1,0,0,1,2,0,0,2,0,1,1,0,2,2,1,0,2,1,0,2,1,0,2,1,0,1,0,0,2,1,0,0,0,0,0,2,1,1,2,0,1,0,0,0,0,0,0,0,0,0,0,0,0,0,0,0,0,0,0,0,0,0,0,0,0,0,0,0,0,0,0,0,0,0,0,0,0,0,0,0,0,0,0,0,0,0,0,0,0,0,0,0,0,0,0,0,0,0,0,0,0,0,0,0,0,0,0,0,0,0,0,0,0,0,0,0,0,0,0,0,0,0,0,0,0,0,0,0,0,0,0,0,0,0,0,0,0,0,0,0,0,0,0,0,0,0,0,0,0,0,0,0,0,0,0,0,0,0,0,0,0,0,0,0,0,0,0…	MAGIv4.0_150233	-	-	-	-
83	IDP780a	mu	IDP8147	chr01	26.3	0	Dominant	+/-	ISU Map7	2,0,0,0,2,0,1,2,0,1,0,2,0,1,1,1,2,0,0,2,2,2,1,2,0,1,1,2,2,1,2,2,2,1,0,0,1,2,0,0,2,0,1,1,0,2,2,1,0,2,1,0,2,1,0,2,1,0,1,0,0,2,1,0,0,0,0,0,2,1,1,2,0,1,0,0,0,0,0,0,0,0,0,0,0,0,0,0,0,0,0,0,0,0,0,0,0,0,0,0,0,0,0,0,0,0,0,0,0,0,0,0,0,0,0,0,0,0,0,0,0,0,0,0,0,0,0,0,0,0,0,0,0,0,0,0,0,0,0,0,0,0,0,0,0,0,0,0,0,0,0,0,0,0,0,0,0,0,0,0,0,0,0,0,0,0,0,0,0,0,0,0,0,0,0,0,0,0,0,0,0,0,0,0,0,0,0,0,0,0,0,0,0,0,0,0,0,0,0,0…	MEC_93672_P95-Mar06	-	-	-	-
84	TIDP2778	mu	IDP8147	chr01	26.3	0	Co-Dominant	TGCE	ISU Map7	2,0,0,0,2,0,1,2,0,1,0,2,0,1,1,1,2,0,0,2,2,2,1,2,0,1,1,2,2,1,2,2,2,1,0,0,1,2,0,0,2,0,1,1,0,2,2,1,0,2,1,0,2,1,0,2,1,0,1,0,0,2,1,0,0,0,0,0,2,1,1,2,0,1,0,0,0,0,0,0,0,0,0,0,0,0,0,0,0,0,0,0,0,0,0,0,0,0,0,0,0,0,0,0,0,0,0,0,0,0,0,0,0,0,0,0,0,0,0,0,0,0,0,0,0,0,0,0,0,0,0,0,0,0,0,0,0,0,0,0,0,0,0,0,0,0,0,0,0,0,0,0,0,0,0,0,0,0,0,0,0,0,0,0,0,0,0,0,0,0,0,0,0,0,0,0,0,0,0,0,0,0,0,0,0,0,0,0,0,0,0,0,0,0,0,0,0,0,0,0…	MAGIv3.1_5656	MAGIv3.1_5656	chr01	8367591	Consistent
85	TIDP4604	mu	IDP8147	chr01	26.3	1	Co-Dominant	TGCE	ISU Map7	2,0,0,0,2,0,1,2,0,1,0,0,0,1,1,1,2,0,0,2,2,2,1,2,0,1,1,2,2,1,2,2,2,1,0,0,1,2,0,0,2,0,1,1,0,2,2,1,0,2,1,0,2,1,0,2,1,0,1,0,0,2,1,0,0,0,0,0,2,1,1,2,0,1,0,0,0,0,0,0,0,0,0,0,0,0,0,0,0,0,0,0,0,0,0,0,0,0,0,0,0,0,0,0,0,0,0,0,0,0,0,0,0,0,0,0,0,0,0,0,0,0,0,0,0,0,0,0,0,0,0,0,0,0,0,0,0,0,0,0,0,0,0,0,0,0,0,0,0,0,0,0,0,0,0,0,0,0,0,0,0,0,0,0,0,0,0,0,0,0,0,0,0,0,0,0,0,0,0,0,0,0,0,0,0,0,0,0,0,0,0,0,0,0,0,0,0,0,0,0…	OGVFI94.F,ZGAO219.R,ZGAO668.R,ZGAO737.R,ZGDC706.R,ZGDC729.R,ZGDCA08.R,ZGDCB22.R	ZGAO219.R,ZGAO668.R,ZGAO737.R,ZGDC706.R,ZGDC729.R,ZGDCA08.R,ZGDCB22.R	chr01	7987011	Consistent
86	TIDP3426	mu	IDP8147	chr01	26.3	0.7	Co-Dominant	TGCE	ISU Map7	2,0,0,0,2,0,1,2,0,1,0,2,0,1,1,1,2,0,0,2,1,2,1,2,0,1,1,2,2,1,2,2,2,1,0,0,1,2,0,0,2,0,1,1,0,1,0,1,0,2,1,0,2,1,0,2,1,0,1,0,0,2,1,0,0,0,0,0,2,1,1,2,0,1,0,0,0,0,0,0,0,0,0,0,0,0,0,0,0,0,0,0,0,0,0,0,0,0,0,0,0,0,0,0,0,0,0,0,0,0,0,0,0,0,0,0,0,0,0,0,0,0,0,0,0,0,0,0,0,0,0,0,0,0,0,0,0,0,0,0,0,0,0,0,0,0,0,0,0,0,0,0,0,0,0,0,0,0,0,0,0,0,0,0,0,0,0,0,0,0,0,0,0,0,0,0,0,0,0,0,0,0,0,0,0,0,0,0,0,0,0,0,0,0,0,0,0,0,0,0…	MAGIv3.1_96211	MAGIv3.1_96211	chr01	7823290	Consistent
87	TIDP3525	mu	IDP8147	chr01	26.3	0.7	Co-Dominant	TGCE	ISU Map7	2,0,0,0,2,0,1,2,0,1,0,2,0,1,1,1,2,0,0,2,1,2,0,2,0,1,1,2,2,1,2,2,2,0,0,0,1,2,0,0,2,0,1,1,0,2,2,1,0,2,1,0,2,1,0,2,1,0,1,0,0,2,1,0,0,0,0,0,2,1,1,2,0,1,0,0,0,0,0,0,0,0,0,0,0,0,0,0,0,0,0,0,0,0,0,0,0,0,0,0,0,0,0,0,0,0,0,0,0,0,0,0,0,0,0,0,0,0,0,0,0,0,0,0,0,0,0,0,0,0,0,0,0,0,0,0,0,0,0,0,0,0,0,0,0,0,0,0,0,0,0,0,0,0,0,0,0,0,0,0,0,0,0,0,0,0,0,0,0,0,0,0,0,0,0,0,0,0,0,0,0,0,0,0,0,0,0,0,0,0,0,0,0,0,0,0,0,0,0,0…	MAGIv3.1_96211	MAGIv3.1_96211	chr01	7823290	Consistent
88	umc1363	mu	IDP8147	chr01	26.3	0.5	-	-	MMP	2,0,1,0,2,0,1,2,2,1,2,2,2,1,1,1,0,1,1,2,1,1,1,2,1,1,1,2,2,1,2,2,2,1,2,2,1,2,2,1,2,2,1,1,1,2,2,1,0,2,1,1,2,1,0,0,1,1,1,0,0,2,1,0,0,0,1,0,2,1,1,2,0,1,1,1,2,2,0,1,1,1,1,1,1,1,1,1,1,1,1,2,0,1,1,0,0,1,1,0,1,1,2,2,1,1,2,0,1,1,1,2,0,1,1,2,2,2,2,2,2,2,2,0,1,1,2,2,2,2,0,1,1,2,2,0,1,2,1,2,2,0,2,1,1,2,0,2,1,0,1,1,2,0,1,2,2,1,1,2,0,0,1,1,2,1,0,2,2,1,2,1,1,1,2,2,2,2,1,2,1,2,2,2,1,2,1,1,2,0,2,1,1,1,2,1,0,2,2,2…	-	-	-	-	-
89	gnp_QBI3c08	mu	IDP8147	chr01	26.3	0.8	-	-	Genoplante Map	0,0,0,0,2,0,1,2,0,1,0,2,0,1,1,1,2,0,0,2,0,2,1,2,0,1,1,2,2,1,2,2,2,1,0,0,1,0,0,0,0,0,1,1,0,0,0,1,0,2,1,0,0,1,0,2,1,0,0,0,0,2,1,0,0,0,0,0,2,1,0,2,0,0,0,0,0,0,0,0,0,0,0,0,0,0,0,0,0,0,0,0,0,0,0,0,0,0,0,0,0,0,0,0,0,0,0,0,0,0,0,0,0,0,0,0,0,0,0,0,0,0,0,0,0,0,0,0,0,0,0,0,0,0,0,0,0,0,0,0,0,0,0,0,0,0,0,0,0,0,0,0,0,0,0,0,0,0,0,0,0,0,0,0,0,0,0,0,0,0,0,0,0,0,0,0,0,0,0,0,0,0,0,0,0,0,0,0,0,0,0,0,0,0,0,0,0,0,0,0…	CF007556	CF007556	chr01	7310512	Consistent
90	TIDP3374	mu	IDP8147	chr01	26.3	0	Co-Dominant	TGCE	ISU Map7	2,0,0,0,2,0,1,2,0,1,0,2,0,1,1,1,2,0,0,2,1,2,1,2,0,1,1,2,2,1,2,2,2,1,0,0,1,2,0,0,2,0,0,1,0,2,2,1,0,2,1,0,2,1,0,2,1,0,1,0,0,2,1,0,0,0,0,0,2,1,0,2,0,1,0,0,0,0,0,0,0,0,0,0,0,0,0,0,0,0,0,0,0,0,0,0,0,0,0,0,0,0,0,0,0,0,0,0,0,0,0,0,0,0,0,0,0,0,0,0,0,0,0,0,0,0,0,0,0,0,0,0,0,0,0,0,0,0,0,0,0,0,0,0,0,0,0,0,0,0,0,0,0,0,0,0,0,0,0,0,0,0,0,0,0,0,0,0,0,0,0,0,0,0,0,0,0,0,0,0,0,0,0,0,0,0,0,0,0,0,0,0,0,0,0,0,0,0,0,0…	MAGIv4.0_55953	-	-	-	-
91	IDP4725	mu	IDP8147	chr01	26.3	1.9	Dominant	+/-	ISU Map7	1,1,2,1,2,2,1,1,0,1,2,2,2,1,1,1,2,0,0,2,1,2,1,2,1,1,1,2,2,1,2,2,2,1,0,0,1,2,0,1,2,2,1,1,1,2,2,1,2,2,1,1,2,1,2,2,1,0,0,1,2,2,1,0,1,2,1,1,0,1,1,2,1,1,1,1,0,2,2,1,1,0,1,1,1,1,1,1,1,1,1,2,2,1,1,2,2,1,2,1,2,1,0,2,1,2,2,2,1,0,1,2,1,1,1,2,2,2,0,2,2,2,2,2,0,0,2,2,2,2,2,1,0,2,0,1,1,2,1,0,2,1,2,1,1,2,1,2,1,1,1,0,2,2,1,2,2,0,0,0,2,2,0,1,1,1,1,2,2,0,0,0,1,0,2,2,2,0,1,2,1,2,1,2,1,2,2,1,0,2,1,2,1,1,2,1,2,2,2,2…	MAGIv3.1_99630	MAGIv3.1_99630	chr01	7367181	Consistent
92	fbnlg1014	mu	IDP8147	chr01	26.3	1.8	-	-	Genoplante Map	1,0,0,0,0,0,1,2,0,1,0,2,0,1,1,1,2,0,0,2,0,0,1,2,0,1,1,2,2,1,2,2,2,2,0,0,1,2,0,0,2,0,1,1,0,2,2,1,0,2,1,0,2,1,0,2,1,0,1,0,0,2,1,0,0,0,0,0,2,1,1,2,0,1,0,0,0,0,0,0,0,0,0,0,0,0,0,0,0,0,0,0,0,0,0,0,0,0,0,0,0,0,0,0,0,0,0,0,0,0,0,0,0,0,0,0,0,0,0,0,0,0,0,0,0,0,0,0,0,0,0,0,0,0,0,0,0,0,0,0,0,0,0,0,0,0,0,0,0,0,0,0,0,0,0,0,0,0,0,0,0,0,0,0,0,0,0,0,0,0,0,0,0,0,0,0,0,0,0,0,0,0,0,0,0,0,0,0,0,0,0,0,0,0,0,0,0,0,0,0…	AC155442,CC754413	-	-	-	-
93	bnlg1014	mu	IDP8147	chr01	26.3	0	-	-	MMP	0,0,0,0,0,0,1,2,0,1,0,2,2,1,1,0,0,1,1,2,2,0,0,0,1,1,1,2,2,1,2,2,2,2,2,2,0,2,0,0,2,2,1,1,1,0,2,1,0,2,1,1,2,0,2,0,1,1,1,0,0,2,1,2,0,0,0,0,2,1,1,2,0,0,1,0,2,2,0,1,1,1,1,0,0,1,1,1,0,1,1,2,0,1,1,0,0,1,1,0,0,1,0,2,1,1,2,0,1,1,0,2,0,1,1,2,2,2,0,2,2,2,2,2,0,0,2,2,2,2,0,1,1,0,0,0,0,0,0,2,2,0,2,1,1,2,0,2,1,0,1,1,2,0,1,2,2,1,1,2,0,2,1,1,0,0,0,2,2,1,2,1,1,1,0,2,2,2,1,2,1,2,2,2,1,2,0,1,2,0,0,0,1,1,2,1,0,2,2,2…	AC155442,CC754413	-	-	-	-
94	IDP6083	mu	IDP8147	chr01	26.3	2.2	Dominant	+/-	ISU Map7	2,0,0,0,2,0,1,2,0,1,0,2,0,1,1,1,2,0,0,2,2,2,1,2,0,1,1,2,2,1,2,2,2,0,0,0,2,2,0,0,2,0,1,1,0,2,2,1,0,2,1,0,2,1,0,2,1,0,1,0,0,2,1,0,0,0,0,0,2,1,1,2,0,0,0,0,0,0,0,0,0,0,0,0,0,0,0,0,0,0,0,0,0,0,0,0,0,0,0,0,0,0,0,0,0,0,0,0,0,0,0,0,0,0,0,0,0,0,0,0,0,0,0,0,0,0,0,0,0,0,0,0,0,0,0,0,0,0,0,0,0,0,0,0,0,0,0,0,0,0,0,0,0,0,0,0,0,0,0,0,0,0,0,0,0,0,0,0,0,0,0,0,0,0,0,0,0,0,0,0,0,0,0,0,0,0,0,0,0,0,0,0,0,0,0,0,0,0,0,0…	MAGIv3.1_96211	MAGIv3.1_96211	chr01	7823290	Consistent
95	umc1269	mu	IDP8147	chr01	26.3	1.4	-	-	MMP	2,0,1,0,2,0,1,2,2,1,2,2,2,1,1,1,2,0,1,2,0,0,1,2,1,1,1,2,2,1,2,2,2,1,2,2,1,2,2,1,2,2,1,1,1,2,2,1,0,2,1,1,2,0,0,0,1,1,1,0,0,2,1,0,0,0,1,0,2,1,1,2,0,1,1,1,2,2,0,1,1,1,1,1,2,1,2,1,1,1,1,2,0,1,1,0,0,1,1,0,1,1,2,2,1,1,2,0,1,1,1,2,0,1,1,2,2,2,2,2,2,2,2,2,1,1,2,2,2,2,0,1,1,2,2,0,1,2,1,2,2,0,2,1,1,2,0,2,1,0,1,1,2,0,2,2,2,1,1,2,0,0,1,2,2,0,0,2,2,1,2,1,1,1,2,2,2,2,1,2,2,2,2,2,1,2,1,1,2,0,2,0,1,1,2,1,0,2,2,2…	CC747276,AW146792,CC747622,AI941989,AY111044,AI947344,AI947340,CC747623	AI947344	chr01	7958915	Consistent
96	umc1977	mu	IDP8147	chr01	26.3	1.4	-	-	MMP	2,0,1,0,2,0,1,2,2,1,2,2,2,1,1,1,2,1,1,2,2,2,1,2,1,1,1,2,2,1,2,2,2,1,2,2,1,2,2,1,2,2,1,1,1,1,2,1,0,2,1,1,2,2,2,2,1,1,1,0,0,1,2,2,0,0,1,0,2,1,1,2,0,1,1,2,2,2,0,1,1,1,1,1,2,1,2,1,1,1,1,2,0,2,1,0,0,1,1,0,1,1,2,2,1,1,2,0,1,1,1,2,0,1,1,2,2,2,2,1,2,2,2,2,0,0,2,2,2,2,0,1,1,2,2,0,1,2,1,2,2,0,2,1,1,2,0,2,1,0,1,1,2,0,2,2,2,1,1,2,0,2,1,2,2,2,0,1,2,1,2,1,1,1,2,2,2,2,1,2,2,2,2,2,1,2,1,1,2,0,2,0,1,1,1,1,0,2,2,2…	AC155569,BV138653,CC745866,BV138658,AY105773,BV138659,BV138650,BV138656,BV138651,CC745867,BV138657,BV138647,BV138654,BV138655,AC212892,BV138646,BE050729,BV138649,BV138660,BV138652,BV138648	-	-	-	-
97	umc2012	mu	IDP8147	chr01	26.3	0.5	-	-	MMP	2,0,1,0,2,0,1,2,2,1,2,2,2,1,1,1,2,1,1,2,0,2,1,2,1,1,1,2,2,1,2,2,2,1,2,2,1,2,2,1,2,2,1,0,1,2,2,1,0,2,1,1,2,2,2,2,1,1,1,0,0,1,2,2,0,0,1,0,2,1,1,2,0,1,1,1,2,2,0,1,1,1,1,1,2,1,1,1,1,1,1,2,0,1,1,0,0,1,1,0,1,1,2,2,1,1,2,0,1,1,1,2,0,1,1,2,2,2,2,2,2,2,2,2,1,1,2,2,2,2,0,1,1,2,2,0,1,2,1,2,2,0,2,1,1,2,0,2,1,0,1,1,2,0,2,2,2,1,1,2,0,2,1,1,2,2,0,2,2,1,2,1,1,1,2,2,2,2,1,2,2,2,2,2,1,2,1,1,2,0,0,1,1,1,2,1,0,2,2,2…	CC761264,CC785380,CC761265,CC785379	-	-	-	-
98	umc1071	sk	-	chr01	28.3	0	-	-	MMP	2,0,1,0,2,0,1,2,2,1,2,2,2,1,1,1,2,1,1,2,0,0,1,2,1,1,1,2,2,1,2,2,2,1,2,2,1,2,2,1,2,2,1,1,1,2,2,1,0,2,1,1,2,2,2,2,1,1,1,0,0,2,1,2,0,0,1,0,2,1,1,2,0,1,1,0,2,2,0,1,1,1,1,1,2,1,1,1,1,1,1,2,0,1,1,0,0,1,1,0,1,1,2,2,1,1,2,0,1,1,1,2,0,1,1,2,2,2,2,2,2,2,2,2,1,1,2,2,2,2,0,1,1,2,2,0,1,2,1,2,2,0,2,1,1,2,0,2,1,0,1,1,2,0,2,2,2,1,1,2,0,2,1,1,2,0,0,2,2,1,2,1,1,1,2,2,2,2,1,2,2,2,2,2,1,2,1,1,2,0,2,0,1,1,2,1,0,2,2,2…	AI396561	AI396561	chr01	7822644	Consistent
99	umc1948	mu	umc1071	chr01	28.3	1.9	-	-	MMP	2,0,1,0,2,0,1,2,2,1,2,2,2,1,1,1,2,1,1,2,2,1,1,2,1,1,1,2,2,1,2,2,2,1,2,2,1,2,2,1,2,2,1,1,2,2,2,1,0,2,1,1,2,2,2,2,1,1,1,0,0,2,0,2,0,0,1,0,2,1,1,2,0,1,1,2,2,2,0,1,1,1,1,1,2,1,2,1,1,1,1,2,0,2,1,0,0,1,1,0,1,1,2,2,1,1,2,0,1,2,1,2,0,1,1,2,2,2,2,1,2,2,2,2,0,1,2,1,2,1,0,1,1,2,2,0,1,2,1,2,2,0,2,1,1,2,0,2,1,0,1,1,2,0,2,2,2,1,1,2,0,2,1,1,2,0,0,1,2,1,2,1,1,1,2,2,2,2,1,2,2,2,2,2,1,2,1,1,2,0,2,1,1,1,1,1,0,2,2,2…	BE238625,BE186126,AY112599	BE238625	chr01	8530726	Consistent
100	TIDP3460	mu	umc1071	chr01	28.3	1.9	Co-Dominant	TGCE	ISU Map7	2,0,0,0,2,0,1,2,0,1,0,2,0,1,1,1,2,0,0,1,2,1,1,2,0,1,1,2,2,1,0,2,2,1,0,0,1,2,0,0,2,0,1,1,0,2,2,1,0,2,1,0,2,1,0,2,1,0,0,0,0,2,2,0,0,0,0,0,2,1,1,2,0,1,0,0,0,0,0,0,0,0,0,0,0,0,0,0,0,0,0,0,0,0,0,0,0,0,0,0,0,0,0,0,0,0,0,0,0,0,0,0,0,0,0,0,0,0,0,0,0,0,0,0,0,0,0,0,0,0,0,0,0,0,0,0,0,0,0,0,0,0,0,0,0,0,0,0,0,0,0,0,0,0,0,0,0,0,0,0,0,0,0,0,0,0,0,0,0,0,0,0,0,0,0,0,0,0,0,0,0,0,0,0,0,0,0,0,0,0,0,0,0,0,0,0,0,0,0,0…	MAGIv3.1_92604	MAGIv3.1_92604	chr01	8713207	Consistent
101	TIDP5541	mu	umc1071	chr01	28.3	0	Co-Dominant	TGCE	ISU Map7	2,0,0,0,2,0,1,2,0,1,0,2,0,1,1,1,2,0,0,1,2,1,1,2,0,1,1,2,2,1,2,2,0,1,0,0,1,2,0,0,2,0,1,1,0,2,2,1,0,2,1,0,2,1,0,2,1,0,1,0,0,2,2,0,0,0,0,0,2,1,1,2,0,1,0,0,0,0,0,0,0,0,0,0,0,0,0,0,0,0,0,0,0,0,0,0,0,0,0,0,0,0,0,0,0,0,0,0,0,0,0,0,0,0,0,0,0,0,0,0,0,0,0,0,0,0,0,0,0,0,0,0,0,0,0,0,0,0,0,0,0,0,0,0,0,0,0,0,0,0,0,0,0,0,0,0,0,0,0,0,0,0,0,0,0,0,0,0,0,0,0,0,0,0,0,0,0,0,0,0,0,0,0,0,0,0,0,0,0,0,0,0,0,0,0,0,0,0,0,0…	MAGIv3.1_71007	MAGIv3.1_71007	chr01	8605399	Consistent
102	MAGI_100343	sk	-	chr01	32.6	0	-	SNP	ISU SNP Map	2,1,0,1,2,1,1,2,0,1,2,2,2,1,1,1,2,0,0,1,2,1,1,2,1,1,1,2,2,1,2,2,2,1,0,0,1,2,0,0,2,2,1,1,2,2,2,1,2,2,1,1,2,1,2,2,1,0,0,2,1,2,2,0,1,2,1,0,0,1,1,2,1,1,1,2,0,1,2,2,1,0,1,1,2,1,1,1,1,1,1,2,2,2,1,2,1,1,1,1,1,1,0,2,1,1,2,1,1,0,1,0,2,1,2,2,2,1,0,1,2,2,2,2,0,0,2,2,2,1,2,1,0,2,0,1,1,2,1,0,2,2,2,1,0,2,1,2,1,1,1,0,2,2,2,2,2,0,0,0,1,1,0,1,1,2,1,1,2,0,0,0,1,0,2,2,2,0,1,2,2,2,2,2,1,2,2,1,0,1,1,2,1,1,1,1,1,2,0,2…	MAGIv3.1_100343	MAGIv3.1_100343	chr01	9024125	Consistent
103	IDP7821	mu	MAGI_100343	chr01	32.6	3	Dominant	+/-	ISU Map7	2,1,2,1,2,1,1,1,0,1,2,2,2,1,1,1,2,0,0,1,2,1,1,2,1,1,1,2,2,1,2,2,2,1,0,0,1,2,0,1,2,2,1,1,2,2,2,1,2,2,1,1,2,1,2,2,1,0,0,2,1,2,2,0,1,2,1,1,0,1,1,2,1,1,1,2,0,1,2,2,1,0,1,1,2,1,1,1,1,1,1,2,2,2,1,2,1,1,1,1,1,1,0,2,1,1,2,2,1,0,1,2,2,1,2,2,2,1,0,1,2,2,2,2,0,0,2,2,2,1,2,1,0,2,0,1,1,2,1,0,2,1,2,1,1,2,1,2,1,1,1,0,2,2,2,2,2,0,2,2,2,1,0,1,1,2,1,1,2,0,0,0,1,0,2,2,2,0,1,2,2,2,2,2,1,2,2,1,0,1,1,2,1,1,1,1,1,2,2,2…	MAGIv3.1_6580	MAGIv3.1_6580	chr01	8792694	Consistent
104	IDP7711	mu	MAGI_100343	chr01	32.6	3.7	Dominant	+/-	ISU Map7	2,1,2,1,2,1,1,1,0,1,2,2,2,1,1,1,2,0,0,1,2,1,1,2,1,1,1,2,2,1,2,2,2,1,0,0,1,2,0,1,2,2,1,1,2,2,2,1,2,2,1,1,2,2,2,2,1,0,0,2,1,2,2,0,1,2,1,1,0,1,1,1,1,1,1,2,0,1,2,2,1,0,1,1,2,1,1,1,1,1,1,2,2,2,1,2,1,1,1,1,1,1,0,2,1,1,2,1,1,0,1,2,2,1,2,2,1,1,0,1,2,2,2,2,0,0,2,2,2,1,2,1,0,2,0,1,1,2,1,0,2,2,2,1,1,2,1,2,1,1,1,0,2,2,2,2,2,0,2,2,1,1,0,1,1,2,1,1,2,0,0,0,1,0,2,2,2,0,1,2,2,2,2,2,1,2,2,1,0,1,1,2,1,1,1,1,1,2,2,2…	MAGIv3.1_104955	MAGIv3.1_104955	chr01	9287753	Consistent
105	IDP8588	mu	MAGI_100343	chr01	32.6	2.2	Dominant	+/-	ISU Map7	2,1,2,1,2,1,1,1,0,2,2,2,2,1,1,1,2,0,0,1,2,1,1,2,2,1,1,2,2,1,2,2,2,1,0,0,1,2,0,1,2,2,1,1,2,2,2,1,2,2,1,1,2,2,2,2,1,0,0,2,1,2,2,0,1,2,1,1,0,1,1,1,1,1,1,2,0,1,2,2,1,0,1,1,2,1,1,1,1,1,1,2,2,2,1,2,1,1,1,1,1,1,0,2,2,1,2,1,1,0,1,2,2,1,2,2,1,1,0,1,2,2,2,1,0,0,2,1,2,1,2,1,0,2,0,1,1,2,1,0,2,2,2,1,1,2,1,2,1,1,1,0,2,2,2,2,2,0,2,2,1,1,0,1,1,2,1,1,2,0,0,0,1,0,2,2,2,0,1,2,2,2,1,2,1,2,1,1,0,1,1,1,2,1,1,1,1,2,2,2…	MAGIv3.1_50138	MAGIv3.1_50138	chr01	9414660	Consistent
106	MAGI_16675	sk	-	chr01	34.2	0	-	SNP	ISU SNP Map	2,1,0,1,2,1,1,2,0,1,1,2,2,1,1,1,2,0,0,1,2,1,1,2,1,1,1,2,2,1,2,1,1,1,0,0,1,2,0,0,2,2,1,1,2,2,2,1,2,2,1,1,2,2,2,2,1,0,0,2,1,2,2,0,1,2,1,0,0,1,1,1,1,1,1,2,0,2,2,2,1,0,1,1,2,1,1,1,1,1,1,2,2,2,1,2,1,1,1,1,1,1,0,2,2,1,2,1,1,0,1,2,2,1,2,2,1,2,0,1,2,2,2,2,0,0,2,2,2,1,2,1,0,0,0,1,1,2,1,0,2,2,2,1,0,2,1,2,1,1,1,0,2,2,2,2,2,0,0,0,1,1,0,1,1,2,1,1,2,0,0,0,1,0,2,2,2,0,1,2,2,2,2,2,1,2,2,1,0,1,1,2,2,1,1,1,1,2,2,2…	MAGIv3.1_16675	MAGIv3.1_16675	chr01	9555413	Consistent
107	IDP1437	mu	MAGI_16675	chr01	34.2	0.4	Dominant	+/-	ISU Map7	2,0,0,0,2,0,1,2,0,1,0,2,0,1,1,1,2,0,0,1,2,1,1,2,0,1,1,2,2,1,2,1,1,1,0,0,1,2,0,0,2,0,1,1,0,2,2,1,0,2,1,0,2,2,0,2,1,0,1,0,0,2,2,0,0,0,0,0,2,1,1,1,0,1,0,0,0,0,0,0,0,0,0,0,0,0,0,0,0,0,0,0,0,0,0,0,0,0,0,0,0,0,0,0,0,0,0,0,0,0,0,0,0,0,0,0,0,0,0,0,0,0,0,0,0,0,0,0,0,0,0,0,0,0,0,0,0,0,0,0,0,0,0,0,0,0,0,0,0,0,0,0,0,0,0,0,0,0,0,0,0,0,0,0,0,0,0,0,0,0,0,0,0,0,0,0,0,0,0,0,0,0,0,0,0,0,0,0,0,0,0,0,0,0,0,0,0,0,0,0…	MAGIv4.0_29622	-	-	-	-
108	TIDP3216	mu	MAGI_16675	chr01	34.2	0.4	Co-Dominant	TGCE	ISU Map7	2,0,0,0,2,0,1,2,0,1,0,2,0,1,1,1,2,0,0,1,2,1,1,2,0,1,1,2,2,1,2,1,2,0,0,0,1,2,0,0,2,0,1,1,0,2,2,1,0,2,1,0,2,2,0,2,1,0,1,0,0,2,2,0,0,0,0,0,2,1,1,0,0,1,0,0,0,0,0,0,0,0,0,0,0,0,0,0,0,0,0,0,0,0,0,0,0,0,0,0,0,0,0,0,0,0,0,0,0,0,0,0,0,0,0,0,0,0,0,0,0,0,0,0,0,0,0,0,0,0,0,0,0,0,0,0,0,0,0,0,0,0,0,0,0,0,0,0,0,0,0,0,0,0,0,0,0,0,0,0,0,0,0,0,0,0,0,0,0,0,0,0,0,0,0,0,0,0,0,0,0,0,0,0,0,0,0,0,0,0,0,0,0,0,0,0,0,0,0,0…	MAGIv3.1_83894	MAGIv3.1_83894	chr01	9418735	Consistent
109	TIDP4603	mu	MAGI_16675	chr01	34.2	1.8	Co-Dominant	TGCE	ISU Map7	2,0,0,0,2,0,1,2,0,1,0,2,0,1,1,1,2,0,0,1,2,1,1,2,0,1,1,2,2,1,2,2,2,1,0,0,1,2,0,0,2,0,1,1,0,2,2,1,0,2,1,0,2,2,0,2,1,0,1,0,0,2,2,0,0,0,0,0,2,1,1,1,0,1,0,0,0,0,0,0,0,0,0,0,0,0,0,0,0,0,0,0,0,0,0,0,0,0,0,0,0,0,0,0,0,0,0,0,0,0,0,0,0,0,0,0,0,0,0,0,0,0,0,0,0,0,0,0,0,0,0,0,0,0,0,0,0,0,0,0,0,0,0,0,0,0,0,0,0,0,0,0,0,0,0,0,0,0,0,0,0,0,0,0,0,0,0,0,0,0,0,0,0,0,0,0,0,0,0,0,0,0,0,0,0,0,0,0,0,0,0,0,0,0,0,0,0,0,0,0…	MAGIv3.1_83894	MAGIv3.1_83894	chr01	9418735	Consistent
110	IDP8218	mu	MAGI_16675	chr01	34.2	0	Dominant	+/-	ISU Map7	2,0,0,0,2,0,1,2,0,1,0,2,0,1,1,1,2,0,0,1,2,1,1,2,0,1,1,2,2,1,2,2,2,1,0,0,1,2,0,0,2,0,1,1,0,2,2,1,0,2,1,0,2,2,0,2,1,0,1,0,0,2,2,0,0,0,0,0,2,1,1,1,0,1,0,0,0,0,0,0,0,0,0,0,0,0,0,0,0,0,0,0,0,0,0,0,0,0,0,0,0,0,0,0,0,0,0,0,0,0,0,0,0,0,0,0,0,0,0,0,0,0,0,0,0,0,0,0,0,0,0,0,0,0,0,0,0,0,0,0,0,0,0,0,0,0,0,0,0,0,0,0,0,0,0,0,0,0,0,0,0,0,0,0,0,0,0,0,0,0,0,0,0,0,0,0,0,0,0,0,0,0,0,0,0,0,0,0,0,0,0,0,0,0,0,0,0,0,0,0…	MAGIv3.1_73614	-	-	-	-
111	IDP5930	mu	MAGI_16675	chr01	34.2	0.8	Dominant	+/-	ISU Map7	2,1,2,1,2,1,1,1,0,1,1,2,2,1,1,1,2,0,0,1,2,1,1,1,2,1,1,2,2,1,2,1,1,1,0,0,1,2,0,1,2,2,1,1,2,2,2,1,2,2,1,1,2,2,2,2,1,0,0,2,1,2,2,0,1,2,1,1,0,1,1,1,1,1,1,2,0,2,2,2,1,0,1,1,2,1,1,1,1,1,1,2,2,2,1,2,1,1,1,1,1,1,0,2,2,1,2,1,1,0,1,2,2,1,2,2,1,2,0,1,2,2,2,2,0,0,2,2,2,1,2,1,0,2,0,1,1,2,1,0,2,2,2,1,1,2,1,2,1,1,1,0,2,2,2,2,2,0,2,2,1,1,0,1,1,2,1,1,2,0,0,0,1,0,2,2,2,0,1,2,2,2,2,2,1,2,2,1,0,1,1,2,2,1,1,1,1,2,2,2…	MAGIv3.1_85129	MAGIv3.1_85129	chr01	9473388	Consistent
112	IDP8174	sk	-	chr01	35	0	Dominant	+/-	ISU Map7	2,1,2,1,2,1,1,1,0,1,1,2,2,1,1,1,2,0,0,1,2,1,1,2,1,1,1,2,2,1,2,1,1,1,0,0,1,2,0,1,1,2,1,1,2,2,2,1,2,2,1,1,2,2,2,2,1,0,0,2,1,2,2,0,1,2,1,1,0,1,1,1,1,1,1,2,0,2,2,2,1,0,1,1,2,1,1,1,1,1,1,2,2,2,1,2,1,1,1,1,1,1,0,2,2,1,2,1,1,0,1,2,2,1,2,2,1,2,0,1,2,2,2,2,0,0,2,2,2,1,2,1,0,2,0,1,1,2,1,0,2,2,2,1,1,1,1,2,2,1,1,0,2,2,2,2,2,0,0,0,1,1,0,1,1,2,1,1,2,0,0,0,1,0,2,2,2,0,1,2,2,2,2,2,1,2,2,1,0,1,1,2,2,1,1,1,1,2,2,2…	MAGIv3.1_65622	MAGIv3.1_65622	chr01	9777150	Consistent
113	IDP847	mu	IDP8174	chr01	35	5.8	Dominant	+/-	ISU Map7	2,1,2,1,2,1,1,1,0,1,1,2,2,1,1,1,2,0,0,1,2,2,1,2,1,1,1,2,1,1,2,1,1,2,0,0,1,2,0,1,1,2,1,1,2,2,2,1,2,2,1,1,2,2,2,2,1,0,0,2,1,2,2,0,1,2,1,2,0,1,1,1,1,1,1,2,0,2,2,1,2,0,2,1,2,2,1,1,1,1,1,2,2,2,2,2,1,1,1,1,1,1,0,2,2,1,2,1,1,0,1,2,2,1,2,2,1,2,0,1,2,2,2,2,0,0,2,2,2,2,2,1,0,2,0,1,1,2,1,0,2,1,2,1,1,1,1,2,2,1,1,0,2,2,2,2,1,0,2,2,1,1,0,1,1,2,1,1,2,0,0,0,1,0,2,2,2,0,1,2,2,2,2,2,1,2,2,1,0,1,1,2,2,1,1,1,1,2,2,2…	MEC_12205_P95-Mar06	MEC_12205_P95-Mar06	chr01	10061875	Consistent
114	gnp_AI979732	mu	IDP8174	chr01	35	1.7	-	-	Genoplante Map	1,0,0,0,2,0,1,1,0,1,0,2,0,1,1,1,2,0,0,1,2,1,1,2,0,1,1,2,2,1,2,1,0,1,0,0,1,0,0,0,0,0,1,1,0,0,2,1,0,2,1,0,0,0,0,2,1,0,0,0,0,2,2,0,0,0,0,0,2,1,0,1,0,0,0,0,0,0,0,0,0,0,0,0,0,0,0,0,0,0,0,0,0,0,0,0,0,0,0,0,0,0,0,0,0,0,0,0,0,0,0,0,0,0,0,0,0,0,0,0,0,0,0,0,0,0,0,0,0,0,0,0,0,0,0,0,0,0,0,0,0,0,0,0,0,0,0,0,0,0,0,0,0,0,0,0,0,0,0,0,0,0,0,0,0,0,0,0,0,0,0,0,0,0,0,0,0,0,0,0,0,0,0,0,0,0,0,0,0,0,0,0,0,0,0,0,0,0,0,0…	AI979732	-	-	-	-
115	MAGI_22160	sk	-	chr01	35.8	0	-	SNP	ISU SNP Map	0,1,0,1,0,1,1,2,0,1,1,2,2,1,1,1,2,0,0,1,2,1,1,2,1,1,1,2,2,1,2,1,1,1,0,0,1,2,0,0,1,2,1,1,2,2,2,1,2,2,1,1,2,2,2,2,1,0,0,2,1,2,2,0,1,2,1,0,0,1,1,1,1,1,1,2,0,2,2,2,1,0,2,1,2,2,1,1,1,1,1,2,2,2,2,2,1,1,1,1,1,1,0,2,2,1,2,1,1,0,1,0,2,1,2,2,1,2,0,1,2,2,2,2,0,0,2,2,2,2,2,1,0,2,0,1,1,2,1,0,2,2,2,1,0,1,1,2,2,1,1,0,2,2,2,2,2,0,0,0,1,1,0,1,1,2,1,1,0,0,0,0,1,0,2,2,2,0,1,2,2,2,2,2,1,2,2,1,0,1,1,2,2,1,1,1,1,2,2,2…	MAGIv3.1_22160	-	-	-	-
116	MAGI_65958	mu	MAGI_22160	chr01	35.8	0.7	-	SNP	ISU SNP Map	2,1,0,1,2,1,1,2,0,1,1,2,2,1,1,1,2,0,0,1,0,0,1,2,1,1,1,2,1,1,2,1,1,1,0,0,1,2,0,0,1,2,1,1,2,2,2,1,2,2,0,1,2,2,2,2,1,0,0,2,1,2,2,0,1,2,1,0,0,0,1,1,1,1,1,0,0,2,2,2,1,0,1,1,2,1,1,1,1,1,1,2,2,2,1,2,1,1,1,1,1,1,0,2,2,1,2,1,1,0,1,2,2,1,2,2,1,2,0,1,2,2,0,2,0,0,2,2,2,2,2,1,0,2,0,1,1,2,1,0,2,1,2,1,0,1,1,2,2,1,1,0,2,2,0,2,2,0,0,0,1,1,0,1,1,2,1,1,2,0,0,0,1,0,2,2,2,0,1,2,2,2,2,2,1,2,2,1,0,1,1,2,2,1,1,1,1,2,2,2…	MAGIv3.1_65958	MAGIv3.1_65958	chr01	9963843	Consistent
117	MAGI_46182	mu	MAGI_22160	chr01	35.8	1.6	-	SNP	ISU SNP Map	2,1,0,1,2,1,1,2,0,1,1,2,2,1,1,1,2,0,0,1,2,1,1,2,1,1,1,2,1,1,2,1,1,2,0,0,1,2,0,0,1,2,1,1,2,2,2,1,2,2,1,1,2,2,2,2,1,0,0,2,1,2,2,0,1,2,1,0,0,1,1,1,1,1,1,2,0,2,2,1,1,0,2,1,2,2,1,1,1,1,1,2,2,2,2,2,1,1,1,1,1,1,0,2,2,1,2,1,1,0,1,2,2,1,2,2,1,2,0,1,2,2,2,2,0,0,2,2,2,2,2,1,0,2,0,1,1,2,1,0,2,1,2,1,0,0,1,2,2,1,1,0,2,2,2,2,2,0,0,0,1,1,0,1,0,2,1,1,2,0,0,0,1,0,2,2,2,0,1,2,2,2,2,2,1,2,2,1,0,1,1,2,2,1,1,1,1,2,2,2…	MAGIv3.1_46182	MAGIv3.1_46182	chr01	10068871	Consistent
118	php20689	mu	MAGI_22160	chr01	35.8	1	-	-	MMP	0,0,0,0,0,0,0,0,0,0,0,0,0,0,0,0,0,0,0,0,1,1,1,2,1,1,1,2,1,1,2,1,1,1,2,2,1,2,2,2,1,2,1,1,2,2,2,1,0,2,0,1,2,2,2,2,1,1,1,0,0,2,2,2,0,0,1,0,2,1,1,1,0,1,1,2,2,2,0,1,1,1,2,1,2,2,1,1,1,1,1,2,0,2,2,0,0,1,1,0,0,0,1,0,0,1,1,0,0,0,0,0,0,0,1,2,1,2,0,0,2,0,2,2,0,0,2,1,2,2,0,1,1,2,2,0,1,2,1,2,2,0,1,2,1,1,0,2,2,0,1,2,2,0,2,2,2,1,1,2,0,1,1,1,2,0,0,1,2,1,2,1,1,1,2,2,2,2,1,2,2,2,2,2,1,2,1,1,2,0,1,2,2,1,1,1,0,2,2,2…	-	-	-	-	-
119	mmp93	mu	MAGI_22160	chr01	35.8	0.2	-	-	MMP	2,0,1,0,2,0,1,2,2,1,1,2,0,1,1,1,2,1,1,0,2,1,1,2,0,1,1,0,1,0,0,1,1,1,2,2,1,2,2,2,1,2,1,1,0,2,2,1,0,2,1,1,0,2,2,2,1,1,1,0,0,2,2,2,0,0,1,0,2,1,1,1,0,1,1,2,2,2,0,1,0,1,2,1,2,0,1,1,1,1,1,2,0,2,2,0,0,1,1,0,1,1,2,0,1,1,2,0,1,2,1,0,0,1,0,2,0,0,2,0,2,1,0,0,1,0,2,1,2,2,0,1,1,2,2,0,1,2,1,2,2,0,2,1,1,0,0,2,2,0,1,2,2,0,2,2,2,1,1,2,0,1,1,1,2,0,0,1,2,1,2,1,1,1,2,2,2,2,1,2,2,2,2,2,1,2,1,1,2,0,1,1,2,1,1,1,0,2,2,2…	AZ916508	-	-	-	-
120	umc1685	mu	MAGI_22160	chr01	35.8	1.1	-	-	MMP	2,0,1,0,2,0,1,2,2,1,1,2,2,1,1,1,2,1,1,1,2,1,1,2,1,1,1,2,1,1,2,1,1,0,2,2,1,2,2,2,1,2,1,1,2,2,2,1,0,2,1,1,2,2,2,2,1,1,1,0,0,2,2,2,0,0,1,0,2,1,1,1,0,1,1,2,2,2,0,1,1,1,2,1,2,2,1,1,1,1,1,2,0,2,2,0,0,1,1,0,1,1,2,2,0,1,2,0,1,2,1,1,0,1,2,2,1,2,2,1,2,0,2,1,1,1,2,1,2,2,0,1,1,2,2,0,1,2,1,2,2,0,2,1,1,0,0,2,2,0,1,2,2,0,2,2,2,1,1,2,0,1,1,1,2,0,0,1,2,1,2,1,1,1,2,2,2,2,1,2,2,2,2,2,1,2,1,1,2,0,1,1,2,1,1,1,0,2,2,2…	CC146736,CC146735	CC146736	chr01	10350992	Consistent
121	MAGI_28823	sk	-	chr01	36.2	0	-	SNP	ISU SNP Map	2,1,0,1,2,1,1,2,0,1,0,2,2,1,1,1,2,0,0,1,2,1,1,2,1,1,1,2,1,1,2,1,1,1,0,0,1,2,0,0,1,2,1,1,2,2,2,1,2,2,1,1,2,2,2,2,1,0,0,2,1,2,2,0,1,2,0,0,0,1,1,1,1,1,1,2,0,2,2,1,1,0,2,1,2,2,1,1,1,1,1,2,2,0,2,2,1,1,1,1,1,1,0,2,2,1,2,1,1,0,1,0,2,1,2,2,1,2,0,1,0,2,2,2,0,0,2,2,2,2,2,1,0,2,0,1,1,2,1,0,2,1,2,1,0,1,1,2,2,0,1,0,2,2,2,2,2,0,0,0,1,1,0,1,1,2,1,1,2,0,0,0,1,0,2,2,2,0,1,2,2,2,2,0,1,2,2,1,0,1,1,2,2,1,1,1,1,2,2,2…	MAGIv3.1_28823	MAGIv3.1_28823	chr01	10063269	Consistent
122	IDP4009	sk	-	chr01	39.3	0	Co-Dominant	Size	ISU Map7	2,1,0,1,2,1,1,1,0,1,2,1,2,1,1,1,2,0,0,1,2,1,1,2,1,2,1,2,1,1,2,1,1,2,0,0,1,2,0,1,1,2,1,1,2,2,2,1,2,2,1,1,2,2,2,2,1,0,0,2,1,2,1,0,1,2,1,1,0,1,1,1,1,1,1,2,0,2,1,1,1,0,2,1,2,1,1,1,1,1,1,2,2,2,2,2,1,1,1,1,1,1,0,2,2,1,2,1,1,0,1,2,2,1,2,2,1,2,0,1,2,1,2,1,0,0,2,2,2,2,0,1,0,2,0,1,1,2,2,0,2,1,2,1,0,0,1,2,2,1,1,0,2,2,2,2,1,0,0,0,1,1,0,1,1,1,1,1,2,0,0,0,1,0,2,0,2,0,1,2,2,2,2,2,1,2,2,1,0,1,1,2,2,1,1,1,1,2,2,2…	MAGIv3.1_84608	MAGIv3.1_84608	chr01	11449760	Consistent
123	TIDP8778	mu	IDP4009	chr01	39.3	0.4	Co-Dominant	TGCE	ISU Map7	2,0,0,0,2,0,1,2,0,1,0,1,0,1,1,1,2,0,0,1,2,1,1,2,0,2,1,2,1,1,2,1,1,2,0,0,1,2,0,0,1,0,1,1,0,2,2,1,0,2,1,0,2,2,0,2,1,0,1,0,0,2,1,0,0,0,0,0,1,1,1,0,0,1,0,0,0,0,0,0,0,0,0,0,0,0,0,0,0,0,0,0,0,0,0,0,0,0,0,0,0,0,0,0,0,0,0,0,0,0,0,0,0,0,0,0,0,0,0,0,0,0,0,0,0,0,0,0,0,0,0,0,0,0,0,0,0,0,0,0,0,0,0,0,0,0,0,0,0,0,0,0,0,0,0,0,0,0,0,0,0,0,0,0,0,0,0,0,0,0,0,0,0,0,0,0,0,0,0,0,0,0,0,0,0,0,0,0,0,0,0,0,0,0,0,0,0,0,0,0…	MAGIv3.1_73515	MAGIv3.1_73515	chr01	11364770	Consistent
124	umc1160	mu	IDP4009	chr01	39.3	0	-	-	MMP	2,0,1,0,2,0,1,2,1,1,0,1,2,1,1,1,2,1,1,1,2,1,1,2,1,2,1,2,1,1,2,1,1,2,2,2,1,2,2,2,1,2,1,1,2,2,2,1,0,2,1,1,2,2,2,0,1,1,1,0,0,2,1,2,0,0,1,0,1,1,1,1,0,1,1,2,2,2,0,1,1,1,2,1,2,0,1,1,1,1,1,2,0,2,2,0,0,1,1,0,1,1,2,2,0,1,2,0,1,1,1,1,0,1,2,2,1,2,2,1,2,1,2,1,1,2,2,2,2,2,0,1,1,2,2,0,1,2,2,2,2,0,2,1,1,0,0,2,2,0,1,2,2,0,2,2,1,1,1,2,0,1,1,1,2,1,0,1,2,1,1,1,1,1,2,1,2,2,1,2,2,2,2,2,1,2,1,1,2,0,1,1,2,1,1,1,0,2,2,2…	AI586523	AI586523	chr01	11657999	Consistent
125	IDP1477	mu	IDP4009	chr01	39.3	0.7	Dominant	-/+	ISU Map7	2,0,0,0,2,0,1,2,0,1,0,1,0,1,1,1,2,0,0,1,2,1,1,2,0,2,1,2,1,1,2,1,1,2,0,0,1,2,0,0,1,0,1,1,0,2,2,1,0,2,1,0,2,2,0,2,1,0,1,0,0,2,1,0,0,0,0,0,1,1,1,1,0,1,0,0,0,0,0,0,0,0,0,0,0,0,0,0,0,0,0,0,0,0,0,0,0,0,0,0,0,0,0,0,0,0,0,0,0,0,0,0,0,0,0,0,0,0,0,0,0,0,0,0,0,0,0,0,0,0,0,0,0,0,0,0,0,0,0,0,0,0,0,0,0,0,0,0,0,0,0,0,0,0,0,0,0,0,0,0,0,0,0,0,0,0,0,0,0,0,0,0,0,0,0,0,0,0,0,0,0,0,0,0,0,0,0,0,0,0,0,0,0,0,0,0,0,0,0,0…	MEC_77741_P95-Mar06	MEC_77741_P95-Mar06	chr01	11371623	Consistent
126	gnp_QBP6f02b	mu	IDP4009	chr01	39.3	0	-	-	Genoplante Map	2,0,0,0,2,0,1,2,0,1,0,1,0,1,1,1,2,0,0,1,2,1,1,2,0,2,1,2,1,1,2,1,1,2,0,0,1,0,0,0,0,0,1,1,0,0,2,1,0,2,1,0,0,2,0,2,1,0,0,0,0,2,1,0,0,0,0,0,1,1,0,1,0,0,0,0,0,0,0,0,0,0,0,0,0,0,0,0,0,0,0,0,0,0,0,0,0,0,0,0,0,0,0,0,0,0,0,0,0,0,0,0,0,0,0,0,0,0,0,0,0,0,0,0,0,0,0,0,0,0,0,0,0,0,0,0,0,0,0,0,0,0,0,0,0,0,0,0,0,0,0,0,0,0,0,0,0,0,0,0,0,0,0,0,0,0,0,0,0,0,0,0,0,0,0,0,0,0,0,0,0,0,0,0,0,0,0,0,0,0,0,0,0,0,0,0,0,0,0,0…	CF021879	CF021879	chr01	11371265	Consistent
127	TIDP4650	mu	IDP4009	chr01	39.3	0	Co-Dominant	TGCE	ISU Map7	2,0,0,0,2,0,1,2,0,1,0,1,0,1,1,1,2,0,0,1,2,1,1,2,0,2,1,2,1,1,0,1,1,2,0,0,1,2,0,0,1,0,1,1,0,2,2,1,0,2,1,0,2,2,0,2,1,0,0,0,0,2,1,0,0,0,0,0,1,1,1,0,0,1,0,0,0,0,0,0,0,0,0,0,0,0,0,0,0,0,0,0,0,0,0,0,0,0,0,0,0,0,0,0,0,0,0,0,0,0,0,0,0,0,0,0,0,0,0,0,0,0,0,0,0,0,0,0,0,0,0,0,0,0,0,0,0,0,0,0,0,0,0,0,0,0,0,0,0,0,0,0,0,0,0,0,0,0,0,0,0,0,0,0,0,0,0,0,0,0,0,0,0,0,0,0,0,0,0,0,0,0,0,0,0,0,0,0,0,0,0,0,0,0,0,0,0,0,0,0…	MAGIv4.0_63964	MAGIv4.0_63964	chr01	11365039	Consistent
128	MAGI_106784	mu	IDP4009	chr01	39.3	0.5	-	SNP	ISU SNP Map	2,1,0,1,2,1,1,2,0,1,2,1,2,1,1,1,2,0,0,1,2,1,1,2,1,2,1,2,1,1,2,1,1,2,0,0,1,2,0,0,1,2,1,1,2,2,2,1,2,2,1,1,2,2,2,2,1,0,0,2,1,2,1,0,1,2,1,0,0,1,1,1,1,1,1,2,0,2,1,1,1,0,2,1,2,1,1,1,1,1,1,2,2,2,2,2,1,1,1,1,1,1,0,2,2,1,2,1,1,0,1,2,2,1,2,2,1,2,0,1,2,1,2,1,0,0,2,2,2,2,1,1,0,2,0,1,1,2,2,0,2,1,2,1,0,0,1,2,2,1,1,0,2,2,2,2,1,0,0,0,1,1,0,1,1,1,1,1,2,0,0,0,1,0,2,2,2,0,1,2,2,2,2,2,1,2,2,1,0,1,1,2,2,1,1,1,1,2,2,2…	MAGIv3.1_106784	MAGIv3.1_106784	chr01	11371672	Consistent
129	MAGI_50074	mu	IDP4009	chr01	39.3	0	-	SNP	ISU SNP Map	2,1,0,1,2,1,1,2,0,1,2,1,2,1,1,1,2,0,0,1,2,1,1,2,1,2,1,2,1,1,2,1,1,2,0,0,1,2,0,0,1,0,1,1,2,2,2,1,2,2,1,1,2,2,2,2,0,0,0,0,1,2,1,0,1,2,1,0,0,1,1,1,1,1,1,2,0,2,1,1,1,0,2,1,2,1,1,1,1,1,1,2,2,2,2,2,1,1,1,1,1,1,0,2,2,1,2,1,1,0,1,0,2,1,2,2,1,2,0,1,2,1,2,1,0,0,2,0,2,2,1,1,0,2,0,1,1,2,2,0,2,1,2,1,0,0,1,2,2,1,1,0,2,2,2,2,1,0,0,0,1,0,0,1,1,1,1,1,2,0,0,0,1,0,2,2,2,0,1,2,2,2,2,2,1,2,2,1,0,1,1,2,2,1,1,1,1,2,2,2…	MAGIv3.1_50074	MAGIv3.1_50074	chr01	11370008	Consistent
130	IDP3928	mu	IDP4009	chr01	39.3	1.2	Dominant	+/-	ISU Map7	2,1,0,1,2,1,1,1,0,1,2,1,2,1,1,1,2,0,0,1,2,1,1,2,1,2,1,2,1,1,2,1,1,2,0,0,1,2,0,1,1,2,1,1,2,2,2,1,2,2,1,1,2,2,2,2,1,0,0,2,1,2,1,0,1,2,1,1,0,1,1,1,1,1,1,2,0,2,1,1,1,0,2,1,2,1,1,1,1,1,1,2,2,2,2,2,1,1,1,1,1,1,0,2,2,1,2,1,1,0,2,2,2,1,2,2,1,2,0,1,2,1,2,1,0,0,2,2,2,2,1,1,0,2,0,1,1,2,2,0,2,1,2,1,1,1,1,2,2,1,1,0,2,2,2,2,1,0,0,0,1,1,0,1,1,1,1,1,2,0,0,0,1,0,2,1,2,0,1,2,2,2,2,2,1,2,2,1,0,1,1,2,2,1,1,1,1,2,2,2…	MAGIv2.31_24818	MAGIv2.31_24818	chr09	148357319	Inconsistent
131	gnp_QCB11g08	mu	IDP4009	chr01	39.3	0.5	-	-	Genoplante Map	0,0,0,0,2,0,1,2,0,1,0,1,0,1,1,1,2,0,0,1,2,1,1,2,0,2,0,2,1,1,2,1,2,2,0,0,1,0,0,0,0,0,1,1,0,0,2,1,0,2,1,0,0,2,0,2,1,0,0,0,0,2,1,0,0,0,0,0,2,1,0,1,0,0,0,0,0,0,0,0,0,0,0,0,0,0,0,0,0,0,0,0,0,0,0,0,0,0,0,0,0,0,0,0,0,0,0,0,0,0,0,0,0,0,0,0,0,0,0,0,0,0,0,0,0,0,0,0,0,0,0,0,0,0,0,0,0,0,0,0,0,0,0,0,0,0,0,0,0,0,0,0,0,0,0,0,0,0,0,0,0,0,0,0,0,0,0,0,0,0,0,0,0,0,0,0,0,0,0,0,0,0,0,0,0,0,0,0,0,0,0,0,0,0,0,0,0,0,0,0…	CF026771	CF026771	chr01	12101392	Consistent
132	MAGI_88130	sk	-	chr01	40.4	0	-	SNP	ISU SNP Map	2,1,0,1,2,1,1,2,0,1,0,1,2,1,1,1,2,0,0,1,2,1,1,2,1,2,1,2,1,1,2,1,2,2,0,0,1,2,0,0,1,2,1,1,2,2,2,1,2,2,1,1,2,2,2,2,1,0,0,2,1,2,1,0,1,2,0,0,0,1,1,1,1,1,1,2,0,2,1,1,1,0,2,1,2,1,1,1,1,1,1,2,2,0,2,2,1,1,1,1,1,1,0,2,2,1,2,1,1,0,1,0,2,1,2,1,1,2,0,1,0,1,2,1,0,0,2,2,2,2,1,1,0,2,0,1,1,2,2,0,2,1,2,1,0,1,1,2,2,0,1,0,2,2,2,2,1,0,0,0,1,1,0,1,1,1,1,1,2,0,0,0,1,0,2,1,2,0,1,2,2,2,2,0,1,2,2,1,0,1,1,2,2,1,1,1,1,2,2,2…	MAGIv3.1_88130	MAGIv3.1_88130	chr01	11949402	Consistent
133	MAGI_61598	mu	MAGI_88130	chr01	40.4	1.2	-	SNP	ISU SNP Map	2,1,0,1,2,1,1,2,0,1,2,1,2,1,1,1,2,0,0,1,2,1,1,2,1,2,2,2,1,1,2,1,2,2,0,0,1,2,0,0,1,2,1,1,2,2,2,1,2,2,1,1,2,2,2,2,1,0,0,2,1,2,1,0,1,2,1,0,0,1,1,1,1,1,1,2,0,2,1,1,1,0,2,1,2,1,1,1,1,1,1,2,2,2,2,2,1,1,1,1,1,1,0,2,2,1,2,1,1,0,1,2,2,1,2,1,1,2,0,2,2,1,2,1,0,0,2,2,2,2,1,1,0,2,0,1,1,2,2,0,2,1,2,1,0,1,1,2,2,1,1,0,2,2,2,2,1,0,0,0,1,1,0,1,1,1,1,1,2,0,0,0,1,0,2,1,2,0,1,2,2,2,2,2,1,2,2,1,0,1,1,2,2,1,1,1,1,2,2,2…	MAGIv3.1_61598	MAGIv3.1_61598	chr01	12124382	Consistent
134	umc2224	mu	MAGI_88130	chr01	40.4	0.9	-	-	MMP	2,0,1,0,2,0,1,2,1,1,0,1,2,1,1,1,2,1,1,1,2,1,1,2,0,2,2,0,1,1,0,1,2,2,2,2,1,2,2,2,1,2,1,1,0,2,2,1,0,2,0,1,0,2,0,0,0,1,1,0,0,2,1,0,0,0,1,0,0,1,1,1,0,1,1,0,2,2,0,1,1,1,2,1,0,0,1,1,1,1,1,2,0,2,2,0,0,1,1,0,1,1,2,2,2,1,2,0,1,1,0,0,0,1,2,1,1,0,2,2,2,0,2,1,0,0,2,2,2,2,0,1,1,0,0,0,0,2,2,2,2,0,2,1,1,0,0,2,2,0,1,2,2,0,2,2,1,1,1,2,0,1,1,1,2,0,0,1,2,1,1,1,1,1,2,1,2,2,1,2,2,2,2,2,1,2,1,1,2,0,1,1,0,0,1,1,0,2,0,2…	BI245232,AC211517	BI245232	chr01	12125420	Consistent
135	npi579b	mu	MAGI_88130	chr01	40.4	0.8	-	-	MMP	2,0,1,0,0,0,1,2,1,1,0,1,2,1,1,1,2,1,1,0,2,1,1,2,1,2,2,2,1,1,2,0,0,2,2,0,0,0,0,0,1,2,1,1,2,2,2,1,0,2,0,1,2,2,2,2,1,1,1,0,0,2,2,2,0,0,0,0,0,1,1,1,0,1,1,2,2,2,0,1,2,1,2,1,0,0,1,1,1,1,1,2,0,2,2,0,0,1,1,0,0,1,2,0,0,1,2,0,0,0,0,0,0,0,1,1,1,2,0,0,2,1,2,1,0,0,2,2,2,2,0,1,0,0,0,0,0,2,0,2,2,0,2,1,1,0,0,2,2,0,1,2,2,0,2,2,1,1,1,2,0,1,1,0,2,0,0,1,2,1,1,0,0,1,0,0,2,2,1,2,2,2,2,2,1,2,0,1,2,0,0,0,2,1,1,1,0,2,2,2…	-	-	-	-	-
136	gnp_QAJ5b05b	mu	MAGI_88130	chr01	40.4	2.5	-	-	Genoplante Map	2,0,0,0,2,0,1,2,0,1,0,1,0,1,1,1,2,0,0,1,2,1,1,2,0,2,2,2,1,1,2,1,2,2,0,0,1,0,0,0,0,0,1,1,0,0,2,1,0,2,1,0,0,2,0,2,1,0,0,0,0,2,2,0,0,0,0,0,1,1,0,1,0,0,0,0,0,0,0,0,0,0,0,0,0,0,0,0,0,0,0,0,0,0,0,0,0,0,0,0,0,0,0,0,0,0,0,0,0,0,0,0,0,0,0,0,0,0,0,0,0,0,0,0,0,0,0,0,0,0,0,0,0,0,0,0,0,0,0,0,0,0,0,0,0,0,0,0,0,0,0,0,0,0,0,0,0,0,0,0,0,0,0,0,0,0,0,0,0,0,0,0,0,0,0,0,0,0,0,0,0,0,0,0,0,0,0,0,0,0,0,0,0,0,0,0,0,0,0,0…	CD981929	-	-	-	-
137	IDP8631	mu	MAGI_88130	chr01	40.4	1.8	Co-Dominant	Size	ISU Map7	2,1,0,1,2,1,1,1,0,1,2,1,2,1,1,1,2,0,0,1,2,1,1,2,1,2,2,2,1,2,2,1,2,2,0,0,1,2,0,1,1,2,2,1,2,2,2,1,2,2,1,1,2,2,2,0,1,0,0,2,1,2,2,0,2,2,1,2,0,1,1,1,1,1,1,2,0,2,2,1,1,0,2,1,2,1,1,1,1,1,1,2,2,2,2,2,1,1,1,1,1,1,0,2,2,0,2,1,1,0,1,2,2,1,2,1,1,2,0,2,2,1,2,1,0,0,2,2,2,2,1,1,0,2,0,1,0,2,2,0,2,1,1,1,2,1,1,2,2,1,1,0,2,2,2,2,1,0,0,0,1,1,0,1,1,1,1,1,2,0,0,0,1,0,2,1,2,0,1,2,2,2,2,1,1,2,1,0,0,1,1,2,2,1,1,1,1,2,2,2…	MAGIv3.1_73140	MAGIv3.1_73140	chr01	12315495	Consistent
138	IDP8388	sk	-	chr01	42.1	0	Co-Dominant	Size	ISU Map7	2,1,0,1,2,1,1,1,0,1,2,1,2,1,1,1,2,0,0,1,2,1,1,2,1,2,2,2,1,1,2,1,2,2,0,0,1,2,0,1,1,2,1,1,2,2,2,1,2,2,1,1,2,2,2,2,1,0,0,2,1,2,2,0,1,2,1,2,0,1,1,1,1,1,1,2,0,2,2,1,2,0,0,1,2,0,1,1,0,1,1,2,2,2,2,2,1,1,1,1,1,1,0,2,2,1,2,1,1,0,1,2,2,1,2,1,1,2,0,2,2,1,2,1,0,0,2,2,2,2,1,1,0,2,0,1,1,2,2,0,2,1,2,1,0,1,1,2,2,1,1,0,2,2,2,2,1,0,0,0,1,1,0,1,1,1,1,1,2,0,0,0,1,0,2,1,2,0,1,2,2,2,2,2,1,2,2,1,0,1,1,2,0,1,2,1,1,2,2,2…	MAGIv3.1_83180	MAGIv3.1_83180	chr01	12148123	Consistent
139	TIDP6160	mu	IDP8388	chr01	42.1	0.8	Co-Dominant	TGCE	ISU Map7	2,0,0,0,2,0,1,2,0,1,0,1,0,1,1,1,2,0,0,1,2,1,1,2,0,2,2,2,1,1,2,1,2,2,0,0,1,2,0,0,1,0,1,1,0,2,2,1,0,2,1,0,2,2,0,2,1,0,1,0,0,2,2,0,0,0,0,0,0,1,1,1,0,1,0,0,0,0,0,0,0,0,0,0,0,0,0,0,0,0,0,0,0,0,0,0,0,0,0,0,0,0,0,0,0,0,0,0,0,0,0,0,0,0,0,0,0,0,0,0,0,0,0,0,0,0,0,0,0,0,0,0,0,0,0,0,0,0,0,0,0,0,0,0,0,0,0,0,0,0,0,0,0,0,0,0,0,0,0,0,0,0,0,0,0,0,0,0,0,0,0,0,0,0,0,0,0,0,0,0,0,0,0,0,0,0,0,0,0,0,0,0,0,0,0,0,0,0,0,0…	MAGIv3.1_48718	MAGIv3.1_48718	chr01	12385625	Consistent
140	gnp_AI622068e	mu	IDP8388	chr01	42.1	2	-	-	Genoplante Map	2,0,0,0,2,0,1,2,0,1,0,1,0,1,1,1,2,0,0,1,2,1,1,2,0,2,2,2,1,1,2,1,2,2,0,0,1,0,0,0,0,0,1,1,0,0,2,1,0,2,1,0,0,2,0,2,1,0,0,0,0,2,2,0,0,0,0,0,2,1,0,1,0,0,0,0,0,0,0,0,0,0,0,0,0,0,0,0,0,0,0,0,0,0,0,0,0,0,0,0,0,0,0,0,0,0,0,0,0,0,0,0,0,0,0,0,0,0,0,0,0,0,0,0,0,0,0,0,0,0,0,0,0,0,0,0,0,0,0,0,0,0,0,0,0,0,0,0,0,0,0,0,0,0,0,0,0,0,0,0,0,0,0,0,0,0,0,0,0,0,0,0,0,0,0,0,0,0,0,0,0,0,0,0,0,0,0,0,0,0,0,0,0,0,0,0,0,0,0,0…	AI622068	AI622068	chr08	79050147	Inconsistent
141	IMR7	sk	-	chr01	45.9	0	Co-Dominant	Size	ISU Map7	2,2,0,2,2,1,1,1,0,1,2,1,2,1,1,1,2,0,0,1,2,1,2,0,1,2,1,2,1,1,1,1,2,2,0,0,1,2,0,1,1,1,1,1,2,2,2,1,2,2,1,1,1,2,2,2,1,0,0,2,1,2,2,0,2,2,1,2,0,2,2,1,1,2,1,2,0,2,2,1,2,0,2,1,2,1,1,1,1,1,1,2,2,2,2,2,1,2,1,1,1,1,0,2,2,1,2,1,1,0,1,2,2,2,2,1,1,2,0,2,2,1,1,1,0,0,2,2,2,2,1,1,0,2,0,1,1,2,2,0,2,1,1,1,1,1,2,2,2,1,1,0,2,2,2,2,1,0,0,0,1,1,0,1,1,1,1,1,2,0,0,0,1,0,2,1,2,0,1,2,2,2,2,2,1,2,1,1,0,1,2,2,1,1,1,1,0,2,2,2…	MAGIv3.1_48532	MAGIv3.1_48532	chr01	13581626	Consistent
142	IDP4934	mu	IMR7	chr01	45.9	1	Dominant	-/+	ISU Map7	2,2,0,2,2,1,1,1,0,1,2,1,2,1,1,1,2,0,0,1,2,1,2,2,1,2,1,2,1,1,1,1,2,2,0,0,1,2,0,1,1,1,1,1,2,2,2,1,2,2,1,1,2,2,2,2,1,0,0,2,1,2,2,0,2,2,1,2,0,2,2,1,1,2,1,2,0,2,2,1,2,0,2,1,2,1,1,1,1,1,1,2,2,2,2,2,1,2,1,1,1,1,0,2,2,1,2,1,1,0,1,2,2,2,2,0,1,2,0,2,2,1,1,1,0,0,2,2,2,2,1,1,0,0,0,1,1,2,2,0,2,1,1,2,2,1,2,2,2,1,1,0,2,2,2,2,1,0,0,0,1,1,0,1,1,1,1,1,2,0,0,0,1,0,2,1,2,0,1,2,2,2,2,2,1,2,1,1,0,1,2,2,1,1,2,1,2,2,2,2…	MAGIv3.1_49306	MAGIv3.1_49306	chr01	13398152	Consistent
143	IDP1461	mu	IMR7	chr01	45.9	0.5	Dominant	+/-	ISU Map7	2,2,2,2,2,1,1,1,0,1,2,1,2,1,1,1,2,0,0,1,2,1,2,2,1,2,1,2,1,1,1,1,2,2,0,0,1,2,0,1,1,1,1,1,2,2,2,1,2,2,1,1,2,2,2,2,1,0,0,2,1,2,2,0,2,2,1,2,0,2,2,1,1,1,1,2,0,2,2,1,2,0,2,1,2,1,1,1,1,1,1,2,2,2,2,2,1,2,1,1,1,1,0,2,2,1,2,1,1,0,1,2,2,2,2,1,1,2,0,2,2,1,1,1,0,0,2,2,2,2,1,1,0,2,0,1,1,2,2,0,2,1,1,1,2,1,2,2,2,1,1,0,2,2,2,2,1,0,0,0,1,1,0,1,1,1,1,1,2,0,0,0,1,0,2,1,2,0,1,2,2,2,1,2,1,2,1,1,0,1,2,2,1,1,1,1,2,2,2,2…	MAGIv3.1_101557	MAGIv3.1_101557	chr01	13010171	Consistent
144	IDP2403	mu	IMR7	chr01	45.9	0.9	Dominant	+/-	ISU Map7	2,2,2,2,2,1,1,1,0,1,2,1,2,1,1,1,2,0,0,1,2,1,2,2,1,2,1,2,1,1,1,1,2,2,0,0,1,2,0,1,1,1,1,1,2,2,2,1,2,2,1,1,2,2,2,2,1,0,0,2,1,2,2,0,2,2,1,2,0,2,2,1,1,1,1,2,0,2,2,1,2,0,2,1,2,1,1,1,1,1,1,2,2,2,2,2,1,2,1,1,1,1,0,2,1,1,2,1,1,0,1,2,2,2,2,1,1,2,0,2,2,1,2,1,0,0,2,2,2,2,1,1,0,2,0,1,1,2,2,0,2,1,1,1,1,1,2,2,2,1,1,0,2,2,2,2,1,0,2,2,1,1,0,1,1,1,1,1,2,0,0,0,1,0,2,1,2,0,1,2,2,2,1,2,1,2,1,1,0,1,2,2,1,1,1,1,2,2,2,2…	MAGIv3.1_2762	MAGIv3.1_2762	chr01	12919074	Consistent
145	MAGI_2762_W23	mu	IMR7	chr01	45.9	0.5	-	SNP	ISU SNP Map	2,2,0,2,2,1,1,2,0,1,2,1,2,1,1,1,2,0,0,1,2,1,2,2,1,2,1,2,1,1,1,1,2,2,0,0,1,2,0,0,1,1,1,1,2,2,2,1,2,2,1,1,2,2,2,2,1,0,0,2,1,2,2,0,0,2,1,0,0,2,2,1,1,1,1,2,0,2,2,1,2,0,2,1,2,1,1,1,1,1,1,2,2,2,2,2,1,2,1,1,1,1,0,2,2,1,2,1,1,0,1,2,2,2,2,1,1,2,0,2,2,1,2,1,0,0,2,2,2,2,1,1,0,2,0,1,1,2,2,0,2,1,1,1,0,1,2,0,2,1,1,0,2,2,2,2,1,0,0,0,1,1,0,1,1,1,1,1,2,0,0,0,1,0,2,1,2,0,1,2,2,2,2,2,1,2,1,1,0,1,2,2,1,1,2,0,2,2,2,2…	MAGIv3.1_2762	MAGIv3.1_2762	chr01	12919074	Consistent
146	MAGI_2762_W42	mu	IMR7	chr01	45.9	0	-	SNP	ISU SNP Map	2,2,0,2,2,1,1,2,0,1,2,1,2,1,1,1,2,0,0,1,2,1,2,2,1,2,1,2,1,1,1,1,2,2,0,0,1,2,0,0,1,1,1,1,2,2,2,1,2,2,1,1,2,2,2,2,1,0,0,2,1,2,2,0,2,2,1,0,0,2,2,1,1,1,1,2,0,2,2,1,2,0,2,1,2,1,1,1,1,1,1,2,2,2,2,2,1,2,1,1,1,1,0,2,2,1,2,1,1,0,1,2,2,2,2,1,1,2,0,2,2,1,2,1,0,0,2,2,2,2,1,1,0,2,0,1,1,2,2,0,2,1,1,1,0,1,2,2,2,1,1,0,2,2,2,2,1,0,0,0,1,1,0,1,1,1,1,1,2,0,0,0,1,0,2,1,2,0,1,2,2,2,2,2,1,2,1,1,0,1,2,2,1,1,2,1,2,2,2,2…	MAGIv3.1_2762	MAGIv3.1_2762	chr01	12919074	Consistent
147	IDP1425	mu	IMR7	chr01	45.9	1.6	Co-Dominant	Size	ISU Map7	2,2,0,2,2,1,1,1,0,1,2,1,2,1,1,1,2,0,0,1,2,1,2,2,1,2,1,2,1,1,2,1,2,2,0,0,1,2,0,1,1,1,1,1,2,2,2,1,0,2,1,1,2,2,2,2,1,0,0,2,1,2,2,0,2,2,1,2,0,2,2,1,1,1,1,2,0,2,2,1,2,0,2,1,2,1,1,1,1,1,1,2,2,2,2,2,1,2,1,1,1,1,0,2,2,1,2,1,1,0,2,2,2,2,2,1,1,2,0,2,2,1,2,1,0,0,2,2,2,2,1,1,0,2,0,1,1,2,2,0,2,1,1,1,0,1,2,2,2,1,1,0,2,2,2,2,1,0,0,0,1,1,0,1,1,1,1,1,2,0,0,0,1,0,2,1,2,0,1,2,2,2,2,2,1,2,1,1,0,1,2,2,1,1,0,1,2,2,2,2…	MEC_11801_P95-Mar06	-	-	-	-
148	gnp_QBP5c05	mu	IMR7	chr01	45.9	2.7	-	-	Genoplante Map	0,0,0,0,2,0,1,2,0,1,0,1,0,1,1,1,2,0,0,1,2,1,1,2,0,2,1,2,1,1,2,1,2,2,0,0,1,0,0,0,0,0,1,1,0,0,2,1,0,2,1,0,0,2,0,2,1,0,0,0,0,2,2,0,0,0,0,0,0,1,0,1,0,0,0,0,0,0,0,0,0,0,0,0,0,0,0,0,0,0,0,0,0,0,0,0,0,0,0,0,0,0,0,0,0,0,0,0,0,0,0,0,0,0,0,0,0,0,0,0,0,0,0,0,0,0,0,0,0,0,0,0,0,0,0,0,0,0,0,0,0,0,0,0,0,0,0,0,0,0,0,0,0,0,0,0,0,0,0,0,0,0,0,0,0,0,0,0,0,0,0,0,0,0,0,0,0,0,0,0,0,0,0,0,0,0,0,0,0,0,0,0,0,0,0,0,0,0,0,0…	CF021788	CF021788	chr01	12476500	Consistent
149	gnp_AW331066c	mu	IMR7	chr01	45.9	4.3	-	-	Genoplante Map	2,0,0,0,2,0,1,2,0,1,0,2,0,1,1,1,2,0,0,1,2,1,2,2,0,2,1,2,1,1,0,1,0,2,0,0,1,0,0,0,0,0,1,1,0,0,2,1,0,2,1,0,0,0,0,2,1,0,0,0,0,2,1,0,0,0,0,0,2,2,0,1,0,0,0,0,0,0,0,0,0,0,0,0,0,0,0,0,0,0,0,0,0,0,0,0,0,0,0,0,0,0,0,0,0,0,0,0,0,0,0,0,0,0,0,0,0,0,0,0,0,0,0,0,0,0,0,0,0,0,0,0,0,0,0,0,0,0,0,0,0,0,0,0,0,0,0,0,0,0,0,0,0,0,0,0,0,0,0,0,0,0,0,0,0,0,0,0,0,0,0,0,0,0,0,0,0,0,0,0,0,0,0,0,0,0,0,0,0,0,0,0,0,0,0,0,0,0,0,0…	AW331066	-	-	-	-
150	bnlg1178	mu	IMR7	chr01	45.9	3.7	-	-	Genoplante Map	2,0,0,0,2,0,1,2,0,1,0,1,0,1,1,1,2,0,0,2,2,1,2,2,0,2,1,2,1,2,1,1,1,2,0,0,1,2,0,0,1,0,1,2,0,2,2,1,0,2,1,0,2,1,0,2,1,0,1,0,0,2,2,0,0,0,0,0,1,1,2,1,0,2,0,0,0,0,0,0,0,0,0,0,0,0,0,0,0,0,0,0,0,0,0,0,0,0,0,0,0,0,0,0,0,0,0,0,0,0,0,0,0,0,0,0,0,0,0,0,0,0,0,0,0,0,0,0,0,0,0,0,0,0,0,0,0,0,0,0,0,0,0,0,0,0,0,0,0,0,0,0,0,0,0,0,0,0,0,0,0,0,0,0,0,0,0,0,0,0,0,0,0,0,0,0,0,0,0,0,0,0,0,0,0,0,0,0,0,0,0,0,0,0,0,0,0,0,0,0…	CC783594,CC757265	-	-	-	-
151	umc2225	mu	IMR7	chr01	45.9	0.7	-	-	MMP	2,0,1,0,2,0,1,2,2,1,2,1,2,1,1,1,0,1,1,1,2,1,2,1,0,2,1,0,1,0,1,1,2,2,2,2,1,2,2,2,1,1,0,2,2,2,2,1,0,2,0,1,0,2,0,2,0,1,1,0,0,2,2,2,0,0,1,0,2,2,2,1,0,0,1,2,2,2,0,1,2,2,2,1,0,1,1,1,1,1,1,2,0,2,2,0,0,2,1,0,1,1,2,2,2,1,2,0,1,1,0,0,0,2,0,1,1,0,2,2,2,1,1,1,0,0,2,2,2,2,0,1,1,0,0,0,0,2,2,2,2,0,0,1,1,0,0,2,2,0,1,2,2,0,2,2,1,1,1,2,0,2,1,1,1,0,0,1,0,1,1,1,1,1,2,1,2,2,1,2,2,2,2,2,1,2,1,1,1,0,1,2,0,0,2,1,0,2,0,2…	CC754185,CC748482,BG841287,CC754186,CC146746	BG841287	chr01	14791367	Consistent
152	mmp68	mu	IMR7	chr01	45.9	0.7	-	-	MMP	2,0,1,0,2,0,1,2,0,1,2,1,0,1,1,1,2,1,1,1,2,1,2,1,0,2,1,2,1,0,1,1,2,2,2,2,1,2,2,2,1,1,1,1,0,2,2,1,0,2,0,1,0,2,2,2,1,1,1,0,0,2,2,2,0,0,1,0,2,2,2,1,0,2,1,2,2,2,0,1,2,2,2,1,2,0,1,1,1,1,1,2,0,2,2,0,0,2,1,0,1,1,2,0,2,1,2,0,1,1,1,0,0,2,0,1,0,0,2,2,2,1,0,1,1,0,2,2,2,2,0,1,1,2,2,0,1,2,2,2,2,0,2,1,1,0,0,2,2,0,1,2,2,0,2,2,1,1,1,2,0,1,1,1,1,1,0,1,2,1,1,1,1,1,2,1,2,0,1,2,2,2,2,2,1,2,1,1,1,0,1,2,1,1,2,1,0,2,2,2…	AZ916449	-	-	-	-
153	TIDP3300	mu	IMR7	chr01	45.9	2.2	Co-Dominant	TGCE	ISU Map7	2,0,0,0,2,0,1,2,0,1,0,1,0,1,1,0,0,0,0,1,2,1,2,1,0,2,1,2,1,1,1,1,2,2,0,0,1,2,0,0,1,0,1,1,0,2,2,1,0,2,1,0,2,2,0,2,1,0,1,0,0,2,2,0,0,0,0,0,0,2,2,1,0,0,0,0,0,0,0,0,0,0,0,0,0,0,0,0,0,0,0,0,0,0,0,0,0,0,0,0,0,0,0,0,0,0,0,0,0,0,0,0,0,0,0,0,0,0,0,0,0,0,0,0,0,0,0,0,0,0,0,0,0,0,0,0,0,0,0,0,0,0,0,0,0,0,0,0,0,0,0,0,0,0,0,0,0,0,0,0,0,0,0,0,0,0,0,0,0,0,0,0,0,0,0,0,0,0,0,0,0,0,0,0,0,0,0,0,0,0,0,0,0,0,0,0,0,0,0,0…	MEC_75391_P95-Mar06	-	-	-	-
154	IDP4914	mu	IMR7	chr01	45.9	1.4	Dominant	+/-	ISU Map7	2,2,2,2,2,1,1,1,0,1,2,1,2,1,1,1,2,0,0,1,2,1,2,2,1,2,1,2,1,1,1,1,2,2,0,0,1,2,0,1,1,1,1,2,2,2,2,1,2,2,1,1,2,2,2,2,1,0,0,1,1,2,2,0,2,2,1,1,0,2,2,1,1,2,1,2,0,2,2,1,2,0,2,1,2,1,1,1,1,1,1,2,2,2,2,2,1,2,1,1,1,1,0,2,1,1,2,1,1,0,1,2,2,2,2,1,1,2,0,2,2,1,1,1,0,0,2,2,2,2,1,1,0,2,0,1,1,2,2,0,0,2,1,1,1,2,1,2,2,2,1,0,1,2,2,2,1,0,2,2,1,1,0,1,1,1,1,1,2,0,0,0,1,0,2,1,2,0,1,2,2,2,1,2,1,2,1,1,0,2,2,2,1,1,1,1,2,2,2,2…	MAGIv3.1_45637	MAGIv3.1_45637	chr01	14868194	Consistent
155	IDP7956	mu	IMR7	chr01	45.9	2.3	Dominant	+/-	ISU Map7	2,2,0,2,2,1,1,1,0,1,2,1,2,1,1,1,2,0,0,1,2,1,2,1,2,2,1,2,1,1,1,1,2,2,0,0,1,2,0,1,1,1,1,2,2,2,2,1,2,2,1,1,2,2,2,2,1,0,0,2,1,2,2,0,2,2,1,1,0,2,2,1,1,2,1,2,0,2,2,1,2,0,2,1,2,1,1,1,1,1,1,2,2,2,2,2,1,2,1,1,1,2,0,2,2,1,2,1,1,0,1,2,2,2,2,1,1,2,0,2,2,1,1,1,0,0,2,2,2,2,1,1,0,2,0,1,1,2,2,0,2,1,1,1,2,1,2,2,2,1,1,0,2,2,2,2,1,0,0,0,1,1,0,1,1,1,1,1,2,0,0,0,1,0,2,1,2,0,1,2,2,2,1,2,1,2,1,1,0,2,2,2,1,1,1,1,2,2,2,2…	MAGIv3.1_20072	MAGIv3.1_20072	chr01	14393572	Consistent
156	IDP4117	mu	IMR7	chr01	45.9	2.6	Dominant	+/-	ISU Map7	2,2,0,2,2,1,1,2,0,1,2,1,2,1,1,1,2,0,0,1,2,1,2,1,2,1,1,2,1,1,1,1,2,2,0,0,1,2,0,1,1,1,1,2,2,2,2,1,2,2,1,1,2,2,2,2,1,0,0,2,1,2,2,0,2,2,1,1,0,2,2,1,1,2,1,2,0,2,2,1,2,0,2,1,2,1,1,1,1,1,1,2,2,2,2,2,1,2,1,1,1,1,0,2,2,1,2,1,1,0,1,2,2,2,2,0,2,2,0,2,2,1,1,1,0,0,2,2,2,2,0,1,0,2,0,1,1,2,2,0,2,1,1,1,2,1,2,2,2,2,1,0,2,2,2,2,1,0,0,0,1,1,0,1,1,1,1,1,2,0,0,0,1,0,2,1,2,0,1,2,2,2,0,2,1,2,1,1,0,2,2,2,1,1,2,1,2,2,2,2…	MAGIv3.1_30264	MAGIv3.1_30264	chr10	128864088	Inconsistent
157	MAGI_41011	mu	IMR7	chr01	45.9	0.3	-	SNP	ISU SNP Map	2,2,0,2,2,1,1,2,0,1,2,1,2,1,1,1,2,0,0,1,2,1,2,1,1,2,1,2,1,1,1,1,2,2,0,0,1,2,0,0,1,1,1,1,2,2,2,1,2,2,1,1,2,2,2,2,1,0,0,2,1,2,2,0,2,2,1,0,0,2,2,1,1,2,1,2,0,2,2,1,2,0,2,1,2,1,1,1,1,1,1,2,2,2,2,2,1,2,1,1,1,1,0,2,2,1,2,1,1,0,1,2,2,2,2,1,1,2,0,2,2,1,1,1,0,0,2,2,2,2,1,1,0,2,0,0,0,2,2,0,0,1,1,1,0,1,2,2,2,1,1,0,2,2,2,2,1,0,0,0,1,1,0,1,0,1,1,1,2,0,0,0,1,0,2,1,2,0,1,2,2,2,2,2,1,2,1,1,0,1,2,2,1,1,2,1,2,2,2,2…	MAGIv3.1_41011	MAGIv3.1_41011	chr01	14045383	Consistent
158	IDP7478	sk	-	chr01	46.6	0	Co-Dominant	Size	ISU Map7	2,2,0,2,2,1,1,2,0,0,2,1,2,1,1,1,2,0,0,1,2,1,2,1,1,2,1,2,1,1,1,1,2,2,0,0,1,2,0,1,1,1,1,1,2,2,2,1,2,2,1,1,2,0,2,2,1,0,0,2,1,2,2,0,2,2,1,2,0,2,2,1,1,2,1,2,0,2,2,1,2,0,2,1,2,1,1,1,1,1,1,2,2,2,2,2,1,2,1,1,1,1,0,2,2,1,2,1,1,0,1,2,2,2,2,1,1,2,0,2,2,1,1,1,0,0,2,2,2,2,1,1,0,2,0,1,1,2,2,0,2,1,1,1,2,1,2,2,2,1,1,0,2,2,0,2,1,0,0,0,1,1,0,1,1,1,1,1,2,0,0,0,1,0,2,1,2,0,1,2,2,2,2,2,1,2,1,1,0,1,2,2,1,1,2,1,2,2,2,2…	MAGIv3.1_97299	MAGIv3.1_97299	chr01	14042589	Consistent
159	csu1171	mu	IDP7478	chr01	46.6	3.2	-	-	MMP	2,0,1,0,2,0,1,2,2,1,2,1,2,1,1,1,2,1,1,1,2,1,2,1,1,2,1,2,1,0,1,1,0,2,2,2,1,2,2,2,1,1,0,2,2,2,2,1,0,2,1,1,0,2,0,2,1,1,1,0,0,1,2,2,0,0,1,0,2,2,2,1,0,2,1,2,2,2,0,1,2,2,2,1,2,2,1,1,1,0,1,2,0,2,2,0,0,2,1,0,1,1,2,0,2,1,2,0,1,1,1,0,0,2,0,1,1,2,2,2,2,1,1,1,1,2,2,2,2,2,0,1,1,2,0,0,1,2,2,0,2,0,0,1,1,0,0,2,2,0,1,2,2,0,2,2,1,1,1,2,0,2,1,1,1,1,0,1,2,1,1,1,2,1,2,1,2,2,1,2,2,2,2,2,1,2,1,1,1,0,1,2,1,1,2,1,0,2,2,2…	-	-	-	-	-
160	mmp171b	sk	-	chr01	49.8	0	-	-	MMP	2,0,1,0,2,0,1,2,0,1,2,1,0,1,1,1,2,1,1,1,2,0,2,1,0,2,1,2,1,2,1,1,2,2,2,2,1,2,2,2,1,1,0,2,2,2,2,1,0,2,1,1,2,2,2,2,0,1,1,0,0,1,2,2,0,0,0,0,2,2,2,1,0,0,1,1,2,2,0,1,2,2,2,1,2,0,0,1,1,1,0,0,0,2,2,0,0,0,1,0,1,0,2,0,0,1,2,0,1,1,1,0,0,2,0,1,0,0,0,2,2,0,0,0,0,0,1,2,2,2,0,1,1,2,2,0,1,2,2,2,2,0,1,1,2,0,0,2,2,0,1,2,2,0,2,2,1,1,1,2,0,2,1,1,1,1,0,1,2,1,1,1,1,1,2,1,2,2,1,2,2,2,2,2,1,2,1,1,1,0,1,1,1,1,2,1,0,0,2,2…	-	-	-	-	-
161	umc1166	sk	-	chr01	51.8	0	-	-	MMP	2,0,1,0,2,0,1,2,2,1,2,1,1,1,1,1,2,1,1,0,0,1,2,1,1,2,1,2,1,1,1,1,2,0,2,2,0,2,2,2,1,1,0,2,2,2,2,1,0,2,1,1,2,2,0,2,1,1,1,0,0,1,2,2,0,0,1,0,2,0,2,1,0,2,1,1,2,2,0,1,2,2,2,1,2,0,0,1,1,1,1,2,0,2,2,0,0,2,1,0,1,1,2,2,0,1,2,0,1,1,1,0,0,2,2,1,1,2,2,2,2,0,1,1,1,0,2,2,2,2,0,1,1,2,2,0,1,2,2,2,2,0,0,1,0,0,0,1,1,0,2,1,1,0,2,2,1,1,1,2,0,2,1,1,1,1,0,1,2,1,1,1,1,1,2,1,2,2,1,2,2,2,2,2,1,2,1,1,0,0,0,1,1,1,2,1,0,2,2,2…	AI438624,CC742438,CC742639,CC742439,CC742638	-	-	-	-
162	gnp_QAT3g07b	sk	-	chr01	51.8	0	-	-	Genoplante Map	2,0,0,0,2,0,1,2,0,1,0,1,0,1,1,1,2,0,0,1,2,1,2,1,0,2,1,2,1,1,1,1,2,2,0,0,1,0,0,0,0,0,0,2,0,0,2,1,0,2,1,0,0,2,0,2,1,0,0,0,0,1,2,0,0,0,0,0,2,2,0,1,0,0,0,0,0,0,0,0,0,0,0,0,0,0,0,0,0,0,0,0,0,0,0,0,0,0,0,0,0,0,0,0,0,0,0,0,0,0,0,0,0,0,0,0,0,0,0,0,0,0,0,0,0,0,0,0,0,0,0,0,0,0,0,0,0,0,0,0,0,0,0,0,0,0,0,0,0,0,0,0,0,0,0,0,0,0,0,0,0,0,0,0,0,0,0,0,0,0,0,0,0,0,0,0,0,0,0,0,0,0,0,0,0,0,0,0,0,0,0,0,0,0,0,0,0,0,0,0…	CD989576	CD989576	chr01	15021908	Consistent
163	TIDP7101	sk	-	chr01	53.3	0	Co-Dominant	TGCE	ISU Map7	2,0,0,0,2,0,2,2,0,1,0,1,0,1,1,1,2,0,0,1,2,1,2,1,0,2,1,2,1,1,1,1,2,2,0,0,1,2,0,0,1,0,1,2,0,2,2,1,0,2,1,0,2,2,0,2,1,0,1,0,0,1,2,0,0,0,0,0,0,2,2,1,0,2,0,0,0,0,0,0,0,0,0,0,0,0,0,0,0,0,0,0,0,0,0,0,0,0,0,0,0,0,0,0,0,0,0,0,0,0,0,0,0,0,0,0,0,0,0,0,0,0,0,0,0,0,0,0,0,0,0,0,0,0,0,0,0,0,0,0,0,0,0,0,0,0,0,0,0,0,0,0,0,0,0,0,0,0,0,0,0,0,0,0,0,0,0,0,0,0,0,0,0,0,0,0,0,0,0,0,0,0,0,0,0,0,0,0,0,0,0,0,0,0,0,0,0,0,0,0…	MAGIv3.1_51969	-	-	-	-
164	IDP5887	mu	TIDP7101	chr01	53.3	0.5	Dominant	+/-	ISU Map7	2,1,2,2,2,1,2,1,0,1,2,1,1,1,1,1,2,0,0,1,2,1,1,1,1,2,1,2,1,1,1,1,2,2,0,0,1,2,0,1,1,2,1,2,2,2,2,1,2,2,1,1,2,2,2,2,1,0,0,1,2,1,2,0,2,2,1,1,0,1,2,1,1,2,1,1,0,2,1,1,2,0,2,1,2,1,1,1,2,1,1,2,2,2,2,2,1,1,1,1,1,1,0,2,2,1,2,1,1,0,1,2,1,2,1,2,1,2,0,2,2,2,1,1,0,0,1,2,2,2,1,1,0,2,0,1,2,2,2,0,2,1,1,1,2,1,1,1,2,2,1,0,2,2,2,2,1,0,0,0,1,1,0,1,2,1,1,1,2,0,0,0,1,0,2,1,2,0,1,2,2,2,2,2,1,2,1,1,0,2,1,2,1,1,1,1,2,2,2,2…	MAGIv3.1_77099	MAGIv3.1_77099	chr01	15475460	Consistent
165	IDPCP80324	mu	TIDP7101	chr01	53.3	1.8	Dominant	+/-	ISU Map7	2,1,2,2,2,1,2,1,0,1,2,1,1,1,1,1,2,0,0,1,2,1,1,1,1,2,1,2,1,1,1,1,2,2,0,0,1,2,0,1,1,2,1,2,2,2,2,1,2,2,1,1,2,2,2,2,1,0,0,1,2,1,2,0,2,2,1,1,0,1,2,1,1,2,1,1,0,2,1,1,2,0,2,1,2,1,1,1,2,1,1,2,2,2,2,2,1,1,1,1,1,1,0,2,2,1,2,1,1,0,1,2,1,1,1,2,1,2,0,2,2,2,1,1,0,0,1,2,2,2,1,1,0,2,0,1,2,2,2,0,2,1,1,1,1,1,1,1,2,1,1,0,2,2,2,2,1,0,2,2,1,1,0,1,2,1,1,1,2,0,0,0,1,0,2,1,2,0,1,2,2,2,2,1,1,2,1,1,0,2,1,2,1,1,1,1,2,2,2,2…	MAGIv3.1_80324	MAGIv3.1_80324	chr01	15389028	Consistent
166	IDP209	sk	-	chr01	55	0	Dominant	+/-	ISU Map7	1,0,0,0,2,0,2,2,0,1,0,1,0,1,1,1,2,0,0,1,2,1,1,1,0,2,1,2,1,1,1,1,2,2,0,0,1,2,0,0,1,0,1,2,0,2,2,1,0,2,1,0,2,2,0,2,1,0,1,0,0,1,2,0,0,0,0,0,1,1,2,2,0,2,0,0,0,0,0,0,0,0,0,0,0,0,0,0,0,0,0,0,0,0,0,0,0,0,0,0,0,0,0,0,0,0,0,0,0,0,0,0,0,0,0,0,0,0,0,0,0,0,0,0,0,0,0,0,0,0,0,0,0,0,0,0,0,0,0,0,0,0,0,0,0,0,0,0,0,0,0,0,0,0,0,0,0,0,0,0,0,0,0,0,0,0,0,0,0,0,0,0,0,0,0,0,0,0,0,0,0,0,0,0,0,0,0,0,0,0,0,0,0,0,0,0,0,0,0,0…	MEC_27263_P95-Mar06	MEC_27263_P95-Mar06	chr01	15737241	Consistent
167	umc1568	mu	IDP209	chr01	55	0.8	-	-	MMP	1,0,1,0,2,0,2,2,2,1,2,1,1,1,1,1,2,1,1,1,2,1,1,1,1,2,1,2,1,1,1,1,2,2,2,2,1,2,2,2,1,2,2,2,2,2,2,1,0,2,1,1,2,2,2,2,1,1,1,0,0,1,2,2,0,0,1,0,2,1,2,2,0,2,1,1,2,2,0,1,2,2,2,1,2,1,1,1,2,1,1,2,0,2,2,0,0,1,1,0,1,1,2,2,2,1,2,0,1,1,1,0,0,1,1,2,1,2,1,2,2,2,1,1,1,2,1,1,2,2,0,1,1,2,2,0,2,2,2,2,2,0,2,1,2,0,0,1,2,0,1,2,2,0,2,2,1,2,2,2,0,2,1,1,1,2,0,1,2,1,1,1,1,1,2,1,2,2,1,2,2,2,1,2,1,2,2,1,1,0,1,1,1,1,2,1,0,2,2,2…	AY109469,CC756615,CC741790,CC756614,CC759468,AW061641,CC759469,CC784623,CC760720	AY109469,AW061641	chr01	15757520	Consistent
168	fbnlg1429	mu	IDP209	chr01	55	0.8	-	-	Genoplante Map	1,0,0,0,2,0,1,2,0,1,0,1,0,1,1,1,2,0,0,1,2,1,1,1,0,2,1,0,1,0,1,1,2,2,0,0,1,2,0,0,1,0,0,0,0,2,2,1,0,2,1,0,0,2,0,2,1,0,1,0,0,1,0,0,0,0,0,0,2,1,2,2,0,2,0,0,0,0,0,0,0,0,0,0,0,0,0,0,0,0,0,0,0,0,0,0,0,0,0,0,0,0,0,0,0,0,0,0,0,0,0,0,0,0,0,0,0,0,0,0,0,0,0,0,0,0,0,0,0,0,0,0,0,0,0,0,0,0,0,0,0,0,0,0,0,0,0,0,0,0,0,0,0,0,0,0,0,0,0,0,0,0,0,0,0,0,0,0,0,0,0,0,0,0,0,0,0,0,0,0,0,0,0,0,0,0,0,0,0,0,0,0,0,0,0,0,0,0,0,0…	AC193376	-	-	-	-
169	bnlg1429	mu	IDP209	chr01	55	0	-	-	MMP	1,0,1,0,2,0,1,2,2,1,2,1,1,1,1,1,2,1,1,1,2,1,1,1,1,2,1,2,1,1,1,1,2,2,2,2,1,2,2,2,1,1,1,2,2,2,2,1,0,2,1,1,2,2,2,2,1,1,0,0,0,1,2,2,0,0,1,0,2,1,2,2,0,2,1,1,2,2,0,1,2,2,2,1,2,1,1,1,2,1,1,2,0,2,2,0,0,1,1,0,1,1,2,2,2,1,2,0,1,1,1,0,0,1,1,2,1,0,0,2,2,2,1,1,1,2,1,1,2,2,0,0,1,2,2,0,1,2,2,2,2,0,2,1,2,0,0,1,2,0,1,2,2,0,2,2,1,2,2,2,0,2,1,1,1,2,0,1,2,1,1,1,1,1,2,1,2,2,1,2,2,2,1,2,1,2,2,1,1,0,1,1,1,1,2,1,0,2,2,2…	AC193376	-	-	-	-
170	IDP8570	mu	IDP209	chr01	55	0	Co-Dominant	Size	ISU Map7	1,1,0,2,2,1,1,2,0,1,2,1,1,1,1,1,2,0,0,1,2,1,1,1,1,2,1,2,1,1,1,1,2,2,0,0,1,2,0,1,1,1,1,2,2,2,2,1,2,2,1,1,2,2,2,2,1,0,0,1,1,1,2,0,2,2,1,0,0,0,2,2,1,2,1,1,0,2,1,1,2,0,2,1,2,1,1,1,2,1,1,2,2,2,2,2,1,1,1,1,1,1,0,2,2,1,2,1,1,0,1,2,1,1,1,2,1,2,0,2,2,2,1,1,0,0,1,2,2,2,1,1,0,2,0,1,1,2,2,0,2,1,1,1,2,1,1,1,2,2,1,0,2,2,2,2,1,0,0,0,1,1,0,1,2,2,1,1,2,0,0,0,1,0,2,1,2,0,1,2,2,2,1,2,1,2,1,1,0,2,1,2,1,1,2,1,2,2,2,2…	MAGIv3.1_45481	MAGIv3.1_45481	chr01	15941555	Consistent
171	IDP6846	mu	IDP209	chr01	55	0.7	Dominant	+/-	ISU Map7	1,0,0,0,2,0,1,2,0,1,0,1,0,1,2,1,2,0,0,1,2,1,1,1,0,2,1,2,1,1,1,1,2,2,0,0,1,2,0,0,1,0,1,2,0,2,2,1,0,2,1,0,2,2,0,2,1,0,1,0,0,1,2,0,0,0,0,0,1,1,2,2,0,2,0,0,0,0,0,0,0,0,0,0,0,0,0,0,0,0,0,0,0,0,0,0,0,0,0,0,0,0,0,0,0,0,0,0,0,0,0,0,0,0,0,0,0,0,0,0,0,0,0,0,0,0,0,0,0,0,0,0,0,0,0,0,0,0,0,0,0,0,0,0,0,0,0,0,0,0,0,0,0,0,0,0,0,0,0,0,0,0,0,0,0,0,0,0,0,0,0,0,0,0,0,0,0,0,0,0,0,0,0,0,0,0,0,0,0,0,0,0,0,0,0,0,0,0,0,0…	MAGIv3.1_111905	MAGIv3.1_111905	chr01	16727442	Consistent
172	TIDP3567	sk	-	chr01	55.7	0	Co-Dominant	TGCE	ISU Map7	1,0,0,0,2,0,1,2,0,1,0,1,0,1,1,1,2,0,0,1,2,0,1,1,0,2,1,2,1,1,1,1,2,2,0,0,1,2,0,0,1,0,1,2,0,2,2,1,0,2,1,0,2,2,0,2,1,0,1,0,0,1,2,0,0,0,0,0,0,1,2,2,0,2,0,0,0,0,0,0,0,0,0,0,0,0,0,0,0,0,0,0,0,0,0,0,0,0,0,0,0,0,0,0,0,0,0,0,0,0,0,0,0,0,0,0,0,0,0,0,0,0,0,0,0,0,0,0,0,0,0,0,0,0,0,0,0,0,0,0,0,0,0,0,0,0,0,0,0,0,0,0,0,0,0,0,0,0,0,0,0,0,0,0,0,0,0,0,0,0,0,0,0,0,0,0,0,0,0,0,0,0,0,0,0,0,0,0,0,0,0,0,0,0,0,0,0,0,0,0…	BM269272	BM269272	chr01	17396617	Consistent
173	IDP29	mu	TIDP3567	chr01	55.7	1	Dominant	-/+	ISU Map7	1,1,1,2,2,1,1,2,0,1,2,1,1,1,1,1,2,0,0,1,2,1,1,1,1,2,1,2,1,1,1,2,2,2,0,0,1,2,0,1,1,1,1,2,2,2,2,1,2,2,1,1,2,2,2,2,1,0,0,1,1,1,2,0,2,2,1,2,0,1,2,2,1,2,1,1,0,2,1,2,2,0,2,1,2,1,1,1,2,1,1,2,2,2,2,2,1,1,1,1,1,1,0,2,2,2,2,1,1,0,1,2,1,1,1,2,1,2,0,2,2,2,1,1,0,0,1,2,2,2,1,1,0,2,0,1,1,2,2,0,2,1,1,1,2,1,1,1,2,2,1,0,2,2,2,2,1,0,0,0,1,1,0,1,2,2,1,1,2,0,0,0,1,0,2,1,2,0,1,2,2,2,1,2,1,2,1,1,0,2,1,2,2,1,2,1,2,2,2,2…	AW355934	-	-	-	-
174	IDP7290	mu	TIDP3567	chr01	55.7	0.6	Co-Dominant	Size	ISU Map7	1,1,0,2,2,1,1,1,0,1,2,1,1,1,1,1,2,0,0,1,2,1,1,1,1,2,1,2,1,1,1,1,2,2,0,0,1,2,0,1,1,1,1,2,2,2,2,1,2,2,1,1,2,2,2,2,1,0,0,1,1,1,2,0,2,2,1,1,0,1,2,2,1,2,1,1,0,2,1,1,2,0,2,1,2,1,1,1,2,1,1,2,2,2,2,2,1,1,1,1,1,1,0,2,2,1,2,1,1,0,1,2,1,1,1,2,1,2,0,2,2,2,1,1,0,0,1,2,2,2,0,1,0,2,0,1,1,2,2,0,2,1,1,1,2,1,1,1,2,2,1,0,2,2,2,2,1,0,0,0,1,1,0,1,2,2,1,1,2,0,0,0,1,0,2,1,2,0,1,2,2,2,1,2,1,2,1,1,0,2,1,2,1,1,2,1,2,2,2,2…	MAGIv3.1_90939	-	-	-	-
175	IDP407	mu	TIDP3567	chr01	55.7	0.5	Dominant	+/-	ISU Map7	1,1,1,2,2,1,1,1,0,1,2,1,1,1,1,1,2,0,0,1,2,1,1,2,1,2,1,2,1,1,1,1,2,2,0,0,1,2,0,1,1,1,1,2,2,2,2,1,2,2,1,1,2,2,2,2,1,0,0,1,1,1,2,0,2,2,1,1,0,2,2,2,1,2,1,1,0,2,1,1,2,0,2,1,2,1,1,1,2,1,1,2,2,2,2,2,1,1,1,1,1,1,0,2,1,1,2,1,1,0,1,2,1,1,1,2,1,2,0,2,2,2,1,1,0,0,1,2,2,2,1,1,0,2,0,1,1,2,2,0,2,1,1,1,2,1,1,1,2,2,1,0,2,2,2,2,1,0,0,0,1,1,0,1,2,2,1,1,2,0,0,0,1,0,2,1,2,0,1,2,2,2,1,2,1,2,1,1,0,2,1,1,1,1,1,1,2,2,2,2…	MAGIv3.1_65217	MAGIv3.1_65217	chr01	16314039	Consistent
176	IDP829	mu	TIDP3567	chr01	55.7	0.3	Dominant	+/-	ISU Map7	1,1,2,2,2,1,1,1,0,1,2,1,1,1,1,1,2,0,0,1,2,1,1,1,1,2,1,2,1,1,1,1,2,2,0,0,1,2,0,1,1,1,1,2,2,2,2,1,2,2,1,1,2,2,2,2,1,0,0,1,1,1,2,0,2,2,1,1,0,1,2,2,1,2,1,1,0,2,1,1,2,0,2,1,2,1,1,1,2,1,1,2,2,2,2,2,1,1,1,1,1,1,0,2,2,1,2,1,1,0,1,2,1,1,1,2,1,2,0,2,2,2,1,1,0,0,1,2,2,2,1,1,0,2,0,1,1,2,2,0,2,1,1,1,2,1,1,1,2,2,1,0,2,2,2,2,1,0,2,2,1,1,0,1,2,2,1,1,2,0,0,0,1,0,2,1,2,0,1,2,2,2,1,2,1,2,1,1,0,2,1,1,1,1,1,1,2,2,2,2…	MAGIv3.1_29251	-	-	-	-
177	IDP3783	mu	TIDP3567	chr01	55.7	1.4	Dominant	+/-	ISU Map7	1,1,2,2,2,1,1,1,0,1,2,1,1,1,1,1,2,0,0,1,2,1,1,1,1,2,1,2,1,1,1,1,2,2,0,0,1,2,0,1,1,1,1,2,2,2,2,1,2,2,1,1,2,2,2,2,1,0,0,1,1,1,2,0,2,2,1,1,0,1,2,2,1,2,1,1,0,2,1,1,2,0,0,1,2,1,1,1,2,1,1,2,2,2,2,2,1,1,1,1,1,1,0,2,2,1,2,1,1,0,1,2,1,1,1,2,1,2,0,2,2,2,1,1,0,0,1,2,2,2,1,1,0,2,0,1,1,2,2,0,2,1,1,1,2,1,1,1,2,2,1,0,2,2,2,2,1,0,2,2,1,1,0,1,2,2,1,1,2,0,0,0,1,0,2,1,2,0,1,2,2,2,1,2,1,2,1,1,0,2,1,2,1,1,1,1,2,2,2,2…	MAGIv3.1_71456	MAGIv3.1_71456	chr01	16128163	Consistent
178	MAGI_38405	mu	TIDP3567	chr01	55.7	3.2	-	SNP	ISU SNP Map	1,1,0,2,2,1,2,2,0,1,2,1,1,1,1,1,2,0,0,1,2,1,1,1,1,2,1,2,1,1,1,1,2,2,0,0,1,2,0,0,1,2,1,2,2,2,2,1,2,2,1,1,2,2,2,2,1,0,0,1,2,1,2,0,2,2,1,0,0,1,2,2,1,2,1,1,0,2,1,1,2,0,2,1,2,1,1,1,2,1,1,2,2,2,2,2,1,1,1,1,1,1,0,2,2,1,2,1,1,0,1,2,1,1,1,2,1,2,0,2,2,2,1,1,0,0,1,2,2,2,1,1,0,2,0,1,2,2,2,0,2,1,1,1,0,1,1,1,2,2,1,0,2,2,2,2,1,0,0,0,1,1,0,1,2,1,1,1,2,0,0,0,1,0,2,1,2,0,1,2,2,2,1,2,1,2,1,1,0,2,1,2,1,1,2,1,2,2,2,2…	MAGIv3.1_38405	MAGIv3.1_38405	chr01	15726135	Consistent
179	php20640	mu	TIDP3567	chr01	55.7	2.6	-	-	MMP	1,0,1,0,0,0,1,2,2,1,0,0,1,0,1,1,2,1,1,0,2,1,1,1,2,2,1,2,1,1,1,1,2,2,2,2,1,2,2,0,1,1,0,2,2,2,2,1,0,2,0,1,2,2,2,2,1,1,1,0,0,1,2,2,0,0,0,0,2,1,2,2,0,2,1,1,2,2,0,1,2,2,2,1,0,1,1,1,2,1,1,2,0,2,2,0,0,1,1,0,1,1,2,0,2,1,2,0,0,0,0,1,0,0,1,1,1,2,0,0,2,2,1,1,0,0,1,2,1,2,0,1,1,0,0,0,0,2,0,2,1,0,2,1,2,0,0,1,2,0,1,0,2,0,1,2,1,2,2,2,0,2,1,1,1,0,0,1,2,1,1,1,1,1,0,1,2,2,1,0,2,2,1,2,1,2,0,1,1,0,0,0,1,1,2,1,0,2,2,2…	-	-	-	-	-
180	lim504	mu	TIDP3567	chr01	55.7	1.3	-	-	MMP	1,0,1,0,2,0,1,2,0,1,1,1,0,1,1,1,2,1,2,1,2,1,1,1,0,2,1,2,1,0,1,1,2,2,2,2,1,2,2,2,1,1,0,2,2,2,2,1,0,2,0,1,0,2,0,2,0,1,1,0,0,1,2,2,0,0,1,0,2,1,2,2,0,2,1,1,2,2,0,1,2,2,2,1,2,0,1,1,2,1,1,0,0,2,2,0,0,0,1,0,1,0,1,0,0,1,2,0,1,1,1,0,0,1,0,2,0,0,2,2,1,0,0,0,1,0,1,2,1,2,0,1,1,1,2,0,1,2,2,2,1,0,0,1,2,0,0,1,2,0,1,2,2,0,1,2,1,2,2,2,0,2,1,1,1,2,0,1,2,1,1,1,2,1,2,1,2,2,1,2,2,2,1,2,1,2,2,1,1,0,2,1,1,1,2,1,0,2,2,2…	-	-	-	-	-
181	gnp_QAE22b06b	mu	TIDP3567	chr01	55.7	0.4	-	-	Genoplante Map	1,0,0,0,2,0,1,2,0,1,0,1,0,1,1,1,2,0,0,1,2,1,1,1,0,2,1,2,1,1,1,1,2,2,0,0,1,0,0,0,0,0,1,2,0,0,0,0,0,2,1,0,0,2,0,2,1,0,0,0,0,0,0,0,0,0,0,0,0,1,0,2,0,0,0,0,0,0,0,0,0,0,0,0,0,0,0,0,0,0,0,0,0,0,0,0,0,0,0,0,0,0,0,0,0,0,0,0,0,0,0,0,0,0,0,0,0,0,0,0,0,0,0,0,0,0,0,0,0,0,0,0,0,0,0,0,0,0,0,0,0,0,0,0,0,0,0,0,0,0,0,0,0,0,0,0,0,0,0,0,0,0,0,0,0,0,0,0,0,0,0,0,0,0,0,0,0,0,0,0,0,0,0,0,0,0,0,0,0,0,0,0,0,0,0,0,0,0,0,0…	CD972469	CD972469	chr03	162187001	Inconsistent
182	TIDP3516	mu	TIDP3567	chr01	55.7	1.8	Co-Dominant	TGCE	ISU Map7	1,0,0,0,2,0,1,2,0,1,0,1,0,1,1,1,2,0,0,1,2,1,1,1,0,2,1,2,1,1,0,1,1,2,0,0,1,2,0,0,1,0,1,2,0,2,2,1,0,2,1,0,2,2,0,2,1,0,2,0,0,1,2,0,0,0,0,0,0,1,2,2,0,2,0,0,0,0,0,0,0,0,0,0,0,0,0,0,0,0,0,0,0,0,0,0,0,0,0,0,0,0,0,0,0,0,0,0,0,0,0,0,0,0,0,0,0,0,0,0,0,0,0,0,0,0,0,0,0,0,0,0,0,0,0,0,0,0,0,0,0,0,0,0,0,0,0,0,0,0,0,0,0,0,0,0,0,0,0,0,0,0,0,0,0,0,0,0,0,0,0,0,0,0,0,0,0,0,0,0,0,0,0,0,0,0,0,0,0,0,0,0,0,0,0,0,0,0,0,0…	MAGIv3.1_83210	MAGIv3.1_83210	chr01	17899137	Consistent
183	IDP4813	mu	TIDP3567	chr01	55.7	1.9	Dominant	+/-	ISU Map7	1,1,2,2,2,1,1,2,0,1,1,2,2,1,1,1,2,0,0,1,2,1,1,1,2,2,1,2,1,1,1,2,2,2,0,0,1,2,0,1,1,1,1,2,2,2,2,1,2,2,1,1,2,2,2,2,1,0,0,1,1,1,2,0,2,2,1,1,0,1,2,2,1,2,2,2,0,2,1,1,2,0,2,1,2,1,1,1,2,1,1,2,2,2,2,2,1,1,1,1,1,1,0,2,2,1,2,2,1,0,1,2,1,2,1,2,1,2,0,2,2,2,1,1,0,0,1,2,1,2,1,2,0,1,0,1,1,2,2,0,1,2,2,1,2,1,1,1,2,2,1,0,2,2,1,2,1,0,0,0,1,2,0,1,2,2,1,1,2,0,0,0,2,0,2,1,2,0,1,2,2,2,1,2,1,2,1,1,0,2,1,2,1,1,1,1,2,2,2,2…	MAGIv3.1_25990	MAGIv3.1_25990	chr01	17678078	Consistent
184	IDP7169	mu	TIDP3567	chr01	55.7	2.7	Dominant	+/-	ISU Map7	1,1,2,2,2,1,1,1,0,2,1,2,1,1,1,1,2,0,0,1,2,1,1,1,2,2,1,2,1,1,1,1,2,2,0,0,1,2,0,1,1,1,1,2,2,2,2,1,2,2,1,1,2,2,2,2,1,0,0,1,1,1,2,0,2,2,1,1,0,1,2,2,1,2,2,2,0,2,1,1,2,0,2,1,2,1,1,1,2,1,2,2,2,2,2,2,1,1,1,1,1,1,0,2,2,1,2,2,1,0,1,1,1,1,1,2,1,2,0,2,2,2,1,1,0,0,1,2,1,2,1,1,0,1,0,1,1,2,2,0,1,2,2,1,2,1,1,1,2,2,1,0,2,2,1,2,1,0,2,2,1,2,0,1,2,2,1,1,2,0,0,0,2,0,2,1,2,0,1,2,2,2,1,2,1,2,1,1,0,2,1,2,1,1,2,1,2,2,2,2…	MAGIv3.1_13766	MAGIv3.1_13766	chr01	17718100	Consistent
185	IDP4230	mu	TIDP3567	chr01	55.7	2.6	Dominant	+/-	ISU Map7	1,1,2,2,1,1,1,1,0,1,1,1,1,1,1,1,2,0,0,1,2,1,1,1,2,2,1,2,1,1,1,1,2,2,0,0,1,2,0,1,1,1,1,2,2,2,2,1,2,2,1,1,2,2,2,2,1,0,0,1,1,1,2,0,2,2,1,1,0,1,2,2,1,2,1,1,0,2,1,1,2,0,2,1,2,1,1,1,2,1,1,2,2,2,1,1,1,1,1,1,2,1,0,2,2,2,2,2,1,0,1,1,1,1,1,2,1,2,0,2,1,2,1,1,0,0,1,2,1,2,1,1,0,1,0,1,1,2,2,0,1,1,2,1,1,1,1,1,2,1,1,0,2,2,1,2,1,0,2,2,1,2,0,1,2,2,1,1,2,0,0,0,2,0,2,1,2,0,1,2,2,2,1,2,1,2,1,1,0,2,1,2,2,1,2,1,2,2,2,2…	MAGIv3.1_37539	MAGIv3.1_37539	chr01	17926433	Consistent
186	TIDP3769	mu	TIDP3567	chr01	55.7	1.1	Co-Dominant	TGCE	ISU Map7	1,0,0,0,2,0,2,2,0,1,0,1,0,1,1,1,2,0,0,1,2,1,1,1,0,2,1,2,1,1,1,1,2,2,0,0,1,2,0,0,1,0,0,2,0,2,2,1,0,2,1,0,2,2,0,2,1,0,1,0,0,1,2,0,0,0,0,0,1,1,0,2,0,2,0,0,0,0,0,0,0,0,0,0,0,0,0,0,0,0,0,0,0,0,0,0,0,0,0,0,0,0,0,0,0,0,0,0,0,0,0,0,0,0,0,0,0,0,0,0,0,0,0,0,0,0,0,0,0,0,0,0,0,0,0,0,0,0,0,0,0,0,0,0,0,0,0,0,0,0,0,0,0,0,0,0,0,0,0,0,0,0,0,0,0,0,0,0,0,0,0,0,0,0,0,0,0,0,0,0,0,0,0,0,0,0,0,0,0,0,0,0,0,0,0,0,0,0,0,0…	MEC_31520_P95-Mar06	MEC_31520_P95-Mar06	chr01	18626159	Consistent
187	TIDP6162	mu	TIDP3567	chr01	55.7	0	Co-Dominant	TGCE	ISU Map7	1,0,0,0,2,0,2,2,0,1,0,1,0,1,1,1,2,0,0,1,2,1,1,1,0,2,1,2,1,1,1,1,2,2,0,0,1,2,0,0,1,0,1,2,0,2,2,1,0,2,1,0,2,2,0,2,1,0,1,0,0,1,2,0,0,0,0,0,1,1,2,2,0,2,0,0,0,0,0,0,0,0,0,0,0,0,0,0,0,0,0,0,0,0,0,0,0,0,0,0,0,0,0,0,0,0,0,0,0,0,0,0,0,0,0,0,0,0,0,0,0,0,0,0,0,0,0,0,0,0,0,0,0,0,0,0,0,0,0,0,0,0,0,0,0,0,0,0,0,0,0,0,0,0,0,0,0,0,0,0,0,0,0,0,0,0,0,0,0,0,0,0,0,0,0,0,0,0,0,0,0,0,0,0,0,0,0,0,0,0,0,0,0,0,0,0,0,0,0,0…	MAGIv3.1_113827	MAGIv3.1_113827	chr01	18763688	Consistent
188	TIDP2777	mu	TIDP3567	chr01	55.7	3.2	Co-Dominant	TGCE	ISU Map7	1,0,0,0,2,0,1,2,0,1,0,1,0,1,1,1,2,0,0,1,2,1,1,1,0,2,1,2,1,1,1,1,2,2,0,0,1,2,0,0,1,0,1,2,0,2,2,1,0,2,1,0,2,2,0,2,1,0,1,0,0,1,2,0,0,0,0,0,0,1,2,2,0,2,0,0,0,0,0,0,0,0,0,0,0,0,0,0,0,0,0,0,0,0,0,0,0,0,0,0,0,0,0,0,0,0,0,0,0,0,0,0,0,0,0,0,0,0,0,0,0,0,0,0,0,0,0,0,0,0,0,0,0,0,0,0,0,0,0,0,0,0,0,0,0,0,0,0,0,0,0,0,0,0,0,0,0,0,0,0,0,0,0,0,0,0,0,0,0,0,0,0,0,0,0,0,0,0,0,0,0,0,0,0,0,0,0,0,0,0,0,0,0,0,0,0,0,0,0,0…	MEC_82694_P95-Mar06	-	-	-	-
189	IDP4506	mu	TIDP3567	chr01	55.7	0.7	Dominant	+/-	ISU Map7	1,0,0,0,2,0,1,2,0,1,0,1,0,1,1,1,2,0,0,1,2,1,1,1,0,2,1,2,1,1,1,1,2,2,0,0,1,2,0,0,1,0,1,2,0,2,2,1,0,2,1,0,2,2,0,2,1,0,1,0,0,1,2,0,0,0,0,0,2,1,2,2,0,2,0,0,0,0,0,0,0,0,0,0,0,0,0,0,0,0,0,0,0,0,0,0,0,0,0,0,0,0,0,0,0,0,0,0,0,0,0,0,0,0,0,0,0,0,0,0,0,0,0,0,0,0,0,0,0,0,0,0,0,0,0,0,0,0,0,0,0,0,0,0,0,0,0,0,0,0,0,0,0,0,0,0,0,0,0,0,0,0,0,0,0,0,0,0,0,0,0,0,0,0,0,0,0,0,0,0,0,0,0,0,0,0,0,0,0,0,0,0,0,0,0,0,0,0,0,0…	MAGIv3.1_110870	MAGIv3.1_110870	chr01	17989985	Consistent
190	IDP7413	sk	-	chr01	56.4	0	Co-Dominant	Size	ISU Map7	1,1,0,2,2,1,1,1,0,1,1,1,1,1,1,1,2,0,0,1,2,1,1,1,2,2,1,2,1,1,1,1,2,2,0,0,1,2,0,1,1,1,1,2,2,2,2,1,2,2,1,1,2,2,2,2,1,0,0,1,1,1,2,0,2,2,1,1,0,1,2,2,1,2,1,1,0,2,1,1,2,0,2,1,2,1,1,1,2,1,1,2,2,2,2,1,1,1,1,1,1,1,0,2,0,1,0,0,0,0,0,0,0,0,0,0,0,0,0,0,0,0,0,0,0,0,0,0,0,0,0,0,0,0,0,0,0,0,0,0,0,0,0,0,0,0,0,0,0,0,0,0,0,0,0,0,0,0,0,0,0,0,0,0,0,0,0,0,0,0,0,0,0,0,0,0,0,0,0,0,0,0,0,0,0,0,0,0,0,0,0,0,0,0,0,0,0,0,0,0…	MAGIv3.1_110869	MAGIv3.1_110869	chr01	17988379	Consistent
191	IDP343	mu	IDP7413	chr01	56.4	0.6	Dominant	+/-	ISU Map7	1,1,2,2,2,1,1,1,0,1,1,1,1,1,1,1,2,0,0,1,2,1,1,2,2,2,1,2,1,1,1,1,2,2,0,0,1,2,0,1,1,1,1,2,2,2,2,1,2,2,1,1,2,2,2,2,1,0,0,1,1,1,2,0,2,2,1,1,0,2,2,2,1,2,1,1,0,2,1,1,2,0,2,1,2,1,1,1,2,1,1,2,2,2,2,1,1,1,1,1,1,1,0,2,1,1,2,2,1,0,1,1,1,1,1,2,1,2,0,2,1,2,1,1,0,0,1,2,1,2,1,1,0,1,0,1,1,2,2,0,1,1,2,1,2,1,1,1,2,2,1,0,2,2,1,2,1,0,0,0,1,2,0,1,2,2,1,1,2,0,0,0,2,0,2,1,2,0,1,2,2,2,1,2,1,2,1,1,0,2,1,1,1,1,1,1,2,2,2,2…	MAGIv3.1_39304	MAGIv3.1_39304	chr01	18068243	Consistent
192	IDP560	mu	IDP7413	chr01	56.4	1.1	Dominant	+/-	ISU Map7	1,1,2,2,2,1,2,1,0,1,1,1,1,1,1,1,2,0,0,1,2,1,1,2,2,2,1,2,1,1,1,1,2,2,0,0,1,2,0,1,1,1,1,2,2,2,2,1,2,2,1,1,2,2,2,2,1,0,0,1,1,1,2,0,2,2,1,1,0,2,2,2,1,2,1,1,0,2,1,1,2,0,2,1,1,1,1,1,2,1,1,2,2,2,2,1,1,1,1,1,1,1,0,2,1,1,2,2,1,0,1,1,1,1,1,2,1,2,0,2,1,2,1,1,0,0,1,2,1,2,1,1,0,1,0,1,1,2,2,0,1,1,2,1,2,1,1,1,2,2,1,0,2,2,1,2,1,0,2,2,1,2,0,1,2,2,1,1,2,0,0,0,2,0,2,1,2,0,1,2,2,2,1,2,1,2,1,1,0,2,1,1,1,1,1,1,2,2,2,2…	MEC_31520_P95-Mar06	MEC_31520_P95-Mar06	chr01	18626159	Consistent
193	IDP622	sk	-	chr01	57.4	0	Dominant	+/-	ISU Map7	1,1,2,2,2,1,2,1,0,1,1,1,1,1,1,1,2,0,0,1,2,1,1,1,2,2,1,2,1,1,1,1,2,2,0,0,1,2,0,1,1,1,1,2,2,2,2,1,2,2,2,1,2,2,2,2,1,0,0,1,1,1,2,0,2,2,1,1,0,1,2,2,1,2,1,1,0,2,1,1,2,0,2,1,1,1,1,1,2,1,1,2,2,2,2,1,1,1,1,1,1,1,0,2,2,1,2,2,1,0,1,1,1,1,1,2,1,2,0,2,1,2,1,1,0,0,1,2,1,2,1,1,0,1,0,1,1,2,2,0,1,1,2,1,2,1,1,1,2,2,1,0,2,2,1,2,1,0,2,2,1,2,0,1,2,2,1,1,2,0,0,0,2,0,2,1,2,0,1,2,2,2,2,1,1,2,1,1,0,2,1,2,1,1,1,1,2,2,2,2…	MAGIv3.1_18459	MAGIv3.1_18459	chr01	18626567	Consistent
194	IDP4470	sk	-	chr01	60.1	0	Dominant	+/-	ISU Map7	1,1,2,2,2,1,2,2,0,1,1,1,1,1,1,2,2,0,0,1,2,2,1,1,2,1,1,2,1,1,1,1,2,1,0,0,1,2,0,2,1,1,1,2,2,2,2,1,2,2,1,1,2,2,2,2,1,0,0,1,1,1,2,0,2,2,1,1,0,1,2,2,1,2,1,1,0,2,1,1,2,0,2,1,1,2,1,1,2,1,1,2,2,2,2,1,1,1,1,1,1,1,0,2,2,2,2,2,1,0,1,1,1,1,1,2,1,2,0,2,1,1,1,1,0,0,1,2,1,2,1,1,0,2,0,1,1,2,2,0,1,1,2,1,2,2,1,1,2,2,1,0,2,2,1,2,1,0,2,2,2,2,0,2,2,2,1,1,2,0,0,0,2,0,2,1,2,0,1,2,2,2,2,2,1,2,1,1,0,2,1,2,1,1,1,2,2,2,2,2…	MAGIv3.1_69872	MAGIv3.1_69872	chr01	19260791	Consistent
195	IDP5878	mu	IDP4470	chr01	60.1	1.1	Dominant	+/-	ISU Map7	1,1,2,2,2,1,2,2,0,1,1,1,1,1,1,2,2,0,0,1,2,2,1,1,2,1,1,2,1,1,1,1,2,1,0,0,1,2,0,2,1,1,1,2,2,2,2,1,2,2,1,1,2,2,2,2,1,0,0,1,1,1,2,0,2,2,1,1,0,1,2,2,1,2,1,1,0,2,1,1,2,0,2,1,1,2,1,1,1,1,1,2,1,2,2,1,1,1,1,1,1,1,0,2,2,2,2,2,1,0,1,1,1,1,1,2,1,2,0,2,2,1,1,1,0,0,1,2,1,2,1,1,0,1,0,1,1,2,2,0,1,1,2,1,2,2,1,1,2,2,1,0,2,2,1,2,1,0,2,2,2,2,0,2,2,2,1,1,2,0,0,0,2,0,2,1,2,0,1,2,2,2,1,2,1,2,1,1,0,2,1,2,1,1,1,2,2,2,2,2…	MAGIv3.1_75042	MAGIv3.1_75042	chr01	19610818	Consistent
196	TIDP3406	mu	IDP4470	chr01	60.1	0.4	Co-Dominant	TGCE	ISU Map7	1,0,0,0,2,0,2,2,0,1,0,1,0,1,1,2,2,0,0,1,2,2,1,1,0,1,1,2,1,1,1,1,2,1,0,0,1,2,0,0,1,0,1,2,0,2,2,1,0,2,1,0,2,2,0,2,1,0,1,0,0,1,2,0,0,0,0,0,1,1,0,2,0,2,0,0,0,0,0,0,0,0,0,0,0,0,0,0,0,0,0,0,0,0,0,0,0,0,0,0,0,0,0,0,0,0,0,0,0,0,0,0,0,0,0,0,0,0,0,0,0,0,0,0,0,0,0,0,0,0,0,0,0,0,0,0,0,0,0,0,0,0,0,0,0,0,0,0,0,0,0,0,0,0,0,0,0,0,0,0,0,0,0,0,0,0,0,0,0,0,0,0,0,0,0,0,0,0,0,0,0,0,0,0,0,0,0,0,0,0,0,0,0,0,0,0,0,0,0,0…	MAGIv4.0_61546	-	-	-	-
197	TIDP5126	mu	IDP4470	chr01	60.1	1.1	Co-Dominant	TGCE	ISU Map7	1,0,0,0,2,0,2,2,0,1,0,1,0,1,1,2,2,0,0,1,2,2,1,1,0,1,0,2,1,1,1,1,2,1,0,0,1,2,0,0,1,0,1,2,0,2,2,1,0,2,1,0,2,2,0,2,1,0,1,0,0,1,2,0,0,0,0,0,0,1,2,2,0,2,0,0,0,0,0,0,0,0,0,0,0,0,0,0,0,0,0,0,0,0,0,0,0,0,0,0,0,0,0,0,0,0,0,0,0,0,0,0,0,0,0,0,0,0,0,0,0,0,0,0,0,0,0,0,0,0,0,0,0,0,0,0,0,0,0,0,0,0,0,0,0,0,0,0,0,0,0,0,0,0,0,0,0,0,0,0,0,0,0,0,0,0,0,0,0,0,0,0,0,0,0,0,0,0,0,0,0,0,0,0,0,0,0,0,0,0,0,0,0,0,0,0,0,0,0,0…	MAGIv3.1_37190	MAGIv3.1_37190	chr01	19625097	Consistent
198	IDP8623	mu	IDP4470	chr01	60.1	0.4	Dominant	+/-	ISU Map7	1,0,0,0,2,0,0,2,0,1,0,1,0,1,1,2,2,0,0,1,2,2,1,1,0,1,1,2,1,1,1,2,2,1,0,0,1,2,0,0,1,0,1,2,0,2,2,1,0,2,1,0,2,2,0,2,1,0,1,0,0,1,2,0,0,0,0,0,1,1,2,2,0,2,0,0,0,0,0,0,0,0,0,0,0,0,0,0,0,0,0,0,0,0,0,0,0,0,0,0,0,0,0,0,0,0,0,0,0,0,0,0,0,0,0,0,0,0,0,0,0,0,0,0,0,0,0,0,0,0,0,0,0,0,0,0,0,0,0,0,0,0,0,0,0,0,0,0,0,0,0,0,0,0,0,0,0,0,0,0,0,0,0,0,0,0,0,0,0,0,0,0,0,0,0,0,0,0,0,0,0,0,0,0,0,0,0,0,0,0,0,0,0,0,0,0,0,0,0,0…	MAGIv3.1_60855	MAGIv3.1_60855	chr01	21677322	Consistent
199	TIDP3048	mu	IDP4470	chr01	60.1	0.4	Co-Dominant	TGCE	ISU Map7	1,0,0,0,2,0,2,2,0,1,0,1,0,1,1,2,2,0,0,1,2,2,1,1,0,1,1,2,1,1,1,2,2,1,0,0,1,2,0,0,1,0,1,2,0,2,2,1,0,2,1,0,2,2,0,2,1,0,1,0,0,1,2,0,0,0,0,0,0,1,2,2,0,2,0,0,0,0,0,0,0,0,0,0,0,0,0,0,0,0,0,0,0,0,0,0,0,0,0,0,0,0,0,0,0,0,0,0,0,0,0,0,0,0,0,0,0,0,0,0,0,0,0,0,0,0,0,0,0,0,0,0,0,0,0,0,0,0,0,0,0,0,0,0,0,0,0,0,0,0,0,0,0,0,0,0,0,0,0,0,0,0,0,0,0,0,0,0,0,0,0,0,0,0,0,0,0,0,0,0,0,0,0,0,0,0,0,0,0,0,0,0,0,0,0,0,0,0,0,0…	MAGIv3.1_27436	MAGIv3.1_27436	chr01	21450784	Consistent
200	gnp_QCI19e03	mu	IDP4470	chr01	60.1	0.4	-	-	Genoplante Map	1,0,0,0,2,0,2,2,0,1,0,1,0,1,1,2,2,0,0,1,2,2,1,1,0,1,1,2,1,1,1,2,2,1,0,0,1,0,0,0,0,0,1,2,0,0,2,1,0,2,1,0,0,2,0,2,1,0,0,0,0,1,2,0,0,0,0,0,2,1,0,2,0,0,0,0,0,0,0,0,0,0,0,0,0,0,0,0,0,0,0,0,0,0,0,0,0,0,0,0,0,0,0,0,0,0,0,0,0,0,0,0,0,0,0,0,0,0,0,0,0,0,0,0,0,0,0,0,0,0,0,0,0,0,0,0,0,0,0,0,0,0,0,0,0,0,0,0,0,0,0,0,0,0,0,0,0,0,0,0,0,0,0,0,0,0,0,0,0,0,0,0,0,0,0,0,0,0,0,0,0,0,0,0,0,0,0,0,0,0,0,0,0,0,0,0,0,0,0,0…	CF040862	CF040862	chr01	21345599	Consistent
201	gnp_QAE7c12d	mu	IDP4470	chr01	60.1	0	-	-	Genoplante Map	1,0,0,0,2,0,2,2,0,1,0,1,0,1,1,2,2,0,0,1,2,2,1,1,0,1,1,2,1,1,1,2,2,1,0,0,1,0,0,0,0,0,1,2,0,0,2,1,0,2,1,0,0,2,0,2,1,0,0,0,0,1,2,0,0,0,0,0,2,1,0,2,0,0,0,0,0,0,0,0,0,0,0,0,0,0,0,0,0,0,0,0,0,0,0,0,0,0,0,0,0,0,0,0,0,0,0,0,0,0,0,0,0,0,0,0,0,0,0,0,0,0,0,0,0,0,0,0,0,0,0,0,0,0,0,0,0,0,0,0,0,0,0,0,0,0,0,0,0,0,0,0,0,0,0,0,0,0,0,0,0,0,0,0,0,0,0,0,0,0,0,0,0,0,0,0,0,0,0,0,0,0,0,0,0,0,0,0,0,0,0,0,0,0,0,0,0,0,0,0…	CX129458	-	-	-	-
202	IDP673	mu	IDP4470	chr01	60.1	1	Dominant	-/+	ISU Map7	1,1,1,2,2,1,2,2,0,1,1,1,1,1,1,2,2,0,0,1,2,2,1,1,2,1,1,2,1,1,1,2,2,1,0,0,1,2,0,2,1,1,1,2,2,2,2,1,2,2,1,1,2,2,2,2,1,0,0,1,1,1,2,0,1,2,1,2,0,2,2,2,1,2,1,1,0,2,1,1,2,0,2,1,1,2,1,1,2,1,1,2,2,2,2,1,1,1,1,1,1,1,0,2,2,2,2,2,1,0,1,1,1,1,1,2,1,2,0,2,2,1,1,1,0,0,1,2,1,2,1,2,0,1,0,1,1,2,2,0,1,1,2,1,2,2,1,1,2,2,1,0,2,2,1,2,1,0,0,0,2,2,0,2,2,2,1,1,2,0,0,0,2,0,2,2,2,0,1,2,2,2,1,2,1,2,1,1,0,2,1,2,1,1,2,2,2,2,2,2…	MEC_12454_P95-Mar06	MEC_12454_P95-Mar06	chr01	21557620	Consistent
203	IDP3970	mu	IDP4470	chr01	60.1	0.1	Dominant	+/-	ISU Map7	1,1,0,2,2,1,2,2,0,1,1,1,1,1,1,2,2,0,0,1,2,2,1,1,2,1,1,2,1,1,1,2,2,1,0,0,1,2,0,2,1,1,1,2,2,2,2,1,2,2,1,1,2,2,2,2,1,0,0,1,1,1,2,0,1,2,1,1,0,1,2,2,0,2,1,1,0,2,1,1,2,0,2,1,1,2,1,1,2,1,1,2,0,2,2,1,1,1,1,1,1,1,0,0,2,2,2,2,1,0,1,1,1,1,1,2,1,2,0,2,2,1,1,1,0,0,1,2,1,2,1,2,0,1,0,1,1,2,2,0,1,1,2,1,2,2,1,1,2,2,1,0,2,2,1,2,1,0,0,0,2,2,0,2,2,2,1,1,2,0,0,0,2,0,2,2,2,0,1,2,2,2,1,2,1,2,1,1,0,2,1,2,1,1,1,2,2,2,2,2…	MAGIv3.1_35948	MAGIv3.1_35948	chr01	20456344	Consistent
204	IDP5948	mu	IDP4470	chr01	60.1	0.1	Dominant	+/-	ISU Map7	1,1,2,2,2,1,2,2,0,1,1,1,1,1,1,2,2,0,0,1,2,2,1,1,2,1,1,2,1,1,1,2,2,1,0,0,1,2,0,2,1,1,1,2,2,2,2,1,2,2,1,1,2,2,2,2,1,0,0,1,1,1,2,0,1,2,1,1,0,1,2,2,1,2,1,1,0,2,1,1,2,0,2,1,1,2,1,1,2,1,1,2,2,2,2,1,1,1,1,1,1,1,0,2,2,2,2,2,1,0,1,1,1,1,1,2,1,2,0,2,2,1,1,1,0,0,1,2,1,2,1,2,0,1,0,1,1,2,2,0,1,1,2,1,2,2,1,1,2,2,1,0,2,2,1,2,1,0,2,2,2,2,0,2,2,2,1,1,2,0,0,0,2,0,2,2,2,0,1,2,2,2,1,2,1,2,1,1,0,2,1,2,1,1,1,2,2,2,2,2…	MAGIv3.1_88948	MAGIv3.1_88948	chr01	21591185	Consistent
205	IDP871	sk	-	chr01	61.3	0	Co-Dominant	Size	ISU Map7	1,1,0,2,2,1,2,2,0,0,1,1,1,1,1,2,2,0,0,1,2,2,1,1,2,1,1,2,1,1,1,2,2,1,0,0,1,2,0,2,1,1,1,2,2,2,2,1,2,2,1,1,2,2,2,2,1,0,0,1,1,1,2,0,1,2,1,0,0,1,2,2,1,2,1,1,0,2,1,1,2,0,0,1,1,2,1,1,2,1,1,2,2,2,2,1,1,1,1,1,1,1,0,2,2,2,2,2,1,0,1,1,1,1,1,2,1,2,0,2,2,1,1,1,0,0,1,2,1,2,1,2,0,1,0,1,1,2,2,0,1,1,2,1,2,2,1,1,2,2,1,0,2,2,1,2,1,0,0,0,2,2,0,2,2,2,1,1,2,0,0,0,2,0,2,2,2,0,1,2,2,2,1,2,1,2,1,1,0,2,1,2,1,1,0,2,2,2,2,2…	BM080714	BM080714	chr01	19919914	Consistent
206	umc1976	sk	-	chr01	63.9	0	-	-	MMP	1,0,1,0,0,0,2,2,2,1,1,1,0,0,1,2,2,1,2,1,2,2,1,1,2,1,1,2,1,0,1,1,2,1,2,2,2,2,2,2,1,0,1,2,2,2,2,1,0,2,1,1,2,2,2,2,1,1,1,0,0,1,1,2,0,0,0,0,2,0,2,2,0,2,1,2,2,0,0,1,2,0,2,1,1,0,1,1,2,0,1,2,0,2,2,0,0,1,1,0,1,1,1,2,2,2,2,0,1,1,1,1,0,1,1,2,0,2,2,2,2,0,1,1,0,1,1,1,1,2,0,2,1,1,2,0,1,2,2,2,1,0,2,1,2,2,0,1,2,0,1,2,2,0,1,2,1,1,2,2,0,2,1,2,1,2,0,1,2,1,1,2,2,2,2,2,2,2,1,2,2,2,0,2,1,2,2,2,1,0,2,1,1,1,2,2,0,2,2,2…	BE050768,CC829379,CC829380	CC829380	chr01	21646826	Consistent
207	mmp135	sk	-	chr01	66.5	0	-	-	MMP	1,0,1,0,0,0,2,2,0,1,1,1,0,1,1,2,2,1,0,1,2,0,1,1,0,1,1,2,2,0,1,2,2,1,2,2,1,1,0,2,1,0,1,2,2,2,1,1,0,2,1,1,0,2,2,2,1,1,1,0,0,1,2,0,0,0,1,0,2,1,2,2,0,0,1,1,2,2,0,1,2,1,2,1,1,0,1,1,2,1,1,2,0,2,2,0,0,1,1,0,1,1,1,0,0,2,2,0,1,1,1,0,0,1,0,1,0,0,2,2,2,1,0,1,1,0,1,1,1,2,0,2,1,1,2,0,1,2,2,2,1,0,0,1,2,2,0,1,1,0,1,2,2,0,1,2,1,1,2,2,0,2,1,2,1,2,0,1,2,1,1,2,2,2,2,2,2,2,1,2,2,2,1,2,1,2,2,1,1,0,2,1,1,1,2,2,0,0,2,2…	CC754079,AZ916085,CC754080,CC826105,CC826106	AZ916085	chr01	22915661	Consistent
208	gnp_QCN25h03a	mu	mmp135	chr01	66.5	0.4	-	-	Genoplante Map	0,0,0,0,2,0,2,2,0,1,0,1,0,1,1,2,2,0,0,1,2,0,1,1,0,1,1,2,2,1,1,2,2,1,0,0,1,0,0,0,0,0,1,2,0,0,1,1,0,2,1,0,0,2,0,2,1,0,0,0,0,1,2,0,0,0,0,0,2,1,0,2,0,0,0,0,0,0,0,0,0,0,0,0,0,0,0,0,0,0,0,0,0,0,0,0,0,0,0,0,0,0,0,0,0,0,0,0,0,0,0,0,0,0,0,0,0,0,0,0,0,0,0,0,0,0,0,0,0,0,0,0,0,0,0,0,0,0,0,0,0,0,0,0,0,0,0,0,0,0,0,0,0,0,0,0,0,0,0,0,0,0,0,0,0,0,0,0,0,0,0,0,0,0,0,0,0,0,0,0,0,0,0,0,0,0,0,0,0,0,0,0,0,0,0,0,0,0,0,0…	CF054177	CF054177	chr01	22963823	Consistent
209	bnlg1127	mu	mmp135	chr01	66.5	0	-	-	MMP	0,0,1,0,2,0,2,2,1,1,0,1,1,1,1,2,2,1,2,1,2,2,1,1,2,1,1,2,2,1,1,2,2,1,2,2,1,1,2,0,1,1,1,2,2,0,1,1,0,2,1,1,2,2,2,2,1,1,1,0,0,1,2,1,0,0,0,0,2,1,0,2,0,0,1,0,0,2,0,1,2,1,2,0,0,2,0,1,0,1,1,2,0,2,2,0,0,1,1,0,1,0,0,1,2,2,0,0,0,0,0,1,0,0,2,0,1,2,0,2,0,0,0,0,0,0,0,0,1,2,0,2,1,0,0,0,0,2,0,2,1,0,2,1,2,2,0,1,1,0,1,2,2,0,2,2,1,0,2,2,0,2,1,2,0,0,0,1,2,1,1,2,2,2,0,2,2,2,1,2,2,2,1,2,1,2,0,1,1,0,0,0,1,1,0,2,0,1,2,2…	-	-	-	-	-
210	umc2226	mu	mmp135	chr01	66.5	0	-	-	MMP	1,0,1,0,2,0,2,2,1,1,1,1,1,1,1,2,2,1,2,1,2,2,1,1,0,1,1,2,2,0,1,2,2,1,2,2,1,1,0,2,1,1,1,2,2,2,0,1,0,0,0,1,0,2,0,2,1,1,1,0,0,1,2,2,0,0,1,0,0,1,2,2,0,0,1,1,2,2,0,1,2,1,2,1,0,2,1,0,2,1,1,2,0,2,0,0,0,1,1,0,0,0,1,1,2,0,2,0,1,1,0,1,0,1,1,1,1,2,2,2,2,1,2,1,0,0,1,1,1,2,0,2,1,0,0,0,0,2,2,2,1,0,1,1,2,2,0,1,1,0,1,2,2,0,1,2,1,1,1,2,0,2,1,2,1,0,0,1,2,1,1,2,2,2,2,2,2,2,1,2,2,2,1,2,1,2,2,1,1,0,2,1,0,0,2,2,0,1,0,2…	AY105323,CC737990	-	-	-	-
211	bnlg1953	mu	mmp135	chr01	66.5	0.8	-	-	MMP	2,0,1,0,2,0,2,2,1,1,1,1,1,1,1,2,2,1,2,1,2,2,1,1,2,1,1,2,2,1,1,2,2,0,2,2,1,0,2,2,1,1,1,2,2,2,1,1,0,2,1,1,2,2,2,2,0,1,1,0,0,1,2,0,0,0,1,0,2,1,2,2,0,2,2,2,2,2,0,1,2,0,2,1,1,2,1,1,2,1,1,2,0,2,2,0,0,1,1,0,1,0,1,1,2,2,2,0,2,1,1,1,0,1,1,1,1,2,2,2,2,0,2,1,1,2,1,1,1,2,0,2,1,1,2,0,1,2,2,2,1,0,2,1,2,2,0,0,1,0,1,2,2,0,2,2,1,1,2,2,0,2,1,2,1,2,0,1,2,1,1,2,2,2,2,2,2,2,1,2,2,2,1,2,1,2,2,0,1,0,2,1,1,1,1,2,0,1,2,2…	CC741386	-	-	-	-
212	gnp_QAE4d02	mu	mmp135	chr01	66.5	1.3	-	-	Genoplante Map	2,0,0,0,2,0,2,2,0,1,0,1,0,1,1,2,2,0,0,1,2,2,1,1,0,1,1,2,2,1,0,2,2,1,0,0,1,0,0,0,0,0,1,2,0,0,1,1,0,2,1,0,0,2,0,2,1,0,0,0,0,1,2,0,0,0,0,0,2,1,0,2,0,0,0,0,0,0,0,0,0,0,0,0,0,0,0,0,0,0,0,0,0,0,0,0,0,0,0,0,0,0,0,0,0,0,0,0,0,0,0,0,0,0,0,0,0,0,0,0,0,0,0,0,0,0,0,0,0,0,0,0,0,0,0,0,0,0,0,0,0,0,0,0,0,0,0,0,0,0,0,0,0,0,0,0,0,0,0,0,0,0,0,0,0,0,0,0,0,0,0,0,0,0,0,0,0,0,0,0,0,0,0,0,0,0,0,0,0,0,0,0,0,0,0,0,0,0,0,0…	CX129452	CX129452	chr01	23664765	Consistent
213	MAGI_56716	mu	mmp135	chr01	66.5	0.1	-	SNP	ISU SNP Map	2,1,0,2,2,2,2,2,0,1,1,1,1,1,1,2,2,0,0,1,2,2,1,1,2,1,1,2,2,1,1,2,2,1,0,0,1,1,0,0,1,1,1,2,2,2,1,1,2,2,1,1,2,2,2,2,1,0,0,1,1,1,2,0,1,2,1,0,0,1,2,2,1,2,1,1,0,2,1,1,2,0,2,1,1,2,1,1,2,1,1,2,2,2,2,1,1,1,1,1,1,1,0,1,2,2,2,2,1,0,1,1,1,1,1,1,1,2,0,2,2,1,2,1,0,0,1,1,1,2,1,2,0,1,0,1,1,2,2,0,0,1,2,1,0,2,1,1,1,2,1,0,2,2,1,2,1,0,0,0,2,2,0,2,0,2,1,1,2,0,0,0,2,0,2,2,2,0,1,2,2,2,1,2,1,2,1,1,0,2,1,2,1,1,2,2,2,1,2,2…	MAGIv3.1_56716	MAGIv3.1_56716	chr01	22765072	Consistent
214	MAGI_76370	mu	mmp135	chr01	66.5	0	-	SNP	ISU SNP Map	2,1,0,2,2,2,2,2,0,1,0,1,1,1,1,2,2,0,0,1,2,2,1,1,2,1,1,2,2,1,1,2,2,1,0,0,1,1,0,0,1,1,1,2,2,2,1,1,2,2,1,1,2,2,2,2,1,0,0,1,1,1,2,0,1,2,0,0,0,1,2,2,1,2,1,1,0,2,1,1,2,0,2,1,1,2,1,1,0,1,1,2,2,0,2,1,1,1,1,1,1,1,0,1,2,2,2,2,1,0,1,1,1,1,1,1,1,2,0,2,0,1,2,1,0,0,1,1,1,2,1,2,0,1,0,1,1,2,2,0,1,1,2,1,0,2,1,1,1,0,1,0,2,2,1,2,1,0,0,0,0,2,0,2,2,2,1,1,2,0,0,0,2,0,2,2,2,0,1,2,2,2,1,0,1,2,1,1,0,2,1,2,1,1,2,2,2,1,2,2…	MAGIv3.1_76370	MAGIv3.1_76370	chr01	23003372	Consistent
215	MAGI_17721	mu	mmp135	chr01	66.5	1.7	-	SNP	ISU SNP Map	2,1,0,2,2,2,2,2,0,1,1,1,1,1,1,2,2,0,0,1,2,2,1,1,2,1,1,2,2,1,1,2,2,1,0,0,1,1,0,0,1,1,1,2,2,2,1,1,2,2,1,1,2,2,2,2,1,0,0,1,1,1,2,0,1,2,1,0,0,1,2,2,1,2,1,1,0,2,1,1,2,0,2,1,1,2,1,1,2,1,1,2,2,2,2,1,1,1,1,1,1,1,0,1,2,2,2,2,1,0,1,1,1,1,1,1,1,2,0,2,2,1,2,1,0,0,1,1,1,2,1,2,0,1,0,1,1,2,2,0,1,1,2,1,0,2,1,1,1,2,1,0,2,2,1,2,1,0,0,0,2,2,0,2,2,2,1,1,2,0,0,0,2,0,2,2,2,0,1,2,2,2,1,2,1,2,1,1,0,2,1,2,1,1,2,2,2,1,2,2…	MAGIv3.1_17721	MAGIv3.1_17721	chr01	22601498	Consistent
216	IDP8987	mu	mmp135	chr01	66.5	1.1	Dominant	+/-	ISU Map7	1,1,2,2,2,2,2,2,0,1,1,1,1,1,1,2,2,0,0,1,2,2,1,1,2,1,1,2,2,1,1,2,2,1,0,0,1,1,0,2,1,1,1,2,2,2,1,1,2,2,1,1,2,2,2,2,1,0,0,1,1,1,2,0,1,2,1,2,0,1,2,2,1,2,2,2,0,2,1,2,2,0,2,1,1,2,1,1,2,1,1,2,2,2,2,1,1,1,1,1,1,1,0,1,2,2,2,2,1,0,1,1,1,1,1,1,1,2,0,2,2,1,2,1,0,0,1,1,1,2,1,2,0,1,0,1,0,2,2,0,1,2,2,1,2,2,1,1,1,2,1,0,2,2,1,2,1,0,2,2,2,2,0,2,2,2,1,1,2,0,0,0,2,0,2,2,2,0,1,2,2,2,2,2,1,2,1,1,0,2,1,2,1,1,1,2,2,1,2,2…	MAGIv4.0_32722	MAGIv4.0_32722	chr01	21972980	Consistent
217	TIDP8795	mu	mmp135	chr01	66.5	1.1	Co-Dominant	TGCE	ISU Map7	0,0,0,0,2,0,2,2,0,1,0,1,0,1,1,2,2,0,0,1,2,0,1,1,0,1,1,2,2,1,1,2,2,1,0,0,1,1,0,0,1,0,1,2,0,2,1,1,0,2,1,0,2,2,0,2,1,0,1,0,0,1,2,0,0,0,0,0,1,1,2,2,0,2,0,0,0,0,0,0,0,0,0,0,0,0,0,0,0,0,0,0,0,0,0,0,0,0,0,0,0,0,0,0,0,0,0,0,0,0,0,0,0,0,0,0,0,0,0,0,0,0,0,0,0,0,0,0,0,0,0,0,0,0,0,0,0,0,0,0,0,0,0,0,0,0,0,0,0,0,0,0,0,0,0,0,0,0,0,0,0,0,0,0,0,0,0,0,0,0,0,0,0,0,0,0,0,0,0,0,0,0,0,0,0,0,0,0,0,0,0,0,0,0,0,0,0,0,0,0…	MAGIv3.1_11635	MAGIv3.1_11635	chr01	22405460	Consistent
218	IDP7226	mu	mmp135	chr01	66.5	2	Co-Dominant	Size	ISU Map7	1,1,0,2,2,2,2,2,0,1,1,1,1,1,1,2,2,0,0,1,2,2,1,1,2,1,1,2,2,1,1,2,2,1,0,0,1,1,0,2,1,1,1,2,2,2,1,1,2,2,1,1,2,2,2,2,1,0,0,1,1,1,2,0,1,2,1,2,0,1,2,2,2,2,1,1,0,2,1,1,2,0,2,1,1,2,1,1,2,1,1,2,2,2,2,2,1,1,1,1,1,1,0,1,2,2,2,1,2,0,1,1,1,1,1,1,1,2,0,2,2,1,2,1,0,0,1,1,1,2,1,2,0,1,0,1,1,2,2,0,1,1,2,1,2,2,1,2,1,2,1,0,2,2,2,2,1,0,0,0,2,2,0,2,2,2,1,1,2,0,0,0,2,0,2,2,2,0,1,2,2,2,1,2,1,2,1,1,0,2,1,1,2,2,2,1,2,2,1,1…	MAGIv3.1_108901	MAGIv3.1_108901	chr01	23699662	Consistent
219	IDP4205	sk	-	chr01	68.5	0	Co-Dominant	Size	ISU Map7	1,1,0,2,2,2,2,2,0,1,1,1,1,2,1,2,2,0,0,1,2,2,1,1,2,1,1,2,2,1,1,2,2,1,0,0,2,1,0,2,1,1,1,2,2,2,1,1,1,2,1,1,2,2,2,2,1,0,0,1,1,1,2,0,1,2,1,2,0,1,1,2,2,2,1,1,0,2,1,1,2,0,2,1,1,1,1,0,2,1,1,2,2,2,2,1,1,1,1,1,1,1,0,1,1,2,2,1,2,0,1,1,1,1,1,1,1,2,0,2,1,1,2,1,0,0,1,1,1,2,1,2,0,1,0,1,1,2,2,0,1,1,1,1,2,2,1,2,1,2,1,0,2,2,2,0,1,0,0,0,2,2,0,2,2,2,1,1,2,0,0,0,2,0,2,2,2,0,1,2,2,2,1,2,1,1,1,1,0,2,1,2,1,1,1,2,1,1,2,2…	MAGIv3.1_74479	MAGIv3.1_74479	chr01	24697057	Consistent
220	gnp_QAE35f05	sk	-	chr01	68.5	0	-	-	Genoplante Map	1,0,0,0,2,0,2,2,0,1,0,1,0,2,1,2,2,0,0,1,2,2,1,1,0,1,1,2,2,1,1,2,2,1,0,0,2,0,0,0,0,0,1,2,0,0,0,1,0,2,1,0,0,2,0,2,1,0,0,0,0,1,2,0,0,0,0,0,2,1,0,2,0,0,0,0,0,0,0,0,0,0,0,0,0,0,0,0,0,0,0,0,0,0,0,0,0,0,0,0,0,0,0,0,0,0,0,0,0,0,0,0,0,0,0,0,0,0,0,0,0,0,0,0,0,0,0,0,0,0,0,0,0,0,0,0,0,0,0,0,0,0,0,0,0,0,0,0,0,0,0,0,0,0,0,0,0,0,0,0,0,0,0,0,0,0,0,0,0,0,0,0,0,0,0,0,0,0,0,0,0,0,0,0,0,0,0,0,0,0,0,0,0,0,0,0,0,0,0,0…	CD973524	CD973524	chr01	24681236	Consistent
221	MAGI_55490	mu	gnp_QAE35f05	chr01	68.5	1.9	-	SNP	ISU SNP Map	1,1,0,2,2,2,2,2,0,1,2,1,1,2,1,2,2,0,0,1,2,2,1,1,2,1,1,2,2,1,1,2,2,1,0,0,1,1,0,0,1,1,1,2,2,2,1,1,2,2,1,1,2,2,2,2,1,0,0,1,1,1,2,0,1,2,0,0,0,1,2,2,2,2,2,2,0,2,1,1,2,0,2,1,1,1,1,1,2,1,1,2,2,0,2,1,1,1,1,1,1,1,0,1,1,2,2,1,2,0,1,1,1,1,1,1,1,2,0,2,0,1,2,1,0,0,1,1,1,2,1,2,0,1,0,1,1,2,2,0,1,2,1,1,0,2,1,2,1,0,1,0,2,2,2,1,1,0,0,0,2,2,0,2,2,2,1,1,2,0,0,0,2,0,2,2,2,0,1,2,2,2,1,0,1,1,1,1,0,2,1,2,1,1,1,2,1,1,2,2…	MAGIv3.1_55490	MAGIv3.1_55490	chr01	24319919	Consistent
222	IDP7945	mu	gnp_QAE35f05	chr01	68.5	2.6	Dominant	-/+	ISU Map7	1,1,0,2,2,2,2,2,0,1,1,1,1,2,1,2,2,0,0,1,2,2,1,1,2,1,1,2,2,1,1,2,2,1,0,0,2,1,0,2,1,1,1,2,2,2,1,1,1,2,1,1,2,2,2,2,1,0,0,1,1,1,2,0,1,2,1,2,0,2,1,2,2,2,1,1,0,2,1,1,2,0,2,1,1,1,1,1,2,1,1,2,2,2,2,1,1,1,1,1,1,1,0,1,1,2,0,0,0,0,0,0,0,0,0,0,0,0,0,0,0,0,0,0,0,0,0,0,0,0,0,0,0,0,0,0,0,0,0,0,0,0,0,0,0,0,0,0,0,0,0,0,0,0,0,0,0,0,0,0,0,0,0,0,0,0,0,0,0,0,0,0,0,0,0,0,0,0,0,0,0,0,0,0,0,0,0,0,0,0,0,0,0,0,0,0,0,0,0,0…	MAGIv3.1_19247	MAGIv3.1_19247	chr09	144476034	Inconsistent
223	IDP466	sk	-	chr01	70.1	0	Dominant	-/+	ISU Map7	1,1,2,2,2,2,2,2,0,1,1,1,1,2,1,2,2,0,0,1,2,2,1,1,2,1,1,2,2,1,1,2,2,1,0,0,2,1,0,2,1,2,1,2,2,1,1,1,1,2,1,1,2,2,2,2,1,0,0,1,2,1,2,0,1,2,1,2,0,1,1,2,2,2,2,2,0,2,1,2,2,0,2,1,1,1,1,1,2,1,1,2,2,2,2,1,1,1,1,1,1,1,0,1,2,2,1,1,2,0,1,1,1,1,1,1,1,2,0,2,1,1,2,2,0,0,1,1,1,2,1,2,0,1,0,1,2,2,2,0,1,2,1,1,2,2,1,2,1,2,1,0,2,2,2,2,1,0,0,0,2,2,0,2,2,2,1,1,2,0,0,0,2,0,2,2,2,0,1,2,1,2,1,2,1,1,2,2,0,2,2,2,2,1,2,2,1,1,2,2…	MEC_96730_P95-Mar06	-	-	-	-
224	IDP4991	mu	IDP466	chr01	70.1	1.9	Dominant	+/-	ISU Map7	1,1,2,2,2,2,2,2,0,1,1,2,1,2,1,2,2,0,0,1,2,2,1,2,2,1,1,2,2,1,1,2,2,1,0,0,2,1,0,2,1,2,1,2,2,1,1,1,1,2,1,1,2,2,2,2,1,0,0,1,2,1,2,0,1,2,1,2,0,2,1,2,2,2,2,2,0,2,1,1,2,0,2,1,1,1,1,1,2,1,1,2,2,2,2,1,1,1,1,1,1,1,0,1,1,2,1,1,2,0,1,1,1,2,1,1,1,2,0,2,1,1,2,2,0,0,1,1,1,2,1,2,0,2,0,1,2,2,2,0,1,2,1,1,2,2,1,2,1,2,1,0,2,2,2,1,1,0,0,0,2,2,0,2,2,2,1,1,2,0,0,0,2,0,2,2,2,0,1,2,1,2,1,2,1,1,2,2,0,2,2,2,1,1,1,2,1,1,2,2…	MAGIv3.1_57618	MAGIv3.1_57618	chr01	25004388	Consistent
225	IDP7812	mu	IDP466	chr01	70.1	0.7	Dominant	+/-	ISU Map7	1,1,2,2,2,2,2,2,0,1,1,1,1,2,1,2,2,0,0,1,2,2,1,1,2,1,1,2,2,1,1,2,2,1,0,0,2,1,0,2,1,2,1,2,2,1,1,1,1,2,1,1,2,2,2,2,1,0,0,1,2,1,2,0,1,2,1,2,0,1,1,2,2,2,2,2,0,2,1,1,2,0,2,1,1,1,1,1,2,1,1,2,2,2,2,1,1,1,1,1,1,1,0,1,2,2,1,1,2,0,1,1,1,1,1,1,2,2,0,2,1,1,2,2,0,0,1,1,1,2,1,2,0,1,0,1,2,2,2,0,1,2,1,1,2,2,1,2,1,2,1,0,2,2,2,1,1,0,0,0,2,2,0,2,2,2,1,1,2,0,0,0,2,0,2,2,2,0,1,2,1,2,1,2,1,2,1,2,0,2,2,2,1,1,1,2,1,1,2,2…	MAGIv3.1_5146	MAGIv3.1_5146	chr01	24904231	Consistent
226	IDP6976	sk	-	chr01	70.5	0	Co-Dominant	Size	ISU Map7	1,0,0,0,2,0,2,2,0,1,0,1,0,2,1,2,2,0,0,1,2,2,1,1,0,1,1,2,2,1,1,2,2,1,0,0,2,1,0,0,1,0,1,2,0,1,1,1,0,2,1,0,2,2,0,2,1,0,1,0,0,1,2,0,0,0,0,0,1,1,1,2,0,2,0,0,0,0,0,0,0,0,0,0,0,0,0,0,0,0,0,0,0,0,0,0,0,0,0,0,0,0,0,0,0,0,0,0,0,0,0,0,0,0,0,0,0,0,0,0,0,0,0,0,0,0,0,0,0,0,0,0,0,0,0,0,0,0,0,0,0,0,0,0,0,0,0,0,0,0,0,0,0,0,0,0,0,0,0,0,0,0,0,0,0,0,0,0,0,0,0,0,0,0,0,0,0,0,0,0,0,0,0,0,0,0,0,0,0,0,0,0,0,0,0,0,0,0,0,0…	MAGIv3.1_1243	MAGIv3.1_1243	chr01	25264231	Consistent
227	IDP4337	sk	-	chr01	71.2	0	Dominant	+/-	ISU Map7	1,0,0,0,2,0,2,2,0,1,0,1,0,2,1,2,2,0,0,1,2,2,1,1,0,1,1,2,2,1,1,2,1,1,0,0,2,1,0,0,1,0,1,1,0,1,1,1,0,2,1,0,2,2,0,2,1,0,1,0,0,1,2,0,0,0,0,0,1,1,1,2,0,2,0,0,0,0,0,0,0,0,0,0,0,0,0,0,0,0,0,0,0,0,0,0,0,0,0,0,0,0,0,0,0,0,0,0,0,0,0,0,0,0,0,0,0,0,0,0,0,0,0,0,0,0,0,0,0,0,0,0,0,0,0,0,0,0,0,0,0,0,0,0,0,0,0,0,0,0,0,0,0,0,0,0,0,0,0,0,0,0,0,0,0,0,0,0,0,0,0,0,0,0,0,0,0,0,0,0,0,0,0,0,0,0,0,0,0,0,0,0,0,0,0,0,0,0,0,0…	MAGIv3.1_108921	MAGIv3.1_108921	chr01	26441107	Consistent
228	MAGI_108922	mu	IDP4337	chr01	71.2	0.3	-	SNP	ISU SNP Map	1,1,0,2,2,2,2,2,0,1,1,1,1,2,1,2,2,0,0,1,2,0,1,0,2,1,1,2,2,1,1,2,1,1,0,0,2,1,0,0,1,2,1,1,1,1,1,0,0,2,1,1,2,2,2,2,1,0,0,1,2,1,2,0,1,2,1,0,0,0,1,2,2,2,2,0,0,2,1,1,2,0,2,1,1,1,1,1,2,1,1,2,1,2,2,1,1,1,1,1,1,1,0,1,1,2,1,1,2,0,1,1,1,1,1,1,1,2,0,2,1,1,0,2,0,0,1,1,1,2,1,2,0,1,0,1,2,2,2,0,1,2,1,1,0,2,1,2,1,2,1,0,2,2,0,1,1,0,0,0,1,2,0,1,2,2,1,1,2,0,0,0,2,0,2,2,2,0,1,2,1,2,1,2,1,1,2,2,0,2,2,2,1,1,1,2,1,1,2,2…	MAGIv3.1_108922	MAGIv3.1_108922	chr01	26442800	Consistent
229	MAGI_39411	mu	IDP4337	chr01	71.2	1.4	-	SNP	ISU SNP Map	1,1,0,2,2,2,2,2,0,1,1,1,1,2,1,2,2,0,0,1,2,2,1,1,2,1,1,2,2,1,1,2,1,1,0,0,2,1,0,0,1,2,1,1,1,1,1,1,1,2,1,1,2,2,2,2,1,0,0,1,2,1,2,0,1,2,1,0,0,1,1,2,2,2,1,1,0,2,1,1,2,0,2,1,1,1,1,1,2,1,1,2,1,2,2,1,1,1,1,1,1,1,0,1,1,2,1,1,2,0,1,1,1,1,1,1,1,2,0,2,1,1,2,2,0,0,1,1,1,2,1,2,0,1,0,1,2,2,2,0,1,1,1,1,0,2,1,2,1,2,1,0,2,2,2,1,1,0,0,0,0,2,0,1,2,2,1,1,2,0,0,0,2,0,2,2,2,0,1,2,1,2,1,2,1,1,2,2,0,2,2,2,1,1,1,2,1,1,2,2…	MAGIv3.1_39411	MAGIv3.1_39411	chr01	26283872	Consistent
230	MAGI_33759	mu	IDP4337	chr01	71.2	0	-	SNP	ISU SNP Map	1,1,0,2,2,2,2,2,0,1,1,1,1,2,1,2,2,0,0,1,2,2,1,1,2,1,1,2,2,1,1,2,1,1,0,0,2,1,0,0,1,2,1,1,1,1,1,1,1,2,1,1,0,2,2,2,1,0,0,1,2,1,2,0,1,2,1,0,0,1,1,2,2,2,0,0,0,2,1,1,2,0,2,1,1,1,1,1,2,1,1,2,1,2,2,1,1,1,1,1,1,1,0,1,1,2,1,1,2,0,1,1,1,1,1,1,1,2,0,2,1,1,2,2,0,0,1,1,1,2,1,2,0,1,0,1,2,2,2,0,1,0,1,1,0,2,1,2,1,2,1,0,2,2,2,1,1,0,0,0,1,2,0,1,2,2,1,1,2,0,0,0,2,0,2,2,2,0,1,2,1,2,1,2,1,1,2,2,0,2,2,2,1,1,1,2,1,1,2,2…	MAGIv3.1_33759	MAGIv3.1_33759	chr01	26408708	Consistent
231	npi403b	mu	IDP4337	chr01	71.2	2	-	-	MMP	0,0,0,0,0,0,0,0,0,0,0,0,0,0,0,0,0,0,0,0,1,2,1,1,2,1,2,2,2,1,1,2,1,1,1,2,2,1,2,2,1,2,1,1,1,1,1,1,0,2,0,1,2,2,2,2,1,1,1,0,0,1,2,2,0,0,1,0,2,1,1,2,0,0,1,1,2,2,0,1,2,2,2,1,1,1,1,1,2,1,2,2,0,2,2,0,0,1,1,0,0,0,1,0,0,2,2,0,0,0,0,1,0,0,1,1,1,2,0,0,1,1,2,2,0,0,1,1,1,2,0,2,2,1,2,0,2,2,2,2,1,0,0,1,2,2,0,2,1,0,1,2,2,0,2,0,1,1,2,2,0,2,2,1,2,2,0,1,2,2,1,2,2,2,2,2,2,2,1,2,1,2,1,2,1,1,2,2,1,0,2,2,1,1,1,2,0,1,2,2…	-	-	-	-	-
232	IDP7385	mu	IDP4337	chr01	71.2	1.4	Dominant	+/-	ISU Map7	1,1,2,2,2,2,2,2,0,1,1,2,1,2,2,2,2,0,0,1,2,2,1,1,2,1,2,2,2,2,1,2,1,1,0,0,2,1,0,2,1,2,1,1,1,1,1,1,1,2,1,1,2,2,2,2,1,0,0,1,2,1,2,0,1,2,1,2,0,1,1,2,2,2,1,1,0,2,1,1,2,0,2,1,2,1,1,1,2,1,2,2,1,2,2,1,1,1,1,1,2,1,0,2,2,2,1,1,2,0,1,1,1,1,1,2,1,2,0,2,1,1,2,2,0,0,1,1,2,2,1,2,0,1,0,1,2,2,2,0,1,1,1,1,2,2,1,2,1,2,1,0,2,2,2,1,1,0,2,2,1,2,0,1,2,2,2,1,2,0,0,0,2,0,2,2,2,0,1,2,1,2,1,2,1,1,2,2,0,2,2,2,1,1,1,2,2,1,2,2…	MAGIv3.1_20558	-	-	-	-
233	TIDP3342	mu	IDP4337	chr01	71.2	0.7	Co-Dominant	TGCE	ISU Map7	1,0,0,0,2,0,2,2,0,1,0,1,0,2,2,2,2,0,0,1,2,2,1,1,0,1,2,2,2,1,1,2,1,1,0,0,2,1,0,0,1,0,1,1,0,1,1,1,0,2,1,0,2,2,0,2,1,0,1,0,0,1,2,0,0,0,0,0,2,1,1,2,0,2,0,0,0,0,0,0,0,0,0,0,0,0,0,0,0,0,0,0,0,0,0,0,0,0,0,0,0,0,0,0,0,0,0,0,0,0,0,0,0,0,0,0,0,0,0,0,0,0,0,0,0,0,0,0,0,0,0,0,0,0,0,0,0,0,0,0,0,0,0,0,0,0,0,0,0,0,0,0,0,0,0,0,0,0,0,0,0,0,0,0,0,0,0,0,0,0,0,0,0,0,0,0,0,0,0,0,0,0,0,0,0,0,0,0,0,0,0,0,0,0,0,0,0,0,0,0…	MAGIv3.1_20885	MAGIv3.1_20885	chr01	26685532	Consistent
234	IDP2552	mu	IDP4337	chr01	71.2	1.2	Dominant	-/+	ISU Map7	1,1,0,2,2,2,2,2,0,1,1,1,1,2,2,2,2,0,0,1,2,2,1,1,2,1,2,2,2,1,1,2,1,1,0,0,2,1,0,2,1,2,1,1,1,1,1,1,1,2,1,1,2,2,2,2,1,0,0,1,2,1,2,0,1,2,1,2,0,2,1,2,2,2,2,2,0,2,1,1,2,0,2,1,1,1,1,1,2,1,2,2,1,2,2,1,1,1,1,1,1,1,0,1,1,2,1,1,2,0,1,1,1,1,1,1,1,2,0,2,1,1,2,2,0,0,1,1,1,2,1,2,0,1,0,1,2,2,2,0,1,2,1,1,2,2,1,2,1,2,1,0,2,2,2,2,1,0,0,0,1,2,0,1,2,2,2,1,2,0,0,0,2,0,2,2,2,0,1,2,1,2,1,2,1,1,2,2,0,2,2,2,0,1,2,2,1,1,2,2…	AI734481	-	-	-	-
235	IDP4750	mu	IDP4337	chr01	71.2	2.4	Dominant	+/-	ISU Map7	1,1,2,2,2,2,2,2,0,1,1,1,1,2,2,2,2,0,0,1,2,2,1,1,2,1,2,2,2,1,1,2,1,1,0,0,2,1,0,2,1,2,1,1,1,1,1,1,1,2,1,1,2,2,2,2,1,0,0,2,2,1,2,0,1,2,1,2,0,1,1,2,2,2,2,2,0,2,1,1,2,0,2,2,2,1,2,1,2,1,2,2,2,2,2,1,1,1,1,1,1,1,0,1,1,2,1,1,2,0,1,1,1,1,1,1,1,2,0,2,1,1,2,2,0,0,1,1,1,2,1,2,0,1,0,1,2,2,2,0,1,2,1,1,2,2,1,2,1,2,1,0,2,2,2,1,1,0,2,2,1,2,0,1,2,2,2,1,2,0,0,0,2,0,2,2,2,0,1,2,1,2,1,2,1,1,2,2,0,2,2,2,2,1,2,2,1,1,2,2…	MAGIv3.1_15013	MAGIv3.1_15013	chr01	27016563	Consistent
236	IDP7435	mu	IDP4337	chr01	71.2	1.7	Dominant	+/-	ISU Map7	1,1,2,2,2,2,2,2,0,1,1,1,1,2,1,2,2,0,0,1,2,2,1,1,2,1,1,2,2,1,1,2,1,1,0,0,2,1,0,2,1,2,1,1,1,1,1,1,1,2,1,1,2,2,2,2,2,0,0,2,2,1,2,0,1,2,1,2,0,1,1,2,2,2,2,2,0,2,1,1,2,0,2,2,1,1,1,1,2,1,1,2,1,2,2,1,1,1,1,2,1,1,0,1,1,2,1,1,2,0,1,1,1,1,1,1,1,2,0,2,1,1,2,2,0,0,1,1,1,2,1,2,0,1,0,1,2,2,2,0,1,2,1,1,2,2,1,2,2,2,1,0,2,2,2,1,1,0,2,2,1,2,0,1,2,2,1,1,2,0,0,0,2,0,2,2,2,0,1,2,1,2,1,2,1,1,2,2,0,1,2,2,1,1,1,2,1,1,2,2…	MAGIv3.1_72687	-	-	-	-
237	IDP4048	sk	-	chr01	71.9	0	Dominant	+/-	ISU Map7	1,1,0,2,2,2,2,2,0,1,1,1,1,2,1,2,2,0,0,1,2,2,1,1,2,1,1,2,2,1,1,2,1,1,0,0,2,1,0,2,1,2,1,1,1,1,1,1,1,2,1,1,2,2,2,2,1,0,0,1,2,1,2,0,1,2,1,2,0,1,1,2,2,2,1,1,0,2,1,1,2,0,2,1,1,1,1,1,2,1,1,2,1,2,2,1,1,1,1,1,1,1,0,1,1,2,1,1,2,0,1,1,1,1,1,1,1,2,0,2,1,1,2,2,0,0,1,1,1,2,1,2,0,1,0,1,2,2,2,0,1,1,1,1,2,2,1,2,1,2,1,0,2,2,2,1,1,0,0,0,1,2,0,1,2,2,1,1,2,0,0,0,2,0,2,2,2,0,1,2,1,2,1,2,1,1,2,2,0,2,2,2,1,1,1,2,1,1,2,2…	MAGIv3.1_105455	MAGIv3.1_105455	chr09	142859783	Inconsistent
238	TIDP6152	mu	IDP4048	chr01	71.9	3.8	Co-Dominant	TGCE	ISU Map7	1,0,0,0,2,0,2,1,0,1,0,1,0,2,2,2,2,0,0,1,2,2,1,1,0,1,2,2,2,1,1,1,2,1,0,0,2,1,0,0,1,0,1,1,0,1,1,1,0,2,1,0,2,2,0,2,1,0,1,0,0,1,2,0,0,0,0,0,1,1,1,1,0,2,0,0,0,0,0,0,0,0,0,0,0,0,0,0,0,0,0,0,0,0,0,0,0,0,0,0,0,0,0,0,0,0,0,0,0,0,0,0,0,0,0,0,0,0,0,0,0,0,0,0,0,0,0,0,0,0,0,0,0,0,0,0,0,0,0,0,0,0,0,0,0,0,0,0,0,0,0,0,0,0,0,0,0,0,0,0,0,0,0,0,0,0,0,0,0,0,0,0,0,0,0,0,0,0,0,0,0,0,0,0,0,0,0,0,0,0,0,0,0,0,0,0,0,0,0,0…	MAGIv3.1_88539	MAGIv3.1_88539	chr01	27175771	Consistent
239	IDP810	sk	-	chr01	76.3	0	Co-Dominant	Size	ISU Map7	1,1,0,2,1,2,2,1,0,1,1,1,1,2,2,2,2,0,0,1,2,2,1,1,2,1,2,2,2,1,1,1,1,1,0,0,2,1,0,2,1,2,2,1,1,1,1,1,1,1,1,2,2,1,1,0,1,0,0,1,2,1,2,0,1,2,1,2,0,1,1,1,2,2,2,2,0,1,1,1,2,0,2,1,1,2,1,1,2,1,2,2,1,1,2,1,0,1,1,1,1,1,0,1,1,2,1,1,2,0,1,0,1,0,1,1,1,1,0,2,1,1,2,2,0,0,1,1,1,2,1,1,0,1,0,1,2,2,2,0,1,2,1,1,2,2,1,2,0,2,1,0,1,2,1,1,1,0,0,0,1,2,0,1,2,1,2,1,2,0,0,0,2,0,2,1,2,0,1,2,2,2,0,2,1,1,2,2,0,2,2,2,1,1,1,2,1,1,2,2…	MAGIv3.1_3339	MAGIv3.1_3339	chr01	27607189	Consistent
240	TIDP6478	mu	IDP810	chr01	76.3	2.2	Co-Dominant	TGCE	ISU Map7	1,0,0,0,1,0,2,1,0,1,0,1,0,2,2,2,2,0,0,1,2,2,1,1,0,1,2,2,2,1,1,1,1,1,0,0,2,1,0,0,1,0,2,0,0,1,1,1,0,1,1,0,2,1,0,2,1,0,1,0,0,1,2,0,0,0,0,0,1,1,1,1,0,2,0,0,0,0,0,0,0,0,0,0,0,0,0,0,0,0,0,0,0,0,0,0,0,0,0,0,0,0,0,0,0,0,0,0,0,0,0,0,0,0,0,0,0,0,0,0,0,0,0,0,0,0,0,0,0,0,0,0,0,0,0,0,0,0,0,0,0,0,0,0,0,0,0,0,0,0,0,0,0,0,0,0,0,0,0,0,0,0,0,0,0,0,0,0,0,0,0,0,0,0,0,0,0,0,0,0,0,0,0,0,0,0,0,0,0,0,0,0,0,0,0,0,0,0,0,0…	MAGIv3.1_58766	MAGIv3.1_58766	chr01	27512025	Consistent
241	TIDP3074	mu	IDP810	chr01	76.3	0	Co-Dominant	TGCE	ISU Map7	1,0,0,0,1,0,2,1,0,1,0,1,0,2,2,2,2,0,0,1,2,2,1,1,0,1,2,2,2,1,1,1,1,1,0,0,2,1,0,0,1,0,2,1,0,1,1,1,0,1,1,0,2,1,0,2,1,0,1,0,0,1,2,0,0,0,0,0,1,1,1,1,0,0,0,0,0,0,0,0,0,0,0,0,0,0,0,0,0,0,0,0,0,0,0,0,0,0,0,0,0,0,0,0,0,0,0,0,0,0,0,0,0,0,0,0,0,0,0,0,0,0,0,0,0,0,0,0,0,0,0,0,0,0,0,0,0,0,0,0,0,0,0,0,0,0,0,0,0,0,0,0,0,0,0,0,0,0,0,0,0,0,0,0,0,0,0,0,0,0,0,0,0,0,0,0,0,0,0,0,0,0,0,0,0,0,0,0,0,0,0,0,0,0,0,0,0,0,0,0…	MAGIv3.1_31095	MAGIv3.1_31095	chr01	27493650	Consistent
242	IDP645	mu	IDP810	chr01	76.3	0	Co-Dominant	Size	ISU Map7	1,0,0,0,1,0,2,1,0,1,0,1,0,2,2,2,2,0,0,1,2,2,1,1,0,1,0,2,2,1,1,1,1,1,0,0,2,1,0,0,1,0,2,1,0,1,1,1,0,1,1,0,2,1,0,2,1,0,1,0,0,1,2,0,0,0,0,0,1,1,1,1,0,2,0,0,0,0,0,0,0,0,0,0,0,0,0,0,0,0,0,0,0,0,0,0,0,0,0,0,0,0,0,0,0,0,0,0,0,0,0,0,0,0,0,0,0,0,0,0,0,0,0,0,0,0,0,0,0,0,0,0,0,0,0,0,0,0,0,0,0,0,0,0,0,0,0,0,0,0,0,0,0,0,0,0,0,0,0,0,0,0,0,0,0,0,0,0,0,0,0,0,0,0,0,0,0,0,0,0,0,0,0,0,0,0,0,0,0,0,0,0,0,0,0,0,0,0,0,0…	MEC_87333_P95-Mar06	MEC_87333_P95-Mar06	chr01	27607244	Consistent
243	IDP4753	mu	IDP810	chr01	76.3	0.5	Co-Dominant	Size	ISU Map7	1,1,0,2,1,2,2,1,0,1,1,0,1,2,2,2,2,0,0,1,2,2,1,1,2,1,2,2,2,1,1,1,1,1,0,0,1,1,0,2,1,2,2,1,1,1,1,1,1,1,1,2,2,1,1,2,1,0,0,1,2,1,2,0,1,2,1,1,0,1,1,1,2,2,2,1,0,1,1,1,2,0,2,1,1,2,1,1,0,1,2,2,1,1,2,1,1,1,1,1,1,1,0,1,1,2,1,1,2,0,1,1,1,1,1,1,1,1,0,2,1,1,2,2,0,0,1,1,1,2,1,1,0,1,0,1,2,2,2,0,1,1,1,1,2,2,1,2,1,2,1,0,1,2,1,1,1,0,0,0,1,2,0,1,2,1,2,1,2,0,0,0,2,0,2,1,2,0,1,2,2,2,2,1,1,1,2,2,0,2,2,2,1,1,1,2,1,1,2,2…	MAGIv3.1_15494	MAGIv3.1_15494	chr01	28003593	Consistent
244	IDP8345	mu	IDP810	chr01	76.3	0.7	Co-Dominant	Size	ISU Map7	1,1,0,2,1,2,2,2,0,1,1,1,1,2,2,2,2,0,0,1,2,2,1,1,2,1,2,2,2,1,1,1,1,1,0,0,1,1,0,2,1,2,2,1,1,1,1,1,1,1,1,2,2,1,1,2,1,0,0,1,2,1,2,0,1,2,1,2,0,1,1,1,2,2,2,2,0,1,1,1,2,0,2,1,1,2,1,1,2,1,2,2,1,1,2,1,1,1,1,1,1,1,0,1,1,2,1,1,2,0,1,1,1,1,1,1,1,1,0,2,1,1,2,2,0,0,1,1,1,2,1,1,0,1,0,1,2,2,2,0,1,1,1,1,2,2,1,2,1,2,2,0,1,2,1,1,1,0,0,0,1,2,0,1,2,1,2,1,2,0,0,0,2,0,2,1,2,0,1,2,2,2,2,1,1,1,2,2,0,2,2,2,1,1,1,2,0,1,2,2…	MAGIv3.1_81330	MAGIv3.1_81330	chr01	28205367	Consistent
245	IDP4752	sk	-	chr01	77.5	0	Dominant	+/-	ISU Map7	1,1,2,2,2,2,2,1,0,1,1,1,1,2,2,2,2,0,0,1,2,2,1,1,2,1,2,2,2,1,1,1,1,1,0,0,1,1,0,2,1,2,2,1,1,1,1,1,1,1,1,2,2,1,1,2,1,0,0,1,2,1,2,0,1,2,1,2,0,1,1,1,2,2,2,1,0,1,1,1,2,0,2,1,1,2,1,1,2,1,2,2,1,1,2,1,1,1,1,1,1,1,0,1,1,2,1,1,2,0,1,1,1,1,1,1,1,1,0,2,1,1,2,2,0,0,1,1,1,2,1,1,0,1,0,1,2,2,2,0,1,1,1,1,2,2,1,2,1,2,1,0,1,2,1,1,1,0,0,0,1,2,0,1,2,1,2,1,2,0,0,0,2,0,2,1,2,0,1,2,2,2,1,1,1,1,2,2,0,2,2,2,1,1,1,2,1,1,2,2…	MAGIv3.1_15492	MAGIv3.1_15492	chr01	28005663	Consistent
246	IDP4710	mu	IDP4752	chr01	77.5	1.1	Dominant	+/-	ISU Map7	1,1,2,2,1,2,2,1,0,1,1,1,1,2,2,2,2,0,0,1,2,2,1,1,2,1,2,2,2,1,1,1,1,1,0,0,1,1,0,2,1,2,2,1,1,1,1,1,1,1,1,2,2,1,1,2,1,0,0,1,2,1,2,0,1,2,1,2,0,1,1,1,2,2,2,2,0,1,1,1,2,0,2,1,1,2,1,1,2,1,2,2,1,1,2,1,1,1,1,1,1,1,0,1,1,2,1,1,2,0,1,1,1,1,1,1,1,1,0,2,1,1,2,2,0,0,1,1,1,2,1,1,0,1,0,1,2,2,2,0,1,1,1,1,2,2,1,2,1,2,2,0,1,2,1,1,1,0,0,0,1,2,0,1,2,1,2,1,2,0,0,0,2,0,2,1,2,0,1,2,2,2,1,1,1,1,2,2,0,2,2,2,1,1,1,2,2,1,2,2…	MAGIv3.1_85250	MAGIv3.1_85250	chr01	28564053	Consistent
247	TIDP5326	mu	IDP4752	chr01	77.5	0.5	Co-Dominant	TGCE	ISU Map7	1,0,0,0,1,0,2,1,0,1,0,1,0,2,2,2,2,0,0,1,2,2,1,1,0,1,2,2,0,1,0,1,1,1,0,0,1,1,0,0,1,0,2,1,0,1,1,1,0,1,1,0,2,1,0,2,1,0,1,0,0,1,2,0,0,0,0,0,1,1,1,1,0,2,0,0,0,0,0,0,0,0,0,0,0,0,0,0,0,0,0,0,0,0,0,0,0,0,0,0,0,0,0,0,0,0,0,0,0,0,0,0,0,0,0,0,0,0,0,0,0,0,0,0,0,0,0,0,0,0,0,0,0,0,0,0,0,0,0,0,0,0,0,0,0,0,0,0,0,0,0,0,0,0,0,0,0,0,0,0,0,0,0,0,0,0,0,0,0,0,0,0,0,0,0,0,0,0,0,0,0,0,0,0,0,0,0,0,0,0,0,0,0,0,0,0,0,0,0,0…	MAGIv3.1_39818	MAGIv3.1_39818	chr01	28703912	Consistent
248	gnp_gsy290	mu	IDP4752	chr01	77.5	2.3	-	-	Genoplante Map	1,0,0,0,1,0,2,1,0,1,0,1,0,2,2,2,2,0,0,1,2,2,1,1,0,1,2,0,2,1,0,1,0,1,0,0,1,0,0,0,0,0,2,1,0,0,1,1,0,1,1,0,0,0,0,2,1,0,0,0,0,1,2,0,0,0,0,0,1,1,0,1,0,0,0,0,0,0,0,0,0,0,0,0,0,0,0,0,0,0,0,0,0,0,0,0,0,0,0,0,0,0,0,0,0,0,0,0,0,0,0,0,0,0,0,0,0,0,0,0,0,0,0,0,0,0,0,0,0,0,0,0,0,0,0,0,0,0,0,0,0,0,0,0,0,0,0,0,0,0,0,0,0,0,0,0,0,0,0,0,0,0,0,0,0,0,0,0,0,0,0,0,0,0,0,0,0,0,0,0,0,0,0,0,0,0,0,0,0,0,0,0,0,0,0,0,0,0,0,0…	D14579	D14579	chr01	28084093	Consistent
249	TIDP3174	mu	IDP4752	chr01	77.5	0	Co-Dominant	TGCE	ISU Map7	1,0,0,0,1,0,2,1,0,1,0,1,0,2,2,2,2,0,0,1,2,2,1,1,0,1,2,2,2,0,1,0,1,1,0,0,1,1,0,0,1,0,2,1,0,1,1,1,0,1,1,0,2,1,0,2,1,0,1,0,0,1,2,0,0,0,0,0,1,1,1,1,0,2,0,0,0,0,0,0,0,0,0,0,0,0,0,0,0,0,0,0,0,0,0,0,0,0,0,0,0,0,0,0,0,0,0,0,0,0,0,0,0,0,0,0,0,0,0,0,0,0,0,0,0,0,0,0,0,0,0,0,0,0,0,0,0,0,0,0,0,0,0,0,0,0,0,0,0,0,0,0,0,0,0,0,0,0,0,0,0,0,0,0,0,0,0,0,0,0,0,0,0,0,0,0,0,0,0,0,0,0,0,0,0,0,0,0,0,0,0,0,0,0,0,0,0,0,0,0…	MAGIv3.1_91483	MAGIv3.1_91483	chr01	28551576	Consistent
250	IDP7238	mu	IDP4752	chr01	77.5	0	Co-Dominant	Size	ISU Map7	1,0,0,0,1,0,2,1,0,1,0,1,0,2,2,2,2,0,0,1,2,2,1,1,0,1,2,2,2,1,1,1,1,1,0,0,1,1,0,0,1,0,2,1,0,1,1,1,0,1,1,0,2,1,0,2,1,0,1,0,0,1,2,0,0,0,0,0,1,1,1,1,0,2,0,0,0,0,0,0,0,0,0,0,0,0,0,0,0,0,0,0,0,0,0,0,0,0,0,0,0,0,0,0,0,0,0,0,0,0,0,0,0,0,0,0,0,0,0,0,0,0,0,0,0,0,0,0,0,0,0,0,0,0,0,0,0,0,0,0,0,0,0,0,0,0,0,0,0,0,0,0,0,0,0,0,0,0,0,0,0,0,0,0,0,0,0,0,0,0,0,0,0,0,0,0,0,0,0,0,0,0,0,0,0,0,0,0,0,0,0,0,0,0,0,0,0,0,0,0…	MAGIv3.1_111623	MAGIv3.1_111623	chr01	29613917	Consistent
251	gnp_gsy289a	mu	IDP4752	chr01	77.5	4.1	-	-	Genoplante Map	1,0,0,0,1,0,2,1,0,1,0,1,0,2,0,2,2,0,0,1,0,2,1,1,0,1,2,2,2,1,1,1,0,1,0,0,1,0,0,0,0,0,2,1,0,0,1,1,0,2,1,0,0,0,0,2,1,0,0,0,0,0,2,0,0,0,0,0,0,1,0,1,0,0,0,0,0,0,0,0,0,0,0,0,0,0,0,0,0,0,0,0,0,0,0,0,0,0,0,0,0,0,0,0,0,0,0,0,0,0,0,0,0,0,0,0,0,0,0,0,0,0,0,0,0,0,0,0,0,0,0,0,0,0,0,0,0,0,0,0,0,0,0,0,0,0,0,0,0,0,0,0,0,0,0,0,0,0,0,0,0,0,0,0,0,0,0,0,0,0,0,0,0,0,0,0,0,0,0,0,0,0,0,0,0,0,0,0,0,0,0,0,0,0,0,0,0,0,0,0…	D14578	-	-	-	-
252	lgm0521	mu	IDP4752	chr01	77.5	2.5	-	-	Genoplante Map	1,0,0,0,2,0,0,1,0,1,0,1,0,2,2,2,2,0,0,1,2,0,1,1,0,1,2,2,2,1,1,1,2,1,0,0,0,1,0,0,1,0,2,0,0,1,0,1,0,2,1,0,2,2,0,2,1,0,1,0,0,1,2,0,0,0,0,0,1,1,1,1,0,2,0,0,0,0,0,0,0,0,0,0,0,0,0,0,0,0,0,0,0,0,0,0,0,0,0,0,0,0,0,0,0,0,0,0,0,0,0,0,0,0,0,0,0,0,0,0,0,0,0,0,0,0,0,0,0,0,0,0,0,0,0,0,0,0,0,0,0,0,0,0,0,0,0,0,0,0,0,0,0,0,0,0,0,0,0,0,0,0,0,0,0,0,0,0,0,0,0,0,0,0,0,0,0,0,0,0,0,0,0,0,0,0,0,0,0,0,0,0,0,0,0,0,0,0,0,0…	-	-	-	-	-
253	MAGI_42126	mu	IDP4752	chr01	77.5	1.1	-	SNP	ISU SNP Map	1,1,0,2,2,2,2,1,0,1,1,1,1,2,2,2,2,0,0,1,2,2,1,1,2,1,2,2,2,1,1,1,1,1,0,0,1,1,0,0,1,2,2,1,2,1,1,1,1,2,1,2,2,1,1,2,1,0,0,1,2,1,2,0,1,2,1,0,0,1,1,1,2,2,2,2,0,1,1,1,2,0,2,1,2,2,1,1,2,1,2,2,1,1,2,1,1,1,1,1,1,1,0,1,1,2,1,1,2,0,1,1,1,0,1,1,1,1,0,2,1,1,2,2,0,0,1,1,1,2,2,1,0,1,0,1,2,2,2,0,1,2,1,1,0,2,1,2,1,2,2,0,1,2,1,1,1,0,0,0,2,2,0,2,2,1,2,1,2,0,0,0,2,0,1,1,2,0,2,2,2,2,2,1,0,1,2,2,0,2,2,1,1,1,1,2,1,1,2,2…	MAGIv3.1_42126	-	-	-	-
254	ufg78	mu	IDP4752	chr01	77.5	0.4	-	-	MMP	1,0,2,0,2,0,2,1,1,1,1,1,0,2,2,2,2,2,2,2,2,2,1,1,2,1,2,2,2,0,1,1,1,1,1,2,1,1,1,2,1,2,2,1,2,2,1,1,0,2,1,0,2,0,1,0,1,1,1,0,0,1,2,2,0,0,1,0,1,1,1,1,0,2,2,2,2,1,0,1,0,2,2,1,2,0,1,1,2,1,2,2,0,1,2,0,0,1,1,0,1,1,1,0,1,2,1,0,2,1,1,0,0,0,1,1,0,0,2,0,1,1,2,2,2,0,1,1,1,2,0,1,1,1,1,0,2,2,2,1,1,0,1,1,2,2,0,2,1,0,2,2,1,0,1,1,1,1,1,2,0,2,2,2,2,1,0,1,2,2,1,2,2,2,0,1,2,1,2,2,2,2,2,1,1,1,2,2,1,0,2,1,1,1,1,2,0,1,2,2…	BH417924	-	-	-	-
255	bnlg176	sk	-	chr01	78.6	0	-	-	Genoplante Map	0,0,0,0,2,0,2,1,0,1,0,1,0,2,2,2,2,0,0,0,2,2,1,1,0,1,2,2,2,1,1,1,1,1,0,0,1,1,0,0,1,0,2,1,0,0,1,1,0,2,1,0,2,1,0,2,1,0,1,0,0,1,2,0,0,0,0,0,1,1,1,1,0,2,0,0,0,0,0,0,0,0,0,0,0,0,0,0,0,0,0,0,0,0,0,0,0,0,0,0,0,0,0,0,0,0,0,0,0,0,0,0,0,0,0,0,0,0,0,0,0,0,0,0,0,0,0,0,0,0,0,0,0,0,0,0,0,0,0,0,0,0,0,0,0,0,0,0,0,0,0,0,0,0,0,0,0,0,0,0,0,0,0,0,0,0,0,0,0,0,0,0,0,0,0,0,0,0,0,0,0,0,0,0,0,0,0,0,0,0,0,0,0,0,0,0,0,0,0,0…	-	-	-	-	-
256	IDP7165	mu	bnlg176	chr01	78.6	1.1	Dominant	+/-	ISU Map7	1,1,2,2,2,2,2,1,0,1,1,1,1,2,2,2,2,0,0,1,2,2,1,1,2,1,2,2,2,1,1,1,1,1,0,0,1,1,0,2,1,2,2,1,1,1,1,1,1,2,1,2,2,1,1,2,1,0,0,1,2,1,2,0,1,2,1,2,0,1,1,1,2,2,2,1,0,1,1,1,2,0,2,1,2,2,1,1,2,1,2,2,1,1,2,1,1,1,1,1,1,1,0,1,1,2,1,1,1,0,1,1,1,1,1,1,1,1,0,2,1,1,2,2,0,0,1,1,1,2,2,1,0,1,0,1,2,2,2,0,1,1,1,1,2,2,1,2,1,2,2,0,1,2,1,2,1,0,2,2,1,2,0,1,2,1,2,1,2,0,0,0,2,0,1,1,2,0,2,2,2,2,2,1,1,1,2,2,0,2,2,1,1,1,1,2,1,1,2,2…	MAGIv3.1_27566	MAGIv3.1_27566	chr01	30397657	Consistent
257	IDP7904	mu	bnlg176	chr01	78.6	0.7	Dominant	+/-	ISU Map7	2,1,2,2,2,2,2,1,0,1,1,1,1,2,2,2,2,0,0,1,2,2,1,1,2,1,2,2,2,1,1,1,1,1,0,0,1,1,0,2,1,2,2,1,1,1,1,1,1,2,1,2,2,1,1,2,1,0,0,1,2,1,2,0,1,2,1,2,0,1,1,1,2,2,2,1,0,1,1,1,2,0,2,1,2,2,1,1,2,1,2,2,1,1,2,1,1,1,1,1,1,1,0,1,2,2,1,1,1,0,1,1,1,1,1,1,1,1,0,2,1,1,2,2,0,0,1,1,1,2,2,1,0,1,0,1,2,2,2,0,1,1,1,1,2,2,1,2,1,2,2,0,1,2,1,2,1,0,2,2,1,2,0,1,2,1,2,1,2,0,0,0,2,0,2,1,2,0,2,2,2,2,2,1,1,1,1,2,0,2,1,1,1,1,1,2,1,1,2,2…	MAGIv3.1_39531	MAGIv3.1_39531	chr01	30730436	Consistent
258	IDP7583	mu	bnlg176	chr01	78.6	2.1	Co-Dominant	Size	ISU Map7	1,1,0,0,2,2,2,1,0,1,1,1,1,2,2,2,2,0,0,1,2,2,1,1,2,1,2,2,2,1,1,1,1,1,0,0,1,1,0,2,1,2,2,1,1,1,1,1,1,2,1,2,2,1,1,2,1,0,0,1,2,1,2,0,1,2,1,2,0,1,1,1,2,2,2,1,0,1,1,1,2,0,2,1,2,2,1,1,0,1,2,2,1,1,2,1,1,1,1,1,1,1,0,1,2,2,1,1,1,0,1,2,1,1,1,2,1,1,0,2,1,1,2,2,0,0,1,1,1,2,2,1,0,1,0,1,2,2,2,0,1,1,1,1,2,2,1,2,1,2,2,0,1,2,0,2,1,0,0,0,1,2,0,1,2,1,2,1,2,0,0,0,2,0,2,1,2,0,2,2,2,2,2,1,1,1,2,2,0,2,1,1,1,1,1,2,1,1,2,2…	MAGIv3.1_59231	MAGIv3.1_59231	chr01	30864347	Consistent
259	gnp_QBK13c11	mu	bnlg176	chr01	78.6	0	-	-	Genoplante Map	1,0,0,0,2,0,2,1,0,1,0,1,0,2,2,2,2,0,0,1,2,2,1,1,0,1,2,2,2,1,1,1,1,1,0,0,1,0,0,0,0,0,2,1,0,0,0,1,0,2,1,0,0,1,0,2,1,0,0,0,0,1,2,0,0,0,0,0,1,1,0,1,0,0,0,0,0,0,0,0,0,0,0,0,0,0,0,0,0,0,0,0,0,0,0,0,0,0,0,0,0,0,0,0,0,0,0,0,0,0,0,0,0,0,0,0,0,0,0,0,0,0,0,0,0,0,0,0,0,0,0,0,0,0,0,0,0,0,0,0,0,0,0,0,0,0,0,0,0,0,0,0,0,0,0,0,0,0,0,0,0,0,0,0,0,0,0,0,0,0,0,0,0,0,0,0,0,0,0,0,0,0,0,0,0,0,0,0,0,0,0,0,0,0,0,0,0,0,0,0…	CF011839	CF011839	chr05	75234210	Inconsistent
260	IDP4430	mu	bnlg176	chr01	78.6	1.2	Dominant	+/-	ISU Map7	1,1,2,2,2,2,2,2,0,1,1,1,1,2,2,2,2,0,0,1,2,2,1,1,2,1,2,2,2,1,1,1,1,1,0,0,1,2,0,2,1,2,2,1,1,1,1,1,1,2,1,1,2,2,1,2,1,0,0,1,2,1,2,0,1,2,1,2,0,1,1,1,2,2,2,2,0,1,1,1,2,0,2,1,2,2,1,1,2,1,2,2,1,1,2,1,1,1,1,1,1,1,0,1,2,2,1,1,2,0,1,1,1,1,1,1,1,1,0,2,1,1,2,2,0,0,1,1,1,2,2,1,0,1,0,1,2,2,2,0,1,2,1,1,2,2,1,2,2,2,2,0,1,1,1,2,1,0,2,2,1,2,0,1,1,1,2,1,2,0,0,0,2,0,2,1,2,0,2,2,1,2,2,1,1,1,2,2,0,2,1,1,1,1,1,2,1,1,2,2…	MAGIv3.1_46380	MAGIv3.1_46380	chr01	32693800	Consistent
261	IDP7908	mu	bnlg176	chr01	78.6	0.7	Dominant	-/+	ISU Map7	1,1,0,2,2,2,2,2,0,1,1,1,1,2,2,2,2,0,0,1,2,2,1,1,2,1,2,2,2,1,1,1,1,1,0,0,1,1,0,2,1,2,2,1,1,1,1,1,1,2,1,1,2,1,1,2,1,0,0,1,2,1,2,0,1,2,1,2,0,2,1,1,2,2,2,2,0,1,1,1,2,0,2,1,2,2,1,1,2,1,2,2,1,1,2,1,1,1,1,1,1,1,0,1,2,2,1,1,2,0,1,1,1,1,1,1,1,1,0,2,1,1,2,2,0,0,1,1,1,2,2,1,0,1,0,1,2,2,2,0,1,2,1,1,2,2,1,2,2,2,2,0,1,1,1,2,1,0,0,0,1,2,0,1,1,1,2,1,2,0,0,0,2,0,2,1,2,0,2,2,1,2,2,1,1,1,2,2,0,2,1,1,1,1,2,2,1,1,2,2…	MAGIv3.1_85030	MAGIv3.1_85030	chr05	207526181	Inconsistent
262	MAGI_73926	mu	bnlg176	chr01	78.6	0.5	-	SNP	ISU SNP Map	1,1,0,2,2,2,2,1,0,1,1,1,1,2,2,2,2,0,0,1,2,2,1,1,2,1,2,2,2,1,1,1,1,1,0,0,1,1,0,0,1,2,2,1,1,1,1,1,1,2,1,1,2,1,1,2,1,0,0,1,2,1,2,0,1,2,1,0,0,1,1,1,2,2,2,2,0,1,1,1,2,0,2,1,2,2,1,1,2,1,2,2,1,1,2,1,1,1,1,1,1,1,0,1,2,2,1,1,2,0,1,1,1,1,1,1,1,1,0,2,1,1,2,2,0,0,1,1,1,2,2,1,0,1,0,1,2,2,2,0,1,2,1,1,0,2,1,2,2,2,2,0,1,1,1,2,1,0,0,0,1,2,0,1,0,1,2,1,2,0,0,0,2,0,2,1,2,0,2,2,1,2,2,1,1,1,2,2,0,2,1,1,1,1,1,2,1,1,2,2…	MAGIv3.1_73926	MAGIv3.1_73926	chr01	32581933	Consistent
263	MAGI_14992	mu	bnlg176	chr01	78.6	0.5	-	SNP	ISU SNP Map	1,1,0,2,2,2,2,1,0,1,1,1,1,2,2,2,2,0,0,1,2,2,1,1,2,1,2,2,2,1,1,1,1,0,0,0,1,1,0,0,1,2,2,1,1,1,1,1,1,2,1,2,2,1,1,2,1,0,0,1,2,1,2,0,1,2,1,0,0,1,1,1,2,2,2,2,0,1,1,2,2,0,2,1,2,2,1,1,2,1,2,2,1,1,2,1,1,1,1,1,1,1,0,1,2,2,1,1,2,0,1,1,1,1,1,1,1,1,0,2,1,1,2,2,0,0,1,1,1,2,2,1,0,1,0,1,2,2,2,0,1,2,1,1,0,2,1,2,2,2,2,0,1,2,1,2,1,0,0,0,1,2,0,1,2,1,2,1,2,0,0,0,2,0,2,1,2,0,2,2,2,2,2,1,1,1,2,2,0,2,1,1,1,1,1,2,1,1,2,2…	MAGIv3.1_14992	MAGIv3.1_14992	chr01	31792288	Consistent
264	cdo1387b	mu	bnlg176	chr01	78.6	1	-	-	MMP	1,0,2,0,2,0,2,1,2,1,0,1,1,2,2,2,2,2,2,0,2,2,1,1,2,1,2,2,2,1,1,0,0,1,1,2,1,1,1,0,1,2,2,1,1,1,1,1,0,2,1,2,2,1,1,2,1,1,1,0,0,1,2,2,0,0,0,0,1,1,1,1,0,2,2,2,2,1,0,2,2,2,2,1,0,2,1,1,2,1,2,2,0,1,2,0,0,1,1,0,0,1,1,0,1,2,2,0,2,1,0,1,0,1,1,1,1,1,2,2,1,1,2,2,2,0,1,1,1,2,0,1,1,0,0,0,0,2,0,1,1,0,1,1,2,0,0,2,2,0,2,2,1,0,1,2,1,1,1,2,0,2,2,0,2,0,0,1,2,2,1,2,0,2,0,1,2,1,2,2,2,2,2,1,1,1,0,2,1,0,0,0,1,1,1,2,0,1,2,2…	-	-	-	-	-
265	gnp_QCA13e01	mu	bnlg176	chr01	78.6	0	-	-	Genoplante Map	1,0,0,0,2,0,2,1,0,1,0,1,0,2,2,2,2,0,0,1,2,2,1,1,0,1,2,2,2,1,1,1,1,1,0,0,1,0,0,0,0,0,2,1,0,0,0,1,0,2,1,0,0,1,0,2,1,0,0,0,0,1,2,0,0,0,0,0,1,1,0,1,0,0,0,0,0,0,0,0,0,0,0,0,0,0,0,0,0,0,0,0,0,0,0,0,0,0,0,0,0,0,0,0,0,0,0,0,0,0,0,0,0,0,0,0,0,0,0,0,0,0,0,0,0,0,0,0,0,0,0,0,0,0,0,0,0,0,0,0,0,0,0,0,0,0,0,0,0,0,0,0,0,0,0,0,0,0,0,0,0,0,0,0,0,0,0,0,0,0,0,0,0,0,0,0,0,0,0,0,0,0,0,0,0,0,0,0,0,0,0,0,0,0,0,0,0,0,0,0…	CF025181	-	-	-	-
266	IDP2385	mu	bnlg176	chr01	78.6	0	Dominant	-/+	ISU Map7	1,0,0,0,2,0,2,1,0,1,0,1,0,2,2,2,2,0,0,1,2,2,1,1,0,1,2,2,2,1,1,1,1,1,0,0,1,1,0,0,1,0,2,1,0,1,1,1,0,2,1,0,2,1,0,2,1,0,1,0,0,1,2,0,0,0,0,0,1,1,1,1,0,2,0,0,0,0,0,0,0,0,0,0,0,0,0,0,0,0,0,0,0,0,0,0,0,0,0,0,0,0,0,0,0,0,0,0,0,0,0,0,0,0,0,0,0,0,0,0,0,0,0,0,0,0,0,0,0,0,0,0,0,0,0,0,0,0,0,0,0,0,0,0,0,0,0,0,0,0,0,0,0,0,0,0,0,0,0,0,0,0,0,0,0,0,0,0,0,0,0,0,0,0,0,0,0,0,0,0,0,0,0,0,0,0,0,0,0,0,0,0,0,0,0,0,0,0,0,0…	BM335300	BM335300	chr01	30862653	Consistent
267	gnp_QCT2e01b	mu	bnlg176	chr01	78.6	0	-	-	Genoplante Map	1,0,0,0,2,0,2,1,0,1,0,1,0,2,0,0,0,0,0,1,2,2,1,1,0,1,2,2,2,1,1,1,0,1,0,0,1,0,0,0,0,0,2,1,0,0,1,1,0,2,1,0,0,0,0,2,1,0,0,0,0,1,2,0,0,0,0,0,1,1,0,1,0,0,0,0,0,0,0,0,0,0,0,0,0,0,0,0,0,0,0,0,0,0,0,0,0,0,0,0,0,0,0,0,0,0,0,0,0,0,0,0,0,0,0,0,0,0,0,0,0,0,0,0,0,0,0,0,0,0,0,0,0,0,0,0,0,0,0,0,0,0,0,0,0,0,0,0,0,0,0,0,0,0,0,0,0,0,0,0,0,0,0,0,0,0,0,0,0,0,0,0,0,0,0,0,0,0,0,0,0,0,0,0,0,0,0,0,0,0,0,0,0,0,0,0,0,0,0,0…	CF061889	-	-	-	-
268	TIDP3265	mu	bnlg176	chr01	78.6	0	Co-Dominant	TGCE	ISU Map7	1,0,0,0,2,0,2,1,0,1,0,1,0,2,2,2,2,0,0,1,2,2,1,1,0,1,2,2,2,1,1,1,1,1,0,0,1,1,0,0,1,0,2,1,0,1,1,1,0,2,1,0,2,1,0,2,1,0,1,0,0,1,2,0,0,0,0,0,1,1,1,1,0,2,0,0,0,0,0,0,0,0,0,0,0,0,0,0,0,0,0,0,0,0,0,0,0,0,0,0,0,0,0,0,0,0,0,0,0,0,0,0,0,0,0,0,0,0,0,0,0,0,0,0,0,0,0,0,0,0,0,0,0,0,0,0,0,0,0,0,0,0,0,0,0,0,0,0,0,0,0,0,0,0,0,0,0,0,0,0,0,0,0,0,0,0,0,0,0,0,0,0,0,0,0,0,0,0,0,0,0,0,0,0,0,0,0,0,0,0,0,0,0,0,0,0,0,0,0,0…	BM073953	BM073953	chr01	30863685	Consistent
269	IDP4825	mu	bnlg176	chr01	78.6	0.7	Dominant	+/-	ISU Map7	1,1,2,2,2,2,2,1,0,1,1,1,1,2,2,2,2,0,0,1,2,2,1,1,2,1,2,2,2,1,1,1,1,1,0,0,1,1,0,2,1,2,2,1,1,1,1,1,1,2,1,2,2,1,1,2,1,0,0,1,2,1,2,0,1,1,1,2,0,1,1,1,2,2,2,2,0,1,1,2,2,0,2,1,2,2,1,1,2,1,2,2,1,1,2,1,1,1,2,1,2,1,0,2,2,2,1,1,2,0,1,1,1,1,1,1,1,1,0,2,1,1,2,2,0,0,1,1,1,2,2,1,0,1,0,1,2,2,2,0,1,2,1,1,2,2,1,2,1,2,2,0,1,2,1,2,1,0,0,0,1,2,0,1,2,1,2,1,2,0,0,0,2,0,1,1,2,0,2,2,2,2,2,2,1,1,2,2,0,2,2,2,2,1,2,2,2,1,2,2…	MAGIv3.1_27352	MAGIv3.1_27352	chr01	30544603	Consistent
270	IDP1641	mu	bnlg176	chr01	78.6	1.1	Dominant	+/-	ISU Map7	1,0,0,0,2,0,2,1,0,1,0,1,0,2,2,2,2,0,0,1,2,2,1,1,0,1,2,2,2,1,1,1,1,1,0,0,1,1,0,0,1,0,0,2,0,1,1,1,0,2,1,0,2,1,0,2,1,0,1,0,0,1,2,0,0,0,0,0,1,1,1,1,0,2,0,0,0,0,0,0,0,0,0,0,0,0,0,0,0,0,0,0,0,0,0,0,0,0,0,0,0,0,0,0,0,0,0,0,0,0,0,0,0,0,0,0,0,0,0,0,0,0,0,0,0,0,0,0,0,0,0,0,0,0,0,0,0,0,0,0,0,0,0,0,0,0,0,0,0,0,0,0,0,0,0,0,0,0,0,0,0,0,0,0,0,0,0,0,0,0,0,0,0,0,0,0,0,0,0,0,0,0,0,0,0,0,0,0,0,0,0,0,0,0,0,0,0,0,0,0…	MEC_34912_P95-Mar06	MEC_34912_P95-Mar06	chr01	269778816	Inconsistent
271	IDP2362	mu	bnlg176	chr01	78.6	1.4	Dominant	+/-	ISU Map7	1,1,2,2,2,2,2,1,0,1,1,1,1,2,2,2,2,0,0,1,2,2,1,1,2,2,2,2,2,1,1,1,1,1,0,0,1,1,0,2,1,2,2,1,1,1,1,1,1,2,1,2,2,1,1,2,1,0,0,1,2,1,2,0,1,2,1,2,0,1,1,1,2,2,2,2,0,1,1,2,2,0,2,1,2,2,1,1,2,1,2,2,1,1,2,1,1,1,1,1,1,1,0,1,1,2,1,1,2,0,1,1,1,1,1,1,1,1,0,2,1,1,2,2,0,0,1,1,1,2,2,1,0,1,0,1,1,2,1,0,1,1,1,2,2,1,1,2,1,2,2,0,2,2,1,2,2,0,2,2,1,2,0,2,2,2,2,2,2,0,0,0,1,0,1,2,2,0,2,2,2,2,1,1,1,1,1,2,0,2,2,1,1,1,1,2,1,1,2,2…	MAGIv3.1_27566	MAGIv3.1_27566	chr01	30397657	Consistent
272	IDP1614	mu	bnlg176	chr01	78.6	1	Dominant	+/-	ISU Map7	1,0,0,0,2,0,2,1,0,1,0,1,0,2,2,2,2,0,0,1,2,2,1,1,0,1,2,2,2,1,1,1,1,1,0,0,1,1,0,0,1,0,2,2,0,1,2,1,0,2,1,0,2,1,0,2,1,0,1,0,0,1,2,0,0,0,0,0,1,1,1,1,0,2,0,0,0,0,0,0,0,0,0,0,0,0,0,0,0,0,0,0,0,0,0,0,0,0,0,0,0,0,0,0,0,0,0,0,0,0,0,0,0,0,0,0,0,0,0,0,0,0,0,0,0,0,0,0,0,0,0,0,0,0,0,0,0,0,0,0,0,0,0,0,0,0,0,0,0,0,0,0,0,0,0,0,0,0,0,0,0,0,0,0,0,0,0,0,0,0,0,0,0,0,0,0,0,0,0,0,0,0,0,0,0,0,0,0,0,0,0,0,0,0,0,0,0,0,0,0…	MEC_34915_P95-Mar06	-	-	-	-
273	TIDP2938	sk	-	chr01	80.1	0	Co-Dominant	TGCE	ISU Map7	1,0,0,0,2,0,2,1,0,0,0,1,0,2,2,2,2,0,0,1,2,2,1,1,0,1,2,2,2,1,1,1,1,1,0,0,1,1,0,0,1,0,2,1,0,1,1,1,0,2,1,0,2,1,0,2,1,0,1,0,0,1,2,0,0,0,0,0,1,1,1,1,0,2,0,0,0,0,0,0,0,0,0,0,0,0,0,0,0,0,0,0,0,0,0,0,0,0,0,0,0,0,0,0,0,0,0,0,0,0,0,0,0,0,0,0,0,0,0,0,0,0,0,0,0,0,0,0,0,0,0,0,0,0,0,0,0,0,0,0,0,0,0,0,0,0,0,0,0,0,0,0,0,0,0,0,0,0,0,0,0,0,0,0,0,0,0,0,0,0,0,0,0,0,0,0,0,0,0,0,0,0,0,0,0,0,0,0,0,0,0,0,0,0,0,0,0,0,0,0…	MAGIv3.1_73926	MAGIv3.1_73926	chr01	32581933	Consistent
274	lim122	sk	-	chr01	80.1	0	-	-	MMP	1,0,2,0,2,0,2,1,2,1,1,1,1,2,2,2,2,2,2,1,2,2,1,1,2,1,2,2,2,1,1,1,1,1,1,1,1,1,1,2,1,2,2,1,1,1,1,1,0,2,1,1,2,1,1,2,1,1,1,0,0,1,2,2,0,0,1,0,1,1,1,1,0,2,2,2,2,1,0,1,2,2,2,1,2,2,1,1,2,1,2,2,0,1,2,0,0,1,1,0,1,1,1,2,2,2,1,0,2,1,1,1,0,1,1,1,1,1,2,2,1,1,2,2,2,2,0,2,1,0,0,1,1,1,1,0,2,2,2,1,1,0,1,1,1,2,0,2,2,0,2,2,2,0,1,2,1,1,1,2,0,2,2,1,2,1,0,1,2,2,1,2,2,1,2,1,2,1,2,2,1,2,2,1,1,1,1,2,1,0,2,1,1,1,1,2,0,1,2,2…	CC787970,AC155390,CC785750,CC785751,CC787971	-	-	-	-
275	IDP4140	mu	lim122	chr01	80.1	5.3	Dominant	+/-	ISU Map7	1,0,0,0,2,0,2,1,0,1,0,1,0,2,2,2,2,0,0,1,2,2,1,1,0,1,2,2,2,1,1,1,2,1,0,0,1,1,0,0,1,0,2,1,0,1,1,1,0,2,1,0,2,1,0,2,2,0,2,0,0,1,2,0,0,0,0,0,1,2,1,2,0,2,0,0,0,0,0,0,0,0,0,0,0,0,0,0,0,0,0,0,0,0,0,0,0,0,0,0,0,0,0,0,0,0,0,0,0,0,0,0,0,0,0,0,0,0,0,0,0,0,0,0,0,0,0,0,0,0,0,0,0,0,0,0,0,0,0,0,0,0,0,0,0,0,0,0,0,0,0,0,0,0,0,0,0,0,0,0,0,0,0,0,0,0,0,0,0,0,0,0,0,0,0,0,0,0,0,0,0,0,0,0,0,0,0,0,0,0,0,0,0,0,0,0,0,0,0,0…	MAGIv3.1_44246	MAGIv3.1_44246	chr01	32044302	Consistent
276	umc1073	sk	-	chr01	81.9	0	-	-	MMP	1,0,2,0,2,0,2,1,2,1,1,0,0,2,2,2,2,2,2,1,2,2,0,1,2,1,2,2,2,1,1,1,1,1,1,1,1,1,1,2,1,2,2,1,1,1,1,1,0,2,1,1,1,1,1,2,1,1,1,0,0,1,1,2,0,0,1,0,1,1,1,1,0,2,2,2,2,1,0,1,2,2,2,1,2,2,1,1,2,1,2,1,0,1,2,0,0,2,1,0,1,1,1,0,2,2,1,0,0,1,1,1,0,1,1,1,1,1,0,2,1,1,1,2,2,2,1,2,1,2,0,1,1,1,1,0,2,2,2,1,1,0,1,1,1,0,0,2,2,0,2,2,1,0,1,2,1,1,1,1,0,2,2,1,2,1,0,1,2,2,1,2,2,2,0,1,2,1,2,2,1,2,2,1,1,1,1,2,1,0,2,1,1,1,1,2,0,1,2,2…	AI396479	AI396479	chr01	32940897	Consistent
277	umc1403	sk	-	chr01	83	0	-	-	MMP	1,0,2,0,2,0,2,1,2,1,1,1,1,2,2,2,2,2,2,1,0,2,1,1,2,1,2,2,2,1,1,1,1,1,1,1,1,1,1,2,1,2,2,1,1,1,1,1,0,2,1,1,1,1,1,2,1,1,1,0,0,1,1,2,0,0,1,0,1,1,1,1,0,2,2,2,2,1,0,1,2,2,2,1,1,2,1,1,2,1,2,1,0,1,2,0,0,1,1,0,1,1,1,2,2,2,1,0,2,1,1,1,0,1,1,1,1,1,2,2,1,1,1,2,1,2,1,2,1,2,0,1,1,1,1,0,2,2,2,1,1,0,1,1,1,1,0,2,2,0,2,2,1,0,1,2,1,1,1,1,0,2,2,1,2,1,0,1,2,2,1,2,2,2,1,1,2,1,1,2,1,2,2,1,1,1,1,2,1,0,2,1,1,1,1,2,0,1,2,2…	CC830145,CC823775,AY105374,CC830144,AI770920	-	-	-	-
278	IDP1410	mu	umc1403	chr01	83	1.1	Dominant	-/+	ISU Map7	1,1,1,2,1,2,2,2,0,1,1,1,1,2,2,2,2,0,0,1,2,2,1,1,2,1,2,2,2,1,1,1,1,1,0,0,1,1,0,2,1,2,2,1,1,1,1,1,1,2,1,1,1,1,1,1,1,0,0,1,2,1,1,0,1,2,1,2,0,1,1,1,2,2,2,2,0,1,1,1,2,0,2,1,1,2,1,1,2,1,2,1,1,1,2,1,1,1,1,1,1,1,0,1,2,2,1,1,2,0,1,1,1,1,1,1,1,1,0,2,1,1,1,2,0,0,1,1,1,2,2,1,0,1,0,1,2,2,2,0,1,2,1,1,1,1,1,2,2,1,2,0,1,1,1,2,1,0,0,0,1,2,0,1,1,1,2,1,2,0,0,0,2,0,1,1,2,0,1,2,1,2,2,1,1,1,2,2,0,2,1,1,1,1,1,2,1,1,1,2…	MEC_30268_P95-Mar06	-	-	-	-
279	MAGI_39284	sk	-	chr01	84.6	0	-	SNP	ISU SNP Map	1,1,0,2,2,2,2,1,0,1,1,1,1,2,2,2,2,0,0,1,2,2,1,1,2,1,2,2,2,1,1,1,1,1,0,0,1,1,0,0,1,2,2,1,1,1,1,1,1,2,1,1,1,1,1,2,1,0,0,1,2,1,1,0,1,2,1,0,0,1,1,1,2,2,2,2,0,1,1,2,2,0,2,1,1,2,1,1,2,1,2,1,1,1,2,1,1,1,1,1,1,1,0,1,2,2,1,1,2,0,1,1,1,1,1,1,1,1,0,2,1,1,1,2,0,0,1,1,1,1,2,1,0,1,0,1,2,2,2,0,1,2,1,1,0,1,1,2,2,1,2,0,1,1,1,2,1,0,0,0,1,2,0,1,1,1,2,1,2,0,0,0,2,0,1,1,2,0,1,2,1,2,2,1,1,1,2,2,0,2,1,1,1,1,1,2,1,1,2,2…	MAGIv3.1_39284	-	-	-	-
280	MAGI_93315	sk	-	chr01	87.4	0	-	SNP	ISU SNP Map	1,1,0,2,2,2,2,1,0,1,0,1,1,2,2,2,2,0,0,1,1,2,1,1,2,1,2,2,2,2,2,2,1,1,0,0,1,1,0,0,1,2,2,1,1,1,1,1,1,2,1,2,1,1,1,1,1,0,0,1,2,1,1,0,1,2,0,0,0,1,2,1,2,2,2,2,0,1,2,1,2,0,2,1,1,2,1,2,0,1,2,1,1,0,2,1,1,1,1,1,1,1,0,1,2,2,1,1,2,0,1,1,1,1,1,1,2,1,0,2,0,1,1,2,0,0,1,1,1,2,2,1,0,1,0,1,2,2,2,0,2,2,1,2,0,1,1,2,2,0,2,0,1,1,1,1,1,0,0,0,0,2,0,1,1,1,2,2,2,0,0,0,2,0,1,1,2,0,1,2,1,2,2,0,1,1,2,2,0,2,1,1,1,1,1,2,1,1,2,2…	MAGIv3.1_93315	MAGIv3.1_93315	chr01	34724433	Consistent
281	IDP4348	mu	MAGI_93315	chr01	87.4	0.7	Co-Dominant	Size	ISU Map7	1,1,0,2,2,2,2,0,0,1,1,1,1,2,2,2,2,0,0,1,1,2,1,1,2,1,2,2,2,2,2,2,1,1,0,0,1,1,0,2,1,2,2,1,1,1,1,1,1,2,1,2,1,1,1,1,1,0,0,1,2,1,1,0,1,2,1,2,0,1,2,1,2,2,2,2,0,1,2,2,2,0,2,1,1,2,1,2,2,1,2,1,1,1,2,1,1,1,1,1,1,1,0,1,2,2,1,1,2,0,1,1,1,1,1,1,2,1,0,2,1,1,1,2,0,0,1,1,1,2,2,1,0,1,0,1,2,2,2,0,2,2,1,2,1,1,1,2,2,1,2,0,1,1,1,1,1,0,0,0,1,2,0,1,1,1,2,2,2,0,0,0,2,0,0,1,2,0,1,2,1,2,2,1,1,1,2,2,0,2,1,1,1,1,1,2,1,1,2,2…	MAGIv3.1_71363	MAGIv3.1_71363	chr01	33958856	Consistent
282	IDP6029	mu	MAGI_93315	chr01	87.4	6.3	Dominant	+/-	ISU Map7	1,0,0,0,2,0,2,1,0,1,0,1,0,2,2,2,2,0,0,1,1,2,1,1,0,1,2,2,2,2,2,2,1,1,0,0,1,1,0,0,1,0,2,1,0,1,1,1,0,2,1,0,1,1,0,1,1,0,1,0,0,1,1,0,0,0,0,0,1,1,2,1,0,2,0,0,0,0,0,0,0,0,0,0,0,0,0,0,0,0,0,0,0,0,0,0,0,0,0,0,0,0,0,0,0,0,0,0,0,0,0,0,0,0,0,0,0,0,0,0,0,0,0,0,0,0,0,0,0,0,0,0,0,0,0,0,0,0,0,0,0,0,0,0,0,0,0,0,0,0,0,0,0,0,0,0,0,0,0,0,0,0,0,0,0,0,0,0,0,0,0,0,0,0,0,0,0,0,0,0,0,0,0,0,0,0,0,0,0,0,0,0,0,0,0,0,0,0,0,0…	MAGIv3.1_106538	MAGIv3.1_106538	chr01	34716592	Consistent
283	IDPM180	mu	MAGI_93315	chr01	87.4	6.1	0	0	ISU Map7	1,0,0,0,2,0,2,1,0,1,0,1,0,1,2,1,2,0,0,1,1,2,1,1,0,1,2,2,1,2,1,0,1,1,0,0,1,1,0,0,1,0,2,1,0,1,1,1,0,2,2,0,1,1,0,1,1,0,1,0,0,2,2,0,0,0,0,0,1,1,2,1,0,0,0,0,0,0,0,0,0,0,0,0,0,0,0,0,0,0,0,0,0,0,0,0,0,0,0,0,0,0,0,0,0,0,0,0,0,0,0,0,0,0,0,0,0,0,0,0,0,0,0,0,0,0,0,0,0,0,0,0,0,0,0,0,0,0,0,0,0,0,0,0,0,0,0,0,0,0,0,0,0,0,0,0,0,0,0,0,0,0,0,0,0,0,0,0,0,0,0,0,0,0,0,0,0,0,0,0,0,0,0,0,0,0,0,0,0,0,0,0,0,0,0,0,0,0,0,0…	MAGIv3.1_18012	-	-	-	-
284	npi439a	sk	-	chr01	88.1	0	-	-	MMP	1,0,2,0,0,0,2,1,1,1,0,0,1,2,2,2,2,1,2,0,1,2,1,1,2,1,2,2,2,2,2,2,1,1,2,1,1,1,1,0,1,2,2,1,1,1,1,1,0,2,0,2,1,1,1,1,1,1,1,0,0,1,1,2,0,0,0,0,1,1,2,1,0,0,2,2,2,1,0,1,2,2,2,1,0,2,1,2,2,1,2,1,0,1,2,0,0,1,1,0,1,1,1,0,2,2,1,0,0,0,0,1,0,0,1,1,2,1,0,0,1,1,1,2,0,0,1,2,1,2,0,1,1,0,0,0,0,2,0,1,2,0,1,2,1,1,0,2,0,0,2,2,1,0,1,1,1,1,1,1,0,2,2,1,2,0,0,2,2,2,1,2,2,2,0,1,2,1,1,0,1,2,2,1,1,1,0,2,1,0,0,0,1,1,1,2,0,1,2,2…	-	-	-	-	-
285	umc11a	sk	-	chr01	88.8	0	-	-	MMP	1,0,2,0,0,0,2,1,1,1,0,0,1,2,2,2,2,1,2,0,1,2,1,1,2,1,2,2,2,2,2,0,1,1,1,1,1,2,1,0,1,2,2,1,1,1,1,1,0,2,0,2,1,1,1,1,1,1,1,0,0,1,2,2,0,0,0,0,1,1,2,1,0,0,2,2,2,1,0,1,2,2,2,1,0,2,1,2,2,1,2,1,0,1,2,0,0,1,1,0,1,1,1,0,2,2,1,0,0,0,0,1,0,0,1,1,2,1,0,0,1,1,1,2,0,0,1,2,1,2,0,1,1,0,0,0,0,2,0,1,2,0,1,2,1,1,0,2,0,0,2,2,1,0,1,1,1,1,1,1,0,2,2,1,2,0,0,2,2,2,2,2,2,2,0,1,2,1,1,0,1,2,2,1,1,1,0,2,1,0,0,0,1,1,1,2,0,1,2,2…	-	-	-	-	-
286	umc230	mu	umc11a	chr01	88.8	0.4	-	-	MMP	1,0,2,0,0,0,0,1,1,1,1,1,1,2,2,2,2,1,2,1,1,2,1,1,2,1,2,2,2,2,2,0,1,1,1,1,1,2,1,2,1,2,2,1,1,1,1,1,0,2,1,2,1,1,1,0,1,1,1,0,0,1,2,2,0,0,1,0,1,1,2,1,0,2,2,2,2,1,0,0,2,0,2,1,1,2,1,2,2,1,2,1,0,1,2,0,0,1,1,0,1,0,1,1,2,2,0,0,2,1,0,1,0,1,1,1,2,1,2,2,1,1,1,2,1,1,1,2,1,2,0,1,1,1,1,0,0,2,2,1,2,0,1,2,1,1,0,2,1,0,2,2,1,0,1,1,1,1,1,1,0,2,2,1,2,0,0,2,2,2,2,2,2,2,1,1,2,1,1,2,1,2,2,1,1,1,1,2,1,0,2,1,1,1,1,2,0,1,2,2…	-	-	-	-	-
287	npi234a	mu	umc11a	chr01	88.8	1.9	-	-	MMP	0,0,0,0,0,0,0,0,0,0,0,0,0,0,0,0,0,0,0,0,1,2,1,1,2,1,2,2,2,2,2,0,1,1,1,1,1,2,1,2,1,2,2,1,1,1,1,1,0,2,0,2,1,1,1,1,1,1,1,0,0,1,2,2,0,0,1,0,1,1,2,1,0,0,2,2,2,1,0,0,2,2,2,1,1,2,1,2,2,1,2,1,0,1,2,0,0,1,1,0,0,1,1,0,0,2,2,0,0,0,0,1,0,0,1,1,2,1,0,0,1,1,1,2,0,0,1,2,1,2,0,1,1,1,1,0,2,2,2,1,2,0,2,0,1,1,0,2,0,0,2,2,1,0,1,1,1,1,1,1,0,2,2,1,2,1,0,2,2,2,2,2,2,2,1,1,2,1,1,2,1,2,2,1,1,1,1,2,1,0,1,1,1,1,1,2,0,1,2,2…	-	-	-	-	-
288	gnp_QAN17c10a	mu	umc11a	chr01	88.8	1.6	-	-	Genoplante Map	1,0,0,0,2,0,2,1,0,1,0,1,0,2,2,2,2,0,0,0,0,1,1,1,0,1,0,2,2,2,2,2,1,1,0,0,1,0,0,0,0,0,2,1,0,0,0,2,0,2,1,0,0,1,0,1,0,0,0,0,0,0,0,0,0,0,0,0,0,0,0,1,0,0,0,0,0,0,0,0,0,0,0,0,0,0,0,0,0,0,0,0,0,0,0,0,0,0,0,0,0,0,0,0,0,0,0,0,0,0,0,0,0,0,0,0,0,0,0,0,0,0,0,0,0,0,0,0,0,0,0,0,0,0,0,0,0,0,0,0,0,0,0,0,0,0,0,0,0,0,0,0,0,0,0,0,0,0,0,0,0,0,0,0,0,0,0,0,0,0,0,0,0,0,0,0,0,0,0,0,0,0,0,0,0,0,0,0,0,0,0,0,0,0,0,0,0,0,0,0…	CX129480	CX129480	chr07	7234126	Inconsistent
289	lgm1076	mu	umc11a	chr01	88.8	0	-	-	Genoplante Map	1,0,0,0,2,0,2,1,0,1,0,1,0,2,2,2,2,0,0,1,1,1,1,1,0,1,1,2,2,0,2,2,1,1,0,0,1,2,0,0,1,0,2,1,0,1,1,2,0,2,1,0,1,1,0,1,1,0,1,0,0,1,2,0,0,0,0,0,1,1,2,1,0,2,0,0,0,0,0,0,0,0,0,0,0,0,0,0,0,0,0,0,0,0,0,0,0,0,0,0,0,0,0,0,0,0,0,0,0,0,0,0,0,0,0,0,0,0,0,0,0,0,0,0,0,0,0,0,0,0,0,0,0,0,0,0,0,0,0,0,0,0,0,0,0,0,0,0,0,0,0,0,0,0,0,0,0,0,0,0,0,0,0,0,0,0,0,0,0,0,0,0,0,0,0,0,0,0,0,0,0,0,0,0,0,0,0,0,0,0,0,0,0,0,0,0,0,0,0,0…	-	-	-	-	-
290	bnlg1484	sk	-	chr01	89.1	0	-	-	MMP	1,0,2,0,2,0,2,1,1,1,0,1,1,2,2,2,2,1,2,0,1,2,1,1,2,1,2,2,2,2,2,0,0,0,1,1,1,2,1,0,1,2,2,1,1,1,1,1,0,2,1,2,1,1,1,0,1,1,1,0,0,1,2,0,0,0,0,0,1,1,2,1,0,0,2,2,2,1,0,0,2,2,2,0,0,2,1,2,0,1,2,1,0,0,0,0,0,1,1,0,0,1,0,1,2,2,1,0,2,1,0,0,0,1,1,1,2,1,2,2,1,1,1,2,0,0,1,2,1,2,0,1,1,0,0,0,0,2,0,1,2,0,1,2,1,1,0,2,0,0,2,2,1,0,1,1,1,1,1,1,0,2,2,1,0,0,0,2,2,0,2,2,2,2,0,1,2,1,1,2,1,2,2,1,1,1,0,2,1,0,0,0,1,1,1,2,0,1,2,2…	CC149237,CC830149,CC830148,CC149238,AC155404	-	-	-	-
291	TIDP3455	mu	bnlg1484	chr01	89.1	1.4	Co-Dominant	TGCE	ISU Map7	1,0,0,0,2,0,2,1,0,1,0,1,0,2,2,2,2,0,0,1,1,1,1,1,0,1,0,2,2,2,2,2,1,1,0,0,1,2,0,0,1,0,2,1,0,1,1,2,0,2,1,0,1,1,0,1,1,0,1,0,0,0,1,0,0,0,0,0,1,1,1,1,0,2,0,0,0,0,0,0,0,0,0,0,0,0,0,0,0,0,0,0,0,0,0,0,0,0,0,0,0,0,0,0,0,0,0,0,0,0,0,0,0,0,0,0,0,0,0,0,0,0,0,0,0,0,0,0,0,0,0,0,0,0,0,0,0,0,0,0,0,0,0,0,0,0,0,0,0,0,0,0,0,0,0,0,0,0,0,0,0,0,0,0,0,0,0,0,0,0,0,0,0,0,0,0,0,0,0,0,0,0,0,0,0,0,0,0,0,0,0,0,0,0,0,0,0,0,0,0…	BG841466	BG841466	chr01	37039087	Consistent
292	IDP6057	mu	bnlg1484	chr01	89.1	1.4	Dominant	+/-	ISU Map7	1,0,0,0,2,0,2,1,0,1,0,1,0,2,2,2,2,0,0,1,1,1,1,1,0,1,1,2,2,2,2,2,1,1,0,0,1,2,0,0,1,0,2,1,0,2,1,2,0,2,1,0,1,1,0,1,1,0,1,0,0,1,1,0,0,0,0,0,1,1,2,1,0,2,0,0,0,0,0,0,0,0,0,0,0,0,0,0,0,0,0,0,0,0,0,0,0,0,0,0,0,0,0,0,0,0,0,0,0,0,0,0,0,0,0,0,0,0,0,0,0,0,0,0,0,0,0,0,0,0,0,0,0,0,0,0,0,0,0,0,0,0,0,0,0,0,0,0,0,0,0,0,0,0,0,0,0,0,0,0,0,0,0,0,0,0,0,0,0,0,0,0,0,0,0,0,0,0,0,0,0,0,0,0,0,0,0,0,0,0,0,0,0,0,0,0,0,0,0,0…	MAGIv3.1_36045	MAGIv3.1_36045	chr01	36866559	Consistent
293	TIDP6252	mu	bnlg1484	chr01	89.1	0.7	Co-Dominant	TGCE	ISU Map7	0,0,0,0,2,0,2,1,0,1,0,1,0,2,2,0,2,0,0,1,1,1,1,1,0,1,1,2,2,2,0,2,1,1,0,0,1,2,0,0,1,0,2,1,0,1,1,2,0,2,1,0,1,1,0,1,1,0,1,0,0,1,2,0,0,0,0,0,1,1,2,1,0,2,0,0,0,0,0,0,0,0,0,0,0,0,0,0,0,0,0,0,0,0,0,0,0,0,0,0,0,0,0,0,0,0,0,0,0,0,0,0,0,0,0,0,0,0,0,0,0,0,0,0,0,0,0,0,0,0,0,0,0,0,0,0,0,0,0,0,0,0,0,0,0,0,0,0,0,0,0,0,0,0,0,0,0,0,0,0,0,0,0,0,0,0,0,0,0,0,0,0,0,0,0,0,0,0,0,0,0,0,0,0,0,0,0,0,0,0,0,0,0,0,0,0,0,0,0,0…	MAGIv3.1_21355	MAGIv3.1_21355	chr01	35778777	Consistent
294	IDP8137	sk	-	chr01	89.5	0	Dominant	-/+	ISU Map7	1,0,0,0,2,0,2,1,0,1,0,1,0,2,2,2,2,0,0,1,1,1,1,1,0,1,2,2,2,2,2,2,1,1,0,0,1,2,0,0,1,0,2,1,0,1,1,1,0,2,1,0,1,1,0,1,1,0,1,0,0,1,2,0,0,0,0,0,1,1,2,1,0,2,0,0,0,0,0,0,0,0,0,0,0,0,0,0,0,0,0,0,0,0,0,0,0,0,0,0,0,0,0,0,0,0,0,0,0,0,0,0,0,0,0,0,0,0,0,0,0,0,0,0,0,0,0,0,0,0,0,0,0,0,0,0,0,0,0,0,0,0,0,0,0,0,0,0,0,0,0,0,0,0,0,0,0,0,0,0,0,0,0,0,0,0,0,0,0,0,0,0,0,0,0,0,0,0,0,0,0,0,0,0,0,0,0,0,0,0,0,0,0,0,0,0,0,0,0,0…	MAGIv4.0_77219	-	-	-	-
295	IDP3878	mu	IDP8137	chr01	89.5	4.8	Co-Dominant	Size	ISU Map7	1,1,0,2,2,2,2,1,0,1,1,1,1,2,1,2,2,0,0,1,1,1,2,1,2,1,1,2,2,2,2,2,1,1,0,0,1,2,0,1,1,2,2,1,1,1,1,1,1,2,1,2,1,1,1,1,1,0,0,2,2,1,1,0,1,2,1,1,0,1,2,1,1,2,1,2,0,1,0,1,1,0,2,2,1,2,1,2,1,1,2,1,1,1,2,1,1,1,1,1,1,1,0,1,2,2,1,1,2,0,2,1,1,2,1,1,2,1,0,2,1,1,1,2,0,0,1,1,2,2,2,1,0,1,0,1,1,2,2,0,2,2,1,2,1,1,1,2,0,1,2,0,1,1,1,1,1,0,0,0,1,2,0,1,1,1,1,2,1,0,0,0,2,0,2,1,1,0,2,2,1,2,0,1,2,2,2,2,0,2,2,1,2,1,1,1,1,2,1,1…	MAGIv3.1_99679	MAGIv3.1_99679	chr01	38675927	Consistent
296	AY109929	mu	IDP8137	chr01	89.5	1.4	-	-	MMP	1,0,2,0,2,0,2,1,1,1,2,1,1,2,1,2,2,1,1,1,1,1,2,1,2,1,1,2,2,2,2,0,1,1,1,1,1,2,1,2,1,2,2,1,1,1,1,0,0,2,1,2,1,1,1,1,1,1,1,0,0,1,1,0,0,0,1,0,1,1,2,1,0,2,1,2,2,1,0,2,1,2,2,2,0,2,1,2,1,1,2,1,0,1,2,0,0,1,1,0,1,1,1,1,2,2,1,0,2,1,0,1,0,2,0,1,2,0,2,2,1,1,1,0,0,0,1,2,1,2,0,1,1,0,0,0,0,2,2,1,2,0,1,2,1,1,0,2,1,0,2,2,1,0,1,1,1,1,0,1,0,1,2,1,2,0,0,2,1,1,2,1,1,2,1,1,2,1,1,2,1,2,2,1,1,1,1,1,1,0,2,1,0,0,1,1,0,1,0,2…	AW927593,AY109929,BE129699,BE056042,BE519040,AW600360,BE518808,AW927453,BV152969,BV152970,AW562562,BV152973,BV152968,AW862700,BV152971,BV152966,BV152972,BV152965,BE025530,BV152974,BE025529,BV152967,AW927454	BV152965	chr01	38607867	Consistent
297	mmp66	mu	IDP8137	chr01	89.5	2.6	-	-	MMP	1,0,2,0,2,0,2,1,1,1,1,1,0,2,1,2,2,1,2,1,1,1,2,1,2,1,1,2,2,0,2,0,1,1,1,1,1,2,0,2,1,2,2,1,1,1,1,1,0,2,1,0,0,1,1,1,1,1,1,0,0,1,1,2,0,0,1,0,1,1,2,1,0,2,1,2,2,1,0,0,0,2,2,2,1,0,1,2,1,1,2,1,0,1,2,0,0,1,1,0,1,1,1,0,2,2,1,0,2,1,1,0,0,1,1,1,0,0,2,0,1,1,0,0,1,0,1,2,1,2,0,1,1,1,1,0,1,2,2,1,2,0,1,2,1,1,0,2,1,0,2,2,1,0,1,1,1,1,1,1,0,2,2,1,2,1,0,2,1,1,2,1,1,2,1,1,2,1,1,2,1,2,2,1,1,1,1,1,1,0,2,1,1,1,1,1,0,1,2,2…	AZ916447	-	-	-	-
298	IDP180	mu	IDP8137	chr01	89.5	1.3	Dominant	+/-	ISU Map7	0,0,0,0,0,0,0,0,0,0,0,0,0,0,0,0,0,0,0,0,0,0,0,0,0,0,0,0,0,0,0,0,0,0,0,0,0,0,0,0,0,0,0,0,0,0,0,0,0,0,0,0,0,0,0,0,0,0,0,0,0,0,0,0,0,0,0,0,0,0,0,0,0,0,0,0,0,0,0,0,0,0,0,0,0,0,0,0,0,0,0,0,0,0,0,0,0,0,0,0,0,0,0,0,0,0,1,1,2,0,2,1,1,1,1,1,2,1,0,2,1,1,1,2,0,0,1,1,1,2,2,1,0,1,0,1,1,2,2,0,2,2,1,2,1,1,1,2,2,1,2,0,1,1,1,1,1,0,0,0,1,2,0,1,1,1,1,2,1,0,0,0,1,0,1,1,2,0,1,2,1,2,2,1,1,1,2,2,0,2,1,1,1,1,1,1,1,1,2,2…	MAGIv3.1_74957	MAGIv3.1_74957	chr01	35813576	Consistent
299	IDP461	mu	IDP8137	chr01	89.5	1.4	Dominant	-/+	ISU Map7	1,1,2,2,2,2,2,1,0,1,1,1,1,2,2,2,2,0,0,1,1,1,1,1,2,1,1,2,2,2,2,1,1,1,0,0,1,2,0,1,1,2,2,1,1,1,1,1,1,2,1,2,1,1,1,1,1,0,0,1,2,1,2,0,1,2,1,2,0,1,2,1,2,2,2,2,0,1,2,2,1,0,2,2,1,2,1,2,1,1,2,1,1,1,2,1,1,1,1,1,1,1,0,1,2,2,1,1,2,0,2,1,1,1,1,1,2,1,0,2,1,1,1,2,0,0,1,1,1,2,2,1,0,1,0,1,1,2,2,0,2,2,1,2,1,1,1,2,2,1,2,0,1,1,1,1,1,0,0,0,1,2,0,1,1,1,1,2,1,0,0,0,1,0,1,1,2,0,1,2,1,2,2,1,1,1,2,2,0,2,1,1,1,1,2,1,1,1,2,2…	MEC_28541_P95-Mar06	MEC_28541_P95-Mar06	chr01	35782900	Consistent
300	IDP3976	sk	-	chr01	91	0	Co-Dominant	Size	ISU Map7	1,1,0,2,2,2,2,1,0,1,1,1,1,2,2,2,2,0,0,1,1,1,1,1,2,1,1,2,2,2,2,1,1,1,0,0,1,2,0,1,1,2,2,1,1,1,1,1,1,2,1,2,1,1,1,1,1,0,0,1,2,1,2,0,1,2,1,2,0,0,2,1,2,2,2,2,0,1,2,1,1,0,0,2,1,2,1,2,1,1,2,1,1,1,2,1,1,1,1,1,1,1,0,1,2,2,1,1,2,0,2,1,1,1,1,1,2,1,0,2,1,1,1,2,0,0,1,1,1,2,2,1,0,1,0,1,2,2,2,0,2,1,2,1,1,1,2,2,1,2,1,0,1,1,1,1,0,0,0,0,1,2,0,1,1,1,1,2,1,0,0,0,1,0,1,1,2,0,1,2,1,2,2,1,1,1,2,0,0,2,1,1,1,1,1,1,1,1,2,2…	MAGIv3.1_103317	MAGIv3.1_103317	chr01	35782053	Consistent
301	MAGI_78214	sk	-	chr01	92.6	0	-	SNP	ISU SNP Map	1,1,0,2,2,2,2,1,0,1,0,1,1,2,2,2,2,0,0,1,1,1,1,1,2,1,1,2,2,2,2,1,1,1,0,0,1,2,0,0,1,2,2,1,1,1,1,1,1,2,1,2,1,1,1,1,1,0,0,1,2,1,1,0,1,2,0,0,0,1,2,1,1,2,2,2,0,1,2,1,1,0,2,2,1,2,1,2,1,1,2,1,1,0,2,1,1,1,1,1,1,1,0,1,2,2,1,1,2,0,2,1,1,1,1,1,2,1,0,2,0,1,1,2,0,0,1,1,1,2,2,1,0,1,0,1,1,2,2,0,2,2,1,2,0,1,1,2,2,0,2,0,1,1,1,1,1,0,0,0,1,2,0,1,1,1,1,2,1,0,0,0,1,0,1,1,2,0,1,2,1,2,2,0,1,1,2,2,0,2,1,1,1,1,1,1,1,1,2,2…	MAGIv3.1_78214	MAGIv3.1_78214	chr01	36200682	Consistent
302	MAGI_96605	sk	-	chr01	93.7	0	-	SNP	ISU SNP Map	1,1,0,2,2,2,2,1,0,1,1,1,1,2,1,2,2,0,0,1,1,1,1,1,2,1,1,2,2,2,2,1,1,1,0,0,1,2,0,0,1,2,2,1,1,1,1,1,1,2,1,2,1,1,1,1,1,0,0,1,2,1,1,0,1,2,1,0,0,1,2,1,1,2,1,2,0,1,2,2,1,0,2,2,1,2,1,2,1,1,2,1,1,1,2,1,1,1,1,1,1,1,0,1,2,2,1,1,2,0,1,1,1,0,1,1,2,1,0,2,1,1,1,2,0,0,1,1,1,2,2,1,0,1,0,1,1,2,2,0,2,2,1,2,0,1,1,2,2,1,2,0,1,1,1,1,1,0,0,0,1,2,0,1,1,1,1,2,1,0,0,0,1,0,1,1,2,0,1,0,1,0,2,0,0,1,2,2,0,2,1,2,1,0,0,0,0,1,2,2…	MAGIv3.1_96605	-	-	-	-
303	IDP92	mu	MAGI_96605	chr01	93.7	2.3	Dominant	+/-	ISU Map7	1,1,0,1,2,2,2,1,0,1,1,1,1,2,1,2,2,0,0,1,1,1,1,1,2,1,1,2,2,2,2,1,1,1,0,0,1,2,0,1,1,2,2,1,1,1,1,1,1,2,1,2,1,1,1,1,1,0,0,2,2,1,1,0,1,2,1,1,0,1,2,1,1,2,1,2,0,1,2,2,1,0,2,2,1,2,1,2,1,1,2,1,1,1,2,1,1,1,1,1,1,1,0,1,2,2,1,1,2,0,1,1,1,2,1,1,2,1,0,2,1,1,1,2,0,0,1,1,1,2,2,1,0,1,0,1,1,2,2,0,2,2,1,2,1,1,1,2,2,1,2,0,1,1,1,1,1,0,0,0,1,2,0,1,1,1,1,2,1,0,0,0,1,0,1,1,2,0,1,2,1,2,2,1,1,1,2,1,0,2,1,2,1,1,1,1,1,1,2,2…	MAGIv3.1_80	MAGIv3.1_80	chr01	38309450	Consistent
304	IDP329	mu	MAGI_96605	chr01	93.7	2	Dominant	+/-	ISU Map7	1,1,2,2,2,2,2,1,0,1,1,1,1,2,1,2,2,0,0,1,1,1,2,2,2,1,1,2,2,2,2,1,1,1,0,0,1,2,0,1,1,2,2,1,1,1,1,1,1,2,1,2,1,1,1,1,1,0,0,2,2,1,1,0,1,2,1,1,0,2,2,1,1,2,1,2,0,1,2,2,1,0,2,2,1,2,1,2,1,1,2,1,1,1,2,1,1,1,1,1,1,1,0,1,2,2,1,1,2,0,1,1,1,2,1,1,2,1,0,2,1,1,1,2,0,0,1,1,1,2,2,1,0,1,0,1,1,2,2,0,2,2,1,2,1,1,1,2,2,1,2,0,1,1,1,1,1,0,0,0,1,2,0,1,1,1,1,2,1,0,0,0,1,0,1,1,2,0,1,2,1,2,2,1,1,1,2,1,0,2,1,1,1,1,1,1,1,1,2,2…	MAGIv3.1_81	MAGIv3.1_81	chr01	38306711	Consistent
305	IDP9120	mu	MAGI_96605	chr01	93.7	0.5	Dominant	+/-	ISU Map7	1,1,2,2,2,2,2,1,0,1,1,1,1,2,1,2,2,0,0,1,1,1,2,1,2,1,1,2,2,2,2,1,1,1,0,0,1,2,0,1,1,2,2,1,1,1,1,1,1,2,1,2,1,1,1,1,1,0,0,2,2,1,1,0,1,2,1,1,0,1,2,1,1,2,1,2,0,1,2,2,1,0,2,2,1,2,1,2,1,1,2,1,1,1,2,1,1,1,1,1,1,1,0,1,2,2,1,1,2,0,2,1,1,2,1,1,2,1,0,2,1,1,1,2,0,0,1,1,1,2,2,1,0,1,0,1,1,2,2,0,2,2,1,2,1,1,1,2,2,1,2,0,1,1,1,1,1,0,0,0,1,2,0,1,1,1,1,2,1,0,0,0,1,0,1,1,2,0,1,2,1,2,2,1,1,1,2,1,0,1,1,2,1,1,1,1,1,1,2,2…	MAGIv3.1_97083	MAGIv3.1_97083	chr01	38608571	Consistent
306	IDP1483	mu	MAGI_96605	chr01	93.7	0.7	Co-Dominant	Size	ISU Map7	1,1,0,2,0,2,2,1,0,1,1,0,1,1,1,2,2,0,0,1,1,1,2,1,2,1,1,2,2,2,2,1,1,1,0,0,1,2,0,1,1,2,2,1,1,1,1,1,1,2,1,2,1,1,1,1,1,0,0,2,2,1,1,0,1,2,1,1,0,1,2,1,1,2,1,2,0,1,2,1,1,0,2,2,1,2,1,2,1,1,2,1,1,1,2,1,1,1,1,1,1,1,0,1,2,2,1,1,2,0,2,1,1,0,1,1,2,1,0,2,1,1,1,2,0,0,1,1,1,2,2,1,0,1,0,1,1,2,2,0,2,2,1,2,1,1,1,2,2,1,2,0,1,1,1,1,1,0,0,0,1,0,0,1,1,1,1,2,1,0,0,0,1,0,1,1,2,0,1,2,1,2,0,1,1,1,2,1,0,1,1,2,1,1,1,1,1,1,2,2…	MAGIv3.1_99679	MAGIv3.1_99679	chr01	38675927	Consistent
307	IDP6737	mu	MAGI_96605	chr01	93.7	1.4	Dominant	+/-	ISU Map7	1,1,2,2,2,2,2,1,0,1,1,1,1,2,1,2,2,0,0,1,1,1,2,1,2,1,1,2,2,2,2,1,1,1,0,0,1,2,0,1,1,2,2,1,1,1,1,1,1,2,1,2,1,1,1,1,1,0,0,2,2,1,1,0,1,2,1,1,0,1,2,1,1,2,1,2,0,1,2,1,1,0,2,2,1,2,1,2,1,1,2,1,1,1,2,1,1,1,1,1,1,1,0,2,2,2,1,1,2,0,1,1,1,2,1,1,2,1,0,2,1,1,1,2,0,0,1,1,1,2,2,1,0,1,0,1,1,2,2,0,2,2,1,2,1,1,1,2,2,1,2,0,1,1,1,1,1,0,2,2,1,2,0,1,1,1,1,2,1,0,0,0,1,0,1,1,2,0,1,2,1,2,2,1,1,1,2,1,0,2,1,2,1,1,1,2,2,1,2,2…	MAGIv3.1_6116	MAGIv3.1_6116	chr01	37600019	Consistent
308	TIDP6724	mu	MAGI_96605	chr01	93.7	0.4	Co-Dominant	TGCE	ISU Map7	1,0,0,0,2,0,2,1,0,1,0,1,0,0,1,2,2,0,0,1,1,1,2,1,0,1,1,2,2,2,2,2,1,1,0,0,1,2,0,0,1,0,2,1,0,1,1,2,0,2,1,0,1,1,0,1,1,0,1,0,0,1,1,0,0,0,0,0,1,1,2,1,0,2,0,0,0,0,0,0,0,0,0,0,0,0,0,0,0,0,0,0,0,0,0,0,0,0,0,0,0,0,0,0,0,0,0,0,0,0,0,0,0,0,0,0,0,0,0,0,0,0,0,0,0,0,0,0,0,0,0,0,0,0,0,0,0,0,0,0,0,0,0,0,0,0,0,0,0,0,0,0,0,0,0,0,0,0,0,0,0,0,0,0,0,0,0,0,0,0,0,0,0,0,0,0,0,0,0,0,0,0,0,0,0,0,0,0,0,0,0,0,0,0,0,0,0,0,0,0…	MAGIv3.1_29156	-	-	-	-
309	IDP701	mu	MAGI_96605	chr01	93.7	0.4	Dominant	-/+	ISU Map7	1,0,0,0,2,0,2,1,0,1,0,1,0,2,1,2,2,0,0,1,1,1,2,1,0,1,1,2,2,2,2,2,1,1,0,0,1,2,0,0,1,0,2,1,0,1,1,2,0,2,1,0,1,1,0,1,1,0,1,0,0,1,1,0,0,0,0,0,1,1,2,1,0,2,0,0,0,0,0,0,0,0,0,0,0,0,0,0,0,0,0,0,0,0,0,0,0,0,0,0,0,0,0,0,0,0,0,0,0,0,0,0,0,0,0,0,0,0,0,0,0,0,0,0,0,0,0,0,0,0,0,0,0,0,0,0,0,0,0,0,0,0,0,0,0,0,0,0,0,0,0,0,0,0,0,0,0,0,0,0,0,0,0,0,0,0,0,0,0,0,0,0,0,0,0,0,0,0,0,0,0,0,0,0,0,0,0,0,0,0,0,0,0,0,0,0,0,0,0,0…	MEC_89960_P95-Mar06	-	-	-	-
310	TIDP3137	mu	MAGI_96605	chr01	93.7	1.2	Co-Dominant	TGCE	ISU Map7	1,0,0,0,2,0,2,1,0,1,0,1,0,2,1,2,2,0,0,1,1,1,2,1,0,1,1,2,2,2,2,2,1,0,0,0,1,2,0,0,1,0,2,1,0,1,1,2,0,2,1,0,1,1,0,1,1,0,1,0,0,1,1,0,0,0,0,0,1,1,2,1,0,2,0,0,0,0,0,0,0,0,0,0,0,0,0,0,0,0,0,0,0,0,0,0,0,0,0,0,0,0,0,0,0,0,0,0,0,0,0,0,0,0,0,0,0,0,0,0,0,0,0,0,0,0,0,0,0,0,0,0,0,0,0,0,0,0,0,0,0,0,0,0,0,0,0,0,0,0,0,0,0,0,0,0,0,0,0,0,0,0,0,0,0,0,0,0,0,0,0,0,0,0,0,0,0,0,0,0,0,0,0,0,0,0,0,0,0,0,0,0,0,0,0,0,0,0,0,0…	MEC_91842_P95-Mar06	-	-	-	-
311	IDPC175	mu	MAGI_96605	chr01	93.7	0	0	0	ISU Map7	1,0,0,0,2,0,2,1,0,1,0,1,0,0,1,2,2,0,0,1,1,1,2,1,0,1,1,0,0,2,2,2,1,1,0,0,1,2,0,0,1,0,2,1,0,1,1,2,0,2,1,0,1,1,0,0,1,0,1,0,0,1,1,0,0,0,0,0,1,1,2,0,0,2,0,0,0,0,0,0,0,0,0,0,0,0,0,0,0,0,0,0,0,0,0,0,0,0,0,0,0,0,0,0,0,0,0,0,0,0,0,0,0,0,0,0,0,0,0,0,0,0,0,0,0,0,0,0,0,0,0,0,0,0,0,0,0,0,0,0,0,0,0,0,0,0,0,0,0,0,0,0,0,0,0,0,0,0,0,0,0,0,0,0,0,0,0,0,0,0,0,0,0,0,0,0,0,0,0,0,0,0,0,0,0,0,0,0,0,0,0,0,0,0,0,0,0,0,0,0…	BM074312	BM074312	chr01	38778775	Consistent
312	TIDP5506	mu	MAGI_96605	chr01	93.7	0	Co-Dominant	TGCE	ISU Map7	1,0,0,0,2,0,2,1,0,1,0,1,0,2,1,2,0,0,0,0,1,1,2,1,0,1,1,2,2,2,0,2,1,1,0,0,1,0,0,0,1,0,2,1,0,1,1,2,0,2,1,0,1,1,0,1,1,0,1,0,0,1,1,0,0,0,0,0,1,1,2,1,0,2,0,0,0,0,0,0,0,0,0,0,0,0,0,0,0,0,0,0,0,0,0,0,0,0,0,0,0,0,0,0,0,0,0,0,0,0,0,0,0,0,0,0,0,0,0,0,0,0,0,0,0,0,0,0,0,0,0,0,0,0,0,0,0,0,0,0,0,0,0,0,0,0,0,0,0,0,0,0,0,0,0,0,0,0,0,0,0,0,0,0,0,0,0,0,0,0,0,0,0,0,0,0,0,0,0,0,0,0,0,0,0,0,0,0,0,0,0,0,0,0,0,0,0,0,0,0…	MAGIv3.1_91925	-	-	-	-
313	gnp_QBQ23c09	mu	MAGI_96605	chr01	93.7	0.5	-	-	Genoplante Map	1,0,0,0,2,0,2,1,0,1,0,1,0,2,1,2,2,0,0,1,1,1,2,1,0,1,1,2,2,2,2,2,1,1,0,0,1,0,0,0,0,0,2,1,0,0,0,0,0,2,1,0,0,1,0,1,1,0,0,0,0,1,1,0,0,0,0,0,1,1,0,1,0,0,0,0,0,0,0,0,0,0,0,0,0,0,0,0,0,0,0,0,0,0,0,0,0,0,0,0,0,0,0,0,0,0,0,0,0,0,0,0,0,0,0,0,0,0,0,0,0,0,0,0,0,0,0,0,0,0,0,0,0,0,0,0,0,0,0,0,0,0,0,0,0,0,0,0,0,0,0,0,0,0,0,0,0,0,0,0,0,0,0,0,0,0,0,0,0,0,0,0,0,0,0,0,0,0,0,0,0,0,0,0,0,0,0,0,0,0,0,0,0,0,0,0,0,0,0,0…	CF023070	CF023070	chr01	39180086	Consistent
314	gnp_QCF10g07	mu	MAGI_96605	chr01	93.7	0.5	-	-	Genoplante Map	1,0,0,0,2,0,2,1,0,1,0,1,0,2,1,2,2,0,0,1,1,1,2,1,0,1,1,2,2,2,2,2,1,1,0,0,1,0,0,0,0,0,2,1,0,0,1,1,0,0,1,0,0,1,0,1,1,0,0,0,0,1,1,0,0,0,0,0,1,1,0,1,0,0,0,0,0,0,0,0,0,0,0,0,0,0,0,0,0,0,0,0,0,0,0,0,0,0,0,0,0,0,0,0,0,0,0,0,0,0,0,0,0,0,0,0,0,0,0,0,0,0,0,0,0,0,0,0,0,0,0,0,0,0,0,0,0,0,0,0,0,0,0,0,0,0,0,0,0,0,0,0,0,0,0,0,0,0,0,0,0,0,0,0,0,0,0,0,0,0,0,0,0,0,0,0,0,0,0,0,0,0,0,0,0,0,0,0,0,0,0,0,0,0,0,0,0,0,0,0…	CX129541	-	-	-	-
315	umc1397	mu	MAGI_96605	chr01	93.7	1.8	-	-	MMP	1,0,2,0,2,0,2,1,1,1,1,1,1,0,1,2,2,1,2,1,1,1,2,1,2,1,1,2,2,2,2,1,1,1,1,1,1,0,1,2,1,2,2,1,1,1,1,1,0,2,1,2,1,1,1,0,1,1,1,0,0,0,1,0,0,0,1,0,1,1,2,1,0,1,1,2,2,1,0,1,1,2,2,1,1,2,1,2,1,1,2,1,0,1,2,0,0,1,1,0,1,1,1,1,2,2,1,0,0,1,0,1,0,2,1,1,2,1,2,2,1,1,1,0,1,1,1,2,1,2,0,1,1,1,1,0,1,2,2,1,2,0,1,2,1,1,0,2,1,0,2,2,1,0,1,1,1,1,1,1,0,1,1,1,2,1,0,2,1,1,2,1,1,2,1,1,2,1,1,2,1,2,0,1,1,1,1,1,1,0,2,1,1,1,1,1,0,1,2,2…	CC832177,AI833435,CC832176,CC827980,CC748106	CC832176	chr01	39210404	Consistent
316	AY110052	mu	MAGI_96605	chr01	93.7	3.9	-	-	MMP	1,0,2,0,2,0,2,1,1,1,0,1,1,0,1,1,2,1,2,1,1,1,2,1,2,1,1,2,2,2,2,2,1,1,1,1,1,2,1,0,2,2,2,1,1,1,1,2,0,1,1,2,1,2,1,1,1,1,1,0,0,1,1,1,0,0,1,0,2,1,1,1,0,2,1,2,2,1,0,2,1,2,2,1,0,0,1,2,1,1,2,1,0,1,2,0,0,0,1,0,1,1,1,1,2,2,1,0,2,1,0,1,0,2,1,1,2,1,2,2,1,1,1,2,0,0,1,2,1,2,0,1,1,0,0,0,0,2,2,1,2,0,1,2,1,1,0,2,2,0,2,2,1,0,1,1,1,1,1,1,0,1,1,1,2,0,0,2,1,1,2,1,1,2,1,1,2,0,1,2,1,2,2,1,1,1,1,1,1,0,2,1,0,0,1,1,0,1,0,2…	BV152109,BV152107,BV152117,AW424533,AI941946,AY110052,AW090838,BV152114,BV152116,BV152111,BV152115,BV152118,AI948220,BV152108,BV152112,AW018113,BV152113,BV152110,AI891183	BV152109,BV152107,BV152117,BV152114,BV152116,BV152111,BV152115,BV152118,BV152108,BV152112	chr01	39288440	Consistent
317	MAGI_94451	mu	MAGI_96605	chr01	93.7	2.1	-	SNP	ISU SNP Map	1,1,0,2,2,2,2,1,0,1,1,1,1,1,1,1,2,0,0,1,1,1,2,1,2,1,1,2,2,0,2,1,1,1,0,0,1,2,0,0,1,2,2,1,1,1,1,1,1,2,1,2,2,1,1,1,1,0,0,2,2,1,1,0,1,2,1,0,0,1,2,1,1,1,1,2,0,1,2,1,1,0,2,1,1,2,1,2,2,1,2,1,1,1,2,1,1,1,1,1,1,1,0,1,2,2,1,1,2,0,2,1,1,2,1,1,2,1,0,2,1,1,2,2,0,0,1,1,1,2,2,1,0,1,0,1,1,2,2,0,2,2,1,2,0,1,1,2,2,1,2,0,1,1,1,1,1,0,0,0,1,2,0,1,2,1,1,0,1,0,0,0,1,0,1,1,2,0,1,2,1,2,2,1,1,1,2,1,0,2,1,2,1,1,2,1,1,1,2,2…	MAGIv3.1_94451	MAGIv3.1_94451	chr01	39923484	Consistent
318	MAGI_35511	mu	MAGI_96605	chr01	93.7	0.5	-	SNP	ISU SNP Map	1,1,0,2,2,2,2,1,0,1,1,1,1,2,1,2,2,0,0,1,1,1,2,1,2,1,1,2,2,2,2,1,1,1,0,0,1,2,0,0,1,2,2,1,1,1,1,1,1,2,1,2,1,1,1,1,1,0,0,2,2,1,1,0,2,2,1,0,0,1,2,1,1,2,1,2,0,1,2,1,1,0,2,2,1,2,1,2,1,1,2,1,1,1,2,1,1,1,1,1,1,1,0,1,2,2,1,1,2,0,1,1,1,2,1,1,2,1,0,2,1,1,1,2,0,0,1,1,1,2,2,1,0,1,0,1,1,2,2,0,2,2,1,2,0,1,1,2,2,1,2,0,1,1,1,1,1,0,0,0,1,2,0,1,1,1,1,2,1,0,0,0,1,0,1,1,2,0,1,2,1,2,2,1,1,1,2,1,0,1,1,2,1,1,1,2,1,1,2,2…	MAGIv3.1_35511	MAGIv3.1_35511	chr01	38866350	Consistent
319	MAGI_99679	sk	-	chr01	94.4	0	-	SNP	ISU SNP Map	0,1,0,2,0,2,2,1,0,1,1,1,1,2,1,2,2,0,0,1,1,1,2,1,2,1,1,2,2,2,2,0,1,1,0,0,1,2,0,0,1,2,2,1,1,1,1,1,1,2,1,2,1,1,1,1,1,0,0,2,2,1,1,0,1,2,1,0,0,1,2,1,1,2,1,2,0,1,2,1,1,0,2,2,1,2,1,2,1,1,2,1,1,1,2,1,1,1,1,1,1,1,0,1,2,2,1,1,2,0,1,1,1,2,1,1,2,1,0,2,1,1,1,2,0,0,1,1,1,2,2,1,0,1,0,1,1,2,2,0,2,2,1,2,0,1,1,2,2,1,2,0,1,1,1,1,1,0,0,0,1,2,0,1,1,1,1,2,0,0,0,0,1,0,1,1,2,0,1,2,1,2,2,1,1,1,2,1,0,1,1,2,1,1,1,1,1,1,0,2…	MAGIv3.1_99679	MAGIv3.1_99679	chr01	38675927	Consistent
320	isu40	mu	MAGI_99679	chr01	94.4	2.6	-	-	Genoplante Map	1,0,0,0,2,0,2,1,0,1,0,1,0,1,1,1,2,0,0,1,1,1,2,1,0,1,1,2,2,2,2,0,1,1,0,0,1,2,0,0,1,0,2,1,0,1,1,0,0,2,1,0,1,1,0,1,1,0,1,0,0,1,1,0,0,0,0,0,1,1,2,1,0,1,0,0,0,0,0,0,0,0,0,0,0,0,0,0,0,0,0,0,0,0,0,0,0,0,0,0,0,0,0,0,0,0,0,0,0,0,0,0,0,0,0,0,0,0,0,0,0,0,0,0,0,0,0,0,0,0,0,0,0,0,0,0,0,0,0,0,0,0,0,0,0,0,0,0,0,0,0,0,0,0,0,0,0,0,0,0,0,0,0,0,0,0,0,0,0,0,0,0,0,0,0,0,0,0,0,0,0,0,0,0,0,0,0,0,0,0,0,0,0,0,0,0,0,0,0,0…	-	-	-	-	-
321	IDP4746	sk	-	chr01	98.2	0	Co-Dominant	Size	ISU Map7	1,1,2,2,2,2,2,1,0,1,1,1,1,1,1,1,2,0,0,1,1,1,2,1,2,1,1,2,2,2,2,1,1,1,0,0,2,2,0,1,1,2,2,1,1,1,1,1,1,2,1,2,2,1,1,1,1,0,0,2,2,1,1,0,1,2,1,1,0,1,2,2,1,1,1,2,0,2,2,1,1,0,2,1,1,2,1,2,2,1,2,1,1,1,2,1,1,1,1,1,1,1,0,1,2,2,1,1,2,0,2,1,1,2,1,1,2,2,0,2,1,1,2,2,0,0,1,1,1,2,2,1,0,1,0,1,1,1,2,0,2,2,1,2,1,1,1,2,2,1,2,0,1,1,2,1,1,0,0,0,1,2,0,1,1,2,1,2,1,0,0,0,2,0,1,1,2,0,1,2,1,2,1,1,1,1,2,1,0,2,1,2,1,1,1,1,1,1,2,2…	MAGIv3.1_14785	-	-	-	-
322	IDP6077	mu	IDP4746	chr01	98.2	0.7	Dominant	+/-	ISU Map7	1,1,2,2,2,2,2,1,0,1,1,1,1,1,1,1,2,0,0,1,1,1,2,1,2,1,1,2,2,2,2,1,1,1,0,0,2,2,0,1,2,2,2,1,1,1,1,1,1,2,1,2,2,1,1,1,1,0,0,2,2,1,1,0,1,2,1,1,0,1,2,2,1,1,1,2,0,2,2,2,1,0,2,1,1,2,1,2,2,1,2,1,1,1,2,1,1,1,1,1,1,1,0,1,2,2,2,1,2,0,2,1,1,2,1,1,2,2,0,2,1,1,2,2,0,0,0,1,1,2,1,1,0,1,0,1,1,1,2,0,2,2,1,2,1,2,1,2,2,1,2,0,1,1,2,1,1,0,0,0,1,2,0,1,2,1,1,2,1,0,0,0,2,0,1,1,2,0,1,2,1,2,1,1,1,1,2,1,0,2,1,2,1,1,1,1,1,1,2,2…	MAGIv3.1_114096	MAGIv3.1_114096	chr01	40312872	Consistent
323	IDP6076	mu	IDP4746	chr01	98.2	1.5	Dominant	+/-	ISU Map7	1,1,2,2,2,2,2,1,0,1,1,2,1,1,1,1,2,0,0,1,1,1,2,1,2,1,1,2,2,2,2,1,1,1,0,0,2,2,0,1,2,2,2,1,1,1,1,1,1,2,1,2,2,1,1,1,1,0,0,2,2,1,1,0,1,2,1,1,0,1,2,2,1,1,1,2,0,2,2,2,1,0,2,1,1,2,1,2,2,1,2,1,1,1,2,1,1,1,1,1,1,1,0,1,2,2,2,1,2,0,2,1,1,2,1,2,2,2,0,2,1,1,1,2,0,0,1,1,1,2,1,1,0,1,0,1,1,1,2,0,2,2,1,2,1,2,1,2,2,1,2,0,1,1,2,1,1,0,0,0,1,2,0,1,2,1,1,2,1,0,0,0,2,0,1,1,2,0,1,2,1,2,1,1,1,1,2,1,0,2,1,2,2,1,1,1,1,1,2,2…	MAGIv3.1_114095	MAGIv3.1_114095	chr01	40310049	Consistent
324	IDP81	mu	IDP4746	chr01	98.2	3.4	Dominant	+/-	ISU Map7	1,1,2,2,2,2,2,1,0,1,1,1,1,1,1,1,2,0,0,1,1,1,2,2,2,1,1,2,2,2,2,1,1,1,0,0,2,2,0,1,2,2,2,1,1,1,1,1,1,2,1,2,2,1,1,1,1,0,0,2,2,1,1,0,1,2,1,1,0,2,2,2,1,1,1,2,0,2,2,2,1,0,2,1,1,2,1,2,2,1,2,1,1,1,2,1,1,1,1,1,2,2,0,2,2,2,2,1,2,0,2,1,1,2,1,2,2,2,0,2,1,1,2,2,0,0,1,1,1,2,1,1,0,1,0,1,1,1,2,0,2,2,1,2,1,2,1,2,0,1,2,0,1,1,2,1,1,0,0,0,1,2,0,1,2,1,1,2,1,0,0,0,2,0,1,1,2,0,1,2,1,2,2,1,1,1,2,1,0,2,1,2,1,1,1,1,1,1,2,2…	MAGIv3.1_82090	MAGIv3.1_82090	chr01	40348147	Consistent
325	IDP7168	sk	-	chr01	101.3	0	Dominant	+/-	ISU Map7	1,1,2,2,2,2,2,2,0,1,1,2,1,2,1,1,2,0,0,2,1,1,2,1,2,1,1,2,2,2,2,1,1,1,0,0,2,2,0,1,1,2,2,2,1,1,1,2,1,2,1,2,2,1,1,1,1,0,0,2,2,1,1,0,1,2,1,1,0,1,2,2,1,1,1,2,0,2,2,1,1,0,2,1,1,2,1,2,1,1,2,1,1,1,2,2,2,1,2,1,2,1,0,2,0,0,2,1,2,0,2,1,1,2,1,1,2,2,0,2,1,1,2,2,0,0,1,1,1,2,1,1,0,1,0,1,1,1,2,0,2,2,1,2,1,2,1,2,2,1,2,0,1,1,2,1,1,0,0,0,1,2,0,1,2,2,1,2,1,0,0,0,2,0,1,1,2,0,1,2,1,1,2,1,1,1,2,1,0,2,1,2,1,1,1,1,1,1,2,2…	MAGIv3.1_13413	MAGIv3.1_13413	chr01	41665345	Consistent
326	MAGI_81859	sk	-	chr01	103.5	0	-	SNP	ISU SNP Map	1,1,0,2,2,2,2,2,0,1,1,1,1,1,1,1,2,0,0,2,1,1,2,1,2,1,1,2,2,2,2,2,1,1,0,0,2,2,0,0,1,2,2,2,1,1,1,2,1,2,1,2,2,1,1,1,1,0,0,2,2,1,1,0,1,2,1,0,0,1,2,2,1,1,1,2,0,2,2,1,1,0,2,1,1,2,2,2,2,1,2,1,1,1,2,1,1,1,1,1,1,1,0,1,2,2,2,1,2,0,1,1,1,2,1,1,2,2,0,2,1,1,2,2,0,0,1,1,1,2,1,1,0,1,0,1,1,1,2,0,2,2,1,2,0,2,1,2,2,1,2,0,1,1,2,1,0,0,0,0,1,2,0,1,2,2,1,2,1,0,0,0,2,0,1,1,2,0,1,2,1,1,2,1,1,1,2,1,0,2,1,2,1,2,1,1,1,1,2,2…	MAGIv3.1_81859	MAGIv3.1_81859	chr01	43012726	Consistent
327	IDP8266	mu	MAGI_81859	chr01	103.5	0.7	Co-Dominant	Size	ISU Map7	1,1,0,2,2,2,2,1,0,1,1,1,1,1,1,1,2,0,0,2,1,1,2,1,2,1,1,2,2,2,2,2,1,1,0,0,2,2,0,1,1,0,2,2,1,1,1,2,1,2,1,2,2,1,1,1,1,0,0,2,2,1,1,0,1,2,1,1,0,1,0,2,1,1,1,2,0,2,2,1,1,0,2,1,1,2,2,2,2,1,2,1,1,1,2,1,1,1,1,1,1,1,0,1,2,2,2,1,2,0,1,1,1,2,1,1,2,2,0,2,1,1,2,2,0,0,1,1,1,2,1,1,0,1,0,1,1,1,2,0,2,2,1,2,1,2,1,2,2,1,2,0,1,1,2,1,1,0,0,0,1,2,0,1,2,2,1,2,1,0,0,0,2,0,1,1,2,0,1,2,1,1,2,1,1,1,2,1,0,2,1,2,1,2,1,1,1,1,2,2…	MAGIv3.1_102162	MAGIv3.1_102162	chr01	43311688	Consistent
328	IDP430	mu	MAGI_81859	chr01	103.5	1.5	Dominant	+/-	ISU Map7	1,1,2,2,2,2,2,1,0,1,1,1,1,1,1,1,2,0,0,2,1,1,2,1,2,1,1,2,2,2,2,2,1,1,0,0,2,2,0,1,1,2,2,2,1,1,1,2,1,2,1,2,2,1,1,1,1,0,0,2,2,1,1,0,1,2,1,1,0,1,2,2,1,1,1,2,0,2,2,1,1,0,2,1,1,2,2,2,2,1,2,1,1,1,2,1,1,1,1,1,1,1,0,1,2,2,2,1,2,0,1,1,1,2,1,1,2,2,0,2,1,1,2,2,0,0,1,1,1,2,1,1,0,2,0,1,2,1,2,0,2,2,1,2,1,2,1,2,2,1,2,0,1,1,2,1,1,0,2,2,1,2,0,1,2,2,1,2,1,0,0,0,2,0,1,1,2,0,1,2,1,1,2,1,1,1,2,1,0,1,1,2,1,2,1,1,1,1,2,2…	MAGIv4.0_67710	MAGIv4.0_67710	chr01	43286876	Consistent
329	IDP142	mu	MAGI_81859	chr01	103.5	0.3	Dominant	+/-	ISU Map7	1,1,2,2,2,2,2,1,0,1,1,1,1,1,1,1,2,0,0,2,1,1,2,1,2,1,1,2,2,2,2,1,1,1,0,0,2,2,0,1,1,2,2,1,1,1,1,2,1,2,1,2,2,1,1,1,1,0,0,2,2,1,1,0,1,2,1,1,0,1,2,2,1,1,1,2,0,2,2,1,1,0,2,1,1,2,1,2,2,1,2,1,1,1,2,1,1,1,1,1,1,2,0,1,2,2,2,1,2,0,2,1,1,2,1,1,2,2,0,2,1,1,2,2,0,0,1,1,1,2,1,1,0,1,0,1,1,1,2,0,2,2,1,2,1,2,1,2,2,1,2,0,1,1,2,1,1,0,2,2,1,2,0,1,2,2,1,2,1,0,0,0,2,0,1,1,2,0,1,2,1,1,2,1,1,1,2,1,0,2,1,2,1,1,1,1,1,1,2,2…	MEC_48142_P95-Mar06	MEC_48142_P95-Mar06	chr01	41390809	Consistent
330	IDP7291	mu	MAGI_81859	chr01	103.5	0.3	Co-Dominant	Size	ISU Map7	1,1,0,2,2,2,2,1,0,1,1,1,1,1,1,1,2,0,0,2,1,1,2,1,2,1,1,2,2,2,2,1,1,1,0,0,2,2,0,1,1,2,2,1,1,1,1,2,1,2,1,2,2,1,1,1,1,0,0,2,2,1,1,0,1,2,1,1,0,1,2,2,1,1,1,2,0,2,2,1,1,0,2,1,1,2,1,2,2,1,2,1,1,1,2,1,1,1,1,1,1,1,0,1,2,2,2,1,2,0,0,1,1,2,1,1,2,2,0,2,1,1,2,2,0,0,1,1,1,2,1,1,0,1,0,1,1,1,2,0,2,2,1,2,1,2,1,2,2,1,2,0,1,1,0,1,1,0,0,0,1,2,0,1,2,2,1,2,1,0,0,0,2,0,1,1,2,0,1,2,1,1,2,1,1,1,2,1,0,2,1,2,1,1,1,1,1,1,2,2…	MAGIv3.1_91638	MAGIv3.1_91638	chr01	41366637	Consistent
331	IDP8216	mu	MAGI_81859	chr01	103.5	0.4	Co-Dominant	Size	ISU Map7	1,1,0,2,2,2,2,1,0,1,1,1,1,1,1,1,2,0,0,2,1,1,2,1,2,1,0,2,2,2,2,2,1,1,0,0,2,2,0,1,1,2,2,2,1,1,1,2,1,2,1,2,2,1,1,1,1,0,0,2,2,1,1,0,1,2,1,1,0,1,2,2,1,1,1,2,0,2,2,1,1,0,2,1,1,2,1,2,2,1,2,1,1,1,2,1,1,1,1,1,1,1,0,1,2,2,2,1,2,0,2,1,1,2,1,1,2,2,0,2,1,1,2,2,0,0,1,1,1,2,1,1,0,1,0,1,1,1,2,0,2,2,1,2,0,2,1,2,2,1,2,0,1,1,2,1,1,0,0,0,1,2,0,1,2,2,1,2,1,0,0,0,2,0,1,1,2,0,1,2,1,1,2,1,1,1,2,1,0,2,1,2,1,1,1,1,1,1,2,2…	MAGIv3.1_72773	MAGIv3.1_72773	chr01	42026920	Consistent
332	MAGI_98111	mu	MAGI_81859	chr01	103.5	0.3	-	SNP	ISU SNP Map	1,1,0,2,2,2,2,2,0,1,1,1,1,1,1,1,2,0,0,2,1,0,2,1,2,1,1,2,2,2,2,0,1,1,0,0,2,2,0,0,1,2,2,2,1,1,1,2,1,2,1,2,2,1,1,1,1,0,0,2,2,1,1,0,1,2,1,0,0,1,2,2,1,1,1,2,0,2,2,1,1,0,2,1,1,2,1,2,2,1,2,1,1,1,2,1,1,1,1,1,1,1,0,1,2,2,2,1,2,0,2,1,1,2,1,1,2,2,0,2,1,1,2,2,0,0,1,1,1,2,1,1,0,1,0,1,1,1,2,0,2,2,1,2,0,2,1,2,2,1,2,0,1,1,2,1,1,0,0,0,1,2,0,1,2,2,1,2,1,0,0,0,2,0,1,1,2,0,1,2,1,1,2,1,1,1,2,1,0,2,1,2,1,1,1,1,1,1,2,2…	MAGIv3.1_98111	-	-	-	-
333	MAGI_24405	mu	MAGI_81859	chr01	103.5	1.3	-	SNP	ISU SNP Map	1,1,0,2,2,2,2,2,0,1,1,1,1,1,1,1,2,0,0,2,1,1,2,1,2,1,1,2,2,2,2,0,1,1,0,0,2,2,0,0,1,2,2,1,1,1,1,2,1,2,1,2,2,1,1,1,1,0,0,2,2,1,1,0,1,2,1,0,0,1,2,2,1,1,1,2,0,2,2,1,1,0,2,1,1,2,1,2,2,1,2,1,1,1,2,1,1,1,1,1,1,1,0,1,2,2,2,1,2,0,1,1,1,2,1,1,2,2,0,2,1,1,2,2,0,0,1,1,1,2,1,1,0,1,0,1,1,1,2,0,2,2,1,2,0,2,1,2,2,1,2,0,1,1,2,1,1,0,0,0,1,2,0,1,2,2,1,2,1,0,0,0,2,0,1,1,2,0,1,2,1,1,2,1,1,1,2,1,0,2,1,2,1,1,1,1,1,1,2,2…	MAGIv3.1_24405	MAGIv3.1_24405	chr01	41230824	Consistent
334	isu69b	mu	MAGI_81859	chr01	103.5	1	-	-	Genoplante Map	1,0,0,0,2,0,2,2,0,1,0,1,0,1,1,1,2,0,0,2,1,1,2,1,0,1,1,2,2,2,2,2,1,1,0,0,2,2,0,0,0,0,0,0,0,0,0,0,0,0,0,0,0,0,0,0,0,0,0,0,0,0,0,0,0,0,0,0,1,0,2,2,0,1,0,0,0,0,0,0,0,0,0,0,0,0,0,0,0,0,0,0,0,0,0,0,0,0,0,0,0,0,0,0,0,0,0,0,0,0,0,0,0,0,0,0,0,0,0,0,0,0,0,0,0,0,0,0,0,0,0,0,0,0,0,0,0,0,0,0,0,0,0,0,0,0,0,0,0,0,0,0,0,0,0,0,0,0,0,0,0,0,0,0,0,0,0,0,0,0,0,0,0,0,0,0,0,0,0,0,0,0,0,0,0,0,0,0,0,0,0,0,0,0,0,0,0,0,0,0…	-	-	-	-	-
335	gnp_QBH9f04b	mu	MAGI_81859	chr01	103.5	0.5	-	-	Genoplante Map	0,0,0,0,2,0,2,2,0,1,0,1,0,1,1,1,2,0,0,2,1,1,2,1,0,1,1,2,2,2,2,0,1,1,0,0,2,0,0,0,0,0,2,1,0,0,0,2,0,2,1,0,0,1,0,1,1,0,0,0,0,1,1,0,0,0,0,0,1,1,0,2,0,0,0,0,0,0,0,0,0,0,0,0,0,0,0,0,0,0,0,0,0,0,0,0,0,0,0,0,0,0,0,0,0,0,0,0,0,0,0,0,0,0,0,0,0,0,0,0,0,0,0,0,0,0,0,0,0,0,0,0,0,0,0,0,0,0,0,0,0,0,0,0,0,0,0,0,0,0,0,0,0,0,0,0,0,0,0,0,0,0,0,0,0,0,0,0,0,0,0,0,0,0,0,0,0,0,0,0,0,0,0,0,0,0,0,0,0,0,0,0,0,0,0,0,0,0,0,0…	CF005284	CF005284	chr01	40879804	Consistent
336	TIDP3134	mu	MAGI_81859	chr01	103.5	0	Co-Dominant	TGCE	ISU Map7	1,0,0,0,2,0,2,2,0,1,0,1,0,1,1,1,2,0,0,2,1,1,2,1,0,1,1,2,2,2,2,2,1,1,0,0,2,2,0,0,1,0,2,1,0,1,1,2,0,2,1,0,2,1,0,1,1,0,1,0,0,1,1,0,0,0,0,0,1,1,2,2,0,1,0,0,0,0,0,0,0,0,0,0,0,0,0,0,0,0,0,0,0,0,0,0,0,0,0,0,0,0,0,0,0,0,0,0,0,0,0,0,0,0,0,0,0,0,0,0,0,0,0,0,0,0,0,0,0,0,0,0,0,0,0,0,0,0,0,0,0,0,0,0,0,0,0,0,0,0,0,0,0,0,0,0,0,0,0,0,0,0,0,0,0,0,0,0,0,0,0,0,0,0,0,0,0,0,0,0,0,0,0,0,0,0,0,0,0,0,0,0,0,0,0,0,0,0,0,0…	MAGIv4.0_88144	MAGIv4.0_88144	chr01	41364890	Consistent
337	npi242b	mu	MAGI_81859	chr01	103.5	0	-	-	MMP	1,0,2,0,0,0,2,2,1,1,0,1,1,1,1,1,2,1,1,0,1,1,2,1,2,1,1,2,2,2,2,0,1,1,0,1,2,2,1,0,1,2,2,1,1,1,1,2,0,2,0,2,2,1,1,1,1,1,1,0,0,1,1,2,0,0,0,0,1,1,2,2,0,1,1,2,2,2,0,1,1,2,2,1,0,2,1,2,2,1,2,1,0,1,2,0,0,1,1,0,0,1,1,0,0,2,2,0,0,0,0,1,0,0,1,1,2,2,0,0,1,1,2,2,0,0,1,2,1,2,0,1,0,0,0,0,0,1,0,2,2,0,1,2,1,2,0,2,2,0,2,2,1,0,2,1,1,1,1,2,0,2,1,0,2,0,0,2,1,2,2,0,0,2,0,1,2,1,1,2,1,1,2,1,1,1,0,1,1,0,0,0,1,1,1,1,0,1,2,2…	-	-	-	-	-
338	TIDP2962	mu	MAGI_81859	chr01	103.5	0.7	Co-Dominant	TGCE	ISU Map7	1,0,0,0,2,0,2,2,0,1,0,1,0,1,1,1,2,0,0,2,1,1,2,1,0,1,1,2,2,2,2,2,1,0,0,0,2,2,0,0,1,0,2,2,0,1,1,2,0,2,1,0,2,1,0,1,1,0,1,0,0,1,1,0,0,0,0,0,1,1,2,2,0,1,0,0,0,0,0,0,0,0,0,0,0,0,0,0,0,0,0,0,0,0,0,0,0,0,0,0,0,0,0,0,0,0,0,0,0,0,0,0,0,0,0,0,0,0,0,0,0,0,0,0,0,0,0,0,0,0,0,0,0,0,0,0,0,0,0,0,0,0,0,0,0,0,0,0,0,0,0,0,0,0,0,0,0,0,0,0,0,0,0,0,0,0,0,0,0,0,0,0,0,0,0,0,0,0,0,0,0,0,0,0,0,0,0,0,0,0,0,0,0,0,0,0,0,0,0,0…	MEC_84092_P95-Mar06	MEC_84092_P95-Mar06	chr01	41600083	Consistent
339	TIDP3611	mu	MAGI_81859	chr01	103.5	0	Co-Dominant	TGCE	ISU Map7	1,0,0,0,2,0,2,2,0,1,0,1,0,1,1,1,2,0,0,2,1,1,2,1,0,1,1,2,2,2,2,2,1,1,0,0,2,2,0,0,1,0,2,2,0,1,1,2,0,2,1,0,2,1,0,1,1,0,1,0,0,1,1,0,0,0,0,0,1,1,2,2,0,1,0,0,0,0,0,0,0,0,0,0,0,0,0,0,0,0,0,0,0,0,0,0,0,0,0,0,0,0,0,0,0,0,0,0,0,0,0,0,0,0,0,0,0,0,0,0,0,0,0,0,0,0,0,0,0,0,0,0,0,0,0,0,0,0,0,0,0,0,0,0,0,0,0,0,0,0,0,0,0,0,0,0,0,0,0,0,0,0,0,0,0,0,0,0,0,0,0,0,0,0,0,0,0,0,0,0,0,0,0,0,0,0,0,0,0,0,0,0,0,0,0,0,0,0,0,0…	MAGIv3.1_81859	MAGIv3.1_81859	chr01	43012726	Consistent
340	IDP1632	mu	MAGI_81859	chr01	103.5	0.4	Dominant	+/-	ISU Map7	1,0,0,0,2,0,2,2,0,1,0,1,0,1,1,1,2,0,0,2,1,1,2,1,0,1,1,2,2,2,2,2,1,1,0,0,2,2,0,0,1,0,2,2,0,1,1,2,0,2,1,0,2,1,0,1,1,0,1,0,0,1,1,0,0,0,0,0,1,2,2,2,0,1,0,0,0,0,0,0,0,0,0,0,0,0,0,0,0,0,0,0,0,0,0,0,0,0,0,0,0,0,0,0,0,0,0,0,0,0,0,0,0,0,0,0,0,0,0,0,0,0,0,0,0,0,0,0,0,0,0,0,0,0,0,0,0,0,0,0,0,0,0,0,0,0,0,0,0,0,0,0,0,0,0,0,0,0,0,0,0,0,0,0,0,0,0,0,0,0,0,0,0,0,0,0,0,0,0,0,0,0,0,0,0,0,0,0,0,0,0,0,0,0,0,0,0,0,0,0…	MEC_13310_P95-Mar06	MEC_13310_P95-Mar06	chr01	43670009	Consistent
341	IDP6818	mu	MAGI_81859	chr01	103.5	0.4	Co-Dominant	Size	ISU Map7	1,0,0,0,2,0,2,2,0,1,0,1,0,1,1,1,2,0,0,2,1,1,2,1,0,1,1,2,2,2,2,2,0,1,0,0,2,2,0,0,1,0,2,2,0,1,1,2,0,2,1,0,2,1,0,1,1,0,1,0,0,1,1,0,0,0,0,0,1,1,2,2,0,1,0,0,0,0,0,0,0,0,0,0,0,0,0,0,0,0,0,0,0,0,0,0,0,0,0,0,0,0,0,0,0,0,0,0,0,0,0,0,0,0,0,0,0,0,0,0,0,0,0,0,0,0,0,0,0,0,0,0,0,0,0,0,0,0,0,0,0,0,0,0,0,0,0,0,0,0,0,0,0,0,0,0,0,0,0,0,0,0,0,0,0,0,0,0,0,0,0,0,0,0,0,0,0,0,0,0,0,0,0,0,0,0,0,0,0,0,0,0,0,0,0,0,0,0,0,0…	MAGIv3.1_92370	MAGIv3.1_92370	chr01	43290695	Consistent
342	umc1479	mu	MAGI_81859	chr01	103.5	0	-	-	MMP	0,0,2,0,2,0,2,2,1,1,1,1,1,1,1,1,2,1,1,2,1,1,2,1,2,1,1,2,2,2,2,2,1,1,1,1,0,0,1,2,1,2,2,0,0,0,1,2,0,2,1,2,2,1,1,0,1,1,1,0,0,0,0,0,0,0,1,0,0,1,2,2,0,1,1,2,2,2,0,1,1,2,2,1,1,2,2,2,2,1,2,1,0,1,2,0,0,1,1,0,1,1,1,1,0,2,2,0,2,1,2,1,0,2,1,1,2,2,2,2,1,0,2,2,0,2,1,2,1,2,0,1,1,1,1,0,1,1,2,2,2,0,1,2,1,2,0,2,2,0,2,2,1,0,2,1,1,1,1,1,0,2,1,1,2,2,0,2,1,1,2,1,2,2,1,1,2,1,1,2,1,1,2,1,1,1,2,1,1,0,2,1,1,2,1,1,0,1,2,2…	CC743995,AC186336,CC823238,BE575033,AY109742,AW331079,AI881530,AI770469,AI834587,AI600816,CC740471,CC743996	BE575033,AY109742,AW331079,AI881530,AI770469,AI834587	chr01	43289149	Consistent
343	asg26	mu	MAGI_81859	chr01	103.5	1	-	-	MMP	0,0,0,0,2,0,0,2,1,1,1,1,1,1,1,1,2,1,1,2,1,1,2,1,2,1,1,2,2,2,2,2,1,1,1,1,2,2,1,2,1,2,2,2,1,1,1,2,0,2,1,2,2,1,1,1,1,1,1,0,0,1,1,2,0,0,1,0,1,1,2,2,0,1,1,2,2,2,0,1,1,2,2,1,0,2,2,2,2,1,2,1,0,1,2,0,0,1,1,0,1,1,1,1,0,2,0,0,2,1,2,1,0,2,1,1,2,2,2,2,1,1,2,2,1,1,1,2,1,2,0,1,1,1,1,0,1,1,2,0,2,0,1,2,1,2,0,2,2,0,2,2,1,0,2,1,1,1,1,1,0,2,1,1,2,0,0,2,1,1,2,1,2,2,1,1,2,1,1,2,1,1,2,1,1,1,2,1,1,0,0,1,1,2,0,1,0,1,2,2…	-	-	-	-	-
344	fbnlg439	mu	MAGI_81859	chr01	103.5	0	-	-	Genoplante Map	1,0,0,0,2,0,2,2,0,1,0,1,0,1,1,1,2,0,0,2,1,1,2,1,0,1,1,2,2,2,2,2,1,1,0,0,2,0,0,0,0,0,2,0,0,0,1,2,0,2,1,0,0,1,0,1,1,0,0,0,0,1,1,0,0,0,0,0,1,1,2,2,0,1,0,0,0,0,0,0,0,0,0,0,0,0,0,0,0,0,0,0,0,0,0,0,0,0,0,0,0,0,0,0,0,0,0,0,0,0,0,0,0,0,0,0,0,0,0,0,0,0,0,0,0,0,0,0,0,0,0,0,0,0,0,0,0,0,0,0,0,0,0,0,0,0,0,0,0,0,0,0,0,0,0,0,0,0,0,0,0,0,0,0,0,0,0,0,0,0,0,0,0,0,0,0,0,0,0,0,0,0,0,0,0,0,0,0,0,0,0,0,0,0,0,0,0,0,0,0…	CC758852,CC758853,CC754434	CC758853	chr01	43864440	Consistent
345	MAGI_88653	sk	-	chr01	103.6	0	-	SNP	ISU SNP Map	1,1,0,2,2,2,2,2,0,1,1,1,1,1,1,1,2,0,0,2,1,1,2,1,2,1,1,2,2,2,2,2,1,1,0,0,2,2,0,0,1,2,2,2,1,1,1,0,1,2,1,2,2,1,1,1,1,0,0,2,2,1,1,0,1,2,1,0,0,1,2,2,1,1,1,2,0,2,2,1,1,0,2,1,1,2,2,2,2,1,2,1,1,1,2,1,1,1,1,1,1,1,0,1,2,2,2,1,2,0,1,1,1,2,1,1,2,2,0,2,1,1,2,2,0,0,1,1,1,2,1,1,0,1,0,1,1,1,2,0,2,2,1,2,0,2,1,2,2,1,2,0,1,1,2,1,1,0,0,0,1,2,0,1,2,2,1,2,1,0,0,0,2,0,1,1,2,0,1,2,1,1,2,1,1,1,2,1,0,2,1,2,1,2,1,1,1,1,2,2…	MAGIv3.1_88653	MAGIv3.1_88653	chr01	43286668	Consistent
346	IDP853	mu	MAGI_88653	chr01	103.6	2	Dominant	-/+	ISU Map7	1,0,0,0,2,0,2,2,0,1,0,1,0,1,1,1,2,0,0,2,1,1,2,1,0,1,1,2,2,2,2,2,1,1,0,0,2,2,0,0,1,0,2,2,0,1,1,1,0,1,1,0,2,1,0,1,1,0,1,0,0,1,1,0,0,0,0,0,1,1,2,2,0,1,0,0,0,0,0,0,0,0,0,0,0,0,0,0,0,0,0,0,0,0,0,0,0,0,0,0,0,0,0,0,0,0,0,0,0,0,0,0,0,0,0,0,0,0,0,0,0,0,0,0,0,0,0,0,0,0,0,0,0,0,0,0,0,0,0,0,0,0,0,0,0,0,0,0,0,0,0,0,0,0,0,0,0,0,0,0,0,0,0,0,0,0,0,0,0,0,0,0,0,0,0,0,0,0,0,0,0,0,0,0,0,0,0,0,0,0,0,0,0,0,0,0,0,0,0,0…	MEC_87768_P95-Mar06	-	-	-	-
347	gnp_AI973385	mu	MAGI_88653	chr01	103.6	1.2	-	-	Genoplante Map	1,0,0,0,2,0,2,2,0,1,0,1,0,1,1,1,2,0,0,2,1,1,2,1,0,1,1,2,2,2,2,2,1,1,0,0,2,0,0,0,0,0,2,2,0,0,0,2,0,2,1,0,0,1,0,1,1,0,0,0,0,1,1,0,0,0,0,0,1,1,0,2,0,0,0,0,0,0,0,0,0,0,0,0,0,0,0,0,0,0,0,0,0,0,0,0,0,0,0,0,0,0,0,0,0,0,0,0,0,0,0,0,0,0,0,0,0,0,0,0,0,0,0,0,0,0,0,0,0,0,0,0,0,0,0,0,0,0,0,0,0,0,0,0,0,0,0,0,0,0,0,0,0,0,0,0,0,0,0,0,0,0,0,0,0,0,0,0,0,0,0,0,0,0,0,0,0,0,0,0,0,0,0,0,0,0,0,0,0,0,0,0,0,0,0,0,0,0,0,0…	AI973385	AI973385	chr01	43927372	Consistent
348	gnp_QBE2b06	mu	MAGI_88653	chr01	103.6	0	-	-	Genoplante Map	1,0,0,0,2,0,2,2,0,1,0,1,0,1,1,1,2,0,0,2,1,1,2,1,0,1,1,2,2,2,2,2,1,1,0,0,2,0,0,0,0,0,2,2,0,0,0,0,0,2,1,0,0,1,0,1,1,0,0,0,0,1,1,0,0,0,0,0,1,1,0,2,0,0,0,0,0,0,0,0,0,0,0,0,0,0,0,0,0,0,0,0,0,0,0,0,0,0,0,0,0,0,0,0,0,0,0,0,0,0,0,0,0,0,0,0,0,0,0,0,0,0,0,0,0,0,0,0,0,0,0,0,0,0,0,0,0,0,0,0,0,0,0,0,0,0,0,0,0,0,0,0,0,0,0,0,0,0,0,0,0,0,0,0,0,0,0,0,0,0,0,0,0,0,0,0,0,0,0,0,0,0,0,0,0,0,0,0,0,0,0,0,0,0,0,0,0,0,0,0…	CD997669	CD997669	chr01	43849895	Consistent
349	bnlg439	mu	MAGI_88653	chr01	103.6	0	-	-	MMP	1,0,2,0,2,0,2,2,1,1,1,1,1,1,1,1,2,1,1,2,1,1,2,1,2,1,1,2,2,2,2,2,1,1,2,1,2,2,1,2,1,2,2,2,1,1,1,2,0,2,1,2,2,1,1,1,1,1,1,0,0,1,1,2,0,0,2,0,1,1,2,2,0,1,1,2,2,2,0,1,1,2,2,1,1,2,2,2,2,1,2,1,0,1,2,0,0,1,1,0,1,1,1,1,0,2,2,0,2,1,0,1,0,2,2,1,2,2,2,0,1,1,2,2,1,2,1,2,1,0,0,1,1,1,1,0,0,1,0,2,2,0,0,0,1,2,0,2,0,0,2,2,1,0,2,0,1,0,1,1,0,0,0,1,2,0,0,0,1,1,2,1,2,2,1,1,2,1,1,2,1,1,2,1,1,1,2,0,1,0,2,1,1,2,1,1,0,1,2,2…	CC758852,CC758853,CC754434	CC758853	chr01	43864440	Consistent
350	bnlg1203	mu	MAGI_88653	chr01	103.6	0	-	-	MMP	1,0,2,0,2,0,2,2,1,1,1,1,1,1,1,1,0,1,1,2,1,1,2,1,2,1,1,2,2,2,2,2,1,1,2,1,2,0,1,2,1,2,2,2,1,1,1,2,0,2,1,2,2,1,1,1,1,1,1,0,0,1,1,0,0,0,1,0,1,1,2,2,0,1,1,2,2,2,0,1,1,0,2,1,1,2,2,2,2,1,2,1,0,1,2,0,0,1,1,0,1,1,1,1,0,2,2,0,0,1,0,1,0,0,2,1,2,2,2,2,1,1,2,0,1,2,1,2,1,2,0,1,1,1,1,0,1,1,2,2,2,0,1,2,1,2,0,2,2,0,2,2,1,0,2,1,1,1,1,1,0,0,1,1,2,0,0,2,1,1,2,1,2,2,1,1,2,1,1,2,1,1,0,1,1,1,2,1,1,0,0,1,1,2,1,1,0,1,2,2…	CC754434,CC745120,CC758852,CC758853	-	-	-	-
351	gnp_QAY3d07a	mu	MAGI_88653	chr01	103.6	1.6	-	-	Genoplante Map	1,0,0,0,2,0,2,2,0,1,0,1,0,1,1,1,2,0,0,2,1,1,2,1,0,1,1,2,2,2,2,2,1,1,0,0,2,0,0,0,0,0,2,2,0,0,1,2,0,2,1,0,0,1,0,1,1,0,0,0,0,1,1,0,0,0,0,0,1,1,0,2,0,0,0,0,0,0,0,0,0,0,0,0,0,0,0,0,0,0,0,0,0,0,0,0,0,0,0,0,0,0,0,0,0,0,0,0,0,0,0,0,0,0,0,0,0,0,0,0,0,0,0,0,0,0,0,0,0,0,0,0,0,0,0,0,0,0,0,0,0,0,0,0,0,0,0,0,0,0,0,0,0,0,0,0,0,0,0,0,0,0,0,0,0,0,0,0,0,0,0,0,0,0,0,0,0,0,0,0,0,0,0,0,0,0,0,0,0,0,0,0,0,0,0,0,0,0,0,0…	CD990709	-	-	-	-
352	MAGI_95553	sk	-	chr01	104.6	0	-	SNP	ISU SNP Map	1,1,0,2,2,2,2,2,0,1,1,1,1,1,1,1,2,0,0,2,1,1,2,0,2,1,1,2,2,2,2,2,1,1,0,0,2,2,0,0,1,2,2,2,1,1,1,0,1,2,1,2,2,1,1,1,1,0,0,2,2,1,1,0,1,2,1,0,0,1,2,2,1,1,1,2,0,2,2,1,1,0,2,1,1,2,2,2,2,1,2,1,1,1,2,2,1,1,1,1,1,1,0,1,2,2,2,1,2,0,1,1,2,2,2,1,2,2,0,2,1,1,2,2,0,0,1,1,1,2,1,1,0,1,0,1,1,1,2,0,2,2,1,2,0,2,1,2,2,1,2,0,1,1,2,1,1,0,0,0,1,0,0,1,2,2,1,2,1,0,0,0,2,0,1,1,2,0,1,2,1,1,2,1,1,1,2,1,0,2,1,2,1,2,1,1,1,1,2,2…	MAGIv3.1_95553	MAGIv3.1_95553	chr01	43936187	Consistent
353	lim51	mu	MAGI_95553	chr01	104.6	3.9	-	-	MMP	1,0,2,0,2,0,2,2,1,1,1,1,1,1,1,1,2,1,1,2,1,1,2,1,2,1,1,2,2,2,2,2,1,1,2,1,2,2,1,2,1,2,2,2,1,1,1,2,0,1,2,1,1,2,2,2,2,2,2,0,0,2,2,2,0,0,1,0,1,1,2,2,0,1,1,2,2,2,0,1,1,2,2,1,1,2,2,2,2,1,2,1,0,1,2,0,0,1,1,0,1,1,1,1,1,2,2,0,2,1,1,1,0,2,2,1,2,2,2,2,1,1,2,1,1,2,1,2,1,2,0,1,1,1,1,0,1,1,2,2,2,0,1,2,1,2,0,2,2,0,2,2,1,0,2,1,1,1,1,1,0,2,1,1,2,0,0,2,1,1,2,1,2,2,1,1,2,1,1,2,1,1,2,1,1,1,2,1,1,0,2,1,1,2,1,1,0,1,2,2…	-	-	-	-	-
354	IDP8593	mu	MAGI_95553	chr01	104.6	1.7	Dominant	+/-	ISU Map7	1,1,2,2,2,2,2,1,0,1,1,2,1,2,1,1,2,0,0,2,1,1,2,1,2,1,1,2,2,2,2,2,1,1,0,0,2,2,0,1,1,2,2,2,1,1,1,2,1,2,1,2,2,1,1,1,1,0,0,2,2,1,1,0,1,1,1,1,0,1,2,2,1,1,1,2,0,2,2,1,1,0,2,1,1,2,2,2,2,1,2,1,1,1,2,2,1,1,1,1,2,1,0,1,1,1,2,1,2,0,1,1,2,2,2,1,2,2,0,2,1,1,2,1,0,0,1,1,1,1,1,1,0,1,0,1,1,1,2,0,2,2,1,2,1,2,1,2,2,1,2,0,1,1,2,1,1,0,0,0,1,2,0,1,1,2,1,2,1,0,0,0,2,0,1,1,2,0,1,2,1,1,2,1,1,1,1,1,0,1,1,2,1,2,1,1,1,1,2,2…	MAGIv3.1_51059	MAGIv3.1_51059	chr01	44492985	Consistent
355	IDP112	sk	-	chr01	105.9	0	Co-Dominant	Size	ISU Map7	1,1,0,2,2,2,2,1,0,1,1,1,1,1,1,1,2,0,0,2,1,1,2,0,2,1,1,2,2,2,2,2,1,1,0,0,2,2,0,1,1,2,2,2,1,1,1,2,1,2,1,2,2,1,1,1,1,0,0,2,2,1,1,0,1,1,1,1,0,0,2,2,1,1,1,2,0,2,2,1,1,0,2,1,1,2,2,2,0,1,2,1,1,1,2,2,2,1,1,1,1,1,0,1,1,1,2,1,2,0,2,1,2,2,2,1,2,2,0,2,1,1,2,1,0,0,1,1,1,2,1,1,0,1,0,1,1,1,2,0,2,2,1,2,1,2,1,2,2,1,2,0,1,1,2,1,1,0,0,0,1,0,0,0,2,2,0,2,1,0,0,0,2,0,1,1,2,0,1,2,1,1,2,1,1,1,2,1,0,1,1,2,1,2,1,1,1,1,2,2…	MAGIv3.1_92793	MAGIv3.1_92793	chr01	44192349	Consistent
356	IDP349	mu	IDP112	chr01	105.9	1.3	Dominant	-/+	ISU Map7	1,1,2,2,2,2,2,2,0,1,1,1,1,1,1,1,2,0,0,2,1,1,2,1,2,1,1,2,2,2,2,2,1,1,0,0,2,2,0,1,1,2,2,2,1,1,1,2,1,2,1,2,2,1,1,1,1,0,0,2,2,1,1,0,1,1,1,1,0,1,2,2,1,1,1,2,0,2,2,1,2,0,2,1,1,2,2,2,1,1,2,1,1,1,2,2,1,1,1,1,1,1,0,1,1,1,2,1,2,0,2,1,2,1,2,1,2,1,0,2,1,1,1,1,0,0,1,1,1,1,1,1,0,1,0,1,1,1,2,0,2,2,1,2,2,2,1,2,2,1,2,0,1,1,2,1,1,0,0,0,1,2,0,1,1,2,1,2,1,0,0,0,2,0,1,1,2,0,1,2,1,1,2,1,1,1,2,1,0,0,1,2,1,2,2,1,1,1,2,2…	MEC_87767_P95-Mar06	-	-	-	-
357	gnp_QCC1c05b	mu	IDP112	chr01	105.9	3.5	-	-	Genoplante Map	1,0,0,0,2,0,2,2,0,1,0,1,0,1,1,0,2,0,0,2,1,1,2,1,0,1,1,2,2,2,2,2,1,1,0,0,0,0,0,0,0,0,1,2,0,0,1,2,0,1,1,0,0,1,0,1,1,0,0,0,0,1,1,0,0,0,0,0,1,1,0,2,0,0,0,0,0,0,0,0,0,0,0,0,0,0,0,0,0,0,0,0,0,0,0,0,0,0,0,0,0,0,0,0,0,0,0,0,0,0,0,0,0,0,0,0,0,0,0,0,0,0,0,0,0,0,0,0,0,0,0,0,0,0,0,0,0,0,0,0,0,0,0,0,0,0,0,0,0,0,0,0,0,0,0,0,0,0,0,0,0,0,0,0,0,0,0,0,0,0,0,0,0,0,0,0,0,0,0,0,0,0,0,0,0,0,0,0,0,0,0,0,0,0,0,0,0,0,0,0…	CF028915	CF028915	chr09	133449214	Inconsistent
358	AY110640	mu	IDP112	chr01	105.9	0.9	-	-	MMP	1,0,2,0,2,0,2,2,1,1,1,1,1,1,1,1,2,1,1,2,0,1,2,1,2,1,1,2,2,2,2,2,1,1,2,1,2,2,1,2,1,2,2,2,1,1,1,2,0,2,1,2,2,1,1,1,1,1,1,0,0,1,1,2,0,0,1,0,1,1,2,2,0,0,1,2,2,2,0,1,1,2,2,1,0,0,2,2,2,1,2,1,0,1,2,0,0,1,1,0,1,1,1,1,1,1,2,0,2,1,0,1,0,0,2,1,2,2,2,2,2,1,2,1,0,0,1,2,1,1,0,1,2,0,0,0,0,1,2,2,2,0,1,2,1,2,0,2,2,0,1,2,1,0,2,1,1,1,1,1,0,1,1,1,2,0,0,2,1,0,2,1,2,2,1,0,2,1,1,2,1,1,1,1,1,1,1,2,1,0,2,1,0,0,1,1,0,1,0,2…	BV154162,BV154169,BV154166,BV154167,BV154171,BV154164,BV154168,AY110640,BV154163,BV154172,BV154170,BV154161,BV154165,AI770723	BV154167,BV154163,BV154172,BV154170,BV154161,BV154165	chr01	44506925	Consistent
359	gnp_QAM12h08	mu	IDP112	chr01	105.9	0.5	-	-	Genoplante Map	1,0,0,0,2,0,2,2,0,1,0,1,0,1,1,1,2,0,0,2,1,1,2,1,0,1,1,2,2,2,0,2,0,1,0,0,2,0,0,0,0,0,2,2,0,0,1,2,0,2,1,0,0,0,0,1,1,0,0,0,0,1,1,0,0,0,0,0,1,1,0,2,0,0,0,0,0,0,0,0,0,0,0,0,0,0,0,0,0,0,0,0,0,0,0,0,0,0,0,0,0,0,0,0,0,0,0,0,0,0,0,0,0,0,0,0,0,0,0,0,0,0,0,0,0,0,0,0,0,0,0,0,0,0,0,0,0,0,0,0,0,0,0,0,0,0,0,0,0,0,0,0,0,0,0,0,0,0,0,0,0,0,0,0,0,0,0,0,0,0,0,0,0,0,0,0,0,0,0,0,0,0,0,0,0,0,0,0,0,0,0,0,0,0,0,0,0,0,0,0…	CD983731	CD983731	chr01	45276491	Consistent
360	IDP643	mu	IDP112	chr01	105.9	0.6	Co-Dominant	Size	ISU Map7	1,1,0,2,0,2,2,1,0,0,1,1,1,1,1,1,2,0,0,2,1,1,2,1,2,1,1,2,2,2,2,2,1,1,0,0,2,2,0,1,1,2,2,2,1,1,1,2,1,2,1,2,2,1,1,1,1,0,0,2,2,1,1,0,1,1,2,1,0,1,2,2,1,2,1,2,0,2,2,1,1,0,2,1,1,2,2,2,2,1,2,1,1,1,2,1,2,1,0,1,1,1,0,1,1,1,2,1,2,0,2,1,2,2,2,1,2,2,0,2,1,1,2,1,0,0,1,1,1,1,1,1,0,1,0,1,1,1,2,0,2,2,1,2,1,2,1,2,0,1,2,0,1,1,2,1,1,0,0,0,1,2,0,1,1,2,1,2,1,0,0,0,2,0,1,1,2,0,1,1,1,2,2,1,1,1,2,1,0,1,1,2,1,2,1,1,1,1,1,2…	MAGIv3.1_50907	MAGIv3.1_50907	chr01	46054775	Consistent
361	IDP3865	mu	IDP112	chr01	105.9	0.7	Co-Dominant	Size	ISU Map7	1,1,0,2,2,2,2,1,0,1,1,1,1,1,1,1,2,0,0,2,1,1,2,1,2,1,0,2,2,2,2,2,1,1,0,0,2,2,0,1,1,2,2,2,1,1,1,2,1,2,0,2,2,1,1,1,1,0,0,2,2,1,1,0,1,1,2,1,0,1,2,2,1,2,1,2,0,2,2,1,1,0,2,1,1,2,2,2,2,1,2,1,1,1,2,1,2,1,1,1,1,1,0,1,1,1,2,1,2,0,2,1,2,2,2,1,2,2,0,2,1,1,2,1,0,0,1,1,1,1,1,1,0,1,0,1,1,1,2,0,2,2,1,2,0,2,1,2,2,1,2,0,1,1,2,1,1,0,0,0,1,2,0,1,1,2,1,2,1,0,0,0,2,0,1,1,2,0,1,1,1,2,0,1,1,1,2,1,0,1,1,2,1,2,1,1,1,1,1,2…	MAGIv3.1_101401	-	-	-	-
362	IDP4708	mu	IDP112	chr01	105.9	2.5	Dominant	+/-	ISU Map7	1,1,2,2,2,2,2,1,0,1,1,1,1,1,1,1,2,0,0,2,1,1,2,1,2,1,1,2,2,2,2,2,1,1,0,0,2,2,0,1,1,2,2,2,1,1,1,2,1,2,1,2,2,1,1,1,1,0,0,2,2,1,1,0,1,1,2,1,0,1,2,2,1,2,1,2,0,2,2,1,1,0,2,1,1,2,2,2,2,1,2,1,1,1,2,1,2,1,1,1,1,1,0,1,1,1,2,1,2,0,2,1,2,2,2,1,2,2,0,2,1,1,0,1,0,0,1,1,1,1,1,1,0,1,0,1,1,1,2,0,2,2,1,2,1,2,1,2,2,1,2,0,1,1,2,1,1,0,0,0,1,2,0,1,1,2,1,2,1,0,0,0,2,0,1,1,2,0,1,1,1,2,2,1,1,1,2,1,0,1,1,2,1,2,1,1,1,1,1,2…	MAGIv3.1_84780	MAGIv3.1_84780	chr01	46357007	Consistent
363	bnlg1458	mu	IDP112	chr01	105.9	2.4	-	-	MMP	1,0,2,0,2,0,2,1,1,1,1,1,1,1,1,1,2,1,2,2,1,1,2,1,2,1,1,2,2,2,2,2,1,1,2,2,2,2,1,2,1,2,2,2,1,1,1,2,0,2,1,2,2,1,1,1,1,1,2,0,0,1,1,2,0,0,2,0,1,1,2,2,0,2,1,2,2,2,0,1,1,2,2,1,1,2,2,2,2,1,2,1,0,1,2,0,0,1,1,0,1,1,1,1,1,1,2,0,2,1,2,1,0,2,2,1,2,2,2,2,1,1,2,1,1,2,1,2,1,1,0,1,1,1,1,0,1,1,2,2,2,0,1,2,1,2,0,2,2,0,2,2,1,0,2,1,1,1,1,1,0,1,1,1,2,2,0,2,1,1,1,2,2,2,1,1,2,2,1,1,1,2,2,1,1,1,0,2,1,0,2,0,1,2,1,1,0,1,1,2…	-	-	-	-	-
364	gnp_AI855401a	mu	IDP112	chr01	105.9	1.2	-	-	Genoplante Map	1,0,0,0,2,0,2,2,0,1,0,1,0,1,1,1,2,0,0,2,1,1,2,1,0,1,1,2,2,2,2,2,1,1,0,0,2,0,0,0,0,0,2,2,0,0,1,2,0,2,1,0,0,1,0,1,1,0,0,0,0,1,1,0,0,0,0,0,1,1,0,2,0,0,0,0,0,0,0,0,0,0,0,0,0,0,0,0,0,0,0,0,0,0,0,0,0,0,0,0,0,0,0,0,0,0,0,0,0,0,0,0,0,0,0,0,0,0,0,0,0,0,0,0,0,0,0,0,0,0,0,0,0,0,0,0,0,0,0,0,0,0,0,0,0,0,0,0,0,0,0,0,0,0,0,0,0,0,0,0,0,0,0,0,0,0,0,0,0,0,0,0,0,0,0,0,0,0,0,0,0,0,0,0,0,0,0,0,0,0,0,0,0,0,0,0,0,0,0,0…	AI855401	-	-	-	-
365	lgm0124	mu	IDP112	chr01	105.9	0	-	-	Genoplante Map	1,0,0,0,2,0,2,2,0,1,0,1,0,1,1,1,2,0,0,2,1,1,2,1,0,1,1,2,2,2,2,2,1,1,0,0,2,2,0,0,1,0,2,0,0,1,0,2,0,2,1,0,2,1,0,1,1,0,1,0,0,1,1,0,0,0,0,0,1,1,2,2,0,1,0,0,0,0,0,0,0,0,0,0,0,0,0,0,0,0,0,0,0,0,0,0,0,0,0,0,0,0,0,0,0,0,0,0,0,0,0,0,0,0,0,0,0,0,0,0,0,0,0,0,0,0,0,0,0,0,0,0,0,0,0,0,0,0,0,0,0,0,0,0,0,0,0,0,0,0,0,0,0,0,0,0,0,0,0,0,0,0,0,0,0,0,0,0,0,0,0,0,0,0,0,0,0,0,0,0,0,0,0,0,0,0,0,0,0,0,0,0,0,0,0,0,0,0,0,0…	-	-	-	-	-
366	IDP7989	mu	IDP112	chr01	105.9	0.4	Co-Dominant	Size	ISU Map7	1,1,0,2,2,2,2,1,0,1,1,1,1,1,1,1,2,0,0,2,1,1,2,1,2,1,1,2,2,2,2,2,1,1,0,0,2,2,0,1,1,2,2,2,1,1,1,2,1,2,1,2,0,1,1,1,1,0,0,2,2,1,1,0,1,1,1,1,0,1,2,2,1,2,1,2,0,2,2,1,0,0,2,1,1,2,2,2,2,1,2,1,1,1,2,2,1,1,1,1,2,2,0,2,2,2,2,1,2,0,1,1,2,2,2,1,2,2,0,2,1,1,2,1,0,0,1,1,1,1,1,2,0,1,0,1,1,1,2,0,2,2,1,2,1,2,1,2,2,1,2,0,1,1,2,1,1,0,0,0,1,2,0,1,1,2,1,2,1,0,0,0,2,0,1,1,2,0,1,2,1,2,2,1,1,1,2,1,0,1,1,2,1,2,1,1,1,1,2,2…	MAGIv3.1_32896	MAGIv3.1_32896	chr01	45278709	Consistent
367	TIDP2814	sk	-	chr01	107.2	0	Co-Dominant	TGCE	ISU Map7	1,0,0,0,2,0,2,1,0,1,0,1,0,1,1,1,2,0,0,2,1,1,2,1,0,1,1,2,2,2,2,2,1,1,0,0,2,2,0,0,1,0,2,2,0,1,1,2,0,2,1,0,2,1,0,1,1,0,2,0,0,1,1,0,0,0,0,0,1,1,2,2,0,2,0,0,0,0,0,0,0,0,0,0,0,0,0,0,0,0,0,0,0,0,0,0,0,0,0,0,0,0,0,0,0,0,0,0,0,0,0,0,0,0,0,0,0,0,0,0,0,0,0,0,0,0,0,0,0,0,0,0,0,0,0,0,0,0,0,0,0,0,0,0,0,0,0,0,0,0,0,0,0,0,0,0,0,0,0,0,0,0,0,0,0,0,0,0,0,0,0,0,0,0,0,0,0,0,0,0,0,0,0,0,0,0,0,0,0,0,0,0,0,0,0,0,0,0,0,0…	MEC_41032_P95-Mar06	MEC_41032_P95-Mar06	chr01	46074230	Consistent
368	gnp_QBS7c09	sk	-	chr01	107.2	0	-	-	Genoplante Map	1,0,0,0,2,0,2,1,0,1,0,1,0,1,1,1,2,0,0,2,1,1,2,1,0,1,1,2,2,2,2,2,1,1,0,0,2,0,0,0,0,0,2,2,0,0,1,2,0,2,1,0,0,1,0,1,1,0,0,0,0,1,1,0,0,0,0,0,1,1,0,2,0,0,0,0,0,0,0,0,0,0,0,0,0,0,0,0,0,0,0,0,0,0,0,0,0,0,0,0,0,0,0,0,0,0,0,0,0,0,0,0,0,0,0,0,0,0,0,0,0,0,0,0,0,0,0,0,0,0,0,0,0,0,0,0,0,0,0,0,0,0,0,0,0,0,0,0,0,0,0,0,0,0,0,0,0,0,0,0,0,0,0,0,0,0,0,0,0,0,0,0,0,0,0,0,0,0,0,0,0,0,0,0,0,0,0,0,0,0,0,0,0,0,0,0,0,0,0,0…	CF024634	-	-	-	-
369	umc13	sk	-	chr01	107.2	0	-	-	MMP	1,0,2,0,0,0,2,1,1,1,0,0,1,1,0,1,2,1,2,0,1,1,2,0,2,0,1,2,2,2,2,2,1,1,2,1,2,2,1,0,1,2,2,2,1,1,1,2,0,2,0,0,2,1,1,1,1,0,0,0,0,1,1,2,0,0,0,0,1,1,2,2,0,2,1,2,2,2,0,1,1,2,0,1,0,2,2,2,2,1,0,1,0,1,2,0,0,1,1,0,1,1,1,0,1,1,2,0,0,0,0,1,0,0,2,1,2,2,0,0,1,1,2,1,0,0,1,2,1,1,0,1,1,0,0,0,0,1,0,2,2,0,1,2,1,2,0,2,2,0,2,2,1,0,2,1,1,1,1,1,0,1,1,1,2,0,0,2,1,0,1,1,2,2,0,1,2,1,1,0,1,2,2,1,1,1,0,1,1,0,0,0,1,2,1,1,0,1,1,2…	CC784193,CC832515,CC822552,AF377819,CC784192,CC146023,CC822551	-	-	-	-
370	php20725x	sk	-	chr01	107.2	0	-	-	Genoplante Map	1,0,0,0,2,0,2,1,0,1,0,1,0,1,1,1,2,0,0,2,1,1,2,1,0,1,1,2,2,2,2,2,1,1,0,0,2,0,0,0,0,0,2,2,0,0,1,2,0,2,1,0,0,1,0,1,1,0,0,0,0,0,1,0,0,0,0,0,1,1,0,2,0,0,0,0,0,0,0,0,0,0,0,0,0,0,0,0,0,0,0,0,0,0,0,0,0,0,0,0,0,0,0,0,0,0,0,0,0,0,0,0,0,0,0,0,0,0,0,0,0,0,0,0,0,0,0,0,0,0,0,0,0,0,0,0,0,0,0,0,0,0,0,0,0,0,0,0,0,0,0,0,0,0,0,0,0,0,0,0,0,0,0,0,0,0,0,0,0,0,0,0,0,0,0,0,0,0,0,0,0,0,0,0,0,0,0,0,0,0,0,0,0,0,0,0,0,0,0,0…	-	-	-	-	-
371	AY110632	mu	php20725x	chr01	107.2	6	-	-	MMP	1,0,2,0,2,0,2,1,1,1,1,1,1,1,1,1,1,1,2,2,1,1,2,1,1,1,1,2,2,1,2,2,1,1,0,1,0,2,1,1,1,2,2,1,1,1,1,2,0,2,1,2,2,1,1,1,1,1,1,0,0,1,1,1,0,0,2,0,1,1,2,2,0,2,1,1,2,2,0,1,1,2,2,1,0,2,2,2,2,1,1,1,0,1,1,0,0,1,1,0,1,1,1,1,1,1,2,0,2,1,0,1,0,2,2,1,1,2,2,2,1,1,2,1,0,0,1,0,1,1,0,1,1,0,0,0,0,1,2,2,2,0,1,2,1,2,0,2,2,0,2,2,1,0,2,1,1,1,1,1,0,1,1,1,2,0,0,1,1,1,1,1,2,2,1,1,1,1,1,1,1,1,1,1,1,1,1,1,1,0,2,1,0,0,1,1,0,1,0,1…	BV153609,BV153612,CC786222,BV153604,BV153605,BV153608,CC786221,AC200260,BV153603,CC823946,AY110632,BV153610,BV153607,CC823945,AI855360,BV153611,BV153606,BE640618,BV153602	AY110632,AI855360,BE640618	chr01	46268111	Consistent
372	asg35b	sk	-	chr01	108	0	-	-	MMP	1,0,2,0,2,0,2,1,1,1,1,1,1,0,1,1,2,1,2,2,1,1,2,1,2,1,1,0,0,1,1,2,1,1,2,1,0,2,1,2,1,2,0,0,1,1,1,2,0,2,1,2,2,1,1,1,1,1,2,0,0,1,1,2,0,0,2,0,1,1,2,2,0,2,1,2,2,2,0,1,1,2,2,1,1,2,2,2,2,1,2,1,0,1,1,0,0,1,1,0,2,2,1,2,0,2,1,0,1,2,1,2,0,1,1,1,1,1,2,1,1,1,1,1,1,2,1,2,1,1,0,1,1,1,1,0,1,1,2,2,2,0,1,2,1,2,0,2,2,0,2,2,1,0,2,1,1,1,1,1,0,1,1,1,2,1,0,2,1,1,1,1,2,2,1,1,2,1,1,1,1,2,2,1,1,1,1,1,1,0,2,1,1,2,1,1,0,1,1,2…	-	-	-	-	-
373	TIDP5169	sk	-	chr01	109.9	0	Co-Dominant	TGCE	ISU Map7	1,0,0,0,1,0,2,1,0,1,0,1,0,1,1,1,2,0,0,2,1,1,2,1,0,1,0,2,2,1,2,2,1,1,0,0,2,2,0,0,1,0,2,2,0,1,1,2,0,1,1,0,2,1,0,1,1,0,2,0,0,1,1,0,0,0,0,0,1,1,2,2,0,2,0,0,0,0,0,0,0,0,0,0,0,0,0,0,0,0,0,0,0,0,0,0,0,0,0,0,0,0,0,0,0,0,0,0,0,0,0,0,0,0,0,0,0,0,0,0,0,0,0,0,0,0,0,0,0,0,0,0,0,0,0,0,0,0,0,0,0,0,0,0,0,0,0,0,0,0,0,0,0,0,0,0,0,0,0,0,0,0,0,0,0,0,0,0,0,0,0,0,0,0,0,0,0,0,0,0,0,0,0,0,0,0,0,0,0,0,0,0,0,0,0,0,0,0,0,0…	MAGIv3.1_107268	MAGIv3.1_107268	chr01	47266478	Consistent
374	gnp_QBI6a10c	sk	-	chr01	109.9	0	-	-	Genoplante Map	1,0,0,0,1,0,2,1,0,1,0,1,0,1,1,1,2,0,0,2,1,1,2,1,0,1,1,2,2,1,2,2,1,1,0,0,2,0,0,0,0,0,2,2,0,0,1,2,0,1,1,0,0,1,0,1,1,0,0,0,0,1,1,0,0,0,0,0,0,0,0,2,0,0,0,0,0,0,0,0,0,0,0,0,0,0,0,0,0,0,0,0,0,0,0,0,0,0,0,0,0,0,0,0,0,0,0,0,0,0,0,0,0,0,0,0,0,0,0,0,0,0,0,0,0,0,0,0,0,0,0,0,0,0,0,0,0,0,0,0,0,0,0,0,0,0,0,0,0,0,0,0,0,0,0,0,0,0,0,0,0,0,0,0,0,0,0,0,0,0,0,0,0,0,0,0,0,0,0,0,0,0,0,0,0,0,0,0,0,0,0,0,0,0,0,0,0,0,0,0…	CF007934	-	-	-	-
375	TIDP5278	sk	-	chr01	109.9	0	Co-Dominant	TGCE	ISU Map7	1,0,0,0,1,0,2,1,0,1,0,1,0,1,1,1,2,0,0,2,1,1,2,1,0,1,1,2,2,1,2,2,1,1,0,0,2,2,0,0,1,0,2,2,0,1,1,2,0,1,1,0,2,1,0,1,1,0,2,0,0,1,1,0,0,0,0,0,1,1,2,2,0,2,0,0,0,0,0,0,0,0,0,0,0,0,0,0,0,0,0,0,0,0,0,0,0,0,0,0,0,0,0,0,0,0,0,0,0,0,0,0,0,0,0,0,0,0,0,0,0,0,0,0,0,0,0,0,0,0,0,0,0,0,0,0,0,0,0,0,0,0,0,0,0,0,0,0,0,0,0,0,0,0,0,0,0,0,0,0,0,0,0,0,0,0,0,0,0,0,0,0,0,0,0,0,0,0,0,0,0,0,0,0,0,0,0,0,0,0,0,0,0,0,0,0,0,0,0,0…	MAGIv3.1_52834	-	-	-	-
376	phi001	mu	TIDP5278	chr01	109.9	2.2	-	-	Genoplante Map	1,0,0,0,2,0,2,0,0,0,0,0,0,1,1,1,2,0,0,2,1,1,2,1,0,0,1,2,2,1,2,2,1,1,0,0,2,2,0,0,1,0,2,2,0,1,1,2,0,2,0,0,2,1,0,1,1,0,2,0,0,1,0,0,0,0,0,0,1,0,2,2,0,0,0,0,0,0,0,0,0,0,0,0,0,0,0,0,0,0,0,0,0,0,0,0,0,0,0,0,0,0,0,0,0,0,0,0,0,0,0,0,0,0,0,0,0,0,0,0,0,0,0,0,0,0,0,0,0,0,0,0,0,0,0,0,0,0,0,0,0,0,0,0,0,0,0,0,0,0,0,0,0,0,0,0,0,0,0,0,0,0,0,0,0,0,0,0,0,0,0,0,0,0,0,0,0,0,0,0,0,0,0,0,0,0,0,0,0,0,0,0,0,0,0,0,0,0,0,0…	-	-	-	-	-
377	gnp_AI714610b	mu	TIDP5278	chr01	109.9	0	-	-	Genoplante Map	1,0,0,0,2,0,2,1,0,1,0,1,0,1,1,1,2,0,0,2,1,1,2,1,0,1,1,2,2,1,0,2,0,1,0,0,2,0,0,0,0,0,2,2,0,0,1,2,0,2,1,0,0,0,0,1,1,0,0,0,0,1,1,0,0,0,0,0,1,1,0,2,0,0,0,0,0,0,0,0,0,0,0,0,0,0,0,0,0,0,0,0,0,0,0,0,0,0,0,0,0,0,0,0,0,0,0,0,0,0,0,0,0,0,0,0,0,0,0,0,0,0,0,0,0,0,0,0,0,0,0,0,0,0,0,0,0,0,0,0,0,0,0,0,0,0,0,0,0,0,0,0,0,0,0,0,0,0,0,0,0,0,0,0,0,0,0,0,0,0,0,0,0,0,0,0,0,0,0,0,0,0,0,0,0,0,0,0,0,0,0,0,0,0,0,0,0,0,0,0…	AI714610	AI714610	chr01	221135139	Inconsistent
378	IDP4986	mu	TIDP5278	chr01	109.9	0.7	Dominant	+/-	ISU Map7	1,1,2,2,1,2,2,1,0,1,1,1,1,1,1,1,2,0,0,2,1,1,2,1,2,1,1,2,2,1,2,2,1,1,0,0,2,2,0,2,1,1,2,2,1,2,1,2,1,1,1,2,2,1,1,1,1,0,0,2,1,1,1,0,1,1,2,1,0,1,2,2,1,2,1,2,0,2,1,1,1,0,2,1,1,2,2,2,2,2,2,1,1,1,2,1,2,1,1,1,1,1,0,1,2,1,2,1,2,0,2,1,2,2,2,1,2,1,0,2,1,1,1,1,0,0,1,2,1,1,1,1,0,1,0,1,1,1,2,0,2,2,1,2,1,1,1,2,2,1,2,0,1,1,2,1,1,0,0,0,1,2,0,1,1,2,1,2,1,0,0,0,2,0,1,1,2,0,1,1,1,2,2,1,1,1,1,1,0,1,1,2,1,2,1,1,1,1,1,2…	MAGIv3.1_57152	MAGIv3.1_57152	chr01	47336759	Consistent
379	MAGI_107268	sk	-	chr01	110.6	0	-	SNP	ISU SNP Map	1,1,0,2,1,2,2,1,0,1,1,1,1,1,1,1,2,0,0,2,1,1,2,1,2,1,1,2,2,1,2,2,1,1,0,0,2,2,0,0,1,1,2,2,1,1,1,2,1,1,1,2,2,1,1,1,1,0,0,2,1,1,1,0,1,1,2,0,0,1,2,2,1,2,1,2,0,2,1,1,1,0,2,1,1,2,2,2,2,2,2,1,1,1,2,1,2,1,1,1,1,1,0,1,1,1,2,1,2,0,2,1,2,2,2,1,2,2,0,2,1,1,1,1,0,0,1,2,1,1,1,1,0,1,0,1,1,1,2,0,2,2,1,2,0,1,1,2,2,1,2,0,1,1,2,1,1,0,0,0,1,2,0,1,1,2,1,2,1,0,0,0,2,0,1,1,2,0,1,1,1,2,2,1,1,1,1,1,0,1,1,2,1,2,1,1,1,1,0,2…	MAGIv3.1_107268	MAGIv3.1_107268	chr01	47266478	Consistent
380	IDP6022	mu	MAGI_107268	chr01	110.6	4.1	Dominant	+/-	ISU Map7	1,1,2,2,1,2,2,1,0,1,1,1,1,1,1,1,2,0,0,2,2,1,2,1,2,2,1,1,1,1,2,1,1,1,0,0,2,2,0,1,1,2,2,1,1,1,1,2,1,1,1,2,2,1,1,1,1,0,0,2,1,1,2,0,1,1,2,1,0,1,2,2,1,2,1,2,0,1,1,1,1,0,1,1,1,2,2,2,2,2,2,1,1,2,1,2,1,1,1,1,1,1,0,1,1,1,2,1,2,0,1,2,2,2,2,2,2,2,0,2,1,1,1,1,0,0,1,2,1,1,1,2,0,1,0,1,1,1,2,0,1,2,1,2,1,1,1,2,2,1,2,0,1,1,2,1,1,0,2,2,1,2,0,1,1,2,1,2,1,0,0,0,2,0,1,2,2,0,1,1,1,1,2,1,1,1,1,1,0,2,1,1,1,2,2,1,1,1,1,2…	MAGIv3.1_105203	-	-	-	-
381	MAGI_95367	mu	MAGI_107268	chr01	110.6	1	-	SNP	ISU SNP Map	1,1,0,2,1,1,2,1,0,1,1,1,1,1,1,1,2,0,0,2,2,1,2,1,2,1,1,2,2,2,2,1,1,1,0,0,2,2,0,0,1,1,2,2,1,1,1,2,1,1,1,2,2,1,1,1,1,0,0,2,1,1,1,0,1,1,2,0,0,1,2,2,1,2,1,2,0,2,1,1,1,0,2,1,1,2,2,2,2,2,1,1,1,1,2,1,2,1,2,1,1,1,0,1,1,1,2,2,2,0,1,1,2,2,2,1,2,2,0,2,1,1,1,1,0,0,1,2,1,1,1,2,0,1,0,1,1,1,2,0,2,2,1,1,0,1,1,2,2,1,2,0,1,1,2,1,2,0,0,0,1,2,0,1,1,2,1,2,1,0,0,0,2,0,1,2,2,0,1,1,1,2,2,1,1,1,2,1,0,1,1,2,1,2,1,1,1,1,1,2…	MAGIv3.1_95367	MAGIv3.1_95367	chr01	50992506	Consistent
382	IDP875	mu	MAGI_107268	chr01	110.6	2	Dominant	+/-	ISU Map7	1,1,2,2,1,1,2,1,0,1,1,1,1,1,1,1,2,0,0,2,2,1,2,1,2,1,1,2,2,2,2,1,1,1,0,0,2,2,0,2,1,1,2,2,1,1,1,2,1,1,1,2,2,1,1,1,1,0,0,2,1,1,1,0,1,1,2,1,0,1,2,2,2,2,1,2,0,2,1,1,1,0,2,1,1,2,2,2,2,2,1,1,1,1,2,1,2,1,2,1,1,1,0,1,1,1,2,2,2,0,1,1,2,2,2,1,1,1,0,2,1,1,1,1,0,0,1,2,1,1,1,2,0,1,0,1,1,1,2,0,2,2,1,1,1,1,1,2,2,1,2,0,1,1,2,1,2,0,0,0,1,2,0,1,1,2,1,2,1,0,0,0,2,0,1,2,2,0,2,1,1,2,1,1,1,1,2,1,0,1,1,2,1,2,1,1,1,1,1,2…	MEC_53764_P95-Mar06	MEC_53764_P95-Mar06	chr01	50992177	Consistent
383	IDP5944	mu	MAGI_107268	chr01	110.6	1.5	Dominant	+/-	ISU Map7	1,1,2,2,2,2,2,1,0,1,1,1,1,1,1,1,2,0,0,2,2,1,2,1,2,1,1,2,2,2,2,1,1,1,0,0,2,2,0,2,1,1,2,2,1,1,2,2,1,1,1,2,2,1,1,1,1,0,0,2,1,1,1,0,1,1,2,1,0,1,2,2,1,2,1,2,0,2,1,1,1,0,2,1,1,2,2,2,2,2,2,1,1,1,2,1,2,1,1,1,1,1,0,1,2,1,2,1,2,0,1,1,2,2,2,1,2,2,0,2,1,1,1,1,0,0,1,2,1,1,1,2,0,1,0,1,1,1,2,0,2,2,1,2,1,1,1,2,2,1,2,0,1,1,2,1,2,0,0,0,1,2,0,1,1,1,1,2,1,0,0,0,2,0,1,2,2,0,1,1,1,2,1,1,1,1,2,2,0,1,1,2,1,2,2,1,1,1,1,2…	MAGIv3.1_88128	MAGIv3.1_88128	chr01	49491984	Consistent
384	IDP6912	mu	MAGI_107268	chr01	110.6	0.5	Co-Dominant	Size	ISU Map7	1,1,0,2,1,2,2,1,0,1,1,1,1,1,1,1,2,0,0,2,2,1,2,1,2,1,1,2,2,2,2,1,1,1,0,0,2,2,0,2,2,1,2,2,2,1,1,2,1,1,1,2,2,1,1,1,1,0,0,2,1,1,1,0,1,1,2,1,0,1,2,2,1,2,1,2,0,2,1,2,1,0,2,1,1,2,2,2,2,2,2,1,1,1,2,1,2,1,1,1,1,1,0,1,1,1,2,1,2,0,1,1,2,0,2,1,2,2,0,2,1,1,1,1,0,0,1,2,1,1,1,2,0,1,0,1,1,1,2,0,2,2,1,2,1,1,1,2,2,1,2,0,1,1,2,1,2,0,0,0,2,2,0,0,1,1,1,2,1,0,0,0,2,0,1,2,2,0,1,1,1,2,2,1,1,1,2,1,0,1,0,2,1,2,1,1,1,1,1,2…	MAGIv3.1_1521	MAGIv3.1_1521	chr01	49320373	Consistent
385	IDP4324	mu	MAGI_107268	chr01	110.6	0.8	Co-Dominant	Size	ISU Map7	1,1,0,2,1,2,2,1,0,1,1,1,1,1,1,1,2,0,0,2,2,1,2,1,2,1,1,2,2,2,2,1,1,1,0,0,2,2,0,2,2,1,2,2,2,1,1,2,1,1,1,2,2,1,1,1,1,0,0,2,1,1,1,0,1,1,2,1,0,1,2,2,1,2,1,2,0,2,1,2,1,0,2,1,1,2,2,2,2,2,2,1,1,1,2,1,2,1,1,1,1,1,0,1,1,1,2,1,2,0,2,1,2,2,2,1,2,2,0,2,1,1,1,1,0,0,1,2,1,1,1,2,0,1,0,1,1,1,2,0,2,2,1,2,2,1,1,2,2,1,2,0,1,1,2,1,2,0,0,0,2,2,0,2,1,2,1,2,1,0,0,0,2,0,1,2,2,0,1,1,1,2,0,1,1,1,2,1,0,1,1,2,1,2,0,1,1,1,1,2…	MAGIv3.1_28646	MAGIv3.1_28646	chr01	49896861	Consistent
386	gnp_AI600691c	mu	MAGI_107268	chr01	110.6	0.8	-	-	Genoplante Map	1,0,0,0,1,0,2,1,0,1,0,1,0,1,1,1,2,0,0,2,2,1,2,1,0,1,1,2,1,2,2,1,1,1,0,0,2,0,0,0,0,0,2,2,0,0,1,2,0,1,1,0,0,1,0,1,1,0,0,0,0,1,1,0,0,0,0,0,1,1,0,2,0,0,0,0,0,0,0,0,0,0,0,0,0,0,0,0,0,0,0,0,0,0,0,0,0,0,0,0,0,0,0,0,0,0,0,0,0,0,0,0,0,0,0,0,0,0,0,0,0,0,0,0,0,0,0,0,0,0,0,0,0,0,0,0,0,0,0,0,0,0,0,0,0,0,0,0,0,0,0,0,0,0,0,0,0,0,0,0,0,0,0,0,0,0,0,0,0,0,0,0,0,0,0,0,0,0,0,0,0,0,0,0,0,0,0,0,0,0,0,0,0,0,0,0,0,0,0,0…	AI600691	AI600691	chr01	49345618	Consistent
387	ndp2	sk	-	chr01	113.2	0	-	-	MMP	1,0,2,0,1,0,2,1,1,1,1,1,1,1,1,1,2,1,2,2,2,1,2,1,2,1,1,2,2,2,2,1,1,1,2,1,2,2,1,2,1,1,2,2,1,1,1,2,0,1,1,2,0,1,1,1,1,1,2,0,0,1,1,2,0,0,2,0,1,1,2,2,0,2,1,2,2,2,0,1,1,2,2,1,1,2,2,2,2,2,2,1,0,1,2,0,0,1,1,0,1,0,0,0,1,1,2,0,2,1,1,1,0,2,2,1,2,2,2,2,1,1,1,1,1,2,1,2,1,1,0,2,1,1,1,0,1,1,2,2,2,0,1,2,1,1,0,2,2,0,2,2,1,0,0,0,0,1,1,1,0,1,2,1,2,2,0,2,1,1,1,1,2,2,1,2,2,1,1,1,1,2,2,1,1,1,1,1,1,0,2,1,1,2,1,1,0,1,1,2…	-	-	-	-	-
388	TIDP5405	mu	ndp2	chr01	113.2	0.4	Co-Dominant	TGCE	ISU Map7	1,0,0,0,1,0,2,1,0,1,0,1,0,1,1,0,2,0,0,2,2,1,2,1,0,1,1,2,2,2,2,1,1,1,0,0,2,2,0,0,1,0,2,2,0,1,1,2,0,1,1,0,0,1,0,1,1,0,2,0,0,1,1,0,0,0,0,0,1,1,2,2,0,2,0,0,0,0,0,0,0,0,0,0,0,0,0,0,0,0,0,0,0,0,0,0,0,0,0,0,0,0,0,0,0,0,0,0,0,0,0,0,0,0,0,0,0,0,0,0,0,0,0,0,0,0,0,0,0,0,0,0,0,0,0,0,0,0,0,0,0,0,0,0,0,0,0,0,0,0,0,0,0,0,0,0,0,0,0,0,0,0,0,0,0,0,0,0,0,0,0,0,0,0,0,0,0,0,0,0,0,0,0,0,0,0,0,0,0,0,0,0,0,0,0,0,0,0,0,0…	MAGIv3.1_61646	MAGIv3.1_61646	chr01	49897806	Consistent
389	TIDP5539	mu	ndp2	chr01	113.2	0	Co-Dominant	TGCE	ISU Map7	1,0,0,0,1,0,2,1,0,1,0,1,0,1,1,1,2,0,0,2,2,1,2,1,0,1,1,2,2,2,2,1,1,1,0,0,2,2,0,0,1,0,2,2,0,1,1,2,0,1,1,0,2,1,0,1,1,0,2,0,0,1,1,0,0,0,0,0,1,1,2,2,0,2,0,0,0,0,0,0,0,0,0,0,0,0,0,0,0,0,0,0,0,0,0,0,0,0,0,0,0,0,0,0,0,0,0,0,0,0,0,0,0,0,0,0,0,0,0,0,0,0,0,0,0,0,0,0,0,0,0,0,0,0,0,0,0,0,0,0,0,0,0,0,0,0,0,0,0,0,0,0,0,0,0,0,0,0,0,0,0,0,0,0,0,0,0,0,0,0,0,0,0,0,0,0,0,0,0,0,0,0,0,0,0,0,0,0,0,0,0,0,0,0,0,0,0,0,0,0…	MAGIv3.1_43869	MAGIv3.1_43869	chr01	50199843	Consistent
390	TIDP5624	mu	ndp2	chr01	113.2	3.3	Co-Dominant	TGCE	ISU Map7	1,0,0,0,1,0,2,1,0,1,0,1,0,1,1,1,2,0,0,2,2,1,2,1,0,1,1,2,2,2,2,1,1,1,0,0,2,2,0,0,2,0,2,2,0,1,1,2,0,1,1,0,2,1,0,1,1,0,2,0,0,1,1,0,0,0,0,0,0,1,2,2,0,2,0,0,0,0,0,0,0,0,0,0,0,0,0,0,0,0,0,0,0,0,0,0,0,0,0,0,0,0,0,0,0,0,0,0,0,0,0,0,0,0,0,0,0,0,0,0,0,0,0,0,0,0,0,0,0,0,0,0,0,0,0,0,0,0,0,0,0,0,0,0,0,0,0,0,0,0,0,0,0,0,0,0,0,0,0,0,0,0,0,0,0,0,0,0,0,0,0,0,0,0,0,0,0,0,0,0,0,0,0,0,0,0,0,0,0,0,0,0,0,0,0,0,0,0,0,0…	MAGIv3.1_28646	MAGIv3.1_28646	chr01	49896861	Consistent
391	mmp23	sk	-	chr01	115.2	0	-	-	MMP	1,0,2,0,1,0,2,2,1,2,1,2,0,1,1,1,2,1,2,2,2,1,2,1,2,2,1,2,2,0,2,2,1,1,2,1,2,2,0,2,1,0,2,2,0,1,1,2,0,1,1,0,2,0,0,1,0,1,2,0,0,1,1,2,0,0,2,0,1,1,2,2,0,2,1,2,2,2,0,1,2,2,2,1,1,0,2,2,2,2,1,1,0,1,2,0,0,1,1,0,1,1,1,0,1,1,2,0,2,1,2,1,0,0,2,1,0,0,2,0,1,1,1,1,1,2,1,2,1,1,0,2,1,1,1,0,1,1,2,2,2,0,1,1,1,1,0,2,2,0,2,2,1,0,2,1,2,1,1,1,0,1,2,1,2,0,0,2,1,1,1,1,2,2,1,2,2,1,1,1,1,2,2,1,1,1,1,1,1,0,2,1,1,2,1,1,0,1,1,1…	AZ916075,AZ916074	AZ916074	chr01	51435086	Consistent
392	AW400087	sk	-	chr01	116.2	0	-	-	MMP	1,0,2,0,1,0,2,2,0,2,0,2,0,1,1,1,2,1,2,2,2,1,2,1,0,2,1,2,2,0,2,0,1,1,2,1,2,2,0,2,2,1,2,2,2,0,1,2,0,1,1,0,2,0,0,1,0,1,0,0,0,1,1,2,0,0,2,0,0,1,2,2,0,2,1,2,2,2,0,2,1,2,2,1,0,0,2,2,2,2,1,1,0,1,2,0,0,1,1,0,1,1,1,1,1,1,2,0,2,1,0,1,0,2,2,1,2,2,0,2,1,1,1,1,0,0,1,2,1,1,0,2,1,0,0,0,0,1,2,2,2,0,0,1,1,1,0,2,2,0,2,2,1,0,2,1,2,1,1,1,0,1,2,2,2,0,0,2,1,1,1,1,2,2,1,2,2,1,1,1,1,2,2,1,1,1,1,1,1,0,2,1,0,0,1,1,0,1,0,1…	CC833256,AC194260,CC747994,CC747995,AW400087,CC833257	-	-	-	-
393	AY110393	mu	AW400087	chr01	116.2	4.6	-	-	MMP	1,0,2,0,1,0,2,2,1,2,0,2,1,1,1,1,2,1,1,2,2,1,2,1,2,2,1,1,2,2,2,1,1,1,2,0,2,2,1,2,2,1,2,2,2,1,1,2,0,1,1,2,2,1,1,0,1,1,0,0,0,1,0,0,0,0,2,0,1,1,2,2,0,2,1,2,2,2,0,2,1,2,2,1,0,2,2,2,2,2,1,1,0,1,0,0,0,1,1,0,1,1,1,1,1,1,1,0,2,1,0,1,0,2,1,1,0,1,2,2,1,1,1,1,0,0,1,2,1,1,0,1,1,0,0,0,0,1,2,2,2,0,1,1,1,1,0,1,2,0,1,0,1,0,0,1,0,1,1,1,0,0,2,0,2,0,0,1,1,1,1,1,2,2,1,1,1,1,1,1,1,2,2,0,1,1,1,1,1,0,1,1,0,0,1,1,0,1,0,1…	AI391845,BV153204,AI438512,BV153209,AI438525,CC834638,AI737875,AC194260,AI391808,AI855395,AI391858,BV153205,BV153202,BV153208,AI622193,BV153203,AI621692,BV153201,AI391869,CC747994,BE012137,AI621681,AI391860,BV153207,CC747995,BV153212,BV153206,AI391831,AI621668,CC833257,AI438535,AY110393,BV153210,AI621657,CC834639,BV153211,CC833256	AI391845,AI438512,AI438525,AI737875,AI391808,AI855395,AI391858,AI622193,AI621692,AI391869,BE012137,AI621681,AI391860,AI391831,AI621668,AI438535,AY110393,AI621657	chr01	51407453	Consistent
394	gnp_AI737875	mu	AW400087	chr01	116.2	1.3	-	-	Genoplante Map	1,0,0,0,1,0,2,2,0,2,0,2,0,1,1,1,2,0,0,2,2,1,2,1,0,2,1,2,2,2,2,1,1,1,0,0,2,0,0,0,0,0,2,2,0,0,1,2,0,1,1,0,0,1,0,1,1,0,0,0,0,1,1,0,0,0,0,0,1,1,0,2,0,0,0,0,0,0,0,0,0,0,0,0,0,0,0,0,0,0,0,0,0,0,0,0,0,0,0,0,0,0,0,0,0,0,0,0,0,0,0,0,0,0,0,0,0,0,0,0,0,0,0,0,0,0,0,0,0,0,0,0,0,0,0,0,0,0,0,0,0,0,0,0,0,0,0,0,0,0,0,0,0,0,0,0,0,0,0,0,0,0,0,0,0,0,0,0,0,0,0,0,0,0,0,0,0,0,0,0,0,0,0,0,0,0,0,0,0,0,0,0,0,0,0,0,0,0,0,0…	AI737875	AI737875	chr01	51407631	Consistent
395	ndp1	sk	-	chr01	117.6	0	-	-	MMP	1,0,2,0,1,0,2,2,1,2,1,2,1,1,1,1,2,1,2,1,2,1,2,1,2,2,1,2,2,2,2,2,1,1,2,1,2,2,1,2,1,1,2,2,1,1,1,2,0,1,1,2,2,1,1,1,1,1,2,0,0,1,1,2,0,0,2,0,1,1,2,2,0,2,1,2,2,2,0,1,1,2,2,1,1,2,2,2,2,2,1,1,0,1,2,0,0,1,1,0,1,1,1,1,1,1,2,0,2,1,2,1,0,2,2,1,2,2,2,2,1,1,1,0,1,2,1,2,1,1,0,2,1,1,1,0,1,1,2,2,2,0,1,1,1,1,0,2,2,0,2,2,1,0,2,1,2,1,2,1,0,1,2,1,2,0,0,2,1,1,0,1,2,2,1,0,2,1,1,1,1,2,2,1,1,1,1,1,2,0,2,1,1,2,1,1,0,1,1,1…	AC200560	-	-	-	-
396	umc1880	sk	-	chr01	118.4	0	-	-	MMP	1,0,2,0,1,0,2,2,1,2,1,2,1,1,1,1,2,1,2,1,2,1,2,1,2,2,1,2,1,2,2,2,1,1,0,1,2,2,0,1,0,1,0,0,1,1,1,2,0,1,1,2,2,1,1,1,1,1,0,0,0,1,1,2,0,0,2,0,1,1,2,2,0,2,1,2,2,2,0,1,1,2,2,1,1,2,2,2,2,2,1,1,0,1,2,0,0,1,1,0,1,1,1,1,1,1,2,0,2,1,2,1,0,2,2,1,2,2,2,2,1,1,1,2,1,2,1,2,1,1,0,2,1,1,1,0,1,1,2,2,2,0,1,1,1,1,0,2,2,0,2,2,1,0,2,1,2,1,2,1,0,1,1,1,2,2,0,2,1,1,1,1,2,1,1,2,2,1,1,1,1,2,2,1,1,1,1,1,2,0,2,1,1,2,1,1,0,1,1,1…	CC789465,CC750630,CC753900,G68043	CC753900	chr01	51625627	Consistent
397	bnlg1866	mu	umc1880	chr01	118.4	0.7	-	-	MMP	1,0,2,0,1,0,2,2,1,2,1,2,1,1,1,1,2,1,2,1,2,1,2,1,2,2,1,2,1,2,2,2,1,1,2,1,0,2,1,1,0,1,2,2,1,1,1,2,0,1,1,2,2,1,1,1,1,1,2,0,0,1,1,2,0,0,2,0,1,1,2,2,0,2,1,2,2,2,0,1,1,2,2,1,1,2,2,2,2,2,1,1,0,1,2,0,0,1,1,0,1,1,1,1,1,1,2,0,2,1,2,1,0,2,2,1,2,2,2,2,1,1,1,2,1,2,1,2,1,1,0,2,1,1,1,0,1,1,2,2,2,0,1,1,1,1,0,2,2,0,2,2,1,0,2,1,2,1,2,1,0,0,1,0,2,0,0,2,1,1,1,1,2,1,1,2,2,1,1,1,1,2,2,1,1,1,1,1,2,0,2,1,0,2,1,1,0,1,1,1…	CC753900,CC789465,CC750630	CC753900	chr01	51625627	Consistent
398	fphi109275	mu	umc1880	chr01	118.4	0.7	-	-	Genoplante Map	1,0,0,0,1,0,2,2,0,2,0,2,0,1,1,1,2,0,0,1,2,1,2,1,0,2,1,2,1,2,2,0,1,1,0,0,2,2,0,0,0,0,2,2,0,0,1,2,0,1,1,0,2,1,0,1,1,0,0,0,0,1,1,0,0,0,0,0,1,1,2,2,0,2,0,0,0,0,0,0,0,0,0,0,0,0,0,0,0,0,0,0,0,0,0,0,0,0,0,0,0,0,0,0,0,0,0,0,0,0,0,0,0,0,0,0,0,0,0,0,0,0,0,0,0,0,0,0,0,0,0,0,0,0,0,0,0,0,0,0,0,0,0,0,0,0,0,0,0,0,0,0,0,0,0,0,0,0,0,0,0,0,0,0,0,0,0,0,0,0,0,0,0,0,0,0,0,0,0,0,0,0,0,0,0,0,0,0,0,0,0,0,0,0,0,0,0,0,0,0…	CC750534,CC786103,CC786102,CC750535	-	-	-	-
399	bnlg182	mu	umc1880	chr01	118.4	0	-	-	Genoplante Map	1,0,0,0,1,0,2,2,0,2,0,2,0,1,1,1,2,0,0,1,2,1,2,1,0,2,1,2,1,2,2,2,1,1,0,0,2,2,0,0,1,0,2,2,0,1,1,2,0,1,1,0,2,1,0,1,1,0,2,0,0,1,1,0,0,0,0,0,1,1,2,2,0,2,0,0,0,0,0,0,0,0,0,0,0,0,0,0,0,0,0,0,0,0,0,0,0,0,0,0,0,0,0,0,0,0,0,0,0,0,0,0,0,0,0,0,0,0,0,0,0,0,0,0,0,0,0,0,0,0,0,0,0,0,0,0,0,0,0,0,0,0,0,0,0,0,0,0,0,0,0,0,0,0,0,0,0,0,0,0,0,0,0,0,0,0,0,0,0,0,0,0,0,0,0,0,0,0,0,0,0,0,0,0,0,0,0,0,0,0,0,0,0,0,0,0,0,0,0,0…	CC753900,CC789465,CC750630	CC753900	chr01	51625627	Consistent
400	phi109275	mu	umc1880	chr01	118.4	0	-	-	MMP	1,0,2,0,1,0,2,2,1,2,0,2,1,1,1,1,2,1,2,1,2,1,2,1,2,2,1,2,1,2,2,1,1,1,2,1,2,2,0,0,0,1,2,2,1,1,1,2,0,1,1,2,2,1,1,1,1,1,2,0,0,1,1,2,0,0,0,0,1,1,2,2,0,0,1,2,2,2,0,0,1,2,2,0,0,2,2,2,2,2,1,1,0,0,2,0,0,1,1,0,0,1,0,1,1,1,2,0,2,1,0,1,0,2,2,1,2,2,2,2,1,1,1,2,0,0,1,2,1,1,0,2,1,0,0,0,0,0,0,2,2,0,1,1,1,1,0,2,2,0,2,2,1,0,2,1,2,1,2,1,0,1,1,0,0,0,0,2,1,1,1,1,2,1,0,2,2,1,1,1,1,2,2,1,1,1,0,1,2,0,0,0,1,2,1,1,0,1,1,1…	CC750534,CC786103,CC786102,CC750535	-	-	-	-
401	TIDP6428	mu	umc1880	chr01	118.4	0.7	Co-Dominant	TGCE	ISU Map7	0,0,0,0,1,0,2,2,0,2,0,2,0,1,1,1,2,0,0,1,2,1,2,1,0,2,0,2,1,2,2,2,0,1,0,0,2,2,0,0,1,0,2,2,0,1,1,2,0,1,1,0,2,1,0,1,0,0,2,0,0,1,1,0,0,0,0,0,1,1,2,2,0,2,0,0,0,0,0,0,0,0,0,0,0,0,0,0,0,0,0,0,0,0,0,0,0,0,0,0,0,0,0,0,0,0,0,0,0,0,0,0,0,0,0,0,0,0,0,0,0,0,0,0,0,0,0,0,0,0,0,0,0,0,0,0,0,0,0,0,0,0,0,0,0,0,0,0,0,0,0,0,0,0,0,0,0,0,0,0,0,0,0,0,0,0,0,0,0,0,0,0,0,0,0,0,0,0,0,0,0,0,0,0,0,0,0,0,0,0,0,0,0,0,0,0,0,0,0,0…	MAGIv3.1_36249	MAGIv3.1_36249	chr01	51839105	Consistent
402	fbnlg1866	sk	-	chr01	118.7	0	-	-	Genoplante Map	0,0,0,0,1,0,2,2,0,2,0,2,0,1,1,1,2,0,0,0,2,1,2,1,0,2,1,0,1,0,2,0,1,1,0,0,2,0,0,0,0,0,2,2,0,0,1,2,0,1,1,0,0,1,0,1,1,0,0,0,0,1,1,0,0,0,0,0,1,1,2,2,0,2,0,0,0,0,0,0,0,0,0,0,0,0,0,0,0,0,0,0,0,0,0,0,0,0,0,0,0,0,0,0,0,0,0,0,0,0,0,0,0,0,0,0,0,0,0,0,0,0,0,0,0,0,0,0,0,0,0,0,0,0,0,0,0,0,0,0,0,0,0,0,0,0,0,0,0,0,0,0,0,0,0,0,0,0,0,0,0,0,0,0,0,0,0,0,0,0,0,0,0,0,0,0,0,0,0,0,0,0,0,0,0,0,0,0,0,0,0,0,0,0,0,0,0,0,0,0…	CC753900,CC789465,CC750630	CC753900	chr01	51625627	Consistent
403	umc1598	sk	-	chr01	118.7	0	-	-	MMP	1,0,2,0,1,0,2,2,1,2,1,2,1,1,1,1,2,1,2,1,2,1,2,1,2,2,1,2,1,2,2,0,1,1,2,1,2,2,1,1,1,1,2,2,1,1,1,2,0,1,1,2,2,1,1,1,1,1,2,0,0,1,1,2,0,0,2,0,1,1,2,2,0,2,1,2,2,2,0,1,1,2,2,1,1,2,2,2,2,2,1,1,0,1,1,0,0,1,1,0,1,0,1,1,1,1,2,0,2,1,2,1,0,2,2,1,2,2,2,2,1,1,1,2,1,2,1,2,1,1,0,2,1,1,1,0,1,1,2,2,2,0,1,1,1,1,0,2,2,0,2,2,1,0,2,1,2,1,2,1,0,1,1,1,2,0,0,0,1,1,1,1,2,1,1,2,2,1,1,1,1,2,2,1,1,1,1,1,2,0,2,1,1,2,1,1,0,1,1,1…	-	-	-	-	-
404	lim432	sk	-	chr01	119.7	0	-	-	MMP	1,0,2,0,1,0,1,2,1,2,1,2,1,1,1,1,2,1,2,1,2,1,2,1,1,2,2,2,1,2,2,0,1,1,2,1,2,2,1,1,1,1,2,2,1,1,1,2,0,1,1,2,2,1,0,1,1,1,2,0,0,1,1,2,0,0,2,0,1,1,2,2,0,2,1,2,2,2,0,1,1,2,2,2,1,2,2,2,2,2,1,1,0,1,1,0,0,1,1,0,1,1,1,1,1,1,2,0,2,1,2,1,0,2,2,1,2,2,2,1,1,1,1,2,1,2,1,2,1,1,0,2,1,1,1,0,1,1,2,2,2,0,1,1,1,1,0,2,2,0,2,2,1,0,2,1,2,1,2,0,0,1,2,1,2,0,0,2,1,1,1,1,2,1,1,2,2,1,1,1,1,2,2,1,1,1,1,1,2,0,2,1,1,2,1,1,0,1,1,1…	-	-	-	-	-
405	TIDP3188	mu	lim432	chr01	119.7	2.8	Co-Dominant	TGCE	ISU Map7	1,0,0,0,1,0,1,2,0,2,0,2,0,1,1,1,2,0,0,1,2,1,2,1,0,2,2,2,1,2,2,2,1,1,0,0,2,2,0,0,0,0,2,2,0,1,1,2,0,1,1,0,2,1,0,1,1,0,2,0,0,1,1,0,0,0,0,0,1,1,2,2,0,2,0,0,0,0,0,0,0,0,0,0,0,0,0,0,0,0,0,0,0,0,0,0,0,0,0,0,0,0,0,0,0,0,0,0,0,0,0,0,0,0,0,0,0,0,0,0,0,0,0,0,0,0,0,0,0,0,0,0,0,0,0,0,0,0,0,0,0,0,0,0,0,0,0,0,0,0,0,0,0,0,0,0,0,0,0,0,0,0,0,0,0,0,0,0,0,0,0,0,0,0,0,0,0,0,0,0,0,0,0,0,0,0,0,0,0,0,0,0,0,0,0,0,0,0,0,0…	MEC_75004_P95-Mar06	MEC_75004_P95-Mar06	chr01	53263276	Consistent
406	TIDP3553	mu	lim432	chr01	119.7	0	Co-Dominant	TGCE	ISU Map7	1,0,0,0,1,0,1,2,0,2,0,2,0,1,0,1,2,0,0,1,2,1,2,1,0,2,2,2,1,2,0,2,1,1,0,0,2,2,0,0,0,0,2,2,0,1,1,2,0,1,1,0,2,1,0,1,1,0,0,0,0,1,1,0,0,0,0,0,1,1,2,2,0,2,0,0,0,0,0,0,0,0,0,0,0,0,0,0,0,0,0,0,0,0,0,0,0,0,0,0,0,0,0,0,0,0,0,0,0,0,0,0,0,0,0,0,0,0,0,0,0,0,0,0,0,0,0,0,0,0,0,0,0,0,0,0,0,0,0,0,0,0,0,0,0,0,0,0,0,0,0,0,0,0,0,0,0,0,0,0,0,0,0,0,0,0,0,0,0,0,0,0,0,0,0,0,0,0,0,0,0,0,0,0,0,0,0,0,0,0,0,0,0,0,0,0,0,0,0,0…	MAGIv3.1_83529	-	-	-	-
407	TIDP5648	mu	lim432	chr01	119.7	0	Co-Dominant	TGCE	ISU Map7	1,0,0,0,1,0,1,2,0,2,0,2,0,1,1,1,2,0,0,1,2,1,2,1,0,2,2,2,1,2,2,2,1,1,0,0,2,2,0,0,1,0,2,2,0,1,1,2,0,1,1,0,2,1,0,1,1,0,2,0,0,1,1,0,0,0,0,0,1,1,2,2,0,2,0,0,0,0,0,0,0,0,0,0,0,0,0,0,0,0,0,0,0,0,0,0,0,0,0,0,0,0,0,0,0,0,0,0,0,0,0,0,0,0,0,0,0,0,0,0,0,0,0,0,0,0,0,0,0,0,0,0,0,0,0,0,0,0,0,0,0,0,0,0,0,0,0,0,0,0,0,0,0,0,0,0,0,0,0,0,0,0,0,0,0,0,0,0,0,0,0,0,0,0,0,0,0,0,0,0,0,0,0,0,0,0,0,0,0,0,0,0,0,0,0,0,0,0,0,0…	MAGIv3.1_50972	-	-	-	-
408	TIDP4672	mu	lim432	chr01	119.7	0	Co-Dominant	TGCE	ISU Map7	1,0,0,0,1,0,1,2,0,2,0,2,0,1,1,1,2,0,0,1,2,1,2,1,0,2,2,2,1,2,0,2,1,1,0,0,2,2,0,0,1,0,2,2,0,1,1,2,0,1,1,0,2,1,0,1,1,0,2,0,0,1,1,0,0,0,0,0,1,1,2,2,0,2,0,0,0,0,0,0,0,0,0,0,0,0,0,0,0,0,0,0,0,0,0,0,0,0,0,0,0,0,0,0,0,0,0,0,0,0,0,0,0,0,0,0,0,0,0,0,0,0,0,0,0,0,0,0,0,0,0,0,0,0,0,0,0,0,0,0,0,0,0,0,0,0,0,0,0,0,0,0,0,0,0,0,0,0,0,0,0,0,0,0,0,0,0,0,0,0,0,0,0,0,0,0,0,0,0,0,0,0,0,0,0,0,0,0,0,0,0,0,0,0,0,0,0,0,0,0…	MAGIv3.1_50972	-	-	-	-
409	mmp151a	mu	lim432	chr01	119.7	2.3	-	-	MMP	1,0,2,0,1,0,1,2,0,2,1,2,0,1,1,1,2,1,2,1,2,1,2,1,0,2,2,2,1,2,2,2,1,1,2,1,2,2,2,1,2,1,2,2,1,1,1,2,0,1,1,2,2,2,1,1,2,1,2,0,0,1,1,2,0,0,1,0,1,1,2,2,0,1,1,2,2,2,0,2,1,1,2,2,1,0,2,2,2,2,1,1,0,1,1,0,0,1,1,0,1,1,1,0,1,1,2,0,2,1,2,0,0,2,0,1,1,0,1,2,1,1,0,1,2,0,1,2,1,1,0,2,1,1,1,0,1,1,2,2,2,0,2,2,1,1,0,2,2,0,2,2,1,0,2,1,2,1,2,2,0,1,2,2,2,1,0,2,1,1,1,1,2,1,1,2,2,1,1,1,1,2,2,1,1,1,1,1,2,0,2,1,1,1,1,1,0,1,1,1…	AZ916370	AZ916370	chr09	128874168	Inconsistent
410	bnl12.06a	sk	-	chr01	120.1	0	-	-	MMP	1,0,2,0,0,0,1,2,1,2,0,0,1,1,1,1,2,1,2,0,2,1,2,1,1,2,1,2,1,2,2,0,1,1,2,1,2,2,1,0,2,1,2,2,0,1,1,2,0,1,0,2,2,1,1,1,1,1,2,0,0,1,1,2,0,0,0,0,1,1,2,2,0,2,1,2,2,2,0,2,1,2,2,2,0,2,2,2,2,2,1,1,0,1,1,0,0,1,1,0,0,1,1,0,1,1,2,0,0,0,0,1,0,0,2,1,2,2,0,0,1,1,1,2,0,0,1,0,1,1,0,2,1,0,0,0,0,1,0,2,2,0,1,1,1,1,0,2,2,0,2,2,1,0,2,1,2,1,2,1,0,1,2,0,2,0,0,2,1,0,1,1,2,1,0,2,2,1,1,0,1,2,2,1,1,1,0,1,2,0,0,0,1,2,1,1,0,1,1,1…	-	-	-	-	-
411	IDP7959	mu	bnl12.06a	chr01	120.1	2.9	Dominant	+/-	ISU Map7	1,1,2,2,1,1,2,1,0,2,1,2,1,1,1,1,2,0,0,1,2,1,2,1,2,2,1,2,1,2,2,1,1,1,0,0,2,2,0,1,2,1,2,2,1,1,1,2,1,1,2,2,2,1,1,1,1,0,0,2,1,1,1,0,1,1,2,1,0,1,2,2,1,2,1,2,0,2,1,2,1,0,2,1,1,2,2,2,2,2,1,1,1,1,1,1,1,1,1,1,1,1,0,1,1,1,2,2,2,0,2,1,2,2,2,1,2,2,0,2,1,1,1,2,0,0,1,2,1,1,1,2,0,2,0,1,1,1,2,0,2,2,1,1,1,1,1,2,2,1,2,0,1,2,2,1,2,0,2,2,2,1,0,2,1,2,1,2,1,0,0,0,2,0,1,2,2,0,1,1,1,2,2,1,1,1,2,1,0,1,1,2,1,2,1,1,1,1,1,1…	MAGIv3.1_25788	-	-	-	-
412	IDP8997	sk	-	chr01	121.2	0	Dominant	+/-	ISU Map7	1,1,0,2,1,1,1,1,0,2,1,2,1,1,1,1,2,0,0,1,2,1,2,0,1,2,1,2,1,2,2,1,1,1,0,0,2,2,0,1,2,1,2,2,1,1,1,2,1,1,1,2,2,1,1,1,1,0,0,2,1,1,1,0,1,1,2,1,0,1,2,2,1,2,1,2,0,2,1,2,1,0,2,2,1,2,2,2,2,2,1,1,1,1,1,1,1,1,1,1,1,1,0,1,1,1,2,2,2,0,2,1,2,2,2,1,2,2,0,1,1,1,1,2,0,0,1,2,1,1,1,2,0,1,0,1,1,1,2,0,2,2,1,1,1,1,1,2,2,1,2,0,1,1,2,1,2,0,0,0,2,2,0,2,1,2,1,2,1,0,0,0,2,0,1,2,2,0,1,1,1,2,2,1,1,1,2,1,0,1,1,2,0,2,2,1,2,1,1,1…	MAGIv4.0_35039	MAGIv4.0_35039	chr09	110624795	Inconsistent
413	IDP7785	mu	IDP8997	chr01	121.2	1.5	Co-Dominant	Size	ISU Map7	1,1,0,2,1,1,1,0,0,2,1,2,1,1,1,1,2,0,0,1,2,1,2,1,1,2,1,2,1,2,2,1,1,1,0,0,2,2,0,1,2,1,2,2,1,1,1,2,1,1,0,2,2,1,1,1,1,0,0,2,1,1,1,0,1,1,2,1,0,1,2,2,1,2,1,2,0,2,1,2,1,0,2,2,1,2,2,2,2,2,1,1,1,1,1,1,1,1,1,1,1,1,0,1,1,1,2,2,2,0,2,1,2,2,2,1,2,2,0,1,1,1,1,2,0,0,1,2,1,1,1,2,0,2,0,1,1,1,2,0,2,2,1,1,0,1,1,2,2,1,2,0,1,1,2,1,2,0,0,0,2,2,0,2,1,2,1,2,1,0,0,0,2,0,1,2,2,0,1,1,1,2,2,1,0,1,2,1,0,1,1,2,1,2,1,1,1,1,1,1…	MAGIv3.1_1256	MAGIv3.1_1256	chr01	52855988	Consistent
414	IDP4441	sk	-	chr01	122	0	Dominant	+/-	ISU Map7	1,1,0,2,1,1,1,1,0,2,1,2,1,1,1,1,2,0,0,1,2,1,2,1,1,2,1,2,1,2,2,1,1,1,0,0,2,2,0,1,2,1,2,2,1,1,1,1,1,1,1,2,2,1,1,1,1,0,0,2,1,1,1,0,1,1,2,1,0,1,2,2,1,2,1,2,0,2,1,2,1,0,2,2,1,2,2,2,2,2,1,1,1,1,1,1,1,1,1,1,1,1,0,1,1,1,2,2,2,0,2,1,2,2,2,1,2,2,0,1,1,1,1,2,0,0,1,2,1,1,1,2,0,2,0,1,1,1,2,0,2,2,1,1,1,1,1,2,2,1,2,0,1,1,2,1,2,0,2,2,2,2,0,2,1,2,1,2,1,0,0,0,2,0,1,2,2,0,1,1,1,2,2,1,1,1,2,1,0,1,1,2,1,2,1,1,1,1,1,1…	MAGIv3.1_19434	-	-	-	-
415	IDP7537	sk	-	chr01	124.4	0	Dominant	+/-	ISU Map7	1,1,2,2,1,1,1,1,0,2,1,2,1,1,1,1,2,0,0,1,2,1,1,1,2,2,2,2,1,2,2,1,1,1,0,0,2,2,0,1,1,1,2,2,1,1,1,1,1,1,2,2,2,1,1,1,1,0,0,1,1,1,1,0,1,1,2,1,0,1,2,2,1,1,1,2,0,2,1,1,1,0,2,2,1,1,2,2,2,2,1,1,1,1,1,1,1,1,1,1,1,1,0,1,1,1,2,2,2,0,2,1,2,2,2,2,2,2,0,1,1,1,1,2,0,0,1,2,1,1,1,2,0,1,0,1,1,1,2,0,2,2,1,1,1,1,1,2,1,1,2,0,1,1,2,1,2,0,2,2,1,2,0,1,1,1,1,2,1,0,0,0,2,0,1,2,2,0,1,1,1,2,2,1,1,1,2,1,0,1,1,1,1,2,1,1,1,1,1,2…	MAGIv3.1_79569	MAGIv3.1_79569	chr01	53707820	Consistent
416	IDP7480	sk	-	chr01	125.6	0	Dominant	+/-	ISU Map7	1,1,2,2,1,1,1,1,0,2,1,2,1,1,1,1,2,0,0,1,2,1,1,1,2,2,2,2,1,2,2,1,1,1,0,0,2,2,0,1,1,1,2,2,1,1,1,1,1,1,1,2,2,1,1,1,1,0,0,1,1,1,1,0,1,1,2,1,0,1,1,2,1,1,1,2,0,2,1,1,1,0,2,2,1,1,2,2,2,2,1,1,1,1,1,1,1,1,1,2,2,1,0,1,1,1,2,2,2,0,1,1,2,2,2,1,2,2,0,1,1,1,1,2,0,0,1,2,1,1,1,2,0,1,0,1,1,1,2,0,2,2,1,1,1,1,1,2,1,1,2,0,1,1,2,1,2,0,0,0,1,2,0,1,1,1,1,2,1,0,0,0,2,0,1,2,2,0,1,1,2,2,2,1,1,1,2,1,0,1,1,1,1,2,1,1,1,1,1,2…	MAGIv3.1_97996	MAGIv3.1_97996	chr01	54637830	Consistent
417	IDP8309	mu	IDP7480	chr01	125.6	1.7	Dominant	+/-	ISU Map7	1,1,2,2,2,1,1,2,0,2,1,2,1,2,1,1,2,0,0,1,2,1,1,1,2,2,2,2,1,2,2,1,1,1,0,0,2,2,0,1,1,1,2,2,1,1,1,1,1,1,1,2,2,1,1,2,2,0,0,1,1,1,1,0,1,1,2,1,0,1,1,2,1,1,1,2,0,2,1,1,1,0,2,2,1,1,2,2,2,2,1,1,1,1,1,1,1,1,1,2,2,1,0,1,1,1,2,2,2,0,1,1,2,2,2,1,2,2,0,1,1,1,1,2,0,0,1,2,1,1,1,2,0,1,0,1,1,1,2,0,2,2,1,1,1,1,1,2,1,1,2,0,1,1,2,1,2,0,2,2,1,2,0,1,1,1,1,2,1,0,0,0,2,0,1,2,2,0,1,1,2,2,2,1,1,1,1,1,0,1,1,1,1,2,1,1,1,1,1,2…	MAGIv3.1_91410	MAGIv3.1_91410	chr01	54841433	Consistent
418	MAGI_82106	mu	IDP7480	chr01	125.6	0.1	-	SNP	ISU SNP Map	1,1,0,2,1,1,1,2,0,2,1,2,1,1,1,1,2,0,0,1,2,1,1,1,2,2,2,2,1,2,2,1,1,1,0,0,2,2,0,0,1,1,2,2,1,1,1,1,1,1,1,2,2,1,1,1,1,0,0,1,1,1,1,0,1,1,2,0,0,1,1,2,1,1,1,2,0,2,1,1,1,0,2,2,1,1,2,2,2,2,1,1,1,1,1,1,1,1,1,2,2,1,0,1,1,1,2,2,2,0,1,1,2,2,2,1,2,2,0,1,1,1,1,2,0,0,1,2,1,1,1,2,0,1,0,1,1,1,2,0,2,2,1,1,0,1,1,2,1,1,2,0,1,1,2,1,2,0,0,0,1,2,0,1,1,1,1,2,1,0,0,0,2,0,1,2,2,0,1,1,2,2,2,1,1,1,2,1,0,1,1,1,1,2,1,1,1,1,1,2…	MAGIv3.1_82106	MAGIv3.1_82106	chr01	55488826	Consistent
419	MAGI_17220	mu	IDP7480	chr01	125.6	0.3	-	SNP	ISU SNP Map	1,1,0,2,1,1,1,2,0,2,1,2,1,1,1,1,2,0,0,1,2,1,1,1,2,2,0,2,1,2,2,1,1,1,0,0,2,2,0,0,1,1,2,2,1,1,1,1,1,1,1,2,2,0,1,1,1,0,0,1,1,1,1,0,1,1,2,0,0,1,1,2,1,1,1,2,0,2,1,1,1,0,2,2,1,1,2,2,2,2,1,1,1,1,1,1,1,1,1,2,2,1,0,1,1,1,2,2,2,0,1,1,2,2,2,1,2,2,0,1,1,1,1,2,0,0,1,2,1,1,1,2,0,1,0,1,1,1,2,0,2,2,1,1,0,1,1,2,1,1,2,0,1,1,2,1,2,0,0,0,1,2,0,1,1,1,1,2,1,0,0,0,2,0,1,2,2,0,1,1,2,2,2,1,1,1,2,1,0,1,1,1,1,2,1,1,1,1,1,2…	MAGIv3.1_17220	MAGIv3.1_17220	chr01	54288010	Consistent
420	MAGI_106053	mu	IDP7480	chr01	125.6	0.6	-	SNP	ISU SNP Map	1,1,0,2,1,1,1,2,0,2,1,2,1,1,1,1,2,0,0,1,2,1,1,1,2,2,2,2,1,2,2,1,1,1,0,0,2,2,0,0,1,1,2,2,1,1,1,1,1,1,1,2,2,1,1,1,1,0,0,1,1,1,1,0,1,1,2,0,0,1,1,2,1,1,1,2,0,2,1,1,1,0,2,2,1,1,2,2,2,2,1,1,1,1,1,1,1,1,1,2,2,1,0,1,1,1,1,2,2,0,1,1,2,0,2,1,2,2,0,1,1,1,1,2,0,0,1,2,1,1,1,2,0,1,0,1,1,1,2,0,2,2,1,1,0,1,1,2,1,1,2,0,1,1,2,1,2,0,0,0,1,2,0,1,1,1,1,2,1,0,0,0,2,0,1,2,2,0,1,1,2,0,2,0,1,1,2,1,0,1,1,1,0,0,0,1,1,1,1,2…	MAGIv3.1_106053	MAGIv3.1_106053	chr01	55559035	Consistent
421	cdo938a	mu	IDP7480	chr01	125.6	2.7	-	-	MMP	1,0,2,0,1,0,1,2,1,2,0,2,1,1,1,1,2,1,2,0,2,1,1,1,2,2,2,2,1,2,2,0,1,1,2,1,2,2,1,0,1,1,2,2,1,1,1,1,0,1,1,2,2,1,1,1,1,1,2,0,0,1,1,1,0,0,0,0,1,1,1,2,0,1,1,2,2,2,0,1,1,2,2,2,0,1,2,2,2,2,1,1,0,1,1,0,0,1,1,0,0,1,1,0,2,1,1,0,2,0,0,1,0,2,1,1,2,2,2,1,1,1,1,2,1,0,1,2,1,1,0,2,1,0,0,0,0,1,0,2,2,0,1,1,1,1,0,2,1,0,2,2,1,0,2,1,2,1,2,0,0,1,2,0,0,0,0,2,1,2,1,1,0,1,0,2,2,1,1,1,2,2,2,1,1,1,0,1,2,0,0,0,1,2,1,1,0,1,1,2…	-	-	-	-	-
422	gnp_QCM16c12	mu	IDP7480	chr01	125.6	0	-	-	Genoplante Map	1,0,0,0,1,0,1,2,0,2,0,2,0,1,0,1,0,0,0,0,2,1,1,1,0,2,2,2,1,2,2,0,1,1,0,0,2,0,0,0,0,0,2,2,0,0,0,1,0,1,1,0,0,1,0,1,1,0,0,0,0,1,1,0,0,0,0,0,1,1,0,2,0,0,0,0,0,0,0,0,0,0,0,0,0,0,0,0,0,0,0,0,0,0,0,0,0,0,0,0,0,0,0,0,0,0,0,0,0,0,0,0,0,0,0,0,0,0,0,0,0,0,0,0,0,0,0,0,0,0,0,0,0,0,0,0,0,0,0,0,0,0,0,0,0,0,0,0,0,0,0,0,0,0,0,0,0,0,0,0,0,0,0,0,0,0,0,0,0,0,0,0,0,0,0,0,0,0,0,0,0,0,0,0,0,0,0,0,0,0,0,0,0,0,0,0,0,0,0,0…	CX129582	-	-	-	-
423	gnp_QAU3h02	mu	IDP7480	chr01	125.6	0	-	-	Genoplante Map	1,0,0,0,1,0,1,2,0,2,0,2,0,1,1,1,2,0,0,1,2,1,1,1,0,2,2,2,1,2,2,0,0,1,0,0,2,0,0,0,0,0,2,2,0,0,1,1,0,1,1,0,0,0,0,1,1,0,0,0,0,1,1,0,0,0,0,0,1,1,0,2,0,0,0,0,0,0,0,0,0,0,0,0,0,0,0,0,0,0,0,0,0,0,0,0,0,0,0,0,0,0,0,0,0,0,0,0,0,0,0,0,0,0,0,0,0,0,0,0,0,0,0,0,0,0,0,0,0,0,0,0,0,0,0,0,0,0,0,0,0,0,0,0,0,0,0,0,0,0,0,0,0,0,0,0,0,0,0,0,0,0,0,0,0,0,0,0,0,0,0,0,0,0,0,0,0,0,0,0,0,0,0,0,0,0,0,0,0,0,0,0,0,0,0,0,0,0,0,0…	CD989860	CD989860	chr01	55175493	Consistent
424	TIDP5113	mu	IDP7480	chr01	125.6	2.6	Co-Dominant	TGCE	ISU Map7	1,0,0,0,1,0,1,2,0,2,0,2,0,1,1,1,2,0,0,1,2,1,1,1,0,2,1,2,2,2,1,2,1,1,0,0,2,2,0,0,1,0,2,2,0,1,1,1,0,1,1,0,2,1,0,1,1,0,2,0,0,1,2,0,0,0,0,0,1,1,0,2,0,1,0,0,0,0,0,0,0,0,0,0,0,0,0,0,0,0,0,0,0,0,0,0,0,0,0,0,0,0,0,0,0,0,0,0,0,0,0,0,0,0,0,0,0,0,0,0,0,0,0,0,0,0,0,0,0,0,0,0,0,0,0,0,0,0,0,0,0,0,0,0,0,0,0,0,0,0,0,0,0,0,0,0,0,0,0,0,0,0,0,0,0,0,0,0,0,0,0,0,0,0,0,0,0,0,0,0,0,0,0,0,0,0,0,0,0,0,0,0,0,0,0,0,0,0,0,0…	MAGIv3.1_1355	MAGIv3.1_1355	chr01	55029710	Consistent
425	IDP8453	mu	IDP7480	chr01	125.6	4.5	Co-Dominant	Size	ISU Map7	1,1,0,2,1,1,1,1,0,2,1,2,1,1,1,1,2,0,0,1,2,1,1,1,2,2,1,2,1,2,2,1,1,1,0,0,2,2,0,1,1,1,2,2,1,1,1,1,1,1,1,2,2,1,2,1,1,0,0,2,2,1,2,0,1,1,2,1,0,1,1,2,1,1,2,2,0,1,1,1,2,0,0,1,1,1,2,2,2,1,1,1,1,1,1,1,1,1,1,1,2,2,0,1,1,1,2,2,2,0,1,1,2,2,2,1,2,2,0,1,1,1,1,2,0,0,1,2,1,1,1,2,0,1,0,1,1,1,2,0,2,2,1,1,1,1,1,2,1,1,2,0,1,1,0,1,2,0,0,0,1,1,0,1,2,1,1,2,1,0,0,0,2,0,2,2,1,0,1,2,2,2,2,1,1,1,2,1,0,1,2,2,1,1,1,1,1,1,1,1…	MAGIv3.1_39974	MAGIv3.1_39974	chr01	54952815	Consistent
426	IDP1631a	mu	IDP7480	chr01	125.6	3.7	Dominant	+/-	ISU Map7	1,0,0,0,1,0,1,1,0,2,0,1,0,1,1,1,2,0,0,1,2,1,1,1,0,2,2,2,1,2,2,2,1,1,0,0,2,2,0,0,1,0,2,1,0,1,1,1,0,1,1,0,2,1,0,1,1,0,1,0,0,1,1,0,0,0,0,0,1,1,1,1,0,1,0,0,0,0,0,0,0,0,0,0,0,0,0,0,0,0,0,0,0,0,0,0,0,0,0,0,0,0,0,0,0,0,0,0,0,0,0,0,0,0,0,0,0,0,0,0,0,0,0,0,0,0,0,0,0,0,0,0,0,0,0,0,0,0,0,0,0,0,0,0,0,0,0,0,0,0,0,0,0,0,0,0,0,0,0,0,0,0,0,0,0,0,0,0,0,0,0,0,0,0,0,0,0,0,0,0,0,0,0,0,0,0,0,0,0,0,0,0,0,0,0,0,0,0,0,0…	MAGIv4.0_134053	-	-	-	-
427	mmp56	mu	IDP7480	chr01	125.6	1.3	-	-	MMP	1,0,2,0,1,0,1,2,1,2,1,2,0,1,1,1,2,1,2,1,2,1,1,1,2,2,2,2,1,1,2,0,1,1,2,1,2,2,0,1,1,1,2,2,0,1,1,1,0,1,1,0,2,0,1,1,1,1,2,0,0,1,1,1,0,0,0,0,1,1,1,2,0,1,1,2,2,2,0,1,2,0,2,2,1,0,0,2,2,2,1,1,0,1,1,0,0,1,1,0,2,1,1,0,1,1,2,0,2,1,1,0,0,0,0,1,0,0,0,0,1,1,0,0,1,0,1,2,1,1,0,2,1,1,1,0,1,1,2,2,2,0,1,1,1,1,0,2,1,0,2,2,1,0,2,1,2,1,2,0,0,1,2,0,2,0,0,2,1,1,1,1,2,1,1,2,2,1,1,1,2,2,2,1,1,1,1,1,2,0,2,1,1,2,1,1,0,1,1,2…	AZ916361,AZ916362,CC792470,CC759435,CC746250,CC746251,CC759436,CC792469	-	-	-	-
428	umc2145	mu	IDP7480	chr01	125.6	0.8	-	-	MMP	1,0,2,0,1,0,1,2,0,2,0,2,0,1,1,1,2,1,2,1,2,1,1,1,0,2,2,0,1,1,2,1,1,1,2,1,0,2,1,1,1,1,2,2,1,1,1,1,0,1,1,1,2,1,1,1,1,1,1,0,0,1,1,0,0,0,2,0,0,1,1,2,0,1,1,0,2,2,0,1,1,2,2,2,0,2,2,2,2,2,1,1,0,1,1,0,0,1,1,0,2,1,1,1,1,1,2,0,2,1,0,1,0,2,2,1,2,2,2,1,1,1,1,2,0,0,1,2,1,1,0,2,1,0,0,0,0,1,2,2,2,0,1,1,1,1,0,2,1,0,2,2,1,0,2,1,2,1,2,1,0,1,2,1,2,0,0,2,1,1,1,1,2,1,1,2,2,1,1,1,1,2,2,1,1,1,1,1,2,0,2,1,0,0,1,1,0,1,0,0…	AZ918767	-	-	-	-
429	umc2124	mu	IDP7480	chr01	125.6	1.1	-	-	MMP	1,0,2,0,1,0,1,2,0,2,0,2,0,1,1,1,2,1,2,1,2,1,1,1,0,2,2,2,1,0,2,1,1,1,2,1,2,2,0,1,1,1,0,2,0,1,1,0,0,1,1,0,2,0,0,0,0,1,0,0,0,1,1,1,0,0,2,0,0,1,1,2,0,1,1,2,2,2,0,1,1,2,2,2,0,0,2,2,2,0,0,1,0,1,1,0,0,1,1,0,2,1,1,0,1,1,2,0,2,1,0,1,0,2,2,1,2,2,2,0,1,0,1,2,0,0,1,2,1,1,0,2,1,0,0,0,0,1,2,2,2,0,0,1,1,1,0,2,1,0,2,2,1,0,2,1,2,1,2,0,0,0,2,0,2,0,0,2,1,1,1,1,2,1,1,2,2,1,1,1,2,2,2,1,1,1,1,0,2,0,2,2,0,0,1,1,0,1,0,2…	-	-	-	-	-
430	bnlg2238	mu	IDP7480	chr01	125.6	1.3	-	-	MMP	1,0,2,0,1,0,1,2,1,2,1,2,1,1,1,1,2,1,2,1,2,1,1,1,2,2,2,2,1,2,2,2,1,0,2,0,2,2,1,1,1,1,2,2,1,1,1,0,0,1,1,2,2,1,0,1,1,1,2,0,0,1,1,1,0,0,2,0,1,1,1,2,0,1,1,2,2,2,0,1,0,2,2,2,1,1,2,2,2,2,2,1,0,1,1,0,0,1,1,0,2,0,0,1,1,1,2,0,2,1,2,1,0,2,2,1,2,2,2,1,1,0,1,2,0,2,1,2,1,1,0,2,1,1,1,0,1,1,2,2,2,0,1,1,1,2,0,2,1,0,2,2,0,0,2,1,2,1,2,2,0,2,2,0,2,2,0,2,0,1,1,0,2,0,1,2,2,1,1,1,2,2,2,1,1,1,1,2,2,0,2,1,0,2,0,1,0,1,1,2…	-	-	-	-	-
431	bnlg1016	mu	IDP7480	chr01	125.6	0.8	-	-	Genoplante Map	0,0,0,0,1,0,1,2,0,2,0,2,0,1,1,1,2,0,0,0,2,1,1,1,0,2,2,2,1,2,2,0,1,1,0,0,2,2,0,0,1,0,2,2,0,1,1,1,0,1,1,0,2,1,0,1,1,0,2,0,0,1,1,0,0,0,0,0,1,1,1,2,0,1,0,0,0,0,0,0,0,0,0,0,0,0,0,0,0,0,0,0,0,0,0,0,0,0,0,0,0,0,0,0,0,0,0,0,0,0,0,0,0,0,0,0,0,0,0,0,0,0,0,0,0,0,0,0,0,0,0,0,0,0,0,0,0,0,0,0,0,0,0,0,0,0,0,0,0,0,0,0,0,0,0,0,0,0,0,0,0,0,0,0,0,0,0,0,0,0,0,0,0,0,0,0,0,0,0,0,0,0,0,0,0,0,0,0,0,0,0,0,0,0,0,0,0,0,0,0…	CC792470,CC792469	CC792470	chr01	55576638	Consistent
432	TIDP4590	mu	IDP7480	chr01	125.6	0	Co-Dominant	TGCE	ISU Map7	1,0,0,0,1,0,1,2,0,2,0,2,0,1,1,1,2,0,0,0,2,1,1,1,0,2,2,2,1,2,2,2,0,1,0,0,2,2,0,0,1,0,2,2,0,1,1,1,0,1,1,0,2,1,0,1,1,0,2,0,0,1,1,0,0,0,0,0,1,1,1,2,0,1,0,0,0,0,0,0,0,0,0,0,0,0,0,0,0,0,0,0,0,0,0,0,0,0,0,0,0,0,0,0,0,0,0,0,0,0,0,0,0,0,0,0,0,0,0,0,0,0,0,0,0,0,0,0,0,0,0,0,0,0,0,0,0,0,0,0,0,0,0,0,0,0,0,0,0,0,0,0,0,0,0,0,0,0,0,0,0,0,0,0,0,0,0,0,0,0,0,0,0,0,0,0,0,0,0,0,0,0,0,0,0,0,0,0,0,0,0,0,0,0,0,0,0,0,0,0…	MAGIv3.1_112797	MAGIv3.1_112797	chr01	55173001	Consistent
433	TIDP7054	mu	IDP7480	chr01	125.6	0	Co-Dominant	TGCE	ISU Map7	1,0,0,0,1,0,1,2,0,2,0,2,0,1,1,1,2,0,0,1,2,1,1,1,0,2,2,2,1,2,2,2,1,1,0,0,2,2,0,0,1,0,2,2,0,1,1,1,0,1,1,0,2,1,0,1,1,0,2,0,0,1,1,0,0,0,0,0,1,1,1,2,0,1,0,0,0,0,0,0,0,0,0,0,0,0,0,0,0,0,0,0,0,0,0,0,0,0,0,0,0,0,0,0,0,0,0,0,0,0,0,0,0,0,0,0,0,0,0,0,0,0,0,0,0,0,0,0,0,0,0,0,0,0,0,0,0,0,0,0,0,0,0,0,0,0,0,0,0,0,0,0,0,0,0,0,0,0,0,0,0,0,0,0,0,0,0,0,0,0,0,0,0,0,0,0,0,0,0,0,0,0,0,0,0,0,0,0,0,0,0,0,0,0,0,0,0,0,0,0…	MAGIv3.1_32499	MAGIv3.1_32499	chr01	55493449	Consistent
434	TIDP3614	mu	IDP7480	chr01	125.6	0	Co-Dominant	TGCE	ISU Map7	1,0,0,0,1,0,1,2,0,2,0,2,0,1,1,1,2,0,0,1,2,1,1,1,0,2,2,2,1,2,2,2,1,1,0,0,2,2,0,0,1,0,2,2,0,1,1,1,0,1,1,0,2,1,0,1,1,0,2,0,0,1,1,0,0,0,0,0,1,1,1,2,0,1,0,0,0,0,0,0,0,0,0,0,0,0,0,0,0,0,0,0,0,0,0,0,0,0,0,0,0,0,0,0,0,0,0,0,0,0,0,0,0,0,0,0,0,0,0,0,0,0,0,0,0,0,0,0,0,0,0,0,0,0,0,0,0,0,0,0,0,0,0,0,0,0,0,0,0,0,0,0,0,0,0,0,0,0,0,0,0,0,0,0,0,0,0,0,0,0,0,0,0,0,0,0,0,0,0,0,0,0,0,0,0,0,0,0,0,0,0,0,0,0,0,0,0,0,0,0…	MAGIv3.1_106053	MAGIv3.1_106053	chr01	55559035	Consistent
435	MAGI_33362	mu	IDP7480	chr01	125.6	0.3	-	SNP	ISU SNP Map	1,1,0,2,1,1,1,2,0,2,1,2,1,1,1,1,2,0,0,1,2,1,1,1,2,2,2,2,1,2,2,1,1,1,0,0,2,2,0,0,1,1,2,2,1,1,1,1,1,1,1,2,2,1,1,1,1,0,0,1,1,1,1,0,1,1,2,0,0,1,1,2,1,1,1,2,0,2,1,1,1,0,2,2,1,1,2,2,2,2,1,1,1,1,1,1,1,1,1,2,2,1,0,1,1,1,2,2,2,0,1,1,2,2,2,1,2,2,0,1,1,1,1,2,0,0,1,2,1,2,1,2,0,1,0,1,1,1,2,0,2,2,1,1,0,1,1,2,1,1,2,0,1,1,2,1,2,0,0,0,2,2,0,1,1,1,1,2,1,0,0,0,2,0,1,2,2,0,1,1,2,2,2,1,1,1,2,1,0,1,1,1,1,2,1,1,1,1,1,2…	MAGIv3.1_33362	-	-	-	-
436	MAGI_108915	sk	-	chr01	126.6	0	-	SNP	ISU SNP Map	1,1,0,2,1,1,1,2,0,2,1,2,1,1,1,1,2,0,0,1,2,1,1,1,2,2,2,2,1,2,2,1,1,1,0,0,2,2,0,0,1,1,2,2,1,1,1,1,1,1,1,2,2,1,1,1,1,0,0,1,1,1,1,0,1,1,2,0,0,1,1,2,1,1,1,2,0,2,1,1,1,0,2,2,1,1,2,2,2,2,1,1,1,1,1,1,1,1,1,2,2,1,0,1,1,1,2,2,2,0,1,1,2,2,2,1,2,2,0,1,1,1,1,2,0,0,1,2,1,1,1,2,0,1,0,1,1,1,2,0,2,2,1,1,0,1,1,2,1,1,2,0,1,1,2,1,2,0,0,0,2,2,0,1,1,1,1,2,1,0,0,0,2,0,1,2,2,0,1,1,2,2,2,1,1,1,2,1,0,1,2,1,1,2,1,1,1,1,1,2…	MAGIv3.1_108915	MAGIv3.1_108915	chr01	56325777	Consistent
437	TIDP5706	mu	MAGI_108915	chr01	126.6	1.1	Co-Dominant	TGCE	ISU Map7	1,0,0,0,1,0,1,2,0,2,0,2,0,1,1,1,2,0,0,1,2,1,1,2,0,2,2,2,1,2,0,1,1,1,0,0,2,2,0,0,1,0,2,2,0,1,1,1,0,1,1,0,2,1,0,1,1,0,2,0,0,1,2,0,0,0,0,0,1,1,1,2,0,1,0,0,0,0,0,0,0,0,0,0,0,0,0,0,0,0,0,0,0,0,0,0,0,0,0,0,0,0,0,0,0,0,0,0,0,0,0,0,0,0,0,0,0,0,0,0,0,0,0,0,0,0,0,0,0,0,0,0,0,0,0,0,0,0,0,0,0,0,0,0,0,0,0,0,0,0,0,0,0,0,0,0,0,0,0,0,0,0,0,0,0,0,0,0,0,0,0,0,0,0,0,0,0,0,0,0,0,0,0,0,0,0,0,0,0,0,0,0,0,0,0,0,0,0,0,0…	MAGIv3.1_87890	MAGIv3.1_87890	chr01	57199953	Consistent
438	TIDP3613	mu	MAGI_108915	chr01	126.6	0	Co-Dominant	TGCE	ISU Map7	1,0,0,0,1,0,1,2,0,2,0,2,0,1,1,1,2,0,0,1,2,1,1,2,0,2,2,2,1,2,2,1,1,1,0,0,2,2,0,0,1,0,2,2,0,1,1,1,0,1,1,0,2,1,0,1,1,0,2,0,0,1,2,0,0,0,0,0,1,1,1,2,0,1,0,0,0,0,0,0,0,0,0,0,0,0,0,0,0,0,0,0,0,0,0,0,0,0,0,0,0,0,0,0,0,0,0,0,0,0,0,0,0,0,0,0,0,0,0,0,0,0,0,0,0,0,0,0,0,0,0,0,0,0,0,0,0,0,0,0,0,0,0,0,0,0,0,0,0,0,0,0,0,0,0,0,0,0,0,0,0,0,0,0,0,0,0,0,0,0,0,0,0,0,0,0,0,0,0,0,0,0,0,0,0,0,0,0,0,0,0,0,0,0,0,0,0,0,0,0…	APSZ6907.R	APSZ6907.R	chr01	57082282	Consistent
439	IDP1489	sk	-	chr01	129.2	0	Co-Dominant	Size	ISU Map7	1,2,0,1,1,1,1,1,0,2,1,2,1,1,1,1,2,0,0,1,2,1,1,0,2,2,2,2,1,2,2,1,1,1,0,0,2,2,0,1,1,1,2,2,1,1,1,1,1,1,1,2,2,1,2,1,1,0,0,1,1,1,1,0,1,2,2,1,0,0,1,2,1,1,1,2,0,2,1,1,1,0,2,1,1,1,2,2,2,2,1,1,1,2,1,1,1,2,1,2,2,1,0,1,1,1,2,2,2,0,1,1,2,2,2,1,2,2,0,1,1,1,1,2,0,0,1,2,1,1,1,2,0,1,0,2,2,1,2,0,2,2,1,1,0,1,2,1,1,1,2,0,1,1,2,1,2,0,0,0,1,1,0,1,1,1,1,2,1,0,0,0,2,0,1,2,2,0,1,1,2,2,2,2,1,1,2,1,0,1,2,1,1,2,1,1,1,1,1,2…	MAGIv3.1_12272	-	-	-	-
440	IDP3984	mu	IDP1489	chr01	129.2	1.9	Co-Dominant	Size	ISU Map7	1,2,0,1,1,1,1,0,0,2,1,2,1,1,1,1,2,0,0,1,2,1,1,1,2,2,2,2,1,2,2,1,1,1,0,0,2,2,0,1,1,1,2,2,1,1,1,1,1,1,1,2,2,1,2,1,1,0,0,1,1,1,1,0,1,2,2,1,0,2,1,2,1,1,1,2,0,2,1,1,1,0,2,1,1,1,2,2,2,2,1,1,1,2,1,1,1,2,1,2,2,1,0,1,1,1,2,2,2,0,1,1,2,2,2,1,2,2,0,0,1,1,1,2,0,0,1,2,1,1,1,2,0,1,0,2,2,1,2,0,2,2,1,1,0,1,2,1,1,1,2,0,1,1,2,1,2,0,0,0,1,1,0,1,1,1,1,2,1,0,0,0,2,0,1,2,2,0,1,1,2,2,2,2,1,1,2,1,0,1,2,1,1,2,2,1,1,1,1,2…	MAGIv3.1_12272	-	-	-	-
441	TIDP5229	mu	IDP1489	chr01	129.2	3.4	Co-Dominant	TGCE	ISU Map7	1,0,0,0,1,0,1,2,0,2,0,2,0,1,1,0,2,0,0,2,2,1,1,0,0,2,2,2,1,2,2,1,1,1,0,0,2,2,0,0,1,0,2,2,0,1,0,1,0,1,1,0,2,1,0,1,1,0,2,0,0,1,2,0,0,0,0,0,1,1,1,0,0,1,0,0,0,0,0,0,0,0,0,0,0,0,0,0,0,0,0,0,0,0,0,0,0,0,0,0,0,0,0,0,0,0,0,0,0,0,0,0,0,0,0,0,0,0,0,0,0,0,0,0,0,0,0,0,0,0,0,0,0,0,0,0,0,0,0,0,0,0,0,0,0,0,0,0,0,0,0,0,0,0,0,0,0,0,0,0,0,0,0,0,0,0,0,0,0,0,0,0,0,0,0,0,0,0,0,0,0,0,0,0,0,0,0,0,0,0,0,0,0,0,0,0,0,0,0,0…	MAGIv3.1_65949	MAGIv3.1_65949	chr01	56992599	Consistent
442	IDP7976	mu	IDP1489	chr01	129.2	2.7	Dominant	+/-	ISU Map7	1,2,2,1,1,1,1,1,0,2,1,2,1,1,1,1,2,0,0,1,2,1,1,2,2,2,2,2,1,2,2,1,1,1,0,0,2,2,0,1,1,1,1,2,1,1,1,1,1,1,1,1,2,1,1,1,1,0,0,1,1,1,2,0,1,1,2,1,0,1,1,2,1,1,1,2,0,2,1,1,1,0,2,1,1,1,2,2,2,2,2,1,1,2,1,1,1,2,2,2,2,1,0,1,1,1,2,2,2,0,1,2,2,2,2,1,2,2,0,1,1,1,1,2,0,0,1,2,1,1,1,1,0,2,0,2,1,2,2,0,2,1,1,1,1,2,2,1,1,2,1,0,1,2,1,2,2,0,2,2,2,2,0,1,1,1,1,2,1,0,0,0,2,0,1,2,2,0,1,1,2,2,1,2,1,1,1,1,0,1,2,1,1,2,1,1,1,1,1,2…	MAGIv3.1_30829	MAGIv3.1_30829	chr01	58643135	Consistent
443	asg75	mu	IDP1489	chr01	129.2	0.6	-	-	MMP	1,0,0,0,1,0,1,2,1,2,1,2,1,1,1,1,2,1,2,1,2,1,1,2,2,2,2,2,1,2,2,1,1,1,2,1,2,2,1,0,1,1,1,2,1,1,1,1,0,1,1,1,2,1,1,1,1,1,2,0,0,1,2,1,0,0,2,0,1,1,1,2,0,1,1,2,2,2,0,1,1,2,2,1,1,1,2,2,2,2,2,1,0,2,0,0,0,2,2,0,2,1,1,1,1,1,0,0,2,1,0,2,0,2,2,1,2,2,2,1,1,1,1,2,1,0,1,1,1,1,0,2,1,1,1,0,2,1,2,0,2,0,1,1,1,0,0,2,1,0,2,2,1,0,2,1,2,2,2,2,0,1,2,1,2,0,0,2,1,1,1,1,2,1,1,2,2,2,1,1,2,2,2,2,1,1,1,0,2,0,0,2,1,2,0,1,0,1,1,2…	AF377510,AF377517	AF377510,AF377517	chr01	59571311	Consistent
444	TIDP3716	mu	IDP1489	chr01	129.2	0	Co-Dominant	TGCE	ISU Map7	1,0,0,0,1,0,1,2,0,2,0,2,0,1,1,1,2,0,0,1,2,1,1,2,0,2,2,2,1,2,2,1,1,1,0,0,2,2,0,0,1,0,1,2,0,1,1,1,0,1,1,0,2,1,0,1,1,0,2,0,0,1,2,0,0,0,0,0,1,1,1,2,0,1,0,0,0,0,0,0,0,0,0,0,0,0,0,0,0,0,0,0,0,0,0,0,0,0,0,0,0,0,0,0,0,0,0,0,0,0,0,0,0,0,0,0,0,0,0,0,0,0,0,0,0,0,0,0,0,0,0,0,0,0,0,0,0,0,0,0,0,0,0,0,0,0,0,0,0,0,0,0,0,0,0,0,0,0,0,0,0,0,0,0,0,0,0,0,0,0,0,0,0,0,0,0,0,0,0,0,0,0,0,0,0,0,0,0,0,0,0,0,0,0,0,0,0,0,0,0…	BG841102	BG841102	chr01	59131957	Consistent
445	TIDP5730	mu	IDP1489	chr01	129.2	0	Co-Dominant	TGCE	ISU Map7	1,0,0,0,1,0,1,2,0,2,0,2,0,1,1,1,2,0,0,1,2,1,1,2,0,2,2,2,1,2,2,1,1,1,0,0,0,2,0,0,1,0,1,2,0,1,1,1,0,1,1,0,2,1,0,1,1,0,2,0,0,1,2,0,0,0,0,0,1,1,1,2,0,1,0,0,0,0,0,0,0,0,0,0,0,0,0,0,0,0,0,0,0,0,0,0,0,0,0,0,0,0,0,0,0,0,0,0,0,0,0,0,0,0,0,0,0,0,0,0,0,0,0,0,0,0,0,0,0,0,0,0,0,0,0,0,0,0,0,0,0,0,0,0,0,0,0,0,0,0,0,0,0,0,0,0,0,0,0,0,0,0,0,0,0,0,0,0,0,0,0,0,0,0,0,0,0,0,0,0,0,0,0,0,0,0,0,0,0,0,0,0,0,0,0,0,0,0,0,0…	MAGIv3.1_8573	MAGIv3.1_8573	chr01	59533542	Consistent
446	umc1169	mu	IDP1489	chr01	129.2	1.4	-	-	MMP	1,0,1,0,1,0,2,2,1,2,1,2,1,1,1,1,0,1,0,0,0,1,1,2,2,2,2,2,1,2,2,1,1,1,2,1,2,2,1,1,1,1,1,2,1,1,1,1,0,1,1,1,2,1,1,1,2,1,2,0,0,1,2,1,0,0,2,0,1,1,1,2,0,1,1,2,2,0,0,1,1,2,0,1,1,1,2,2,2,2,2,1,0,2,1,0,0,2,2,0,2,1,1,1,1,1,2,0,2,1,2,2,0,2,2,1,2,2,2,0,1,1,1,2,1,2,1,1,1,1,0,2,1,1,1,0,2,1,2,2,2,0,1,1,1,1,0,2,1,0,2,2,1,0,2,1,2,2,2,2,0,1,2,0,2,0,0,2,1,1,1,1,0,1,1,2,2,2,1,1,2,2,2,2,1,1,1,1,2,0,2,2,1,2,1,1,0,1,1,2…	AI396370,AY109448	-	-	-	-
447	umc1849	mu	IDP1489	chr01	129.2	2.7	-	-	MMP	1,0,2,0,1,0,1,2,1,2,1,2,1,1,1,1,2,1,2,1,2,1,1,2,2,2,2,2,1,2,2,1,1,1,2,1,2,2,1,1,1,1,2,2,1,1,1,1,0,1,1,2,2,1,1,1,1,0,2,0,0,1,2,1,0,0,2,0,1,1,1,2,0,1,1,2,2,2,0,1,1,2,2,1,1,1,2,2,2,2,2,1,0,2,1,0,0,2,2,0,2,1,1,1,1,1,2,0,2,1,2,2,0,2,2,1,2,2,2,1,1,1,1,2,1,2,1,1,1,1,0,2,1,1,1,0,2,1,2,2,2,0,1,1,1,1,0,2,1,0,2,2,1,0,2,1,2,2,2,2,0,1,2,2,2,2,0,2,1,1,1,1,2,1,1,0,2,2,1,0,2,2,2,2,1,1,1,1,2,0,2,2,1,2,1,1,0,1,1,2…	G68012	-	-	-	-
448	IDP7817	mu	IDP1489	chr01	129.2	1.9	Co-Dominant	Size	ISU Map7	1,2,0,1,1,1,1,1,0,2,1,2,1,1,1,1,2,0,0,1,2,1,1,2,2,2,2,2,1,2,2,2,1,1,0,0,2,2,0,1,1,1,2,2,1,1,1,1,1,1,1,2,2,1,1,1,1,0,0,1,1,1,1,0,1,2,2,1,0,1,1,2,1,1,1,2,0,2,1,1,1,0,2,1,1,1,2,2,2,2,2,1,1,2,1,1,1,2,2,2,2,1,0,1,1,1,2,2,2,0,1,1,2,2,2,1,2,2,0,1,1,1,1,2,0,0,1,2,1,1,1,2,0,1,0,2,2,1,2,0,2,2,1,1,1,1,2,2,1,1,2,0,1,1,2,1,2,0,0,0,2,2,0,1,1,1,1,2,1,0,0,0,2,0,1,2,2,0,1,1,2,2,2,2,1,1,1,1,0,1,2,1,1,2,1,1,1,1,1,2…	MAGIv3.1_6045	MAGIv3.1_6045	chr01	56881570	Consistent
449	MAGI_103182_W2	mu	IDP1489	chr01	129.2	0.7	-	SNP	ISU SNP Map	1,2,0,1,1,1,1,0,0,2,1,2,1,1,1,1,1,0,0,1,0,1,1,2,2,2,0,2,1,2,2,1,1,1,0,0,2,2,0,0,1,1,1,2,1,1,1,1,1,1,1,1,0,0,1,1,1,0,0,1,1,1,2,0,1,1,0,0,0,1,1,0,1,1,1,2,0,2,1,1,1,0,2,1,1,1,2,2,2,2,2,1,1,2,1,1,1,2,2,2,2,1,0,1,1,1,2,1,2,0,2,1,2,2,2,1,2,2,0,1,1,1,1,2,0,0,1,2,1,1,1,2,0,1,0,2,2,1,2,0,2,2,1,1,0,1,2,0,1,1,2,0,1,1,2,1,2,0,0,0,2,2,0,1,1,1,1,2,1,0,0,0,2,0,1,2,2,0,1,1,2,2,2,2,1,1,2,1,0,1,2,1,1,2,1,1,1,1,1,2…	MAGIv3.1_103182	MAGIv3.1_103182	chr01	57439553	Consistent
450	MAGI_103182_W44	mu	IDP1489	chr01	129.2	0.5	-	SNP	ISU SNP Map	1,2,0,1,1,1,1,2,0,2,1,2,1,1,1,1,2,0,0,1,2,1,1,0,2,2,2,2,1,2,2,1,1,1,0,0,2,2,0,0,1,1,1,2,1,1,1,1,1,1,1,1,2,1,1,1,1,0,0,1,1,1,2,0,1,1,2,0,0,1,1,2,1,1,1,2,0,2,1,1,1,0,2,1,1,1,2,2,2,2,2,1,1,2,1,1,1,2,2,2,2,1,0,1,1,1,2,2,2,0,2,2,2,2,2,1,2,2,0,1,1,1,1,2,0,0,1,2,1,1,1,2,0,1,0,2,2,1,2,0,2,2,1,1,0,1,2,2,1,1,2,0,1,1,2,1,2,0,0,0,2,0,0,1,1,1,1,2,1,0,0,0,2,0,1,2,2,0,1,1,2,2,2,2,1,1,2,1,0,1,2,1,1,2,1,1,1,1,1,2…	MAGIv3.1_103182	MAGIv3.1_103182	chr01	57439553	Consistent
451	IDP8320	mu	IDP1489	chr01	129.2	0.5	Co-Dominant	Size	ISU Map7	1,2,0,1,1,1,1,2,0,2,1,2,1,1,1,1,2,0,0,1,2,1,1,2,2,2,2,2,1,2,2,1,1,1,0,0,2,2,0,1,1,1,1,2,1,1,1,1,1,1,0,1,2,1,1,1,1,0,0,1,1,1,2,0,1,1,2,1,0,1,1,2,1,1,1,2,0,2,1,1,1,0,2,1,1,1,2,2,2,2,2,1,1,2,1,1,1,2,2,2,2,1,0,1,1,1,2,2,2,0,2,2,2,2,2,1,2,2,0,1,1,1,1,2,0,0,1,2,1,0,1,2,0,1,0,2,2,1,2,0,2,2,1,1,2,1,2,2,1,1,2,0,1,1,2,1,2,0,0,0,2,2,0,1,1,1,1,2,1,0,0,0,2,0,1,2,2,0,1,1,2,2,2,2,1,1,2,1,0,1,2,1,1,2,2,1,1,1,1,2…	MAGIv3.1_97893	MAGIv3.1_97893	chr01	58539648	Consistent
452	IDP8612	mu	IDP1489	chr01	129.2	1	Dominant	-/+	ISU Map7	1,2,0,1,1,1,1,2,0,2,1,2,1,1,1,1,2,0,0,1,2,1,1,0,2,2,2,2,1,2,2,1,1,1,0,0,2,2,0,1,1,1,1,2,1,1,1,1,1,1,1,1,2,1,1,1,1,0,0,1,1,1,2,0,1,1,2,1,0,1,1,2,1,1,1,2,0,2,1,1,1,0,2,1,1,1,2,2,2,2,2,1,1,2,1,1,1,2,0,2,2,1,0,1,0,1,2,2,2,0,2,2,2,2,2,1,2,2,0,1,1,1,1,2,0,0,1,2,1,0,1,2,0,1,0,2,2,1,2,0,2,2,1,1,2,1,2,2,1,1,2,0,1,1,2,1,2,0,0,0,2,2,0,1,1,1,1,2,1,0,0,0,2,0,1,2,2,0,1,1,2,2,2,2,1,1,2,1,0,1,2,1,1,2,1,1,1,1,1,2…	MAGIv3.1_57503	MAGIv3.1_57503	chr09	125409563	Inconsistent
453	IDP7629	sk	-	chr01	131.2	0	Co-Dominant	Size	ISU Map7	1,2,0,1,1,1,2,1,0,2,1,2,1,1,1,1,2,0,0,1,2,1,1,2,2,2,2,2,1,2,2,1,1,1,0,0,2,2,0,1,1,1,1,2,1,1,1,1,1,1,1,1,2,1,1,1,2,0,0,1,1,1,1,0,1,1,2,1,0,1,1,2,1,1,1,2,0,2,1,1,1,0,2,1,1,1,2,2,2,2,2,1,1,2,1,1,1,2,2,2,2,1,0,1,1,1,2,2,2,0,2,2,2,2,2,1,2,2,0,1,1,1,1,2,0,0,1,2,1,1,1,2,0,1,0,2,2,1,2,0,2,2,1,1,1,1,2,2,1,1,2,0,1,1,2,1,2,0,0,0,2,2,0,1,1,1,1,2,1,0,0,0,2,0,1,2,2,0,1,1,2,2,2,2,1,1,2,1,0,1,2,1,1,2,0,1,1,1,1,2…	MAGIv3.1_70605	MAGIv3.1_70605	chr01	60741989	Consistent
454	IDP739	sk	-	chr01	131.2	0	Dominant	+/-	ISU Map7	1,2,2,1,1,1,2,1,0,2,1,2,1,1,1,1,2,0,0,1,2,1,1,2,2,2,2,2,1,2,2,1,1,1,0,0,2,2,0,1,1,1,1,2,1,1,1,1,1,1,1,1,2,1,1,1,2,0,0,1,1,1,1,0,1,1,2,1,0,1,1,2,1,1,1,2,0,2,1,1,1,0,2,1,1,1,2,2,2,2,2,1,1,2,1,1,1,2,2,2,2,1,0,1,1,1,2,2,2,0,2,2,2,2,2,1,2,2,0,1,1,1,1,2,0,0,1,2,1,1,1,2,0,1,0,2,2,1,2,0,2,2,1,1,1,1,2,2,1,1,2,0,1,1,2,1,2,0,2,2,2,2,0,1,1,1,1,2,1,0,0,0,2,0,1,2,2,0,1,1,2,2,2,2,1,1,2,1,0,1,2,1,1,2,1,1,1,1,1,2…	MAGIv3.1_70607	MAGIv3.1_70607	chr01	61032209	Consistent
455	IDP197	mu	IDP739	chr01	131.2	1.3	Dominant	+/-	ISU Map7	1,2,1,1,1,1,2,1,0,2,1,2,1,1,1,1,2,0,0,1,2,1,1,2,2,2,2,2,1,2,2,1,1,1,0,0,2,2,0,1,1,1,1,2,1,1,1,1,1,1,1,1,2,1,1,1,2,0,0,1,1,1,1,0,1,1,2,1,0,2,1,2,1,1,1,2,0,2,1,1,1,0,2,1,1,1,2,2,2,2,2,1,1,2,1,1,1,2,2,2,2,1,0,1,1,1,2,2,2,0,2,2,2,2,2,1,2,2,0,1,1,1,1,2,0,0,1,2,1,1,1,2,0,1,0,2,2,1,2,0,2,2,1,1,1,1,2,2,1,1,2,0,1,1,2,1,2,0,2,2,2,2,0,1,1,1,1,2,1,0,0,0,2,0,1,2,2,0,1,1,2,2,2,2,1,1,2,1,0,1,2,1,1,2,1,1,1,1,1,2…	BM074489	BM074489	chr01	60743272	Consistent
456	IDP8961	mu	IDP739	chr01	131.2	1.4	Co-Dominant	Size	ISU Map7	1,2,0,1,1,1,2,1,0,2,1,2,1,1,1,1,2,0,0,1,2,1,1,2,2,1,1,1,0,2,2,1,1,1,0,0,2,2,0,1,1,1,1,2,1,1,1,1,1,1,1,1,2,1,1,0,2,0,0,1,1,1,2,0,1,1,2,1,0,1,1,2,1,1,1,2,0,2,1,1,1,0,2,1,1,1,2,0,2,2,2,1,1,2,1,1,1,0,2,2,2,1,0,1,1,2,2,2,2,0,2,2,2,2,2,1,2,2,0,1,1,1,1,2,0,0,1,2,1,1,1,2,0,1,0,2,2,1,2,0,2,2,1,1,1,1,2,2,1,1,2,0,1,1,2,1,2,0,0,0,2,2,0,1,1,1,1,2,1,0,0,0,2,0,1,2,2,0,1,1,2,2,2,2,1,1,2,1,0,1,2,1,2,2,1,1,1,1,1,2…	MAGIv3.1_266	MAGIv3.1_266	chr01	60157612	Consistent
457	IDP8458	mu	IDP739	chr01	131.2	0.5	Co-Dominant	Size	ISU Map7	1,2,0,2,2,1,2,1,0,2,1,0,1,2,1,1,2,0,0,1,2,1,1,2,2,2,2,2,1,2,2,1,1,1,0,0,2,2,0,1,1,1,1,2,1,1,1,1,1,1,1,1,2,1,1,1,2,0,0,1,1,1,1,0,1,1,2,1,0,1,1,2,1,1,1,2,0,2,1,1,1,0,2,1,1,1,2,2,0,2,2,1,1,2,1,1,1,2,2,2,2,1,0,1,1,1,2,2,2,0,2,2,2,2,2,0,2,2,0,1,1,1,1,2,0,0,1,2,1,1,1,2,0,1,0,2,2,1,2,0,2,2,1,1,1,1,2,2,1,1,2,0,1,1,0,1,2,0,0,0,2,2,0,1,1,1,1,2,1,0,0,0,2,0,1,2,2,0,0,1,2,2,2,2,1,1,2,1,0,1,2,1,1,2,1,1,1,1,1,2…	MAGIv3.1_41760	MAGIv3.1_41760	chr01	60900626	Consistent
458	IDP4806	mu	IDP739	chr01	131.2	1.1	Dominant	+/-	ISU Map7	1,2,2,2,2,1,2,1,0,2,2,2,1,1,1,1,2,0,0,1,2,1,1,2,2,2,2,2,1,2,2,1,1,1,0,0,2,2,0,1,1,1,1,2,1,1,1,1,1,1,1,1,2,1,1,1,2,0,0,1,1,1,1,0,1,1,2,1,0,1,1,2,1,1,1,2,0,2,1,1,1,0,2,1,1,1,2,2,2,2,2,1,1,2,1,1,1,2,2,2,2,1,0,1,1,1,2,2,2,0,2,2,2,2,2,1,2,2,0,1,1,1,1,2,0,0,1,2,1,1,1,2,0,1,0,2,2,1,2,0,2,2,1,1,1,1,2,2,1,1,2,0,1,1,2,1,2,0,0,0,2,2,0,1,1,1,1,2,1,0,0,0,2,0,1,2,2,0,1,1,2,2,2,2,1,1,2,1,0,1,2,1,1,2,1,1,1,1,1,2…	MAGIv3.1_25058	MAGIv3.1_25058	chr01	61198992	Consistent
459	IDP1979	mu	IDP739	chr01	131.2	1.4	Dominant	+/-	ISU Map7	1,2,2,1,1,1,2,1,0,2,1,2,1,1,1,1,2,0,0,1,2,1,1,2,2,2,2,2,1,2,2,1,1,1,0,0,2,2,0,1,1,1,1,2,1,1,1,1,1,1,1,1,2,1,1,1,2,0,0,1,1,1,1,0,1,1,2,1,0,1,1,2,1,1,1,2,0,2,1,1,1,0,2,1,1,1,2,2,2,2,2,1,1,2,1,1,1,2,2,2,2,1,0,1,1,1,2,2,2,0,2,2,2,2,2,1,2,2,0,1,1,1,1,2,0,0,1,2,1,1,1,2,0,1,0,2,2,1,2,0,2,2,1,1,1,1,2,2,1,1,2,0,1,1,2,1,2,0,0,0,2,2,0,1,1,1,1,2,1,0,0,0,2,0,1,2,2,0,1,1,2,2,2,2,1,1,2,1,0,1,2,1,1,2,1,1,2,1,1,2…	BM079958	BM079958	chr01	61101870	Consistent
460	IDP8569	mu	IDP739	chr01	131.2	2	Co-Dominant	Size	ISU Map7	1,2,0,2,1,1,2,1,0,2,1,2,1,1,1,1,2,0,0,1,2,1,1,2,2,2,2,2,1,2,2,1,1,1,0,0,2,2,0,1,1,1,1,2,1,1,1,2,0,0,0,0,2,1,1,1,2,0,0,1,1,1,1,0,1,1,2,1,0,1,1,2,1,1,1,2,0,2,1,1,1,0,2,1,1,1,2,2,2,2,2,1,1,2,1,1,1,2,1,1,2,1,0,1,1,1,2,2,2,0,2,2,2,2,2,1,2,2,0,1,1,1,1,2,0,0,1,2,1,1,1,2,0,1,0,2,2,1,2,0,2,2,1,1,2,1,2,2,0,1,2,0,1,1,2,1,2,0,0,0,2,2,0,1,1,1,1,2,1,0,0,0,2,0,1,2,2,0,1,1,2,2,2,2,1,1,2,1,0,1,2,1,1,2,1,1,1,1,1,2…	MAGIv3.1_44960	MAGIv3.1_44960	chr01	214292900	Inconsistent
461	gnp_QAF11g10a	mu	IDP739	chr01	131.2	1.9	-	-	Genoplante Map	0,0,0,0,1,0,2,1,0,2,0,0,0,1,1,1,2,0,0,1,2,1,1,2,0,2,2,2,1,0,2,1,1,1,0,0,2,0,0,0,0,0,1,0,0,0,1,1,0,1,1,0,0,1,0,0,2,0,0,0,0,1,1,0,0,0,0,0,1,1,0,1,0,0,0,0,0,0,0,0,0,0,0,0,0,0,0,0,0,0,0,0,0,0,0,0,0,0,0,0,0,0,0,0,0,0,0,0,0,0,0,0,0,0,0,0,0,0,0,0,0,0,0,0,0,0,0,0,0,0,0,0,0,0,0,0,0,0,0,0,0,0,0,0,0,0,0,0,0,0,0,0,0,0,0,0,0,0,0,0,0,0,0,0,0,0,0,0,0,0,0,0,0,0,0,0,0,0,0,0,0,0,0,0,0,0,0,0,0,0,0,0,0,0,0,0,0,0,0,0…	CX129462	-	-	-	-
462	gnp_QBI2c02	mu	IDP739	chr01	131.2	0.9	-	-	Genoplante Map	1,0,0,0,1,0,2,2,0,2,0,2,0,1,1,1,2,0,0,1,2,1,1,2,0,2,2,2,1,2,2,0,1,1,0,0,0,0,0,0,0,0,1,2,0,0,1,1,0,1,1,0,0,1,0,1,2,0,0,0,0,1,1,0,0,0,0,0,1,1,0,2,0,0,0,0,0,0,0,0,0,0,0,0,0,0,0,0,0,0,0,0,0,0,0,0,0,0,0,0,0,0,0,0,0,0,0,0,0,0,0,0,0,0,0,0,0,0,0,0,0,0,0,0,0,0,0,0,0,0,0,0,0,0,0,0,0,0,0,0,0,0,0,0,0,0,0,0,0,0,0,0,0,0,0,0,0,0,0,0,0,0,0,0,0,0,0,0,0,0,0,0,0,0,0,0,0,0,0,0,0,0,0,0,0,0,0,0,0,0,0,0,0,0,0,0,0,0,0,0…	CF007404	-	-	-	-
463	TIDP5725	mu	IDP739	chr01	131.2	1.1	Co-Dominant	TGCE	ISU Map7	1,0,0,0,1,0,2,2,0,2,0,2,0,1,1,0,2,0,0,1,2,1,1,2,0,2,2,2,1,2,2,2,1,1,0,0,2,2,0,0,1,0,1,2,0,1,1,1,0,1,1,0,2,1,0,1,2,0,1,0,0,1,1,0,0,0,0,0,1,2,1,2,0,1,0,0,0,0,0,0,0,0,0,0,0,0,0,0,0,0,0,0,0,0,0,0,0,0,0,0,0,0,0,0,0,0,0,0,0,0,0,0,0,0,0,0,0,0,0,0,0,0,0,0,0,0,0,0,0,0,0,0,0,0,0,0,0,0,0,0,0,0,0,0,0,0,0,0,0,0,0,0,0,0,0,0,0,0,0,0,0,0,0,0,0,0,0,0,0,0,0,0,0,0,0,0,0,0,0,0,0,0,0,0,0,0,0,0,0,0,0,0,0,0,0,0,0,0,0,0…	MAGIv3.1_111561	MAGIv3.1_111561	chr01	65061087	Consistent
464	IDPCP18749b	mu	IDP739	chr01	131.2	1.4	Dominant	+/-	ISU Map7	1,0,0,0,1,0,2,2,0,2,0,2,0,1,1,1,2,0,0,1,2,1,1,2,0,2,2,2,1,2,2,2,1,1,0,0,2,2,0,0,2,0,1,2,0,1,1,1,0,1,1,0,2,1,0,1,2,0,1,0,0,1,1,0,0,0,0,0,1,2,1,2,0,1,0,0,0,0,0,0,0,0,0,0,0,0,0,0,0,0,0,0,0,0,0,0,0,0,0,0,0,0,0,0,0,0,0,0,0,0,0,0,0,0,0,0,0,0,0,0,0,0,0,0,0,0,0,0,0,0,0,0,0,0,0,0,0,0,0,0,0,0,0,0,0,0,0,0,0,0,0,0,0,0,0,0,0,0,0,0,0,0,0,0,0,0,0,0,0,0,0,0,0,0,0,0,0,0,0,0,0,0,0,0,0,0,0,0,0,0,0,0,0,0,0,0,0,0,0,0…	MAGIv3.1_18749	-	-	-	-
465	TIDP5147	mu	IDP739	chr01	131.2	1	Co-Dominant	TGCE	ISU Map7	1,0,0,0,1,0,2,2,0,2,0,2,0,1,1,1,2,0,0,1,2,1,1,2,0,2,1,2,1,2,2,2,1,1,0,0,2,2,0,0,2,0,1,2,0,1,1,1,0,1,1,0,2,1,0,1,2,0,1,0,0,1,1,0,0,0,0,0,1,1,1,2,0,1,0,0,0,0,0,0,0,0,0,0,0,0,0,0,0,0,0,0,0,0,0,0,0,0,0,0,0,0,0,0,0,0,0,0,0,0,0,0,0,0,0,0,0,0,0,0,0,0,0,0,0,0,0,0,0,0,0,0,0,0,0,0,0,0,0,0,0,0,0,0,0,0,0,0,0,0,0,0,0,0,0,0,0,0,0,0,0,0,0,0,0,0,0,0,0,0,0,0,0,0,0,0,0,0,0,0,0,0,0,0,0,0,0,0,0,0,0,0,0,0,0,0,0,0,0,0…	MAGIv3.1_88544	MAGIv3.1_88544	chr01	62289460	Consistent
466	TIDP2784	mu	IDP739	chr01	131.2	0.8	Co-Dominant	TGCE	ISU Map7	1,0,0,0,1,0,2,2,0,2,0,2,0,1,1,1,2,0,0,1,2,1,1,2,0,2,2,2,0,2,2,0,1,1,0,0,2,2,0,0,1,0,1,2,0,1,1,1,0,1,1,0,2,1,0,1,2,0,1,0,0,1,1,0,0,0,0,0,1,1,1,2,0,1,0,0,0,0,0,0,0,0,0,0,0,0,0,0,0,0,0,0,0,0,0,0,0,0,0,0,0,0,0,0,0,0,0,0,0,0,0,0,0,0,0,0,0,0,0,0,0,0,0,0,0,0,0,0,0,0,0,0,0,0,0,0,0,0,0,0,0,0,0,0,0,0,0,0,0,0,0,0,0,0,0,0,0,0,0,0,0,0,0,0,0,0,0,0,0,0,0,0,0,0,0,0,0,0,0,0,0,0,0,0,0,0,0,0,0,0,0,0,0,0,0,0,0,0,0,0…	MAGIv4.0_37023	MAGIv4.0_37023	chr01	62977755	Consistent
467	gnp_QBL13c04	mu	IDP739	chr01	131.2	0	-	-	Genoplante Map	1,0,0,0,1,0,2,2,0,2,0,2,0,1,1,1,2,0,0,1,2,1,0,0,0,0,0,2,1,2,2,0,1,1,0,0,2,0,0,0,0,0,1,2,0,0,0,1,0,1,1,0,0,1,0,1,2,0,0,0,0,1,1,0,0,0,0,0,1,1,0,2,0,0,0,0,0,0,0,0,0,0,0,0,0,0,0,0,0,0,0,0,0,0,0,0,0,0,0,0,0,0,0,0,0,0,0,0,0,0,0,0,0,0,0,0,0,0,0,0,0,0,0,0,0,0,0,0,0,0,0,0,0,0,0,0,0,0,0,0,0,0,0,0,0,0,0,0,0,0,0,0,0,0,0,0,0,0,0,0,0,0,0,0,0,0,0,0,0,0,0,0,0,0,0,0,0,0,0,0,0,0,0,0,0,0,0,0,0,0,0,0,0,0,0,0,0,0,0,0…	CX129512	CX129512	chr01	63055737	Consistent
468	psb50	mu	IDP739	chr01	131.2	0	-	-	Genoplante Map	1,0,0,0,1,0,2,2,0,2,0,2,0,1,1,1,2,0,0,0,2,1,1,2,0,2,2,2,1,2,2,0,0,1,0,0,2,2,0,0,1,0,1,2,0,1,1,1,0,1,1,0,2,1,0,1,2,0,1,0,0,1,1,0,0,0,0,0,1,1,1,2,0,1,0,0,0,0,0,0,0,0,0,0,0,0,0,0,0,0,0,0,0,0,0,0,0,0,0,0,0,0,0,0,0,0,0,0,0,0,0,0,0,0,0,0,0,0,0,0,0,0,0,0,0,0,0,0,0,0,0,0,0,0,0,0,0,0,0,0,0,0,0,0,0,0,0,0,0,0,0,0,0,0,0,0,0,0,0,0,0,0,0,0,0,0,0,0,0,0,0,0,0,0,0,0,0,0,0,0,0,0,0,0,0,0,0,0,0,0,0,0,0,0,0,0,0,0,0,0…	-	-	-	-	-
469	TIDP5346	mu	IDP739	chr01	131.2	0	Co-Dominant	TGCE	ISU Map7	1,0,0,0,1,0,2,2,0,2,0,2,0,1,1,1,2,0,0,1,2,1,1,2,0,2,2,2,1,2,0,1,1,1,0,0,2,2,0,0,1,0,1,2,0,1,1,1,0,1,1,0,2,1,0,1,2,0,1,0,0,1,1,0,0,0,0,0,1,1,1,2,0,1,0,0,0,0,0,0,0,0,0,0,0,0,0,0,0,0,0,0,0,0,0,0,0,0,0,0,0,0,0,0,0,0,0,0,0,0,0,0,0,0,0,0,0,0,0,0,0,0,0,0,0,0,0,0,0,0,0,0,0,0,0,0,0,0,0,0,0,0,0,0,0,0,0,0,0,0,0,0,0,0,0,0,0,0,0,0,0,0,0,0,0,0,0,0,0,0,0,0,0,0,0,0,0,0,0,0,0,0,0,0,0,0,0,0,0,0,0,0,0,0,0,0,0,0,0,0…	MAGIv3.1_12980	MAGIv3.1_12980	chr01	63053770	Consistent
470	umc1917	mu	IDP739	chr01	131.2	0	-	-	MMP	1,0,1,0,1,0,2,2,1,2,1,2,1,1,1,1,2,1,2,1,2,1,1,2,2,2,2,2,1,2,2,0,1,1,2,1,2,0,1,2,1,1,1,2,1,1,1,1,0,1,1,1,2,1,1,1,2,1,1,0,0,1,1,1,0,0,1,0,1,1,1,2,0,1,1,2,2,2,0,1,1,1,2,1,1,1,2,1,2,2,2,1,0,2,1,0,0,2,2,0,2,1,1,1,1,1,2,0,2,1,0,2,0,2,2,1,2,2,2,1,1,1,1,2,1,2,1,1,1,1,0,2,1,1,1,0,2,1,2,2,0,0,1,1,1,1,0,1,1,0,2,2,1,0,2,1,2,2,2,2,0,1,1,0,2,0,0,2,1,1,1,1,2,1,1,2,2,2,1,1,2,2,2,2,1,1,1,1,2,0,2,2,1,2,1,1,0,1,1,0…	CC787174,CC747030,CC787173,G68079,CC747031	-	-	-	-
471	asg30b	mu	IDP739	chr01	131.2	0.4	-	-	MMP	1,0,1,0,1,0,2,2,1,2,1,2,1,1,1,1,2,1,2,1,2,1,1,2,2,2,2,2,1,2,2,1,1,1,2,1,2,2,1,1,1,1,1,0,1,1,1,1,0,1,1,1,2,1,1,1,2,1,2,0,0,1,1,1,0,0,2,0,1,1,1,2,0,1,1,2,2,2,0,2,1,1,2,2,1,1,1,1,2,2,2,0,0,1,1,0,0,2,2,0,1,1,1,1,1,2,0,0,1,2,2,2,0,2,1,2,2,2,1,1,1,0,0,0,0,2,1,1,1,1,0,2,1,1,1,0,2,1,2,2,0,0,1,1,1,1,0,2,1,0,2,2,1,0,2,1,0,0,2,2,0,1,2,1,2,0,0,2,1,1,1,1,2,1,1,2,0,2,1,1,2,2,0,0,1,1,1,1,2,0,2,2,1,2,1,1,0,1,1,0…	-	-	-	-	-
472	TIDP3368	mu	IDP739	chr01	131.2	0.4	Co-Dominant	TGCE	ISU Map7	1,0,0,0,1,0,2,2,0,2,0,2,0,1,1,1,2,0,0,1,2,1,1,2,0,2,0,2,1,2,2,1,1,1,0,0,2,2,0,0,1,0,1,2,0,1,1,1,0,1,1,0,2,1,0,1,2,0,2,0,0,1,2,0,0,0,0,0,1,1,1,2,0,1,0,0,0,0,0,0,0,0,0,0,0,0,0,0,0,0,0,0,0,0,0,0,0,0,0,0,0,0,0,0,0,0,0,0,0,0,0,0,0,0,0,0,0,0,0,0,0,0,0,0,0,0,0,0,0,0,0,0,0,0,0,0,0,0,0,0,0,0,0,0,0,0,0,0,0,0,0,0,0,0,0,0,0,0,0,0,0,0,0,0,0,0,0,0,0,0,0,0,0,0,0,0,0,0,0,0,0,0,0,0,0,0,0,0,0,0,0,0,0,0,0,0,0,0,0,0…	MAGIv3.1_266	MAGIv3.1_266	chr01	60157612	Consistent
473	gnp_QAM25d03	mu	IDP739	chr01	131.2	1.2	-	-	Genoplante Map	1,0,0,0,1,0,2,2,0,2,0,2,0,1,1,1,2,0,0,1,2,1,1,2,0,2,2,2,1,2,2,1,1,1,0,0,2,0,0,0,0,0,1,2,0,0,1,1,0,1,1,0,0,1,0,1,2,0,0,0,0,1,2,0,0,0,0,0,1,1,0,2,0,0,0,0,0,0,0,0,0,0,0,0,0,0,0,0,0,0,0,0,0,0,0,0,0,0,0,0,0,0,0,0,0,0,0,0,0,0,0,0,0,0,0,0,0,0,0,0,0,0,0,0,0,0,0,0,0,0,0,0,0,0,0,0,0,0,0,0,0,0,0,0,0,0,0,0,0,0,0,0,0,0,0,0,0,0,0,0,0,0,0,0,0,0,0,0,0,0,0,0,0,0,0,0,0,0,0,0,0,0,0,0,0,0,0,0,0,0,0,0,0,0,0,0,0,0,0,0…	CD984770	CD984770	chr01	60015049	Consistent
474	MAGI_41698	mu	IDP739	chr01	131.2	0.3	-	SNP	ISU SNP Map	1,2,0,1,1,1,2,2,0,2,1,2,1,1,1,1,2,0,0,1,2,1,1,2,2,2,2,2,1,2,2,1,1,1,0,0,2,2,0,0,1,1,1,2,1,1,1,1,1,1,1,1,2,1,1,1,2,0,0,1,1,1,1,0,2,1,2,0,0,1,1,2,1,1,1,2,0,2,1,1,1,0,2,1,1,1,2,2,2,2,2,1,1,2,1,1,1,2,2,2,2,1,0,1,1,1,2,2,2,0,2,1,2,2,2,1,2,2,0,1,1,1,1,2,0,0,1,2,1,1,1,2,0,1,0,2,2,1,2,0,2,2,1,1,0,1,2,2,1,1,2,0,1,1,2,1,2,0,0,0,2,2,0,1,1,1,1,2,1,0,0,0,2,0,1,2,2,0,1,1,2,2,2,2,1,1,2,1,0,1,2,1,1,2,1,2,1,1,1,2…	MAGIv3.1_41698	MAGIv3.1_41698	chr01	60281390	Consistent
475	MAGI_61494	mu	IDP739	chr01	131.2	1.1	-	SNP	ISU SNP Map	1,2,0,1,1,1,2,2,0,2,1,2,1,1,1,1,2,0,0,1,2,1,1,2,2,2,2,2,1,2,2,1,1,0,0,0,2,2,0,0,1,1,1,2,1,1,1,1,1,1,1,1,2,1,1,1,2,0,0,1,1,1,1,0,1,1,2,0,0,1,1,2,1,1,1,2,0,2,1,1,1,0,2,1,1,1,2,2,2,2,2,1,1,2,1,1,1,2,2,2,2,1,0,1,1,1,2,2,2,0,2,0,2,2,2,1,2,2,0,1,1,1,1,2,0,0,1,2,1,1,1,2,0,1,0,2,2,1,2,0,2,2,1,1,0,1,2,2,1,1,2,0,1,1,2,1,2,0,0,0,2,2,0,1,1,1,1,2,1,0,0,0,2,0,1,2,2,0,1,1,2,2,2,2,1,1,2,1,0,1,2,1,1,2,1,1,1,1,1,2…	MAGIv3.1_61494	MAGIv3.1_61494	chr01	60543243	Consistent
476	MAGI_55025	mu	IDP739	chr01	131.2	0	-	SNP	ISU SNP Map	1,2,0,1,1,1,2,2,0,2,1,2,1,1,1,1,0,0,0,1,0,1,1,2,2,2,2,2,1,2,2,1,1,1,0,0,2,2,0,0,1,1,1,2,1,1,1,1,1,1,1,1,2,1,1,1,2,0,0,1,1,1,1,0,1,1,2,0,0,1,1,2,1,1,1,2,0,2,1,1,1,0,2,1,1,1,2,2,2,2,2,1,1,2,1,1,1,2,0,2,2,1,0,1,1,1,2,2,2,0,2,0,2,2,2,1,2,2,0,1,1,1,1,2,0,0,1,2,1,1,1,2,0,1,0,2,2,1,2,0,2,2,1,1,0,1,2,2,1,1,2,0,1,1,2,1,2,0,0,0,2,2,0,1,1,1,1,2,1,0,0,0,2,0,1,2,2,0,1,1,2,2,2,2,1,1,2,1,0,1,2,1,1,2,1,1,1,1,1,2…	MAGIv3.1_55025	MAGIv3.1_55025	chr01	60330722	Consistent
477	MAGI_41673	mu	IDP739	chr01	131.2	1.9	-	SNP	ISU SNP Map	1,2,0,1,1,1,2,2,0,2,1,2,1,1,1,1,1,0,0,1,2,1,1,2,2,0,2,2,1,2,2,2,1,1,0,0,2,2,0,0,1,1,1,2,1,1,1,1,1,1,1,1,2,1,1,1,2,0,0,1,1,1,1,0,1,1,0,0,0,1,1,2,1,1,1,2,0,2,1,1,1,0,2,1,1,1,2,1,0,2,2,1,1,2,1,1,1,2,2,2,2,1,0,1,1,1,2,2,2,0,2,1,2,2,2,1,2,0,0,1,1,1,1,2,0,0,1,2,1,1,1,2,0,1,0,2,2,1,2,0,2,2,1,1,0,1,2,2,1,1,2,0,2,1,0,1,2,0,0,0,2,2,0,1,1,1,1,2,1,0,0,0,2,0,1,2,2,0,1,1,2,0,2,2,1,1,2,1,0,1,2,1,1,2,1,1,1,1,1,2…	MAGIv3.1_41673	MAGIv3.1_41673	chr01	61694243	Consistent
478	IDP8075	mu	IDP739	chr01	131.2	0.7	Co-Dominant	Size	ISU Map7	1,2,0,1,1,1,2,2,0,2,1,2,1,1,1,1,2,0,0,1,2,1,1,2,2,2,2,1,2,2,2,1,1,2,0,0,2,2,0,1,1,1,2,1,1,1,1,1,1,1,0,1,2,1,1,1,2,0,0,1,1,1,1,0,1,1,1,1,0,1,1,2,1,1,1,2,0,2,1,1,1,0,2,1,1,1,2,1,2,2,2,1,1,2,1,1,1,2,2,2,2,1,0,1,1,1,2,2,2,0,2,2,2,2,2,1,2,2,0,1,1,1,1,2,0,0,1,2,1,1,1,2,0,1,0,2,2,1,0,0,2,2,1,1,2,1,2,2,1,1,2,0,1,1,2,1,2,0,0,0,2,2,0,1,1,1,1,2,1,0,0,0,2,0,1,2,2,0,1,1,2,2,2,2,1,1,2,1,0,1,2,1,1,2,2,1,1,1,1,2…	MAGIv4.0_88549	-	-	-	-
479	IDP182	sk	-	chr01	132.9	0	Co-Dominant	Size	ISU Map7	1,2,1,1,1,1,2,0,0,2,1,2,1,1,1,1,2,0,0,1,2,1,1,0,2,2,2,2,1,2,2,2,1,1,0,0,2,2,0,2,1,1,1,2,1,1,1,1,1,1,1,1,2,1,1,1,2,0,0,1,1,1,1,0,1,1,1,1,0,0,1,2,1,1,1,2,0,2,1,1,1,0,2,1,1,1,2,1,2,2,2,1,1,2,1,1,1,2,2,2,2,1,0,1,1,1,2,2,2,0,2,2,2,2,2,1,2,2,0,1,1,1,1,2,0,0,1,2,1,1,1,2,0,1,0,2,2,1,2,0,2,2,1,1,0,1,2,0,1,1,2,0,1,1,2,1,2,0,0,0,2,2,0,1,1,1,1,2,1,0,0,0,2,0,1,2,2,0,1,1,2,2,2,2,1,1,2,1,0,1,2,1,1,2,0,1,1,1,1,2…	MAGIv3.1_41428	MAGIv3.1_41428	chr01	61761758	Consistent
480	IDP585	mu	IDP182	chr01	132.9	0.9	Dominant	+/-	ISU Map7	1,2,1,1,1,1,2,1,0,2,1,2,1,1,1,1,2,0,0,1,2,1,1,2,2,2,2,2,1,2,2,2,1,1,0,0,2,2,0,2,1,1,1,2,1,1,1,1,1,1,1,1,2,1,1,1,2,0,0,1,1,1,1,0,1,1,1,1,0,2,1,2,1,1,1,2,0,2,1,1,1,0,2,1,1,1,2,1,2,2,2,1,1,2,1,1,1,2,2,2,2,1,0,1,1,1,2,2,2,0,2,2,2,2,2,1,2,2,0,1,1,1,1,2,0,0,1,2,1,1,1,2,0,1,0,2,2,1,2,0,2,2,1,1,1,1,2,1,1,1,2,0,1,1,2,1,2,0,0,0,2,2,0,1,1,1,1,2,1,0,0,0,2,0,1,2,2,0,1,1,2,2,2,2,1,1,2,1,0,1,2,1,1,2,1,1,1,1,1,2…	BM073183	BM073183	chr01	62204966	Consistent
481	IDP7708	mu	IDP182	chr01	132.9	0.9	Dominant	+/-	ISU Map7	1,2,2,1,1,1,2,1,0,2,1,2,1,1,1,1,2,0,0,1,2,1,1,2,2,2,2,2,1,2,2,2,1,1,0,0,2,2,0,2,1,1,1,2,1,1,1,1,2,1,1,1,2,1,1,1,2,0,0,1,1,1,1,0,1,1,1,1,0,1,1,2,1,1,1,2,0,2,1,1,1,0,2,1,1,1,2,1,2,2,2,1,1,2,1,1,1,2,2,2,2,1,0,1,1,1,2,2,2,0,2,2,2,2,2,1,2,2,0,1,1,1,1,2,0,0,1,2,1,1,1,2,0,1,0,2,2,1,2,0,2,2,1,1,1,1,2,1,1,1,2,0,1,1,2,1,2,0,2,2,2,2,0,1,1,1,1,2,1,0,0,0,2,0,1,2,2,0,1,1,2,2,1,1,1,1,2,1,0,1,2,1,1,2,1,1,2,1,1,2…	MAGIv3.1_10387	MAGIv3.1_10387	chr01	62978406	Consistent
482	IDP7882	mu	IDP182	chr01	132.9	1.2	Dominant	+/-	ISU Map7	1,2,2,1,1,1,2,1,0,2,1,2,1,1,1,1,2,0,0,1,2,1,1,2,2,2,2,2,1,2,2,2,1,1,0,0,2,2,0,2,2,1,1,2,1,1,1,1,1,1,2,1,2,1,1,1,2,0,0,1,1,1,1,0,1,1,1,1,0,1,1,2,1,1,1,2,0,2,1,1,1,0,2,1,1,1,2,1,2,2,2,1,1,2,1,1,1,2,2,2,2,1,0,1,1,1,2,2,2,0,2,2,2,2,2,1,2,2,0,1,1,1,1,2,0,0,1,2,1,1,1,2,0,1,0,2,2,1,2,0,2,2,1,1,1,1,2,1,1,1,2,0,1,1,2,1,2,0,0,0,2,2,0,2,1,1,1,2,1,0,0,0,2,0,1,2,2,0,1,1,2,2,1,2,1,1,1,1,0,1,2,1,1,2,1,1,1,1,1,2…	MAGIv3.1_13734	MAGIv3.1_13734	chr01	63634653	Consistent
483	IDP7938	mu	IDP182	chr01	132.9	0.6	Dominant	+/-	ISU Map7	1,2,2,1,1,1,2,1,0,2,1,2,1,1,1,1,2,0,0,1,2,1,1,2,2,2,2,2,1,2,2,2,1,1,0,0,2,2,0,2,1,1,1,2,1,1,1,1,1,1,1,1,2,1,1,1,2,0,0,1,1,1,1,0,1,1,1,1,0,1,1,2,1,1,1,2,0,2,1,1,1,0,1,1,1,1,2,1,2,2,2,1,1,2,1,1,1,2,2,2,2,1,0,1,1,1,2,2,2,0,2,2,2,2,2,1,2,2,0,1,1,1,1,2,0,0,1,2,1,1,1,2,0,1,0,2,2,1,2,0,2,2,1,1,1,1,2,1,1,1,2,0,1,1,2,1,2,0,2,2,2,2,0,2,1,1,1,2,1,0,0,0,2,0,1,2,2,0,1,1,2,2,2,2,1,1,2,1,0,1,2,1,1,2,1,1,1,1,1,2…	MAGIv3.1_18822	MAGIv3.1_18822	chr01	64103611	Consistent
484	IDP1411	mu	IDP182	chr01	132.9	0.3	Co-Dominant	Size	ISU Map7	1,2,0,1,1,1,2,1,0,2,1,2,1,1,1,1,2,0,0,1,2,1,1,2,2,2,2,2,1,2,2,2,1,1,0,0,2,2,0,2,2,1,1,2,1,1,1,1,1,1,1,1,2,1,1,1,2,0,0,1,1,1,1,0,1,1,1,1,0,1,1,2,1,1,1,2,0,2,1,1,1,0,2,1,1,1,2,1,2,2,2,1,1,2,1,1,1,2,2,2,2,1,0,1,1,1,2,2,2,0,2,2,2,2,2,1,2,2,0,1,1,1,1,2,0,0,1,2,1,1,1,2,0,1,0,2,2,1,2,0,2,2,1,1,1,1,2,1,1,1,2,0,1,1,2,1,2,0,0,0,2,2,0,2,1,1,1,2,1,0,0,0,2,0,1,2,2,0,1,1,2,2,2,2,1,1,2,1,0,1,2,1,1,2,1,1,1,1,1,2…	MAGIv3.1_23951	MAGIv3.1_23951	chr01	63912989	Consistent
485	MAGI_23951	mu	IDP182	chr01	132.9	3.2	-	SNP	ISU SNP Map	1,2,0,1,1,1,2,2,0,2,1,2,1,1,1,1,2,0,0,1,2,1,1,0,2,2,2,2,1,2,2,2,1,1,0,0,2,2,0,0,2,1,1,2,1,1,1,1,1,1,1,1,2,1,1,1,2,0,0,1,1,1,1,0,1,1,1,0,0,1,1,2,1,1,1,2,0,2,1,1,1,0,2,1,1,1,2,1,2,2,2,1,1,2,1,1,1,2,2,2,2,1,0,1,1,1,2,2,2,0,2,0,2,2,2,1,2,2,0,1,1,1,1,2,0,0,1,2,1,1,1,2,0,1,0,2,2,1,2,0,2,2,1,1,0,1,2,0,1,1,2,0,1,1,2,1,2,0,0,0,2,0,0,2,1,1,1,2,1,0,0,0,2,0,1,2,2,0,1,1,2,0,2,2,1,1,2,1,0,1,2,1,1,2,1,1,1,1,1,2…	MAGIv3.1_23951	MAGIv3.1_23951	chr01	63912989	Consistent
486	AY110330	mu	IDP182	chr01	132.9	1.2	-	-	MMP	1,0,1,0,1,0,2,2,1,2,1,2,1,1,1,1,2,1,2,0,2,1,1,2,2,0,0,2,1,2,2,2,1,1,2,1,2,2,1,2,1,1,1,2,1,1,1,1,0,1,1,0,2,1,0,1,2,1,1,0,0,1,1,1,0,0,1,0,1,1,1,2,0,1,1,2,2,2,0,1,1,1,2,1,0,1,2,1,2,2,2,1,0,2,1,0,0,2,2,0,2,1,1,1,1,1,2,0,2,1,0,2,0,2,2,1,2,2,2,1,1,2,2,1,0,0,2,2,2,2,0,1,2,0,0,0,0,2,1,1,1,0,2,2,0,1,0,0,1,0,2,2,1,0,2,0,2,2,2,2,0,0,2,2,2,0,0,2,1,1,1,0,2,1,1,2,2,2,1,1,2,2,2,2,1,1,1,0,2,0,2,2,0,0,1,1,0,1,0,0…	BE123195,AI947728,AY110330,CC759160,AC204380,CC759159,BM073183,BE129783,BE643624,BE056171	AI947728,AY110330,BM073183,BE129783	chr01	62205606	Consistent
487	gnp_QBJ4e05	mu	IDP182	chr01	132.9	1.9	-	-	Genoplante Map	0,0,0,0,1,0,2,2,0,2,0,2,0,1,1,1,2,0,0,1,2,1,1,2,0,2,2,2,1,2,2,2,1,1,0,0,2,0,0,0,0,0,1,2,0,0,2,1,0,1,1,0,0,1,0,1,2,0,0,0,0,1,1,0,0,0,0,0,1,1,0,2,0,0,0,0,0,0,0,0,0,0,0,0,0,0,0,0,0,0,0,0,0,0,0,0,0,0,0,0,0,0,0,0,0,0,0,0,0,0,0,0,0,0,0,0,0,0,0,0,0,0,0,0,0,0,0,0,0,0,0,0,0,0,0,0,0,0,0,0,0,0,0,0,0,0,0,0,0,0,0,0,0,0,0,0,0,0,0,0,0,0,0,0,0,0,0,0,0,0,0,0,0,0,0,0,0,0,0,0,0,0,0,0,0,0,0,0,0,0,0,0,0,0,0,0,0,0,0,0…	CX129511	CX129511	chr01	61760709	Consistent
488	IDP6891	mu	IDP182	chr01	132.9	0.4	Dominant	+/-	ISU Map7	0,0,0,1,1,1,2,1,0,2,1,2,1,1,1,1,2,0,0,1,2,1,1,2,2,2,2,2,1,2,2,1,1,1,0,0,2,2,0,2,2,1,1,2,1,1,2,1,1,1,1,1,2,1,1,1,2,0,0,1,1,1,1,0,1,1,1,1,0,1,1,2,2,1,1,2,0,2,1,1,1,0,1,1,1,1,2,1,2,2,2,1,1,2,1,1,1,2,2,2,2,1,0,1,1,2,2,2,2,0,2,2,2,2,2,1,2,2,0,1,1,1,1,2,0,0,1,2,1,1,1,2,0,1,0,2,2,1,2,0,2,2,1,1,1,1,2,1,1,1,2,0,1,1,2,1,2,0,2,2,2,2,0,2,1,2,1,2,1,0,0,0,2,0,1,2,2,0,1,1,2,2,2,2,1,1,2,1,0,1,2,1,1,2,1,1,1,1,1,2…	MAGIv3.1_35490	MAGIv3.1_35490	chr01	68323092	Consistent
489	IDP7004	mu	IDP182	chr01	132.9	0.6	Dominant	+/-	ISU Map7	1,2,2,1,1,1,2,1,0,2,1,2,1,1,1,1,2,0,0,1,2,1,1,2,2,2,2,2,1,2,2,1,1,1,0,0,2,2,0,2,2,1,1,2,1,1,2,1,1,1,1,1,2,1,1,1,2,0,0,1,1,1,1,0,1,1,1,1,0,1,2,2,2,1,1,2,0,2,1,1,1,0,1,1,1,1,2,1,2,2,2,1,1,2,1,1,1,2,2,2,2,1,0,1,1,1,2,2,2,0,2,2,2,2,2,1,2,2,0,1,1,1,1,2,0,0,1,2,1,1,1,2,0,1,0,2,2,1,2,0,2,2,1,1,1,1,2,1,1,1,2,0,1,1,2,1,2,0,2,2,2,2,0,2,1,2,1,2,1,0,0,0,2,0,1,2,2,0,1,1,2,2,2,2,1,1,2,1,0,1,2,1,1,2,1,1,1,1,1,2…	ZMMBBb0464F07.R	ZMMBBb0464F07.R	chr01	67951619	Consistent
490	IDP3943	mu	IDP182	chr01	132.9	0.6	Dominant	+/-	ISU Map7	1,2,2,1,1,1,2,1,0,2,1,2,1,1,1,1,2,0,0,1,2,1,1,2,2,2,2,2,1,2,2,1,1,1,0,0,2,2,0,2,1,1,1,2,1,1,2,1,1,1,1,1,2,1,1,1,2,0,0,1,1,1,1,0,1,1,1,1,0,1,2,2,2,1,1,2,0,2,1,1,1,0,1,1,1,1,2,1,2,2,2,1,1,2,1,1,1,2,2,2,2,1,0,1,1,1,2,2,2,0,2,2,2,2,2,1,2,2,0,1,1,1,1,2,0,0,1,2,1,1,1,2,0,1,0,2,2,1,2,0,2,2,1,1,1,1,2,1,1,1,2,0,1,1,2,1,2,0,0,0,2,2,0,1,1,2,1,2,1,0,0,0,2,0,1,2,2,0,1,1,2,2,1,2,1,1,2,1,0,1,2,1,1,2,1,1,1,1,1,2…	MAGIv3.1_2564	MAGIv3.1_2564	chr01	66722910	Consistent
491	IDP6736	mu	IDP182	chr01	132.9	1.3	Co-Dominant	Size	ISU Map7	1,2,0,1,1,1,2,1,0,2,1,2,1,1,1,1,2,0,0,1,2,1,1,2,2,2,2,2,1,2,2,1,1,1,0,0,2,2,0,2,1,1,1,2,1,1,2,1,1,1,1,1,2,1,1,1,2,0,0,1,1,1,1,0,1,1,1,1,0,1,1,2,2,1,1,2,0,2,1,1,1,0,1,1,1,1,2,1,2,2,2,1,1,2,1,1,1,2,2,2,2,1,0,1,1,1,2,2,2,0,2,2,2,2,2,1,2,2,0,1,1,1,1,2,0,0,1,2,1,1,1,2,0,1,0,2,2,1,2,0,2,2,1,1,1,1,2,1,1,1,2,0,1,1,2,1,2,0,0,0,2,2,0,1,1,1,1,2,1,0,0,0,2,0,1,2,2,0,1,1,2,2,2,2,1,1,2,1,0,1,2,1,1,2,1,1,1,1,1,2…	MAGIv3.1_5377	MAGIv3.1_5377	chr01	67268672	Consistent
492	IDP7237	mu	IDP182	chr01	132.9	0.9	Dominant	+/-	ISU Map7	1,2,0,1,1,1,2,1,0,2,1,0,1,1,1,2,2,0,0,1,2,1,1,2,2,2,2,2,1,2,2,1,1,1,0,0,2,2,0,2,2,1,1,2,1,1,1,1,1,1,1,1,2,1,1,1,2,0,0,1,1,1,1,0,1,1,1,1,0,1,1,2,1,1,1,2,0,2,1,1,1,0,1,1,1,2,2,1,2,2,2,1,1,2,1,1,1,2,2,2,2,1,0,1,1,1,2,2,2,0,2,2,2,2,2,1,2,2,0,1,1,1,1,2,0,0,1,2,1,1,1,2,0,1,0,2,2,1,2,0,2,2,1,1,1,1,2,1,1,1,2,0,1,1,2,1,2,0,0,0,2,2,0,2,1,2,1,2,1,0,0,0,2,0,1,2,2,0,1,1,2,2,2,2,1,1,2,1,0,1,2,1,1,2,1,1,1,1,1,2…	MAGIv3.1_111558	-	-	-	-
493	MAGI_75315	mu	IDP182	chr01	132.9	0.7	-	SNP	ISU SNP Map	1,2,0,1,1,1,2,2,0,2,1,2,1,1,1,0,2,0,0,1,2,1,1,2,2,2,2,2,1,2,2,1,1,1,0,0,2,2,0,0,2,1,1,2,1,1,1,1,1,1,1,1,2,1,1,1,2,0,0,1,1,1,1,0,1,1,1,0,0,2,1,2,1,1,1,2,0,2,1,1,1,0,1,1,1,1,2,1,2,2,2,1,1,2,1,1,1,2,2,2,2,1,0,1,1,1,2,2,2,0,2,2,2,2,2,1,2,2,0,1,1,1,1,2,0,0,1,2,1,1,1,2,0,1,0,2,2,1,2,0,2,2,1,1,0,1,2,0,1,1,2,0,1,1,2,1,2,0,0,0,2,2,0,2,1,2,1,2,1,0,0,0,2,0,1,2,2,0,1,1,2,0,2,2,1,1,2,1,0,1,2,1,1,2,1,1,1,1,1,2…	MAGIv3.1_75315	MAGIv3.1_75315	chr01	65646624	Consistent
494	MAGI_2500	mu	IDP182	chr01	132.9	0.8	-	SNP	ISU SNP Map	1,2,0,1,1,1,2,2,0,2,1,2,1,1,1,0,2,0,0,1,2,1,1,2,2,2,2,2,1,2,2,2,1,1,0,0,2,2,0,0,1,1,1,2,1,1,1,1,1,1,1,1,2,1,1,1,2,0,0,1,1,1,1,0,1,1,1,0,0,2,1,2,1,1,1,2,0,2,1,1,1,0,1,1,1,1,2,1,2,2,2,1,1,2,1,1,1,2,2,2,2,1,0,1,1,1,2,2,2,0,2,0,2,2,2,1,2,2,0,1,1,1,1,2,0,0,1,2,1,1,1,2,0,1,0,2,2,1,2,0,2,2,1,1,0,1,2,0,1,1,2,0,1,1,2,1,2,0,0,0,2,2,0,1,1,2,1,2,1,0,0,0,2,0,1,2,2,0,1,1,2,0,2,2,2,1,2,1,0,1,2,1,1,2,1,1,1,1,1,2…	MAGIv3.1_2500	MAGIv3.1_2500	chr01	65059077	Consistent
495	MAGI_35490	mu	IDP182	chr01	132.9	0.9	-	SNP	ISU SNP Map	1,2,0,1,1,1,2,2,0,2,1,2,1,1,1,1,2,0,0,1,2,1,1,2,2,2,2,2,1,2,2,1,1,1,0,0,2,2,0,0,1,1,1,2,0,1,2,1,1,1,1,1,2,1,1,1,2,0,0,1,1,1,1,0,1,1,1,0,0,2,1,2,2,1,1,2,0,2,1,1,1,0,1,1,1,1,2,1,2,2,2,1,1,2,1,1,1,2,2,2,2,1,0,0,1,1,2,2,2,0,2,0,2,2,2,1,2,2,0,1,1,1,1,2,0,0,1,2,1,1,1,2,0,1,0,2,2,1,2,0,2,2,1,1,0,1,2,0,1,1,2,0,1,1,2,1,2,0,0,0,2,2,0,1,1,2,1,2,1,0,0,0,2,0,1,2,2,0,1,1,2,0,2,2,1,1,2,1,0,1,2,1,1,2,1,1,1,1,1,2…	MAGIv3.1_35490	MAGIv3.1_35490	chr01	68323092	Consistent
496	IDP2553	mu	IDP182	chr01	132.9	0.3	Dominant	-/+	ISU Map7	1,2,0,1,1,1,2,2,0,2,1,2,1,1,1,1,2,0,0,1,2,1,1,2,2,2,2,2,1,2,2,1,1,1,0,0,2,2,0,2,2,1,1,2,1,1,2,1,1,1,1,1,2,1,1,1,2,0,0,1,1,1,1,0,1,1,1,1,0,2,1,2,2,1,1,2,0,2,1,1,1,0,1,1,1,1,2,1,2,2,2,1,1,2,1,1,1,2,2,2,2,1,0,1,1,1,2,2,2,0,2,2,2,2,2,1,2,2,0,1,1,1,1,2,0,0,1,2,1,1,1,2,0,1,0,2,2,1,2,0,2,2,1,1,2,1,2,2,1,1,2,0,1,1,2,1,2,0,0,0,2,2,0,2,1,2,1,2,1,0,0,0,2,0,1,2,2,0,1,1,2,2,2,2,1,1,2,1,0,1,2,1,1,2,2,1,1,1,1,2…	MEC_24109_P95-Mar06	MEC_24109_P95-Mar06	chr01	68245687	Consistent
497	IDP5914	sk	-	chr01	134.4	0	Co-Dominant	Size	ISU Map7	1,2,0,1,1,1,2,0,0,2,1,2,1,1,1,1,2,0,0,1,2,1,1,2,2,2,2,2,1,2,2,1,1,1,0,0,2,2,0,2,0,1,1,2,1,1,2,1,1,1,1,1,2,1,1,1,2,0,0,1,1,1,1,0,1,1,1,1,0,2,2,2,2,1,1,2,0,2,1,1,1,0,1,1,1,1,2,1,2,2,2,1,1,2,1,1,1,2,2,2,2,1,0,1,1,1,2,2,2,0,2,2,2,2,2,1,2,2,0,1,1,1,1,2,0,0,1,2,1,1,1,2,0,1,0,2,2,1,2,0,2,2,1,1,0,1,2,0,1,1,2,0,1,1,2,1,2,0,0,0,2,2,0,0,1,2,1,2,1,0,0,0,2,0,1,2,2,0,1,1,2,2,2,2,1,1,2,1,0,1,2,1,1,2,0,1,1,1,1,2…	MAGIv3.1_82146	MAGIv3.1_82146	chr01	66734196	Consistent
498	IDP7576	mu	IDP5914	chr01	134.4	1.3	Co-Dominant	Size	ISU Map7	1,2,0,2,2,1,2,2,0,2,1,2,1,1,1,1,2,0,0,1,2,2,1,2,2,2,2,2,1,2,2,1,1,1,0,0,2,2,0,2,2,1,1,2,1,1,2,1,1,1,1,1,2,1,1,1,2,0,0,1,1,1,2,0,1,1,1,1,0,2,2,2,2,1,1,2,0,2,1,1,1,0,1,1,1,1,2,1,2,2,2,1,1,2,2,1,1,2,2,2,2,1,0,1,1,1,2,2,2,0,2,2,2,2,2,1,2,2,0,1,1,1,1,2,0,0,1,2,1,1,1,2,0,1,0,2,2,1,2,0,2,2,1,1,1,2,2,2,1,1,2,0,1,1,0,1,2,0,0,0,2,2,0,2,1,2,2,2,1,0,0,0,2,0,1,2,2,0,1,1,2,2,2,2,1,1,2,1,0,1,2,1,1,2,1,2,1,1,1,2…	MAGIv3.1_54526	MAGIv3.1_54526	chr01	69867193	Consistent
499	TIDP5402	mu	IDP5914	chr01	134.4	0.4	Co-Dominant	TGCE	ISU Map7	1,0,0,0,1,0,0,2,0,2,0,2,0,1,1,1,2,0,0,1,2,1,1,2,0,2,2,2,1,2,2,1,1,1,0,0,2,2,0,0,0,0,1,2,0,1,2,1,0,1,1,0,2,1,0,1,2,0,1,0,0,1,1,0,0,0,0,0,0,2,2,2,0,1,0,0,0,0,0,0,0,0,0,0,0,0,0,0,0,0,0,0,0,0,0,0,0,0,0,0,0,0,0,0,0,0,0,0,0,0,0,0,0,0,0,0,0,0,0,0,0,0,0,0,0,0,0,0,0,0,0,0,0,0,0,0,0,0,0,0,0,0,0,0,0,0,0,0,0,0,0,0,0,0,0,0,0,0,0,0,0,0,0,0,0,0,0,0,0,0,0,0,0,0,0,0,0,0,0,0,0,0,0,0,0,0,0,0,0,0,0,0,0,0,0,0,0,0,0,0…	MAGIv3.1_89326	MAGIv3.1_89326	chr01	68055309	Consistent
500	IDP6034	mu	IDP5914	chr01	134.4	0.8	Dominant	+/-	ISU Map7	1,0,0,0,1,0,2,2,0,2,0,2,0,1,1,1,2,0,0,1,2,1,1,2,0,2,2,2,1,2,2,1,1,1,0,0,2,2,0,0,1,0,1,2,0,2,2,1,0,1,1,0,2,1,0,1,2,0,1,0,0,1,1,0,0,0,0,0,1,2,2,2,0,1,0,0,0,0,0,0,0,0,0,0,0,0,0,0,0,0,0,0,0,0,0,0,0,0,0,0,0,0,0,0,0,0,0,0,0,0,0,0,0,0,0,0,0,0,0,0,0,0,0,0,0,0,0,0,0,0,0,0,0,0,0,0,0,0,0,0,0,0,0,0,0,0,0,0,0,0,0,0,0,0,0,0,0,0,0,0,0,0,0,0,0,0,0,0,0,0,0,0,0,0,0,0,0,0,0,0,0,0,0,0,0,0,0,0,0,0,0,0,0,0,0,0,0,0,0,0…	MAGIv3.1_107756	MAGIv3.1_107756	chr01	66024833	Consistent
501	gnp_QCG31a10	mu	IDP5914	chr01	134.4	1	-	-	Genoplante Map	1,0,0,0,1,0,2,2,0,0,0,2,0,1,1,1,2,0,0,1,2,1,1,2,0,0,0,0,1,2,2,1,1,1,0,0,2,0,0,0,0,0,1,2,0,0,2,1,0,1,1,0,0,1,0,1,2,0,0,0,0,1,1,0,0,0,0,0,1,2,0,2,0,0,0,0,0,0,0,0,0,0,0,0,0,0,0,0,0,0,0,0,0,0,0,0,0,0,0,0,0,0,0,0,0,0,0,0,0,0,0,0,0,0,0,0,0,0,0,0,0,0,0,0,0,0,0,0,0,0,0,0,0,0,0,0,0,0,0,0,0,0,0,0,0,0,0,0,0,0,0,0,0,0,0,0,0,0,0,0,0,0,0,0,0,0,0,0,0,0,0,0,0,0,0,0,0,0,0,0,0,0,0,0,0,0,0,0,0,0,0,0,0,0,0,0,0,0,0,0…	DN757484	-	-	-	-
502	csu207	mu	IDP5914	chr01	134.4	2.2	-	-	MMP	1,0,1,0,1,0,2,2,1,2,1,2,1,1,1,1,2,1,2,1,2,1,1,2,2,2,2,2,1,2,2,1,1,1,2,1,2,2,1,2,0,1,1,2,1,1,2,1,0,1,1,1,2,1,1,1,2,1,1,0,0,1,1,1,0,0,1,0,1,2,1,2,0,1,1,2,2,2,0,1,1,1,1,1,1,1,2,1,2,2,2,1,0,2,1,0,0,2,2,0,2,1,1,1,1,1,2,0,2,1,2,2,0,2,2,1,2,2,2,1,1,1,1,2,1,0,0,1,1,2,0,1,1,1,0,0,1,2,2,0,2,0,1,1,1,1,0,1,2,0,1,1,0,0,2,1,2,2,2,2,0,1,1,0,2,2,0,2,1,1,1,1,2,1,1,2,2,2,1,1,2,2,2,2,1,1,1,1,2,0,2,2,1,2,1,1,0,1,0,0…	-	-	-	-	-
503	TIDP6254	mu	IDP5914	chr01	134.4	1	Co-Dominant	TGCE	ISU Map7	1,0,0,0,1,0,2,2,0,2,0,2,0,1,1,1,2,0,0,1,2,1,1,2,0,2,2,2,1,2,2,1,1,1,0,0,2,2,0,0,0,0,1,2,0,1,2,1,0,1,1,0,2,1,0,1,2,0,1,0,0,1,1,0,0,0,0,0,1,2,1,2,0,1,0,0,0,0,0,0,0,0,0,0,0,0,0,0,0,0,0,0,0,0,0,0,0,0,0,0,0,0,0,0,0,0,0,0,0,0,0,0,0,0,0,0,0,0,0,0,0,0,0,0,0,0,0,0,0,0,0,0,0,0,0,0,0,0,0,0,0,0,0,0,0,0,0,0,0,0,0,0,0,0,0,0,0,0,0,0,0,0,0,0,0,0,0,0,0,0,0,0,0,0,0,0,0,0,0,0,0,0,0,0,0,0,0,0,0,0,0,0,0,0,0,0,0,0,0,0…	MAGIv3.1_26677	MAGIv3.1_26677	chr01	68313463	Consistent
504	TIDP5310	mu	IDP5914	chr01	134.4	0.4	Co-Dominant	TGCE	ISU Map7	1,0,0,0,1,0,2,2,0,2,0,2,0,1,1,1,2,0,0,1,2,1,1,2,0,2,2,2,1,2,2,1,1,1,0,0,2,2,0,0,0,0,1,2,0,1,2,1,0,1,1,0,2,1,0,1,2,0,1,0,0,1,1,0,0,0,0,0,1,2,1,2,0,1,0,0,0,0,0,0,0,0,0,0,0,0,0,0,0,0,0,0,0,0,0,0,0,0,0,0,0,0,0,0,0,0,0,0,0,0,0,0,0,0,0,0,0,0,0,0,0,0,0,0,0,0,0,0,0,0,0,0,0,0,0,0,0,0,0,0,0,0,0,0,0,0,0,0,0,0,0,0,0,0,0,0,0,0,0,0,0,0,0,0,0,0,0,0,0,0,0,0,0,0,0,0,0,0,0,0,0,0,0,0,0,0,0,0,0,0,0,0,0,0,0,0,0,0,0,0…	MAGIv3.1_102280	MAGIv3.1_102280	chr01	68316621	Consistent
505	TIDP5629	mu	IDP5914	chr01	134.4	0.4	Co-Dominant	TGCE	ISU Map7	1,0,0,0,1,0,2,2,0,2,0,2,0,1,1,1,2,0,0,1,2,1,1,2,0,2,2,2,1,2,2,1,1,1,0,0,2,2,0,0,2,0,1,2,0,1,1,1,0,1,1,0,2,1,0,1,2,0,1,0,0,1,1,0,0,0,0,0,1,2,1,2,0,0,0,0,0,0,0,0,0,0,0,0,0,0,0,0,0,0,0,0,0,0,0,0,0,0,0,0,0,0,0,0,0,0,0,0,0,0,0,0,0,0,0,0,0,0,0,0,0,0,0,0,0,0,0,0,0,0,0,0,0,0,0,0,0,0,0,0,0,0,0,0,0,0,0,0,0,0,0,0,0,0,0,0,0,0,0,0,0,0,0,0,0,0,0,0,0,0,0,0,0,0,0,0,0,0,0,0,0,0,0,0,0,0,0,0,0,0,0,0,0,0,0,0,0,0,0,0…	MAGIv3.1_85396	MAGIv3.1_85396	chr01	65489159	Consistent
506	TIDP3667	mu	IDP5914	chr01	134.4	0	Co-Dominant	TGCE	ISU Map7	1,0,0,0,1,0,2,2,0,2,0,2,0,1,1,0,2,0,0,1,2,1,1,2,0,2,0,2,1,2,2,1,1,1,0,0,2,2,0,0,2,0,1,2,0,1,1,1,0,1,1,0,2,1,0,1,2,0,1,0,0,1,1,0,0,0,0,0,0,0,1,2,0,1,0,0,0,0,0,0,0,0,0,0,0,0,0,0,0,0,0,0,0,0,0,0,0,0,0,0,0,0,0,0,0,0,0,0,0,0,0,0,0,0,0,0,0,0,0,0,0,0,0,0,0,0,0,0,0,0,0,0,0,0,0,0,0,0,0,0,0,0,0,0,0,0,0,0,0,0,0,0,0,0,0,0,0,0,0,0,0,0,0,0,0,0,0,0,0,0,0,0,0,0,0,0,0,0,0,0,0,0,0,0,0,0,0,0,0,0,0,0,0,0,0,0,0,0,0,0…	MAGIv4.0_31658	MAGIv4.0_31658	chr01	65292160	Consistent
507	TIDP2891	mu	IDP5914	chr01	134.4	0.7	Co-Dominant	TGCE	ISU Map7	0,0,0,0,1,0,2,2,0,2,0,2,0,1,1,1,2,0,0,1,2,1,1,0,0,2,2,2,1,2,2,1,1,1,0,0,2,2,0,0,0,0,1,2,0,1,1,0,0,1,1,0,2,1,0,1,2,0,1,0,0,1,1,0,0,0,0,0,1,2,1,2,0,1,0,0,0,0,0,0,0,0,0,0,0,0,0,0,0,0,0,0,0,0,0,0,0,0,0,0,0,0,0,0,0,0,0,0,0,0,0,0,0,0,0,0,0,0,0,0,0,0,0,0,0,0,0,0,0,0,0,0,0,0,0,0,0,0,0,0,0,0,0,0,0,0,0,0,0,0,0,0,0,0,0,0,0,0,0,0,0,0,0,0,0,0,0,0,0,0,0,0,0,0,0,0,0,0,0,0,0,0,0,0,0,0,0,0,0,0,0,0,0,0,0,0,0,0,0,0…	MEC_26565_P95-Mar06	-	-	-	-
508	isu41b	mu	IDP5914	chr01	134.4	0.8	-	-	Genoplante Map	1,0,0,0,1,0,2,2,0,2,0,2,0,1,1,1,2,0,0,0,2,1,1,2,0,2,2,2,1,2,2,1,1,1,0,0,2,2,0,0,1,0,1,2,0,1,1,1,0,1,1,0,2,1,0,1,2,0,1,0,0,1,1,0,0,0,0,0,1,2,1,2,0,1,0,0,0,0,0,0,0,0,0,0,0,0,0,0,0,0,0,0,0,0,0,0,0,0,0,0,0,0,0,0,0,0,0,0,0,0,0,0,0,0,0,0,0,0,0,0,0,0,0,0,0,0,0,0,0,0,0,0,0,0,0,0,0,0,0,0,0,0,0,0,0,0,0,0,0,0,0,0,0,0,0,0,0,0,0,0,0,0,0,0,0,0,0,0,0,0,0,0,0,0,0,0,0,0,0,0,0,0,0,0,0,0,0,0,0,0,0,0,0,0,0,0,0,0,0,0…	-	-	-	-	-
509	isu041b	mu	IDP5914	chr01	134.4	0	-	-	MMP	1,0,1,0,1,0,2,2,1,2,0,2,1,1,1,1,2,1,2,0,2,1,1,2,2,2,2,2,1,2,2,1,1,1,2,1,2,2,1,0,1,1,1,2,1,1,1,1,0,1,1,1,2,1,1,1,2,1,1,0,0,1,1,1,0,0,0,0,1,2,1,2,0,1,1,2,2,2,0,1,1,2,1,1,0,1,2,1,2,2,2,1,0,2,1,0,0,2,2,0,0,1,1,0,2,1,1,0,2,2,0,2,0,2,1,1,2,2,2,1,1,1,1,2,0,0,1,1,1,1,0,2,0,0,0,0,0,1,0,2,2,0,1,1,1,1,0,2,1,0,2,1,0,0,2,1,2,2,2,2,0,1,1,0,0,0,0,2,1,2,1,0,0,1,0,2,2,2,1,1,2,2,2,2,1,1,0,1,2,0,0,0,1,2,1,1,0,1,1,2…	-	-	-	-	-
510	gnp_QAM24h06d	mu	IDP5914	chr01	134.4	1.3	-	-	Genoplante Map	1,0,0,0,1,0,2,2,0,2,0,2,0,1,1,1,2,0,0,1,2,1,1,2,0,2,2,2,1,2,2,1,1,1,0,0,2,0,0,0,0,0,1,2,0,0,2,1,0,1,1,0,0,1,0,0,2,0,0,0,0,1,1,0,0,0,0,0,1,2,0,2,0,0,0,0,0,0,0,0,0,0,0,0,0,0,0,0,0,0,0,0,0,0,0,0,0,0,0,0,0,0,0,0,0,0,0,0,0,0,0,0,0,0,0,0,0,0,0,0,0,0,0,0,0,0,0,0,0,0,0,0,0,0,0,0,0,0,0,0,0,0,0,0,0,0,0,0,0,0,0,0,0,0,0,0,0,0,0,0,0,0,0,0,0,0,0,0,0,0,0,0,0,0,0,0,0,0,0,0,0,0,0,0,0,0,0,0,0,0,0,0,0,0,0,0,0,0,0,0…	CD984732	-	-	-	-
511	umc2227	mu	IDP5914	chr01	134.4	0.7	-	-	MMP	1,0,0,0,0,0,0,2,1,0,1,2,1,0,2,1,2,0,0,1,0,0,0,2,0,2,2,2,1,2,2,1,0,1,2,1,2,2,2,2,1,1,1,2,2,1,2,1,0,1,0,0,2,2,0,0,2,0,2,0,0,0,1,0,0,0,0,0,1,2,2,2,0,1,1,0,2,2,0,1,1,1,1,1,0,1,2,0,2,2,2,1,0,2,0,0,0,2,2,0,2,0,1,0,1,1,2,0,2,1,0,2,0,2,2,1,2,2,2,1,1,1,1,2,0,0,1,1,1,1,0,2,1,0,0,0,0,1,2,2,2,0,2,1,1,1,0,0,1,0,2,1,1,0,2,1,2,2,2,2,0,0,1,2,2,0,0,2,1,1,1,0,2,1,1,2,2,2,1,0,2,2,2,2,1,0,1,0,2,0,2,2,0,0,1,1,0,1,0,2…	AC205676,CC751714,CC751713,AC204615,AY107855	CC751713	chr01	65956476	Consistent
512	isu61	sk	-	chr01	135.8	0	-	-	Genoplante Map	1,0,0,0,1,0,2,2,0,2,0,2,0,1,1,1,2,0,0,0,2,1,1,2,0,2,2,2,1,2,2,1,1,1,0,0,2,2,0,0,0,0,1,2,0,1,2,1,0,1,1,0,2,1,0,1,2,0,1,0,0,1,1,0,0,0,0,0,1,2,2,2,0,1,0,0,0,0,0,0,0,0,0,0,0,0,0,0,0,0,0,0,0,0,0,0,0,0,0,0,0,0,0,0,0,0,0,0,0,0,0,0,0,0,0,0,0,0,0,0,0,0,0,0,0,0,0,0,0,0,0,0,0,0,0,0,0,0,0,0,0,0,0,0,0,0,0,0,0,0,0,0,0,0,0,0,0,0,0,0,0,0,0,0,0,0,0,0,0,0,0,0,0,0,0,0,0,0,0,0,0,0,0,0,0,0,0,0,0,0,0,0,0,0,0,0,0,0,0,0…	-	-	-	-	-
513	isu44a	sk	-	chr01	135.8	0	-	-	Genoplante Map	1,0,0,0,1,0,2,2,0,2,0,2,0,1,1,1,2,0,0,1,2,1,1,2,0,2,2,2,1,2,2,1,1,1,0,0,2,2,0,0,1,0,1,2,0,1,2,1,0,1,1,0,2,1,0,1,2,0,1,0,0,1,1,0,0,0,0,0,1,2,2,2,0,1,0,0,0,0,0,0,0,0,0,0,0,0,0,0,0,0,0,0,0,0,0,0,0,0,0,0,0,0,0,0,0,0,0,0,0,0,0,0,0,0,0,0,0,0,0,0,0,0,0,0,0,0,0,0,0,0,0,0,0,0,0,0,0,0,0,0,0,0,0,0,0,0,0,0,0,0,0,0,0,0,0,0,0,0,0,0,0,0,0,0,0,0,0,0,0,0,0,0,0,0,0,0,0,0,0,0,0,0,0,0,0,0,0,0,0,0,0,0,0,0,0,0,0,0,0,0…	-	-	-	-	-
514	uaz248a	sk	-	chr01	135.8	0	-	-	MMP	1,0,1,0,1,0,2,2,1,2,1,2,1,1,1,1,2,1,2,1,2,1,1,2,2,2,2,2,1,2,2,1,1,1,2,1,2,2,0,2,1,1,1,2,1,1,2,1,0,1,1,1,0,0,1,1,2,1,0,0,0,1,1,1,0,0,1,0,1,2,2,2,0,1,1,2,2,0,0,1,2,1,1,1,1,0,2,1,2,2,2,1,0,2,1,0,0,0,2,0,2,1,1,0,1,1,2,0,2,1,2,0,0,2,0,1,0,0,2,0,1,1,0,2,1,0,1,1,1,1,0,2,1,0,1,0,2,1,2,2,0,0,1,1,1,1,0,1,1,0,2,1,1,0,2,1,2,2,2,2,0,1,1,0,2,2,0,2,1,1,1,1,2,1,1,2,2,2,1,1,2,2,2,2,1,1,1,1,2,0,2,2,1,2,1,1,0,1,1,2…	-	-	-	-	-
515	ufg77	mu	uaz248a	chr01	135.8	4.7	-	-	MMP	1,0,1,0,1,0,2,2,1,2,1,2,0,1,1,1,2,1,2,0,2,1,1,2,2,2,2,2,1,0,2,2,1,1,2,1,2,2,0,2,0,0,1,2,0,1,1,1,0,1,1,1,0,0,1,1,2,1,0,0,0,1,1,1,0,0,0,0,1,1,1,2,0,1,1,2,2,2,0,1,2,1,2,1,1,0,0,1,2,2,2,1,0,2,1,0,0,0,2,0,2,1,1,0,0,1,2,0,2,1,2,0,0,0,0,1,0,0,0,0,1,0,0,0,1,0,1,1,1,1,0,2,1,1,1,0,2,1,2,2,0,0,1,1,1,1,0,1,1,0,2,2,1,0,2,1,2,2,2,2,0,1,1,0,2,0,0,2,1,1,1,1,2,1,1,2,2,2,1,1,2,2,2,2,1,1,1,1,2,0,2,2,1,2,1,1,0,1,1,2…	BH418236	-	-	-	-
516	bnlg1811	mu	uaz248a	chr01	135.8	0.4	-	-	MMP	1,0,0,0,2,0,2,2,1,2,1,2,1,1,1,2,2,1,2,1,2,2,1,2,2,2,2,2,1,2,2,1,1,1,2,1,2,2,1,2,2,1,1,2,1,1,2,1,0,1,1,1,2,1,1,1,2,2,1,0,0,1,1,1,0,0,1,0,1,2,2,2,0,1,1,2,2,2,0,1,1,1,1,1,1,1,2,1,2,2,2,1,0,2,2,0,0,2,2,0,2,1,1,1,2,2,2,0,2,1,2,2,0,2,2,1,2,2,2,1,1,1,1,2,1,2,1,1,1,1,0,2,1,1,1,0,2,1,2,1,0,0,1,1,1,2,0,2,1,0,2,1,1,0,1,1,2,1,2,2,0,1,1,2,2,2,0,2,1,2,1,1,2,1,1,2,2,2,1,1,2,2,2,2,1,1,1,1,2,0,2,2,1,2,1,2,0,1,1,2…	CC744104	-	-	-	-
517	IDP511	mu	uaz248a	chr01	135.8	0.7	Co-Dominant	Size	ISU Map7	1,0,0,0,2,0,2,2,0,2,0,2,0,1,1,0,2,0,0,1,2,2,1,2,0,2,2,2,1,0,2,1,1,1,0,0,2,2,0,0,0,0,1,2,0,1,2,1,0,1,1,0,2,1,0,1,2,0,1,0,0,1,1,0,0,0,0,0,2,2,2,2,0,1,0,0,0,0,0,0,0,0,0,0,0,0,0,0,0,0,0,0,0,0,0,0,0,0,0,0,0,0,0,0,0,0,0,0,0,0,0,0,0,0,0,0,0,0,0,0,0,0,0,0,0,0,0,0,0,0,0,0,0,0,0,0,0,0,0,0,0,0,0,0,0,0,0,0,0,0,0,0,0,0,0,0,0,0,0,0,0,0,0,0,0,0,0,0,0,0,0,0,0,0,0,0,0,0,0,0,0,0,0,0,0,0,0,0,0,0,0,0,0,0,0,0,0,0,0,0…	MAGIv3.1_18844	MAGIv3.1_18844	chr01	69992047	Consistent
518	TIDP6222	mu	uaz248a	chr01	135.8	0.4	Co-Dominant	TGCE	ISU Map7	0,0,0,0,2,0,2,2,0,2,0,2,0,1,1,0,2,0,0,1,2,2,1,2,0,2,2,2,1,2,2,1,1,1,0,0,2,2,0,0,1,0,1,2,0,1,2,1,0,2,1,0,2,0,0,1,2,0,1,0,0,1,1,0,0,0,0,0,1,2,2,2,0,1,0,0,0,0,0,0,0,0,0,0,0,0,0,0,0,0,0,0,0,0,0,0,0,0,0,0,0,0,0,0,0,0,0,0,0,0,0,0,0,0,0,0,0,0,0,0,0,0,0,0,0,0,0,0,0,0,0,0,0,0,0,0,0,0,0,0,0,0,0,0,0,0,0,0,0,0,0,0,0,0,0,0,0,0,0,0,0,0,0,0,0,0,0,0,0,0,0,0,0,0,0,0,0,0,0,0,0,0,0,0,0,0,0,0,0,0,0,0,0,0,0,0,0,0,0,0…	MAGIv3.1_92077	MAGIv3.1_92077	chr01	69271197	Consistent
519	TIDP2882	mu	uaz248a	chr01	135.8	1.1	Co-Dominant	TGCE	ISU Map7	1,0,0,0,2,0,0,2,0,2,0,2,0,1,1,2,2,0,0,1,2,2,1,2,0,2,2,2,0,2,2,1,1,1,0,0,2,2,0,0,2,0,1,2,0,1,2,1,0,2,1,0,2,1,0,1,2,0,1,0,0,1,1,0,0,0,0,0,1,2,2,2,0,1,0,0,0,0,0,0,0,0,0,0,0,0,0,0,0,0,0,0,0,0,0,0,0,0,0,0,0,0,0,0,0,0,0,0,0,0,0,0,0,0,0,0,0,0,0,0,0,0,0,0,0,0,0,0,0,0,0,0,0,0,0,0,0,0,0,0,0,0,0,0,0,0,0,0,0,0,0,0,0,0,0,0,0,0,0,0,0,0,0,0,0,0,0,0,0,0,0,0,0,0,0,0,0,0,0,0,0,0,0,0,0,0,0,0,0,0,0,0,0,0,0,0,0,0,0,0…	MAGIv3.1_86091	MAGIv3.1_86091	chr01	68750133	Consistent
520	psb395e	mu	uaz248a	chr01	135.8	0	-	-	Genoplante Map	1,0,0,0,2,0,2,2,0,2,0,2,0,0,0,0,2,0,0,0,0,0,0,2,0,2,2,2,1,2,2,1,1,1,0,0,2,2,0,0,0,0,1,2,0,1,2,1,0,2,1,0,2,1,0,1,2,0,1,0,0,1,1,0,0,0,0,0,1,2,2,2,0,1,0,0,0,0,0,0,0,0,0,0,0,0,0,0,0,0,0,0,0,0,0,0,0,0,0,0,0,0,0,0,0,0,0,0,0,0,0,0,0,0,0,0,0,0,0,0,0,0,0,0,0,0,0,0,0,0,0,0,0,0,0,0,0,0,0,0,0,0,0,0,0,0,0,0,0,0,0,0,0,0,0,0,0,0,0,0,0,0,0,0,0,0,0,0,0,0,0,0,0,0,0,0,0,0,0,0,0,0,0,0,0,0,0,0,0,0,0,0,0,0,0,0,0,0,0,0…	-	-	-	-	-
521	ufg43	sk	-	chr01	138	0	-	-	MMP	1,0,1,0,2,0,2,2,1,2,1,2,0,1,1,2,2,1,2,0,2,2,1,2,2,2,2,2,1,0,2,1,1,1,2,1,2,2,0,2,0,1,1,2,1,1,2,1,0,2,1,1,0,0,1,1,2,1,0,0,0,1,1,1,0,0,1,0,1,2,2,2,0,1,1,2,2,2,0,1,2,1,1,1,1,0,0,1,2,2,2,1,0,2,1,0,0,0,2,0,2,1,1,0,0,2,2,0,2,1,2,0,0,2,0,1,0,0,0,0,1,1,0,0,1,0,1,1,1,1,0,2,1,1,1,0,2,1,2,1,0,0,1,1,1,2,0,1,1,0,2,1,1,0,1,1,2,1,2,2,0,1,1,2,2,2,0,2,1,2,1,1,2,1,1,2,2,2,1,1,2,2,2,2,1,1,1,1,2,0,2,2,1,2,1,2,0,1,1,2…	BH417752	-	-	-	-
522	bnl9.11b	sk	-	chr01	141.7	0	-	-	MMP	1,0,1,0,2,0,2,2,1,2,1,2,1,1,1,2,2,1,2,1,1,2,2,2,2,2,2,1,1,2,2,1,1,1,2,1,2,2,1,2,1,1,1,2,1,1,2,1,0,1,1,1,1,1,1,1,2,2,1,0,0,1,1,1,0,0,1,0,1,2,2,2,0,2,1,2,2,2,0,1,1,1,1,1,1,1,2,1,2,2,1,1,0,2,1,0,0,1,1,0,2,1,1,1,2,2,1,0,2,1,0,2,0,2,2,1,2,2,2,1,1,2,1,2,1,2,1,1,1,1,0,2,1,1,1,0,2,1,1,1,0,0,1,1,1,2,0,2,1,0,2,1,1,0,1,1,2,1,2,2,0,1,1,2,2,2,0,2,1,2,1,1,2,1,1,1,2,2,1,1,2,2,2,2,1,1,1,1,2,0,2,2,1,2,1,2,0,1,1,2…	-	-	-	-	-
523	umc2228	mu	bnl9.11b	chr01	141.7	1.9	-	-	MMP	1,0,1,0,2,0,2,2,1,2,1,2,1,1,1,0,2,1,2,1,1,2,2,2,0,2,2,1,1,0,2,1,1,1,2,1,2,2,0,2,1,1,1,2,0,1,0,2,0,2,1,1,1,1,1,1,0,2,0,0,0,1,1,1,0,0,1,0,1,2,2,2,0,0,1,0,2,2,0,1,1,1,1,1,0,1,2,1,2,2,1,1,0,2,2,0,0,2,1,0,2,1,1,1,2,2,1,0,2,1,0,2,0,1,2,1,2,2,2,1,1,2,1,2,0,0,1,1,1,1,0,2,1,0,0,0,0,1,1,1,0,0,0,1,1,2,0,2,1,0,2,1,1,0,1,1,2,1,2,2,0,1,1,2,2,0,0,2,1,2,1,1,2,1,1,1,2,2,1,1,2,2,2,2,1,1,1,1,2,0,2,2,0,0,1,2,0,1,0,0…	BG873826,CC786781	CC786781	chr01	72686206	Consistent
524	IDPCP104422b	mu	bnl9.11b	chr01	141.7	3.2	Dominant	+/-	ISU Map7	1,0,0,0,2,0,2,2,0,2,0,2,0,1,1,2,2,0,0,1,1,1,2,2,0,2,2,1,1,2,2,1,1,1,0,0,2,2,0,0,2,0,1,2,0,1,2,1,0,1,1,0,1,1,0,1,2,0,1,0,0,1,1,0,0,0,0,0,1,2,2,2,0,2,0,0,0,0,0,0,0,0,0,0,0,0,0,0,0,0,0,0,0,0,0,0,0,0,0,0,0,0,0,0,0,0,0,0,0,0,0,0,0,0,0,0,0,0,0,0,0,0,0,0,0,0,0,0,0,0,0,0,0,0,0,0,0,0,0,0,0,0,0,0,0,0,0,0,0,0,0,0,0,0,0,0,0,0,0,0,0,0,0,0,0,0,0,0,0,0,0,0,0,0,0,0,0,0,0,0,0,0,0,0,0,0,0,0,0,0,0,0,0,0,0,0,0,0,0,0…	MAGIv3.1_104422	MAGIv3.1_104422	chr08	21913626	Inconsistent
525	IDP1953	mu	bnl9.11b	chr01	141.7	2.4	Dominant	-/+	ISU Map7	1,2,1,2,2,1,2,2,0,2,1,2,1,1,1,1,2,0,0,1,1,2,1,2,2,2,2,1,1,2,2,1,1,1,0,0,2,2,0,2,1,1,1,2,1,1,2,1,1,1,1,1,1,1,1,1,2,0,0,1,1,1,1,0,1,1,1,1,0,2,2,2,2,1,1,2,0,2,2,1,1,0,2,1,1,1,2,1,2,2,1,1,1,2,2,1,1,2,1,2,2,1,0,1,2,2,1,2,1,0,1,2,2,2,2,1,2,2,0,1,1,2,1,2,0,0,1,2,1,1,1,2,0,1,0,2,2,1,1,0,2,2,1,1,1,2,2,2,1,1,2,0,1,1,1,1,2,0,1,1,2,2,0,2,1,2,2,2,1,0,0,0,2,0,1,1,2,0,1,1,2,1,2,2,1,1,2,1,0,1,2,1,1,2,2,2,1,1,1,2…	MEC_84321_P95-Mar06	-	-	-	-
526	MAGI_79262	mu	bnl9.11b	chr01	141.7	1.5	-	SNP	ISU SNP Map	1,2,0,2,2,1,2,2,0,2,1,2,1,1,1,1,1,0,0,1,1,1,1,2,2,2,2,1,1,2,2,1,1,1,0,0,2,2,0,0,1,1,1,2,1,1,1,1,1,1,1,1,1,1,1,1,2,0,0,1,1,1,1,0,1,1,1,0,0,2,2,2,2,1,1,2,0,2,2,1,1,0,1,1,1,1,2,1,2,2,1,1,1,2,2,1,1,2,1,2,2,1,0,1,2,2,1,2,2,0,1,1,2,1,2,1,2,2,0,1,1,2,1,2,0,0,1,2,1,1,1,2,0,1,0,2,1,1,1,0,2,2,1,1,0,2,2,2,1,1,2,0,1,1,1,1,1,0,0,0,2,2,0,2,1,2,2,2,1,0,0,0,2,0,1,1,2,0,1,1,2,1,2,2,1,1,2,1,0,1,2,1,1,2,1,2,1,1,2,2…	MAGIv3.1_79262	MAGIv3.1_79262	chr01	72093277	Consistent
527	MAGI_107220	mu	bnl9.11b	chr01	141.7	0.6	-	SNP	ISU SNP Map	0,2,0,2,2,1,2,2,0,2,1,2,1,1,1,0,2,0,0,1,1,2,2,2,2,0,0,1,1,2,2,1,1,1,0,0,2,2,0,0,1,1,1,2,1,1,2,1,1,1,1,1,1,1,1,1,2,0,0,2,1,1,1,0,0,1,1,0,0,2,2,2,2,2,1,0,0,2,2,1,1,0,1,1,1,1,2,1,2,2,1,1,1,2,2,1,1,2,1,2,2,1,0,0,0,0,0,2,2,0,1,0,2,1,2,1,2,2,0,1,1,2,1,2,0,0,1,2,1,1,1,2,0,0,0,2,2,1,1,0,2,2,1,1,0,2,2,0,1,1,2,0,1,1,1,1,2,0,0,0,2,2,0,2,0,2,2,2,1,0,0,0,2,0,1,1,2,0,1,1,2,0,2,2,1,1,2,1,0,1,2,1,1,0,0,0,1,1,1,2…	MAGIv3.1_107220	MAGIv3.1_107220	chr01	72248754	Consistent
528	IDP99	mu	bnl9.11b	chr01	141.7	0.9	Co-Dominant	Size	ISU Map7	1,2,0,0,0,1,2,2,0,2,1,0,1,1,1,1,2,0,0,1,1,2,2,2,2,2,2,1,1,2,2,1,1,1,0,0,2,2,0,2,1,1,1,2,1,1,2,1,1,1,1,1,1,1,1,1,2,0,0,2,1,1,1,0,1,1,1,1,0,0,2,2,2,2,1,2,0,2,2,1,1,0,1,1,1,1,2,1,2,2,1,1,1,2,2,1,1,2,1,2,2,1,0,1,2,2,1,2,2,0,1,2,2,0,2,1,2,2,0,1,1,2,1,2,0,0,1,2,1,1,1,0,0,1,0,2,2,1,1,0,2,2,1,1,1,2,2,2,1,1,2,0,1,1,1,1,2,0,0,0,2,2,0,2,1,2,2,2,1,0,0,0,2,0,1,1,2,0,1,1,2,2,0,2,1,1,2,1,0,1,2,1,1,2,1,2,1,1,1,2…	MAGIv3.1_107220	MAGIv3.1_107220	chr01	72248754	Consistent
529	IDP8271	mu	bnl9.11b	chr01	141.7	1.7	Dominant	+/-	ISU Map7	1,2,2,2,2,1,2,2,0,2,1,2,1,1,1,1,2,0,0,1,1,2,2,2,2,2,2,1,1,2,2,1,1,1,0,0,2,2,0,2,1,1,2,1,1,1,2,1,1,1,1,1,1,1,1,1,2,0,0,2,1,1,1,0,0,1,1,1,0,1,2,2,2,2,1,2,0,2,2,1,1,0,1,1,1,1,2,1,2,2,1,1,1,2,2,1,1,2,2,2,2,1,0,1,2,2,1,2,2,0,1,2,2,2,2,1,2,2,0,1,1,2,1,2,0,0,1,2,1,1,1,2,0,1,0,2,2,1,1,0,2,2,1,1,1,2,2,2,1,1,2,0,1,1,1,1,2,0,2,2,2,2,0,2,1,2,2,2,1,0,0,0,2,0,1,1,2,0,1,1,2,2,2,2,1,1,2,1,0,1,2,1,1,2,1,2,1,1,1,2…	MAGIv3.1_103134	MAGIv3.1_103134	chr01	72279766	Consistent
530	IDP8965	mu	bnl9.11b	chr01	141.7	1.7	Dominant	+/-	ISU Map7	1,2,2,2,2,2,2,2,0,2,1,2,2,2,1,1,2,0,0,1,1,2,2,2,2,2,2,1,1,2,2,1,1,1,0,0,2,2,0,2,1,1,1,2,1,1,2,1,1,1,1,1,1,1,1,1,2,0,0,2,1,1,1,0,1,1,1,1,0,1,2,2,2,2,1,2,0,2,2,1,1,0,2,1,1,1,2,1,2,2,2,2,1,2,2,1,1,2,1,2,2,1,0,1,2,2,1,2,2,0,1,2,2,2,2,1,2,2,0,1,1,2,1,2,0,0,1,2,1,1,1,2,0,2,0,2,2,1,1,0,2,2,1,1,1,2,2,2,1,1,2,0,1,1,1,1,2,0,0,0,2,2,0,2,1,2,2,2,1,0,0,0,2,0,1,1,2,0,1,1,2,2,2,1,1,1,2,1,0,1,2,1,1,2,1,2,1,1,1,2…	MAGIv3.1_58271	MAGIv3.1_58271	chr01	73268182	Consistent
531	IDP8016	mu	bnl9.11b	chr01	141.7	1.4	Dominant	+/-	ISU Map7	1,2,2,2,2,1,2,2,0,2,1,2,1,1,1,1,2,0,0,1,1,2,2,2,2,2,2,1,1,2,2,1,1,1,0,0,2,2,0,2,2,1,1,2,1,1,2,1,1,1,1,1,1,1,1,1,2,0,0,2,1,1,1,0,1,1,1,1,0,1,2,2,2,2,1,2,0,2,2,1,1,0,1,1,1,1,2,1,2,2,1,1,1,2,2,1,1,2,1,2,2,1,0,1,2,2,1,2,2,0,1,2,2,2,2,1,2,2,0,1,1,2,1,2,0,0,1,2,1,1,1,2,0,1,0,2,2,1,1,0,2,2,1,1,1,2,2,2,1,1,2,0,1,1,1,1,2,0,2,2,2,2,0,2,1,2,2,2,1,0,0,0,2,0,1,1,2,0,1,1,2,2,2,1,1,1,1,1,0,1,2,1,1,2,1,2,1,1,1,2…	MAGIv3.1_25597	MAGIv3.1_25597	chr01	73130491	Consistent
532	IDP6044	mu	bnl9.11b	chr01	141.7	2.5	Dominant	+/-	ISU Map7	1,2,2,1,1,1,2,2,0,2,1,1,1,1,1,1,2,0,0,1,1,2,2,2,2,2,2,1,1,2,2,1,1,1,0,0,2,2,0,2,2,1,1,2,1,1,2,1,1,1,1,1,1,1,1,1,2,0,0,2,1,1,1,0,1,1,1,1,0,1,2,2,1,2,1,2,0,2,2,1,1,0,1,1,1,1,2,1,2,2,1,1,1,2,2,1,1,2,1,2,2,1,0,1,2,2,1,2,2,0,1,2,2,2,2,1,2,2,0,1,1,2,1,2,0,0,1,2,1,1,1,2,0,1,0,2,2,1,1,0,2,2,1,1,1,2,2,2,1,1,2,0,1,1,1,1,2,0,0,0,2,2,0,2,1,2,2,2,1,0,0,0,2,0,1,1,2,0,1,1,2,2,1,1,1,1,2,1,0,1,2,1,1,2,1,2,1,1,1,2…	MAGIv3.1_110420	MAGIv3.1_110420	chr01	74586346	Consistent
533	IDP6832	mu	bnl9.11b	chr01	141.7	2.7	Dominant	+/-	ISU Map7	1,2,2,1,1,1,2,2,0,2,1,2,1,1,1,1,2,0,0,2,1,2,2,2,2,1,2,1,1,2,2,1,1,1,0,0,2,2,0,2,2,1,1,2,1,2,2,1,1,1,2,2,1,1,1,1,2,0,0,2,1,1,1,0,1,1,1,1,0,1,2,2,1,2,1,2,0,2,2,1,1,0,2,1,1,1,2,1,2,2,1,2,1,2,2,1,1,2,2,2,2,1,0,1,2,2,2,2,2,0,2,2,2,2,2,1,2,2,0,1,1,2,1,2,0,0,1,2,1,1,0,2,0,1,0,2,2,2,1,0,2,2,1,1,1,2,2,2,1,1,2,0,1,1,1,1,2,0,0,0,2,2,0,2,1,2,2,2,1,0,0,0,2,0,1,1,2,0,1,1,2,2,2,1,1,1,2,1,0,2,2,1,1,2,1,2,1,1,1,2…	MAGIv3.1_101321	MAGIv3.1_101321	chr01	76024943	Consistent
534	IDP252	mu	bnl9.11b	chr01	141.7	1.7	Dominant	+/-	ISU Map7	1,2,2,1,1,1,2,2,0,2,1,2,1,1,1,1,2,0,0,1,1,2,2,2,2,1,2,1,1,2,2,1,1,1,0,0,2,2,0,2,2,1,1,2,1,2,2,1,1,1,1,2,1,1,1,1,2,0,0,2,1,1,1,0,1,1,1,1,0,2,2,2,1,2,1,2,0,2,2,1,1,0,1,1,1,1,2,1,2,2,1,2,1,2,2,1,1,2,1,2,2,1,0,1,2,2,2,2,2,0,1,2,2,1,2,1,2,2,0,1,1,2,1,2,0,0,1,2,1,1,1,2,0,1,0,2,2,1,1,0,2,2,1,1,1,2,2,2,2,1,2,0,1,1,2,1,2,0,0,0,2,2,0,2,1,2,2,2,1,0,0,0,2,0,1,1,2,0,1,1,2,2,2,1,1,1,2,1,0,1,0,1,1,2,1,2,1,1,1,2…	MEC_90165_P95-Mar06	MEC_90165_P95-Mar06	chr01	75652522	Consistent
535	IDP4684	mu	bnl9.11b	chr01	141.7	1.3	Dominant	+/-	ISU Map7	1,2,2,2,2,1,2,2,0,2,2,2,2,2,1,1,2,0,0,1,1,2,2,2,2,1,2,1,1,2,2,1,1,1,0,0,2,2,0,2,2,1,1,2,1,2,2,1,1,1,1,1,1,1,1,1,2,0,0,2,1,1,1,0,1,1,1,1,0,1,2,2,1,2,1,2,0,2,2,1,1,0,1,1,1,1,2,1,2,2,1,2,1,2,2,1,1,2,1,2,2,1,0,1,2,2,2,2,2,0,1,2,2,2,2,1,2,2,0,1,1,2,1,2,0,0,1,2,1,1,1,2,0,1,0,2,2,1,1,0,2,2,1,1,1,2,2,2,1,1,2,0,1,1,1,1,2,0,0,0,2,2,0,2,1,2,2,2,1,0,0,0,2,0,1,1,2,0,1,1,2,2,2,1,1,1,2,1,0,1,2,1,1,2,1,2,1,1,1,2…	MAGIv3.1_53090	MAGIv3.1_53090	chr01	75068747	Consistent
536	MAGI_18365	mu	bnl9.11b	chr01	141.7	0.5	-	SNP	ISU SNP Map	1,2,0,1,1,1,0,2,0,2,0,2,1,1,1,0,2,0,0,1,1,2,2,2,2,1,0,1,1,2,2,1,1,1,0,0,2,2,0,0,2,1,1,2,1,2,2,1,1,1,0,1,1,0,1,1,2,0,0,2,1,0,1,0,1,1,1,0,0,2,2,2,1,2,1,2,0,2,2,0,1,0,1,1,1,1,2,1,2,2,1,2,1,2,2,1,1,2,1,2,2,1,0,1,2,2,2,2,2,0,2,2,2,2,2,0,2,2,0,1,1,2,1,2,0,0,1,2,1,1,1,2,0,1,0,2,2,1,1,0,2,2,1,1,0,2,2,2,0,1,2,0,1,1,1,1,2,0,0,0,2,2,0,2,1,2,2,2,1,0,0,0,2,0,1,1,2,0,1,1,2,0,2,1,1,1,2,1,0,1,2,1,1,2,1,2,1,1,1,2…	MAGIv3.1_18365	MAGIv3.1_18365	chr01	75653466	Consistent
537	IDP1473	mu	bnl9.11b	chr01	141.7	1.9	Co-Dominant	Size	ISU Map7	1,2,0,1,1,1,2,2,0,2,1,2,1,1,1,1,2,0,0,1,1,2,2,2,2,1,2,1,1,2,2,1,1,1,0,0,2,2,0,2,2,1,1,2,1,2,2,1,1,1,1,1,1,1,1,1,2,0,0,2,1,1,1,0,1,1,1,1,0,2,2,2,1,2,1,2,0,2,2,1,1,0,1,1,1,1,2,1,2,2,1,2,1,2,2,1,1,2,1,2,2,1,0,1,2,2,2,2,2,0,1,2,2,1,2,1,2,2,0,1,1,2,1,2,0,0,1,2,1,1,1,2,0,1,0,2,2,1,1,0,2,2,1,1,1,2,2,2,1,1,2,0,1,1,1,1,2,0,0,0,2,2,0,2,1,2,2,2,1,0,0,0,2,0,1,1,2,0,1,1,2,2,2,1,1,1,2,1,0,1,2,1,1,2,1,2,1,1,1,2…	MEC_84409_P95-Mar06	-	-	-	-
538	gnp_BE129781	mu	bnl9.11b	chr01	141.7	1.6	-	-	Genoplante Map	2,0,0,0,1,0,2,2,0,2,0,0,0,1,0,1,0,0,0,1,1,0,0,2,0,1,2,1,1,2,1,0,0,1,0,0,2,0,0,0,0,0,1,2,0,0,2,1,0,1,1,0,0,0,0,1,2,0,0,0,0,1,0,0,0,0,0,0,1,2,0,2,0,0,0,0,0,0,0,0,0,0,0,0,0,0,0,0,0,0,0,0,0,0,0,0,0,0,0,0,0,0,0,0,0,0,0,0,0,0,0,0,0,0,0,0,0,0,0,0,0,0,0,0,0,0,0,0,0,0,0,0,0,0,0,0,0,0,0,0,0,0,0,0,0,0,0,0,0,0,0,0,0,0,0,0,0,0,0,0,0,0,0,0,0,0,0,0,0,0,0,0,0,0,0,0,0,0,0,0,0,0,0,0,0,0,0,0,0,0,0,0,0,0,0,0,0,0,0,0…	BE129781	BE129781	chr01	75652581	Consistent
539	gnp_QBH9g01a	mu	bnl9.11b	chr01	141.7	0.9	-	-	Genoplante Map	0,0,0,0,1,0,2,2,0,2,0,2,0,1,1,1,2,0,0,1,1,2,2,2,0,2,1,1,1,0,0,0,0,1,0,0,2,0,0,0,0,0,0,0,0,0,0,1,0,1,1,0,0,0,0,1,2,0,0,0,0,1,1,0,0,0,0,0,1,0,0,0,0,0,0,0,0,0,0,0,0,0,0,0,0,0,0,0,0,0,0,0,0,0,0,0,0,0,0,0,0,0,0,0,0,0,0,0,0,0,0,0,0,0,0,0,0,0,0,0,0,0,0,0,0,0,0,0,0,0,0,0,0,0,0,0,0,0,0,0,0,0,0,0,0,0,0,0,0,0,0,0,0,0,0,0,0,0,0,0,0,0,0,0,0,0,0,0,0,0,0,0,0,0,0,0,0,0,0,0,0,0,0,0,0,0,0,0,0,0,0,0,0,0,0,0,0,0,0,0…	CX129499	-	-	-	-
540	IDP4988	mu	bnl9.11b	chr01	141.7	1.8	Dominant	+/-	ISU Map7	1,0,0,0,1,0,2,2,0,2,0,2,0,1,1,1,2,0,0,1,1,2,2,2,0,2,2,1,1,2,2,1,1,1,0,0,2,2,0,0,1,0,1,2,0,2,2,1,0,1,1,0,1,1,0,1,2,0,1,0,0,1,1,0,0,0,0,0,1,2,2,2,0,2,0,0,0,0,0,0,0,0,0,0,0,0,0,0,0,0,0,0,0,0,0,0,0,0,0,0,0,0,0,0,0,0,0,0,0,0,0,0,0,0,0,0,0,0,0,0,0,0,0,0,0,0,0,0,0,0,0,0,0,0,0,0,0,0,0,0,0,0,0,0,0,0,0,0,0,0,0,0,0,0,0,0,0,0,0,0,0,0,0,0,0,0,0,0,0,0,0,0,0,0,0,0,0,0,0,0,0,0,0,0,0,0,0,0,0,0,0,0,0,0,0,0,0,0,0,0…	MAGIv3.1_57381	-	-	-	-
541	IDP7261	mu	bnl9.11b	chr01	141.7	1.5	Dominant	+/-	ISU Map7	1,2,2,1,1,1,2,2,0,2,1,2,1,1,1,1,2,0,0,1,1,2,2,2,2,1,2,1,1,2,2,1,1,1,0,0,2,2,0,2,2,1,1,2,1,2,2,1,1,1,1,1,1,1,1,1,2,0,0,2,1,1,1,0,1,1,1,1,0,1,2,2,1,2,1,2,0,2,2,1,1,0,1,1,1,1,2,1,2,2,1,2,1,2,2,1,1,2,1,2,2,1,0,1,2,2,2,2,2,0,1,2,2,2,2,1,2,2,0,1,1,2,1,2,0,0,1,2,1,1,1,1,0,1,0,1,1,1,2,0,1,2,2,1,2,1,2,2,1,1,2,0,1,2,2,1,1,0,2,2,1,2,0,2,2,2,1,2,2,0,0,0,2,0,2,1,2,0,2,1,1,2,1,2,1,2,2,1,0,1,1,2,1,2,2,1,1,2,2,1…	MAGIv3.1_31739	MAGIv3.1_31739	chr01	75151158	Consistent
542	IDP442	sk	-	chr01	142.4	0	Dominant	+/-	ISU Map7	1,0,0,0,1,0,2,2,0,2,0,2,0,1,1,1,2,0,0,1,1,2,2,2,0,2,2,1,1,2,2,1,1,1,0,0,2,2,0,0,2,0,1,2,0,1,2,1,0,1,1,0,1,1,0,1,2,0,1,0,0,1,1,0,0,0,0,0,1,2,2,2,0,2,0,0,0,0,0,0,0,0,0,0,0,0,0,0,0,0,0,0,0,0,0,0,0,0,0,0,0,0,0,0,0,0,0,0,0,0,0,0,0,0,0,0,0,0,0,0,0,0,0,0,0,0,0,0,0,0,0,0,0,0,0,0,0,0,0,0,0,0,0,0,0,0,0,0,0,0,0,0,0,0,0,0,0,0,0,0,0,0,0,0,0,0,0,0,0,0,0,0,0,0,0,0,0,0,0,0,0,0,0,0,0,0,0,0,0,0,0,0,0,0,0,0,0,0,0,0…	MAGIv3.1_10058	MAGIv3.1_10058	chr01	74054437	Consistent
543	TIDP6496	sk	-	chr01	142.4	0	Co-Dominant	TGCE	ISU Map7	1,0,0,0,1,0,2,2,0,2,0,2,0,1,1,0,2,0,0,1,1,2,2,2,0,2,2,1,1,2,2,1,1,1,0,0,2,2,0,0,0,0,1,0,0,1,2,1,0,1,1,0,1,1,0,1,2,0,1,0,0,1,1,0,0,0,0,0,0,2,2,2,0,2,0,0,0,0,0,0,0,0,0,0,0,0,0,0,0,0,0,0,0,0,0,0,0,0,0,0,0,0,0,0,0,0,0,0,0,0,0,0,0,0,0,0,0,0,0,0,0,0,0,0,0,0,0,0,0,0,0,0,0,0,0,0,0,0,0,0,0,0,0,0,0,0,0,0,0,0,0,0,0,0,0,0,0,0,0,0,0,0,0,0,0,0,0,0,0,0,0,0,0,0,0,0,0,0,0,0,0,0,0,0,0,0,0,0,0,0,0,0,0,0,0,0,0,0,0,0…	MAGIv3.1_36610	MAGIv3.1_36610	chr01	74247978	Consistent
544	dupssr26	sk	-	chr01	142.4	0	-	-	Genoplante Map	0,0,0,0,1,0,2,2,0,2,0,2,0,1,1,1,2,0,0,0,1,2,2,2,0,2,2,1,1,2,2,1,1,1,0,0,2,2,0,0,0,0,1,2,0,1,2,1,0,1,1,0,1,1,0,1,2,0,1,0,0,1,1,0,0,0,0,0,1,2,2,2,0,2,0,0,0,0,0,0,0,0,0,0,0,0,0,0,0,0,0,0,0,0,0,0,0,0,0,0,0,0,0,0,0,0,0,0,0,0,0,0,0,0,0,0,0,0,0,0,0,0,0,0,0,0,0,0,0,0,0,0,0,0,0,0,0,0,0,0,0,0,0,0,0,0,0,0,0,0,0,0,0,0,0,0,0,0,0,0,0,0,0,0,0,0,0,0,0,0,0,0,0,0,0,0,0,0,0,0,0,0,0,0,0,0,0,0,0,0,0,0,0,0,0,0,0,0,0,0…	-	-	-	-	-
545	TIDP5182	mu	dupssr26	chr01	142.4	3.8	Co-Dominant	TGCE	ISU Map7	1,0,0,0,1,0,2,2,0,2,0,2,0,1,1,2,2,0,0,1,1,2,2,2,0,1,1,1,1,2,2,1,1,1,0,0,2,2,0,0,2,0,1,2,0,2,2,1,0,1,1,0,1,1,0,1,0,0,1,0,0,1,1,0,0,0,0,0,2,2,2,2,0,2,0,0,0,0,0,0,0,0,0,0,0,0,0,0,0,0,0,0,0,0,0,0,0,0,0,0,0,0,0,0,0,0,0,0,0,0,0,0,0,0,0,0,0,0,0,0,0,0,0,0,0,0,0,0,0,0,0,0,0,0,0,0,0,0,0,0,0,0,0,0,0,0,0,0,0,0,0,0,0,0,0,0,0,0,0,0,0,0,0,0,0,0,0,0,0,0,0,0,0,0,0,0,0,0,0,0,0,0,0,0,0,0,0,0,0,0,0,0,0,0,0,0,0,0,0,0…	MAGIv3.1_56780	MAGIv3.1_56780	chr01	76053440	Consistent
546	IMR21	mu	dupssr26	chr01	142.4	2.2	Dominant	+/-	ISU Map7	1,2,1,1,1,1,2,2,0,1,1,1,1,1,1,1,2,0,0,1,1,2,2,2,2,1,2,1,1,2,2,1,1,1,0,0,2,2,0,2,2,1,1,2,1,2,2,1,1,1,1,2,1,1,1,1,2,0,0,2,1,1,1,0,1,1,1,1,0,2,2,2,1,2,1,2,0,2,2,1,1,0,2,1,2,1,2,1,2,2,1,2,1,1,2,1,1,2,1,2,2,1,0,1,1,2,2,2,2,0,1,1,2,2,2,1,2,2,0,1,1,2,1,2,0,0,1,2,1,1,1,2,0,2,0,2,1,2,1,0,2,2,1,1,1,2,2,2,1,1,2,0,1,1,1,1,2,0,0,0,2,2,0,2,1,2,2,2,1,0,0,0,2,0,1,1,1,0,1,1,2,2,2,1,1,1,2,1,0,2,2,1,1,2,1,2,2,1,1,2…	MAGIv3.1_95518	MAGIv3.1_95518	chr01	79287418	Consistent
547	IDP6063	mu	dupssr26	chr01	142.4	1.4	Dominant	+/-	ISU Map7	1,2,2,1,1,1,2,2,0,1,1,2,1,1,1,1,2,0,0,1,1,2,2,2,2,1,2,1,1,2,2,1,1,1,0,0,2,2,0,2,2,1,1,2,1,2,2,1,1,1,1,2,1,1,1,1,2,0,0,2,1,1,1,0,1,1,1,1,0,1,2,2,1,2,1,2,0,2,2,1,1,0,1,1,1,1,2,1,2,2,1,2,1,2,2,1,1,2,1,2,2,1,0,1,2,2,2,2,2,0,2,1,2,2,2,1,2,2,0,1,1,2,1,2,0,0,1,2,1,1,1,2,0,1,0,2,2,2,1,0,2,2,1,1,1,2,2,2,1,1,2,0,1,1,1,1,2,0,0,0,2,2,0,2,1,2,2,2,1,0,0,0,2,0,1,1,1,0,1,1,2,2,2,1,1,1,2,1,0,2,2,1,1,2,1,2,1,1,1,2…	MAGIv3.1_36481	MAGIv3.1_36481	chr01	76348210	Consistent
548	IDP6075	mu	dupssr26	chr01	142.4	1.7	Dominant	+/-	ISU Map7	1,2,2,1,1,1,2,2,0,1,1,1,1,1,1,1,2,0,0,1,1,2,2,2,2,1,2,1,1,2,2,1,1,1,0,0,2,2,0,2,2,1,1,2,1,2,2,1,1,1,1,2,1,2,1,1,2,0,0,2,1,1,1,0,1,1,1,1,0,1,2,2,2,2,1,2,0,2,2,1,1,0,1,1,1,1,2,1,2,2,1,2,1,2,2,1,1,2,1,2,2,1,0,2,2,2,2,2,2,0,2,1,2,2,2,1,2,2,0,1,1,2,1,2,0,0,1,2,1,1,1,2,0,1,0,2,2,2,1,0,2,2,1,1,1,2,2,2,1,1,2,0,1,1,1,1,2,0,0,0,2,2,0,2,1,2,2,2,1,0,0,0,2,0,1,1,2,0,1,1,2,2,1,1,1,1,2,1,0,1,2,1,1,2,1,2,1,1,1,2…	MAGIv3.1_113766	MAGIv3.1_113766	chr01	78126468	Consistent
549	MAGI_97072	mu	dupssr26	chr01	142.4	0.8	-	SNP	ISU SNP Map	1,2,0,1,1,1,2,2,0,1,1,1,1,1,1,0,2,0,0,1,1,2,2,2,2,1,2,1,1,2,2,1,1,1,0,0,2,2,0,0,1,1,1,2,1,2,2,0,1,0,1,2,1,0,1,0,2,0,0,2,1,1,1,0,0,1,1,0,0,2,2,2,1,2,1,2,0,2,2,0,1,0,1,0,1,1,2,1,2,2,1,2,1,2,2,1,1,2,1,2,2,1,0,1,2,2,2,2,2,0,0,1,2,1,2,1,2,2,0,1,1,2,1,2,0,0,1,2,1,1,1,2,0,1,0,2,2,2,0,0,2,2,1,1,0,2,2,2,1,1,2,0,1,1,1,1,2,0,0,0,2,2,0,2,1,2,2,2,1,0,0,0,2,0,1,1,1,0,1,1,2,0,2,1,1,1,2,1,0,2,2,1,1,2,1,2,1,1,1,2…	MAGIv3.1_97072	MAGIv3.1_97072	chr01	77867741	Consistent
550	MAGI_108005	sk	-	chr01	145.6	0	-	SNP	ISU SNP Map	1,2,0,1,1,1,2,2,0,1,0,1,1,1,1,0,2,0,0,1,1,2,2,1,2,1,2,1,1,2,2,1,1,1,0,0,2,2,0,0,1,1,1,2,1,2,2,1,1,1,1,2,1,1,1,1,2,0,0,2,1,1,1,0,1,1,0,0,0,2,2,2,1,2,1,2,0,2,2,1,1,0,2,1,2,1,2,1,2,2,1,2,1,0,2,1,1,2,1,2,2,1,0,1,2,2,2,2,2,0,1,1,2,1,2,1,2,2,0,1,0,2,1,2,0,0,1,2,1,1,1,2,0,1,0,2,1,2,1,0,2,2,1,1,0,2,2,2,1,0,2,0,1,1,1,1,2,0,0,0,1,2,0,1,1,2,2,2,1,0,0,0,2,0,1,1,1,0,1,1,2,0,2,0,1,1,2,1,0,2,2,1,1,2,1,2,1,1,1,2…	MAGIv3.1_108005	MAGIv3.1_108005	chr01	79451026	Consistent
551	MAGI_114073	mu	MAGI_108005	chr01	145.6	1.1	-	SNP	ISU SNP Map	1,2,0,1,1,1,2,2,0,1,1,1,1,1,1,0,2,0,0,1,1,2,2,1,2,1,2,1,1,2,2,1,1,1,0,0,2,2,0,0,1,1,1,2,1,2,2,1,1,1,1,2,1,1,1,1,2,0,0,2,1,1,1,0,1,1,1,0,0,2,2,2,1,2,1,2,0,2,2,1,1,0,2,1,2,1,2,1,2,2,1,2,1,1,2,1,1,2,1,2,2,1,0,1,2,2,2,2,2,0,1,1,2,2,2,1,2,2,0,1,1,2,1,2,0,0,1,2,1,1,1,2,0,1,0,2,1,2,1,0,2,2,1,1,0,2,2,2,1,1,2,0,1,1,1,1,2,0,0,0,1,2,0,1,1,2,2,2,1,0,0,0,2,0,1,1,1,0,1,1,2,0,2,1,1,1,2,1,0,2,2,1,1,2,1,2,1,1,1,2…	MAGIv3.1_114073	-	-	-	-
552	IDP376	mu	MAGI_108005	chr01	145.6	1.5	Dominant	-/+	ISU Map7	1,0,0,0,1,0,2,2,0,1,0,1,0,1,1,2,2,0,0,1,1,2,2,1,0,1,2,1,1,2,2,1,1,1,0,0,2,2,0,0,2,0,1,2,0,2,2,1,0,1,1,0,1,1,0,1,2,0,1,0,0,1,1,0,0,0,0,0,2,2,2,2,0,2,0,0,0,0,0,0,0,0,0,0,0,0,0,0,0,0,0,0,0,0,0,0,0,0,0,0,0,0,0,0,0,0,0,0,0,0,0,0,0,0,0,0,0,0,0,0,0,0,0,0,0,0,0,0,0,0,0,0,0,0,0,0,0,0,0,0,0,0,0,0,0,0,0,0,0,0,0,0,0,0,0,0,0,0,0,0,0,0,0,0,0,0,0,0,0,0,0,0,0,0,0,0,0,0,0,0,0,0,0,0,0,0,0,0,0,0,0,0,0,0,0,0,0,0,0,0…	MEC_37230_P95-Mar06	MEC_37230_P95-Mar06	chr01	78954833	Consistent
553	umc2229	mu	MAGI_108005	chr01	145.6	0.7	-	-	MMP	1,0,1,0,1,0,2,2,1,1,1,1,1,1,1,2,2,1,2,1,1,2,2,1,0,1,2,1,1,0,2,1,1,1,2,1,2,2,0,2,1,1,1,2,0,0,2,1,0,1,1,0,0,1,1,1,2,2,0,0,0,1,1,1,0,0,1,0,1,2,2,2,0,0,1,0,2,2,0,1,1,1,2,1,0,1,2,1,2,2,1,2,0,1,2,0,0,2,1,0,2,1,1,1,2,2,2,0,2,1,0,1,0,1,2,1,2,0,2,1,1,2,1,2,0,0,1,1,1,1,0,2,1,0,0,0,0,2,1,1,0,0,1,1,0,2,0,2,1,0,2,1,1,0,1,1,2,1,2,2,0,0,2,1,2,0,0,2,1,2,1,1,2,1,1,1,1,2,1,1,2,2,2,1,1,1,1,1,2,0,2,2,0,0,1,2,0,1,0,2…	BI233788,CC739258	BI233788	chr01	79107151	Consistent
554	TMR22	mu	MAGI_108005	chr01	145.6	0.8	Co-Dominant	TGCE	ISU Map7	1,0,0,0,1,0,2,2,0,1,0,1,0,1,1,2,2,0,0,1,1,2,2,1,0,1,2,1,1,2,2,1,0,1,0,0,2,2,0,0,1,0,1,2,0,2,2,1,0,1,1,0,1,1,0,1,2,0,1,0,0,1,1,0,0,0,0,0,1,2,2,2,0,2,0,0,0,0,0,0,0,0,0,0,0,0,0,0,0,0,0,0,0,0,0,0,0,0,0,0,0,0,0,0,0,0,0,0,0,0,0,0,0,0,0,0,0,0,0,0,0,0,0,0,0,0,0,0,0,0,0,0,0,0,0,0,0,0,0,0,0,0,0,0,0,0,0,0,0,0,0,0,0,0,0,0,0,0,0,0,0,0,0,0,0,0,0,0,0,0,0,0,0,0,0,0,0,0,0,0,0,0,0,0,0,0,0,0,0,0,0,0,0,0,0,0,0,0,0,0…	MAGIv3.1_36773	MAGIv3.1_36773	chr01	79290070	Consistent
555	TIDP5737	mu	MAGI_108005	chr01	145.6	0	Co-Dominant	TGCE	ISU Map7	1,0,0,0,1,0,2,2,0,1,0,1,0,1,1,2,2,0,0,1,1,2,2,1,0,1,2,1,1,2,2,1,1,1,0,0,2,2,0,0,1,0,1,2,0,2,2,1,0,1,1,0,1,1,0,1,2,0,1,0,0,1,1,0,0,0,0,0,1,2,2,2,0,2,0,0,0,0,0,0,0,0,0,0,0,0,0,0,0,0,0,0,0,0,0,0,0,0,0,0,0,0,0,0,0,0,0,0,0,0,0,0,0,0,0,0,0,0,0,0,0,0,0,0,0,0,0,0,0,0,0,0,0,0,0,0,0,0,0,0,0,0,0,0,0,0,0,0,0,0,0,0,0,0,0,0,0,0,0,0,0,0,0,0,0,0,0,0,0,0,0,0,0,0,0,0,0,0,0,0,0,0,0,0,0,0,0,0,0,0,0,0,0,0,0,0,0,0,0,0…	MAGIv3.1_114073	-	-	-	-
556	bnlg2295	mu	MAGI_108005	chr01	145.6	0	-	-	MMP	1,0,1,0,1,0,2,2,1,1,1,1,1,1,1,2,2,1,2,1,1,2,2,1,2,1,2,1,1,2,2,1,1,1,2,1,2,2,1,2,0,1,1,2,1,2,2,1,0,1,1,2,1,1,1,1,2,2,1,0,0,1,1,1,0,0,1,0,1,2,2,2,0,2,1,2,2,2,0,1,1,1,2,1,1,1,2,1,2,2,1,2,0,1,2,0,0,2,1,0,2,1,1,1,2,2,2,0,2,1,0,1,0,2,2,1,2,2,2,1,1,2,1,2,2,2,1,1,1,1,0,2,1,1,1,0,2,2,1,1,1,0,1,1,1,2,0,2,1,0,2,1,1,0,1,1,2,1,2,2,0,0,2,0,2,2,0,2,1,2,1,1,2,1,1,1,1,2,1,1,2,2,2,1,1,1,1,1,2,0,2,2,1,2,1,2,0,1,1,2…	-	-	-	-	-
557	gnp_QCC6e06c	mu	MAGI_108005	chr01	145.6	0.5	-	-	Genoplante Map	1,0,0,0,1,0,2,2,0,1,0,1,0,1,1,1,2,0,0,1,1,2,2,2,0,1,2,1,1,2,2,1,1,1,0,0,2,0,0,0,0,0,1,2,0,0,2,0,0,1,1,0,0,1,0,1,2,0,0,0,0,0,1,0,0,0,0,0,1,2,0,2,0,0,0,0,0,0,0,0,0,0,0,0,0,0,0,0,0,0,0,0,0,0,0,0,0,0,0,0,0,0,0,0,0,0,0,0,0,0,0,0,0,0,0,0,0,0,0,0,0,0,0,0,0,0,0,0,0,0,0,0,0,0,0,0,0,0,0,0,0,0,0,0,0,0,0,0,0,0,0,0,0,0,0,0,0,0,0,0,0,0,0,0,0,0,0,0,0,0,0,0,0,0,0,0,0,0,0,0,0,0,0,0,0,0,0,0,0,0,0,0,0,0,0,0,0,0,0,0…	CX129534	CX129534	chr10	111072551	Inconsistent
558	gnp_QAH1h07	mu	MAGI_108005	chr01	145.6	0	-	-	Genoplante Map	1,0,0,0,1,0,2,2,0,1,0,0,0,1,1,1,2,0,0,1,1,0,2,2,0,1,2,1,1,0,0,1,0,0,0,0,0,0,0,0,0,0,1,2,0,0,2,1,0,1,1,0,0,0,0,1,2,0,0,0,0,1,1,0,0,0,0,0,1,0,0,2,0,0,0,0,0,0,0,0,0,0,0,0,0,0,0,0,0,0,0,0,0,0,0,0,0,0,0,0,0,0,0,0,0,0,0,0,0,0,0,0,0,0,0,0,0,0,0,0,0,0,0,0,0,0,0,0,0,0,0,0,0,0,0,0,0,0,0,0,0,0,0,0,0,0,0,0,0,0,0,0,0,0,0,0,0,0,0,0,0,0,0,0,0,0,0,0,0,0,0,0,0,0,0,0,0,0,0,0,0,0,0,0,0,0,0,0,0,0,0,0,0,0,0,0,0,0,0,0…	CD979909	-	-	-	-
559	gnp_QCB6b03	mu	MAGI_108005	chr01	145.6	1.7	-	-	Genoplante Map	0,0,0,0,0,0,2,0,0,0,0,1,0,1,1,1,2,0,0,1,1,2,2,2,0,1,2,1,1,2,2,1,1,1,0,0,2,0,0,0,0,0,1,2,0,0,2,1,0,0,1,0,0,1,0,1,2,0,0,0,0,1,0,0,0,0,0,0,1,2,0,2,0,0,0,0,0,0,0,0,0,0,0,0,0,0,0,0,0,0,0,0,0,0,0,0,0,0,0,0,0,0,0,0,0,0,0,0,0,0,0,0,0,0,0,0,0,0,0,0,0,0,0,0,0,0,0,0,0,0,0,0,0,0,0,0,0,0,0,0,0,0,0,0,0,0,0,0,0,0,0,0,0,0,0,0,0,0,0,0,0,0,0,0,0,0,0,0,0,0,0,0,0,0,0,0,0,0,0,0,0,0,0,0,0,0,0,0,0,0,0,0,0,0,0,0,0,0,0,0…	CX129527	CX129527	chr01	78499731	Consistent
560	IDP8676	mu	MAGI_108005	chr01	145.6	1.1	Dominant	+/-	ISU Map7	2,2,0,1,1,1,2,2,0,1,1,1,1,1,1,1,2,0,0,1,1,2,2,2,2,1,2,1,1,2,2,1,1,1,0,0,2,2,0,2,2,1,1,2,1,2,2,1,1,1,1,2,1,1,1,1,2,0,0,2,1,1,1,0,1,1,1,1,0,1,2,2,1,2,1,2,0,2,2,1,1,0,1,1,1,1,2,1,2,2,1,2,1,2,2,1,1,2,1,2,2,1,0,1,2,2,2,2,2,0,1,1,2,1,2,1,2,2,0,1,1,2,1,2,0,0,1,2,1,1,1,2,0,1,0,2,2,2,1,0,2,2,1,1,1,2,2,2,1,1,2,0,1,1,1,1,2,0,0,0,2,2,0,2,1,2,2,2,1,0,0,0,2,0,1,1,1,0,1,1,2,2,1,1,1,1,1,1,0,2,2,1,1,2,1,2,1,1,1,2…	MAGIv3.1_94225	MAGIv3.1_94225	chr01	77502353	Consistent
561	IDP9114	mu	MAGI_108005	chr01	145.6	0.6	Co-Dominant	Size	ISU Map7	1,2,0,1,1,1,2,2,0,1,1,1,1,1,1,1,2,0,0,1,1,2,2,2,2,1,2,1,1,2,2,1,1,1,0,0,2,2,0,2,2,1,1,2,1,2,2,1,1,1,1,2,1,1,1,1,2,0,0,2,1,1,1,0,1,1,1,0,0,1,2,2,1,2,1,2,0,2,2,1,1,0,2,1,1,1,2,1,2,2,1,2,1,2,2,1,1,2,1,2,0,1,0,1,2,2,2,2,2,0,1,1,2,0,2,0,2,2,0,1,1,2,1,2,0,0,1,2,1,1,1,2,0,1,0,2,2,2,1,0,2,2,1,1,1,2,2,2,1,1,2,0,1,1,1,1,2,0,0,0,2,2,0,2,1,2,2,2,1,0,0,0,2,0,1,1,1,0,1,1,2,2,2,1,1,1,2,1,0,2,2,1,1,2,1,2,1,1,1,2…	MAGIv3.1_78224	MAGIv3.1_78224	chr01	78500210	Consistent
562	IMR18	mu	MAGI_108005	chr01	145.6	0.8	Dominant	+/-	ISU Map7	1,2,2,1,1,1,2,2,0,1,1,1,1,1,1,1,2,0,0,1,1,2,2,1,2,1,2,1,1,2,2,1,1,1,0,0,2,2,0,2,2,1,1,2,1,2,2,1,1,1,1,2,1,1,1,1,2,0,0,2,1,1,1,0,1,1,1,1,0,1,2,2,1,2,1,2,0,2,2,1,1,0,2,1,2,1,2,1,2,2,1,2,1,1,2,1,0,2,1,2,2,1,0,1,2,2,2,2,2,0,1,1,2,2,2,1,2,2,0,1,1,2,1,2,0,0,1,2,1,1,1,2,0,1,0,2,1,2,1,0,2,2,1,1,1,2,2,2,1,1,2,0,1,1,1,1,2,0,0,0,2,2,0,2,1,2,2,2,1,0,0,0,2,0,1,1,1,0,1,1,2,2,2,1,1,1,2,1,0,2,2,1,1,2,1,2,1,1,1,2…	MAGIv3.1_104692	MAGIv3.1_104692	chr01	79107651	Consistent
563	IDP4694	mu	MAGI_108005	chr01	145.6	1.9	Dominant	+/-	ISU Map7	1,2,2,1,1,1,2,2,0,1,1,1,1,1,1,1,2,0,0,1,1,2,2,1,2,1,2,1,1,2,2,1,1,1,0,0,2,2,0,2,1,1,1,2,1,2,2,1,2,1,1,2,1,1,2,1,2,0,0,2,1,1,1,0,1,1,1,1,0,1,2,2,1,2,1,2,0,2,2,1,1,0,2,1,2,1,2,1,2,2,1,2,1,1,2,1,1,2,1,2,2,1,0,1,2,2,2,2,2,0,1,1,2,2,2,1,2,2,0,1,1,2,1,2,0,0,1,2,1,1,1,2,0,1,0,2,1,2,1,0,2,2,1,1,1,2,2,2,1,1,2,0,1,1,1,1,2,0,0,0,1,2,0,1,1,2,2,2,1,0,0,0,2,0,1,1,1,0,1,1,2,2,2,1,1,1,2,1,0,2,2,1,1,2,1,2,1,1,1,2…	MAGIv3.1_67310	MAGIv3.1_67310	chr01	79485276	Consistent
564	IMR19	mu	MAGI_108005	chr01	145.6	3.5	Dominant	+/-	ISU Map7	1,2,2,2,1,1,2,2,0,1,1,2,1,1,1,1,2,0,0,1,1,2,2,2,2,1,2,1,1,2,2,1,1,1,0,0,2,2,0,2,2,1,1,2,1,2,2,1,1,1,1,2,1,1,2,1,2,0,0,2,1,1,1,0,1,1,1,1,0,2,2,2,1,2,1,2,0,2,2,1,1,0,2,1,2,1,2,1,2,2,1,2,1,1,2,1,1,2,1,2,2,1,0,1,1,2,2,2,2,0,2,1,2,2,2,1,2,2,0,1,1,2,1,2,0,0,1,2,1,1,1,2,0,1,0,2,1,2,1,0,2,2,1,1,1,2,2,2,1,1,2,0,1,1,1,1,2,0,0,0,2,2,0,2,1,2,2,2,1,0,0,0,2,0,1,1,1,0,1,1,2,2,2,1,1,1,2,1,0,2,2,1,1,2,1,2,1,1,1,2…	MAGIv3.1_41486	MAGIv3.1_41486	chr01	79752455	Consistent
565	IMR10	mu	MAGI_108005	chr01	145.6	3.9	Dominant	+/-	ISU Map7	1,2,0,1,2,1,2,2,0,2,1,2,1,1,1,1,2,0,0,1,2,2,2,1,2,1,2,1,1,2,2,1,1,1,0,0,2,2,0,2,2,1,1,2,1,2,2,1,1,1,1,2,1,1,2,1,2,0,0,2,1,1,1,0,1,1,1,1,0,1,2,2,1,2,1,2,0,2,2,1,2,0,2,1,2,1,2,1,2,2,2,2,2,2,2,1,2,2,2,2,2,1,0,2,1,2,2,2,2,0,2,1,2,2,2,1,2,2,0,1,1,2,1,2,0,0,1,2,1,1,1,2,0,1,0,1,1,2,1,0,2,2,1,1,1,2,2,2,1,1,2,0,1,1,1,1,2,0,0,0,2,2,0,2,1,2,2,2,1,0,0,0,2,0,1,1,1,0,1,1,2,1,2,1,2,1,2,1,0,2,2,1,2,2,1,2,1,1,1,2…	MAGIv3.1_3019	MAGIv3.1_3019	chr01	80702964	Consistent
566	csu3	mu	MAGI_108005	chr01	145.6	2	-	-	MMP	1,0,2,0,1,0,2,2,1,1,1,1,1,1,1,2,2,1,1,1,1,2,2,1,2,1,2,1,1,2,2,1,1,1,1,1,2,2,1,2,1,1,1,2,1,2,2,1,0,1,1,2,1,1,2,1,2,2,1,0,0,1,1,2,0,0,1,0,1,2,2,2,0,2,1,2,2,2,0,1,1,1,2,1,2,1,2,1,2,2,1,2,0,1,2,0,0,2,1,0,2,1,1,1,1,2,2,0,2,1,0,1,0,2,2,1,2,2,2,1,1,2,1,2,2,2,1,1,1,1,0,2,1,1,1,0,1,0,1,2,0,0,1,1,1,2,0,2,1,0,0,2,1,0,1,1,2,1,2,2,0,2,2,1,2,2,0,2,1,2,1,1,2,1,1,1,1,2,1,1,2,1,2,1,0,0,0,0,0,0,0,0,0,0,0,0,0,0,0,0…	DQ123891,CC758031,AW076336,AW267308,AY112353,AC191042,CC751265,AW053143,CC402270,AI670284,CC751264,AI783123,AI711799,T12526,AW000054,T12525,AI783366,AW000341,AW018018,AY112354	DQ123891,AW076336,AW267308,AY112353,AW053143,AI670284,AI783123,T12526,AW000054,T12525,AI783366,AW000341,AW018018,AY112354	chr01	81359356	Consistent
567	bnlg2086	mu	MAGI_108005	chr01	145.6	0.7	-	-	MMP	1,0,2,0,1,0,2,2,1,1,0,1,1,1,1,2,2,1,0,1,1,2,2,1,2,1,2,1,1,2,2,2,1,1,1,1,2,2,2,0,1,1,0,2,1,2,2,1,0,1,1,2,1,1,2,1,2,0,0,0,0,1,1,2,0,0,0,0,1,2,2,2,0,2,1,2,2,2,0,1,1,1,2,0,0,0,2,0,2,2,1,2,0,2,2,0,0,2,1,0,0,0,0,1,1,2,2,0,2,1,0,0,0,2,2,0,2,2,2,1,1,2,1,0,0,0,0,1,1,1,0,2,0,0,0,0,0,0,0,2,2,0,1,1,1,2,0,2,1,0,2,2,0,0,1,1,2,1,2,2,0,2,2,0,0,0,0,2,1,2,0,0,0,1,0,1,1,2,1,1,2,1,2,1,2,1,0,1,2,0,0,0,1,2,1,2,0,1,1,2…	CC823595,CC751306,CC751305,CC823596	-	-	-	-
568	TIDP7069	mu	MAGI_108005	chr01	145.6	0.4	Co-Dominant	TGCE	ISU Map7	1,0,0,0,1,0,2,2,0,1,0,1,0,1,1,2,2,0,0,1,0,2,2,1,0,1,2,1,1,2,2,1,1,1,0,0,2,2,0,0,1,0,1,2,0,2,2,1,0,1,1,0,1,0,0,1,2,0,1,0,0,1,1,0,0,0,0,0,1,2,1,2,0,2,0,0,0,0,0,0,0,0,0,0,0,0,0,0,0,0,0,0,0,0,0,0,0,0,0,0,0,0,0,0,0,0,0,0,0,0,0,0,0,0,0,0,0,0,0,0,0,0,0,0,0,0,0,0,0,0,0,0,0,0,0,0,0,0,0,0,0,0,0,0,0,0,0,0,0,0,0,0,0,0,0,0,0,0,0,0,0,0,0,0,0,0,0,0,0,0,0,0,0,0,0,0,0,0,0,0,0,0,0,0,0,0,0,0,0,0,0,0,0,0,0,0,0,0,0,0…	MAGIv3.1_77643	MAGIv3.1_77643	chr01	85374666	Consistent
569	IDP839	mu	MAGI_108005	chr01	145.6	0	Dominant	+/-	ISU Map7	1,0,0,0,1,0,2,2,0,1,0,1,0,1,1,2,2,0,0,1,1,2,2,1,0,1,2,1,1,2,2,1,1,1,0,0,2,2,0,0,1,0,1,2,0,2,2,1,0,1,1,0,1,1,0,1,2,0,1,0,0,1,1,0,0,0,0,0,1,2,1,2,0,2,0,0,0,0,0,0,0,0,0,0,0,0,0,0,0,0,0,0,0,0,0,0,0,0,0,0,0,0,0,0,0,0,0,0,0,0,0,0,0,0,0,0,0,0,0,0,0,0,0,0,0,0,0,0,0,0,0,0,0,0,0,0,0,0,0,0,0,0,0,0,0,0,0,0,0,0,0,0,0,0,0,0,0,0,0,0,0,0,0,0,0,0,0,0,0,0,0,0,0,0,0,0,0,0,0,0,0,0,0,0,0,0,0,0,0,0,0,0,0,0,0,0,0,0,0,0…	MAGIv3.1_99834	MAGIv3.1_99834	chr01	81461083	Consistent
570	TIDP2770	mu	MAGI_108005	chr01	145.6	0	Co-Dominant	TGCE	ISU Map7	1,0,0,0,1,0,2,2,0,1,0,1,0,1,1,2,2,0,0,1,1,2,2,1,0,1,2,1,1,2,2,1,1,1,0,0,2,2,0,0,1,0,1,2,0,2,2,1,0,1,1,0,1,1,0,1,2,0,1,0,0,1,1,0,0,0,0,0,1,2,1,2,0,2,0,0,0,0,0,0,0,0,0,0,0,0,0,0,0,0,0,0,0,0,0,0,0,0,0,0,0,0,0,0,0,0,0,0,0,0,0,0,0,0,0,0,0,0,0,0,0,0,0,0,0,0,0,0,0,0,0,0,0,0,0,0,0,0,0,0,0,0,0,0,0,0,0,0,0,0,0,0,0,0,0,0,0,0,0,0,0,0,0,0,0,0,0,0,0,0,0,0,0,0,0,0,0,0,0,0,0,0,0,0,0,0,0,0,0,0,0,0,0,0,0,0,0,0,0,0…	MAGIv3.1_101960	MAGIv3.1_101960	chr01	82611532	Consistent
571	TIDP8768	mu	MAGI_108005	chr01	145.6	0	Co-Dominant	TGCE	ISU Map7	1,0,0,0,1,0,2,2,0,1,0,1,0,1,1,2,2,0,0,1,1,0,2,1,0,1,2,0,1,2,2,1,1,1,0,0,2,2,0,0,1,0,1,2,0,2,2,1,0,1,1,0,1,1,0,1,2,0,1,0,0,1,1,0,0,0,0,0,1,2,1,2,0,2,0,0,0,0,0,0,0,0,0,0,0,0,0,0,0,0,0,0,0,0,0,0,0,0,0,0,0,0,0,0,0,0,0,0,0,0,0,0,0,0,0,0,0,0,0,0,0,0,0,0,0,0,0,0,0,0,0,0,0,0,0,0,0,0,0,0,0,0,0,0,0,0,0,0,0,0,0,0,0,0,0,0,0,0,0,0,0,0,0,0,0,0,0,0,0,0,0,0,0,0,0,0,0,0,0,0,0,0,0,0,0,0,0,0,0,0,0,0,0,0,0,0,0,0,0,0…	MAGIv3.1_54461	MAGIv3.1_54461	chr01	83196207	Consistent
572	TIDP6530	mu	MAGI_108005	chr01	145.6	0.4	Co-Dominant	TGCE	ISU Map7	1,0,0,0,1,0,2,2,0,1,0,1,0,1,2,2,2,0,0,1,1,2,2,1,0,1,2,1,1,2,2,1,1,1,0,0,2,2,0,0,1,0,1,2,0,2,2,1,0,1,1,0,1,1,0,1,2,0,1,0,0,1,1,0,0,0,0,0,1,2,0,2,0,0,0,0,0,0,0,0,0,0,0,0,0,0,0,0,0,0,0,0,0,0,0,0,0,0,0,0,0,0,0,0,0,0,0,0,0,0,0,0,0,0,0,0,0,0,0,0,0,0,0,0,0,0,0,0,0,0,0,0,0,0,0,0,0,0,0,0,0,0,0,0,0,0,0,0,0,0,0,0,0,0,0,0,0,0,0,0,0,0,0,0,0,0,0,0,0,0,0,0,0,0,0,0,0,0,0,0,0,0,0,0,0,0,0,0,0,0,0,0,0,0,0,0,0,0,0,0…	MAGIv3.1_77643	MAGIv3.1_77643	chr01	85374666	Consistent
573	asg3	mu	MAGI_108005	chr01	145.6	0.4	-	-	MMP	1,0,2,0,1,0,2,2,1,1,1,1,1,1,1,2,2,1,1,1,1,2,2,1,2,1,2,1,1,2,2,1,1,1,1,1,2,2,1,2,1,1,1,2,1,2,2,1,0,1,1,2,1,1,2,1,2,2,1,0,0,1,1,2,0,0,1,0,1,2,2,2,0,2,1,2,2,2,0,1,1,1,2,1,2,1,2,1,2,2,1,2,0,1,2,0,0,2,1,0,2,1,1,1,1,2,2,0,2,0,0,1,0,0,2,1,2,2,2,1,1,2,1,2,0,2,1,1,1,1,0,2,1,1,1,0,1,2,1,2,2,0,1,1,1,2,0,2,1,0,2,2,1,0,1,1,2,1,2,2,0,2,2,0,2,2,0,2,1,2,1,1,2,1,1,1,1,2,1,1,2,1,2,1,2,1,1,1,2,0,2,2,2,2,1,2,0,1,1,2…	-	-	-	-	-
574	umc2112	mu	MAGI_108005	chr01	145.6	0.5	-	-	MMP	1,0,2,0,1,0,2,2,0,1,0,1,0,1,0,0,2,1,1,1,1,2,2,1,0,1,2,1,1,1,2,1,1,1,1,1,2,2,1,0,1,1,1,2,1,1,2,1,0,1,1,1,1,1,0,1,0,2,1,0,0,1,1,0,0,0,1,0,0,2,2,2,0,0,1,0,2,2,0,1,1,1,2,1,0,0,2,1,2,2,1,0,0,1,0,0,0,2,0,0,2,1,1,1,1,2,2,0,2,1,0,1,0,0,2,1,2,2,2,1,1,0,0,2,0,0,1,1,1,1,0,2,1,0,0,0,0,2,1,0,2,0,1,1,1,2,0,2,1,0,2,0,1,0,1,1,2,1,2,2,0,2,2,0,2,0,0,2,1,2,1,1,2,1,1,1,1,2,1,1,2,1,0,1,2,1,1,1,2,0,2,2,0,0,1,2,0,1,0,0…	CC754784,CC755122,CC754785,CC755121,AZ932967	-	-	-	-
575	gnp_AW257878	mu	MAGI_108005	chr01	145.6	1.7	-	-	Genoplante Map	0,0,0,0,1,0,2,2,0,1,0,1,0,1,1,1,2,0,0,1,1,2,2,1,0,1,2,1,1,2,0,1,0,1,0,0,2,0,0,0,0,0,1,2,0,0,2,1,0,1,1,0,0,0,0,1,2,0,0,0,0,1,1,0,0,0,0,0,1,2,0,2,0,0,0,0,0,0,0,0,0,0,0,0,0,0,0,0,0,0,0,0,0,0,0,0,0,0,0,0,0,0,0,0,0,0,0,0,0,0,0,0,0,0,0,0,0,0,0,0,0,0,0,0,0,0,0,0,0,0,0,0,0,0,0,0,0,0,0,0,0,0,0,0,0,0,0,0,0,0,0,0,0,0,0,0,0,0,0,0,0,0,0,0,0,0,0,0,0,0,0,0,0,0,0,0,0,0,0,0,0,0,0,0,0,0,0,0,0,0,0,0,0,0,0,0,0,0,0,0…	AW257878	AW257878	chr09	121559248	Inconsistent
576	gnp_AW330983	mu	MAGI_108005	chr01	145.6	0	-	-	Genoplante Map	0,0,0,0,1,0,2,2,0,1,0,1,0,1,1,1,2,0,0,1,1,2,2,1,0,1,2,1,1,2,2,1,1,1,0,0,2,0,0,0,0,0,1,2,0,0,2,1,0,1,1,0,0,1,0,1,2,0,0,0,0,1,1,0,0,0,0,0,1,2,0,2,0,0,0,0,0,0,0,0,0,0,0,0,0,0,0,0,0,0,0,0,0,0,0,0,0,0,0,0,0,0,0,0,0,0,0,0,0,0,0,0,0,0,0,0,0,0,0,0,0,0,0,0,0,0,0,0,0,0,0,0,0,0,0,0,0,0,0,0,0,0,0,0,0,0,0,0,0,0,0,0,0,0,0,0,0,0,0,0,0,0,0,0,0,0,0,0,0,0,0,0,0,0,0,0,0,0,0,0,0,0,0,0,0,0,0,0,0,0,0,0,0,0,0,0,0,0,0,0…	AW330983	AW330983	chr01	80379512	Consistent
577	gnp_QBL4d08	mu	MAGI_108005	chr01	145.6	0	-	-	Genoplante Map	1,0,0,0,1,0,2,2,0,1,0,1,0,1,1,1,2,0,0,1,1,2,2,1,0,1,2,1,1,2,2,1,1,0,0,0,2,0,0,0,0,0,1,2,0,0,2,1,0,1,1,0,0,1,0,1,2,0,0,0,0,1,1,0,0,0,0,0,1,2,0,2,0,0,0,0,0,0,0,0,0,0,0,0,0,0,0,0,0,0,0,0,0,0,0,0,0,0,0,0,0,0,0,0,0,0,0,0,0,0,0,0,0,0,0,0,0,0,0,0,0,0,0,0,0,0,0,0,0,0,0,0,0,0,0,0,0,0,0,0,0,0,0,0,0,0,0,0,0,0,0,0,0,0,0,0,0,0,0,0,0,0,0,0,0,0,0,0,0,0,0,0,0,0,0,0,0,0,0,0,0,0,0,0,0,0,0,0,0,0,0,0,0,0,0,0,0,0,0,0…	CF015371	CF015371	chr01	84938992	Consistent
578	gnp_QAE7c04	mu	MAGI_108005	chr01	145.6	2.6	-	-	Genoplante Map	2,0,0,0,1,0,2,2,0,1,0,1,0,1,1,1,2,0,0,1,1,2,2,1,0,1,2,1,2,2,0,1,0,1,0,0,2,0,0,0,0,0,2,2,0,0,2,1,0,0,1,0,0,0,0,1,2,0,0,0,0,1,1,0,0,0,0,0,1,2,0,2,0,0,0,0,0,0,0,0,0,0,0,0,0,0,0,0,0,0,0,0,0,0,0,0,0,0,0,0,0,0,0,0,0,0,0,0,0,0,0,0,0,0,0,0,0,0,0,0,0,0,0,0,0,0,0,0,0,0,0,0,0,0,0,0,0,0,0,0,0,0,0,0,0,0,0,0,0,0,0,0,0,0,0,0,0,0,0,0,0,0,0,0,0,0,0,0,0,0,0,0,0,0,0,0,0,0,0,0,0,0,0,0,0,0,0,0,0,0,0,0,0,0,0,0,0,0,0,0…	CD975646	CD975646	chr01	83198274	Consistent
579	IDP3851	sk	-	chr01	148	0	Co-Dominant	Size	ISU Map7	1,2,0,1,1,1,2,2,0,1,1,1,1,1,1,1,2,0,0,1,1,2,2,1,2,1,2,1,1,2,2,1,1,1,0,0,2,2,0,2,1,1,1,2,1,2,2,1,1,1,1,2,1,1,2,1,2,0,0,2,1,1,1,0,1,1,1,1,0,2,1,2,1,2,1,2,0,2,2,1,1,0,2,1,2,1,2,1,2,2,1,2,2,1,2,1,1,2,1,2,2,1,0,1,1,2,2,2,2,0,2,1,2,1,2,1,2,2,0,1,1,2,1,2,0,0,1,2,1,1,1,2,0,1,0,1,1,2,1,0,2,2,1,1,1,2,2,2,1,1,2,0,1,1,1,1,2,0,0,0,2,2,0,2,1,2,2,2,1,0,0,0,2,0,1,1,1,0,1,1,2,1,2,1,2,1,2,1,0,2,2,1,2,2,1,2,1,1,1,2…	MAGIv3.1_10496	MAGIv3.1_10496	chr01	81358743	Consistent
580	IDP3940	mu	IDP3851	chr01	148	0.8	Co-Dominant	Size	ISU Map7	1,2,0,1,1,1,2,2,0,1,1,1,1,1,1,1,2,0,0,1,1,2,2,1,2,1,2,1,1,2,2,1,1,1,0,0,2,2,0,2,1,1,1,1,1,2,2,1,1,1,1,2,1,1,2,1,2,0,0,2,1,1,1,0,1,1,1,1,0,2,1,2,1,2,1,2,0,2,2,1,1,0,2,1,2,1,2,1,2,2,1,2,2,1,2,1,1,2,1,2,2,1,0,1,1,2,2,2,2,0,2,1,2,1,2,1,2,2,0,1,1,2,1,2,0,0,1,2,1,1,1,2,0,1,0,1,1,2,1,0,2,2,1,1,1,2,2,2,1,1,2,0,1,1,1,1,2,0,0,0,2,2,0,2,1,2,2,2,1,0,0,0,2,0,1,1,1,0,1,1,2,1,2,1,2,1,2,1,0,2,2,1,2,2,1,2,1,1,1,2…	MAGIv3.1_10496	MAGIv3.1_10496	chr01	81358743	Consistent
581	IDP7799	mu	IDP3851	chr01	148	1.7	Co-Dominant	Size	ISU Map7	1,2,0,1,1,1,2,2,0,1,1,1,1,1,1,1,2,0,0,1,1,2,2,1,2,1,2,1,1,2,2,1,1,1,0,0,2,2,0,2,1,1,1,2,1,2,2,1,1,1,2,2,1,2,2,1,2,0,0,2,1,1,1,0,1,1,1,1,0,1,2,2,1,2,1,2,0,2,2,1,1,0,2,1,2,1,2,1,2,2,1,2,2,1,2,1,1,2,1,2,2,1,0,1,1,2,2,2,2,0,1,1,2,1,2,1,2,2,0,1,1,2,1,2,0,0,1,2,1,1,1,2,0,1,0,1,1,2,1,0,2,2,1,1,1,2,2,2,1,1,2,0,1,1,1,1,2,0,0,0,1,2,0,1,1,2,2,2,1,0,0,0,2,0,1,1,1,0,1,1,2,1,2,1,2,1,2,1,0,2,2,1,2,2,1,2,1,1,1,2…	MAGIv3.1_3019	MAGIv3.1_3019	chr01	80702964	Consistent
582	IDP7826	mu	IDP3851	chr01	148	2.6	Dominant	+/-	ISU Map7	1,2,0,1,1,1,2,2,0,1,1,1,1,1,1,1,2,0,0,1,1,2,2,1,2,1,2,1,1,2,2,1,1,1,0,0,2,2,0,2,1,1,1,2,1,2,2,1,2,1,1,2,1,1,2,1,2,0,0,2,1,1,1,0,1,1,1,1,0,0,2,1,2,1,2,1,0,1,1,2,1,0,2,1,2,1,2,1,2,2,1,2,2,1,2,1,1,2,1,2,2,1,0,1,1,0,2,2,2,0,1,1,2,2,2,1,2,2,0,1,1,2,1,2,0,0,1,2,1,1,1,2,0,1,0,1,1,2,1,0,2,2,1,1,1,0,2,2,1,1,2,0,1,1,1,1,2,0,0,0,0,2,0,0,1,2,2,2,1,0,0,0,2,0,1,1,1,0,1,1,2,1,2,1,2,1,2,1,0,2,2,1,1,2,1,2,1,1,1,2…	MAGIv3.1_7138	-	-	-	-
583	IDP5940	mu	IDP3851	chr01	148	2.3	Dominant	+/-	ISU Map7	1,2,2,1,1,1,2,2,0,1,1,2,1,1,1,1,2,0,0,1,1,2,2,1,2,1,2,1,1,2,2,1,1,1,0,0,2,2,0,2,1,1,1,2,1,2,2,1,2,1,1,2,1,1,2,1,2,0,0,2,1,1,1,0,1,1,1,1,0,1,1,2,1,2,1,2,0,2,2,1,1,0,2,1,2,1,2,1,2,2,1,2,2,1,2,1,1,2,1,2,2,1,0,1,1,2,2,2,2,0,2,1,2,1,2,1,2,2,0,1,1,2,1,2,0,0,1,2,1,1,1,2,0,1,0,1,1,2,1,0,2,2,1,1,1,2,2,2,1,1,2,0,1,1,1,1,2,0,2,2,1,2,0,1,2,2,2,2,1,0,0,0,2,0,1,1,1,0,1,1,2,1,2,1,2,1,2,1,0,1,2,1,2,2,2,2,2,1,2,2…	MAGIv3.1_87135	MAGIv3.1_87135	chr01	81416391	Consistent
584	IDP1986	mu	IDP3851	chr01	148	2.1	Dominant	+/-	ISU Map7	1,2,2,1,1,1,2,2,0,1,1,2,2,1,2,1,2,0,0,1,1,2,2,1,2,1,2,2,1,2,2,1,1,1,0,0,2,2,0,2,1,1,1,2,1,2,2,1,2,1,1,2,1,1,2,1,2,0,0,2,1,1,1,0,1,1,1,1,0,1,1,2,1,2,1,2,0,2,2,1,1,0,2,1,2,1,2,1,2,2,2,2,2,1,2,1,1,2,1,2,2,1,0,1,1,2,2,2,2,0,2,1,2,2,2,2,2,2,0,1,1,2,1,2,0,0,1,2,1,1,1,2,0,1,0,1,2,2,1,0,2,2,1,1,1,2,2,2,1,1,2,0,1,1,1,1,2,0,0,0,1,2,0,1,1,2,2,2,1,0,0,0,2,0,1,1,1,0,1,1,2,1,2,1,2,1,2,1,0,2,2,1,1,2,2,2,1,1,1,2…	BM078690	BM078690	chr01	82215998	Consistent
585	IDP7420	mu	IDP3851	chr01	148	1.9	Dominant	+/-	ISU Map7	1,2,2,1,1,1,2,2,0,1,1,2,1,1,1,1,2,0,0,1,1,2,2,1,2,1,2,1,1,2,2,1,1,2,0,0,2,2,0,2,1,1,1,2,1,2,2,1,2,1,1,2,1,1,2,1,2,0,0,2,1,1,1,0,1,1,1,1,0,1,1,2,1,2,1,2,0,2,2,1,1,0,2,1,2,1,2,1,2,2,1,2,2,1,2,1,1,2,1,2,2,1,0,1,1,2,2,2,2,0,1,1,2,2,2,1,2,2,0,1,1,2,1,2,0,0,1,2,1,1,1,2,0,1,0,1,1,2,1,0,2,2,1,1,1,2,2,2,1,1,2,0,1,1,2,1,2,0,0,0,2,2,0,2,1,2,2,2,1,0,0,0,2,0,1,1,1,0,1,1,2,1,2,1,2,1,2,1,0,2,2,1,1,2,1,2,2,1,1,2…	MAGIv3.1_113549	MAGIv3.1_113549	chr01	82842588	Consistent
586	IDP5898	mu	IDP3851	chr01	148	1.8	Dominant	+/-	ISU Map7	2,2,2,1,2,1,2,2,0,1,1,2,1,1,1,1,2,0,0,2,1,1,2,1,2,0,0,1,1,2,2,1,1,1,0,0,2,2,0,2,1,1,1,2,1,2,2,1,1,1,1,0,2,1,2,1,2,0,0,2,1,1,1,0,1,1,1,1,0,1,1,2,1,2,1,2,0,2,2,1,2,0,2,1,2,1,2,1,2,2,1,2,2,1,2,1,1,2,1,2,2,1,0,1,1,2,2,2,2,0,2,1,2,2,2,1,2,2,0,2,1,2,2,2,0,0,2,2,1,1,1,2,0,0,0,1,1,2,1,0,2,2,1,1,1,2,2,2,1,1,2,0,1,1,1,1,2,0,0,0,2,2,0,2,1,2,2,2,1,0,0,0,2,0,1,1,1,0,1,1,2,1,2,1,2,1,2,1,0,2,2,1,1,2,1,2,1,1,1,2…	MAGIv3.1_78904	MAGIv3.1_78904	chr01	84577349	Consistent
587	IDP6617	mu	IDP3851	chr01	148	0.3	Co-Dominant	Size	ISU Map7	1,2,0,1,1,1,2,2,0,1,1,1,1,1,1,1,2,0,0,1,1,2,2,1,2,1,2,1,1,2,2,1,1,1,0,0,2,2,0,2,1,1,1,2,1,2,2,1,1,1,1,2,1,1,2,1,2,0,0,2,1,1,1,0,1,1,1,1,0,1,1,2,1,2,1,2,0,2,2,1,1,0,2,1,2,1,2,1,2,2,1,2,2,1,2,1,1,2,1,2,2,1,0,1,1,2,2,2,2,0,1,1,2,2,2,1,2,2,0,2,1,2,1,2,0,0,1,1,1,1,1,1,0,1,0,1,1,2,1,0,2,2,1,1,1,2,2,2,1,1,2,0,1,1,1,1,2,0,0,0,1,2,0,1,1,2,2,2,1,0,0,0,2,0,1,1,1,0,1,1,2,1,2,1,2,1,2,1,0,2,2,1,1,2,1,2,1,1,1,2…	MAGIv3.1_2068	MAGIv3.1_2068	chr01	84940954	Consistent
588	IDP6887	mu	IDP3851	chr01	148	1.4	Dominant	+/-	ISU Map7	1,2,2,1,1,1,2,2,0,1,1,1,1,1,1,1,2,0,0,1,1,2,2,1,2,1,2,1,1,2,2,1,1,1,0,0,2,2,0,2,1,1,1,2,1,2,2,1,1,1,1,2,1,1,2,1,2,0,0,2,1,1,1,0,1,1,1,1,0,2,1,2,1,2,1,2,0,2,2,1,1,0,2,1,2,1,2,1,2,2,1,2,2,1,2,1,1,2,1,2,2,1,0,1,1,2,2,2,2,0,1,1,2,2,2,1,2,2,0,2,1,2,1,2,0,0,1,1,1,1,1,1,0,1,0,1,1,2,2,0,2,2,1,1,1,2,2,2,1,1,2,0,1,1,1,1,2,0,0,0,1,2,0,1,1,2,2,2,1,0,0,0,2,0,1,1,1,0,1,1,2,1,2,1,2,1,2,1,0,2,2,1,1,2,1,2,1,1,1,2…	MAGIv3.1_2068	MAGIv3.1_2068	chr01	84940954	Consistent
589	IDP7887	mu	IDP3851	chr01	148	1.4	Dominant	-/+	ISU Map7	1,2,0,1,1,1,2,2,0,1,1,1,1,1,1,1,2,0,0,1,1,2,2,1,2,1,2,1,1,2,2,1,1,1,0,0,2,2,0,2,1,1,1,2,1,2,2,1,1,1,1,2,1,1,2,1,2,0,0,2,1,1,1,0,1,1,1,1,0,2,1,2,1,2,1,2,0,2,2,1,1,0,2,1,2,1,2,1,2,2,1,2,2,1,2,1,1,2,1,2,2,1,0,1,1,2,2,2,2,0,1,1,2,2,2,1,2,2,0,2,1,2,1,2,0,0,1,2,1,1,1,2,0,1,0,1,1,2,1,0,2,2,1,1,1,2,2,2,1,1,2,0,1,1,1,1,2,0,0,0,1,2,0,1,1,2,2,2,1,0,0,0,2,0,1,1,1,0,1,1,2,1,2,1,2,1,2,1,0,2,2,1,1,2,2,2,1,1,1,2…	MAGIv3.1_14653	MAGIv3.1_14653	chr01	223357218	Inconsistent
590	TIDP6240	mu	IDP3851	chr01	148	0.7	Co-Dominant	TGCE	ISU Map7	1,0,0,0,0,0,2,2,0,1,0,1,0,1,1,2,2,0,0,1,1,2,2,1,0,1,2,1,1,0,2,1,1,1,0,0,2,2,0,0,1,0,1,2,0,2,2,1,0,1,1,0,1,1,0,1,2,0,1,0,0,1,1,0,0,0,0,0,1,2,1,1,0,2,0,0,0,0,0,0,0,0,0,0,0,0,0,0,0,0,0,0,0,0,0,0,0,0,0,0,0,0,0,0,0,0,0,0,0,0,0,0,0,0,0,0,0,0,0,0,0,0,0,0,0,0,0,0,0,0,0,0,0,0,0,0,0,0,0,0,0,0,0,0,0,0,0,0,0,0,0,0,0,0,0,0,0,0,0,0,0,0,0,0,0,0,0,0,0,0,0,0,0,0,0,0,0,0,0,0,0,0,0,0,0,0,0,0,0,0,0,0,0,0,0,0,0,0,0,0…	MAGIv3.1_24491	MAGIv3.1_24491	chr01	83532674	Consistent
591	isu81	mu	IDP3851	chr01	148	0	-	-	Genoplante Map	1,0,0,0,1,0,2,2,0,1,0,1,0,1,1,0,2,0,0,1,1,2,2,1,0,1,2,1,1,2,2,0,1,1,0,0,2,2,0,0,1,0,1,2,0,2,2,1,0,1,1,0,1,1,0,1,2,0,1,0,0,1,1,0,0,0,0,0,1,2,1,1,0,2,0,0,0,0,0,0,0,0,0,0,0,0,0,0,0,0,0,0,0,0,0,0,0,0,0,0,0,0,0,0,0,0,0,0,0,0,0,0,0,0,0,0,0,0,0,0,0,0,0,0,0,0,0,0,0,0,0,0,0,0,0,0,0,0,0,0,0,0,0,0,0,0,0,0,0,0,0,0,0,0,0,0,0,0,0,0,0,0,0,0,0,0,0,0,0,0,0,0,0,0,0,0,0,0,0,0,0,0,0,0,0,0,0,0,0,0,0,0,0,0,0,0,0,0,0,0…	-	-	-	-	-
592	TIDP7103	mu	IDP3851	chr01	148	1.1	Co-Dominant	TGCE	ISU Map7	1,0,0,0,1,0,2,2,0,1,0,1,0,1,1,2,2,0,0,1,1,2,2,1,0,1,2,1,1,2,2,1,1,1,0,0,2,2,0,0,1,0,1,2,0,2,2,1,0,1,1,0,0,1,0,1,2,0,1,0,0,1,1,0,0,0,0,0,1,2,1,0,0,2,0,0,0,0,0,0,0,0,0,0,0,0,0,0,0,0,0,0,0,0,0,0,0,0,0,0,0,0,0,0,0,0,0,0,0,0,0,0,0,0,0,0,0,0,0,0,0,0,0,0,0,0,0,0,0,0,0,0,0,0,0,0,0,0,0,0,0,0,0,0,0,0,0,0,0,0,0,0,0,0,0,0,0,0,0,0,0,0,0,0,0,0,0,0,0,0,0,0,0,0,0,0,0,0,0,0,0,0,0,0,0,0,0,0,0,0,0,0,0,0,0,0,0,0,0,0…	CG852319	CG852319	chr01	86233684	Consistent
593	IDP4235	sk	-	chr01	149.7	0	Co-Dominant	Size	ISU Map7	1,2,0,1,1,1,2,2,0,1,1,1,1,1,1,1,2,0,0,1,1,2,2,1,2,1,2,1,1,2,2,1,1,1,0,0,2,2,0,2,1,0,1,2,1,2,2,1,1,1,2,2,1,1,2,1,2,0,0,2,1,1,1,0,1,1,1,1,0,2,1,1,2,2,1,2,0,2,2,2,1,0,2,1,2,1,2,1,2,2,1,2,2,1,2,1,1,2,1,2,2,2,0,1,1,2,2,2,2,0,2,1,2,2,2,1,2,2,0,2,1,2,1,2,0,0,1,1,1,1,1,0,0,1,0,1,1,2,1,0,2,2,1,1,1,2,2,2,1,1,2,0,1,1,1,1,2,0,0,0,2,2,0,2,1,2,2,2,1,0,0,0,2,0,1,1,1,0,1,1,2,2,2,1,2,1,2,1,0,2,2,1,1,2,1,2,0,1,1,2…	MAGIv3.1_82664	MAGIv3.1_82664	chr01	90410981	Consistent
594	IDP7943	mu	IDP4235	chr01	149.7	1.9	Dominant	+/-	ISU Map7	1,2,2,1,1,1,2,2,0,1,1,1,1,1,1,1,2,0,0,1,1,2,2,1,2,1,2,1,1,2,2,1,1,1,0,0,2,2,0,2,1,1,1,2,1,2,2,1,1,1,2,2,1,1,2,1,2,0,0,2,1,1,1,0,1,1,1,1,0,2,1,1,2,2,1,2,0,2,2,2,1,0,2,1,2,1,2,1,2,2,1,2,2,1,2,1,1,2,1,2,2,2,0,1,1,2,2,2,2,0,1,1,2,1,2,1,2,2,0,2,1,2,1,2,0,0,1,1,1,1,1,1,0,1,0,1,1,2,1,0,2,2,1,1,1,2,2,2,1,1,2,0,1,1,1,1,2,0,2,2,1,2,0,1,1,2,2,2,1,0,0,0,2,0,1,1,1,0,1,1,2,2,2,1,2,1,2,1,0,2,2,1,1,2,1,2,1,1,1,2…	MAGIv3.1_19093	MAGIv3.1_19093	chr01	90444941	Consistent
595	IDP5876	mu	IDP4235	chr01	149.7	5	Dominant	+/-	ISU Map7	1,2,2,1,1,1,2,2,0,1,1,2,2,1,1,1,2,0,0,1,1,2,2,1,2,1,2,1,1,2,2,1,1,1,0,0,2,2,0,2,1,1,1,2,1,2,2,1,1,1,2,2,1,1,2,1,2,0,0,2,1,1,1,0,1,1,1,1,0,1,1,1,2,2,1,2,0,2,2,2,1,0,2,1,2,1,2,1,1,1,1,2,1,1,1,1,1,2,1,2,2,2,0,1,1,2,2,2,2,0,1,1,2,1,2,1,2,1,0,2,1,2,1,2,0,0,1,1,1,1,1,1,0,1,0,1,1,2,1,0,2,2,1,1,1,2,2,2,1,1,2,0,1,1,1,1,2,0,0,0,1,2,0,1,1,2,2,2,1,0,0,0,2,0,1,1,1,0,1,1,2,2,1,1,2,1,2,1,0,2,1,1,1,2,1,2,1,1,1,2…	MAGIv3.1_74873	MAGIv3.1_74873	chr01	90439518	Consistent
596	IDP1605	mu	IDP4235	chr01	149.7	4.6	Dominant	+/-	ISU Map7	1,2,2,1,1,1,2,2,0,1,1,1,1,1,1,1,2,0,0,1,1,2,2,2,2,1,2,1,1,2,2,2,1,1,0,0,2,2,0,2,1,1,1,2,2,2,2,1,1,1,1,2,2,1,2,2,2,0,0,2,1,1,1,0,1,1,1,1,0,2,1,1,2,2,1,2,0,2,2,1,2,0,2,2,2,1,2,2,2,2,2,2,2,1,2,1,2,2,2,2,2,2,0,2,1,2,2,2,2,0,2,1,2,1,2,1,2,2,0,2,1,2,1,2,0,0,1,1,1,1,1,1,0,2,0,1,1,2,1,0,2,2,1,2,1,2,2,2,1,1,2,0,1,1,1,1,2,0,2,2,1,2,0,1,1,2,2,2,1,0,0,0,2,0,1,2,1,0,1,1,2,2,2,1,2,1,2,2,0,1,2,1,1,2,1,2,1,1,1,2…	MEC_29003_P95-Mar06	MEC_29003_P95-Mar06	chr01	86389699	Consistent
597	IDP8399	mu	IDP4235	chr01	149.7	2.8	Dominant	+/-	ISU Map7	1,2,0,1,1,1,1,2,0,1,1,1,1,1,1,1,2,0,0,1,1,2,2,2,2,1,2,1,1,2,2,1,1,1,0,0,2,2,0,2,1,1,1,2,1,2,2,1,1,1,2,2,1,1,2,1,2,0,0,2,1,1,1,0,2,1,1,1,0,1,1,2,2,2,1,2,0,2,2,2,1,0,2,1,2,1,2,1,2,2,1,2,2,1,2,1,1,2,1,2,2,2,0,2,1,2,2,2,2,0,1,1,2,1,2,1,2,2,0,2,1,2,1,2,0,0,1,1,1,1,1,1,0,1,0,1,1,2,1,0,2,2,1,1,1,2,2,2,1,1,2,0,1,1,2,1,2,0,2,2,2,2,0,2,1,2,2,2,1,0,0,0,2,0,1,1,1,0,1,1,2,2,1,1,2,1,2,1,0,1,2,1,1,2,1,2,1,1,1,2…	MAGIv3.1_58657	MAGIv3.1_58657	chr01	91675000	Consistent
598	IDP4792	mu	IDP4235	chr01	149.7	2.7	Dominant	+/-	ISU Map7	1,2,2,1,1,1,1,2,0,1,1,1,2,1,1,2,2,0,0,1,1,2,2,1,2,2,2,1,1,2,2,1,1,2,0,0,1,1,0,2,1,1,1,2,2,2,2,1,1,2,2,2,1,1,2,1,2,0,0,2,1,1,1,0,2,1,1,1,0,1,1,2,2,2,1,2,0,2,2,2,2,0,2,1,2,2,2,1,2,2,1,2,2,1,2,1,1,2,1,2,2,2,0,2,1,2,2,2,2,0,2,1,2,2,2,1,2,2,0,2,1,2,1,2,0,0,1,1,1,1,1,1,0,2,0,1,1,2,1,0,2,1,1,1,1,2,2,2,1,1,2,0,1,1,2,1,2,0,2,2,2,2,0,1,1,2,2,2,1,0,0,0,2,0,1,1,1,0,1,1,2,1,2,1,2,1,2,1,0,2,2,1,1,2,1,2,1,1,1,2…	MAGIv3.1_22977	MAGIv3.1_22977	chr01	86993426	Consistent
599	IDP5863	mu	IDP4235	chr01	149.7	3.8	Dominant	+/-	ISU Map7	1,2,2,2,2,1,1,2,0,1,2,2,2,2,2,1,2,0,0,1,1,2,2,1,2,1,2,1,1,2,2,1,1,1,0,0,2,1,0,2,1,1,1,2,1,2,2,1,1,1,2,2,1,1,2,1,2,0,0,2,1,1,1,0,2,1,1,1,0,1,1,2,2,2,1,2,0,2,2,2,1,0,2,1,2,1,2,1,2,2,1,2,2,1,2,1,1,2,1,2,2,2,0,2,1,2,2,2,2,0,1,1,2,2,2,1,2,2,0,2,1,2,1,2,0,0,1,1,1,1,1,1,0,1,0,1,1,2,1,0,2,1,1,1,1,2,2,2,1,1,2,0,1,1,2,1,2,0,2,2,1,2,0,1,1,2,2,2,1,0,0,0,2,0,1,1,1,0,1,1,2,2,2,1,2,1,2,1,0,2,2,1,1,2,1,2,1,1,1,2…	MAGIv3.1_72465	MAGIv3.1_72465	chr01	93445835	Consistent
600	MAGI_53988	mu	IDP4235	chr01	149.7	2.7	-	SNP	ISU SNP Map	1,2,0,1,1,1,1,2,0,1,2,1,1,1,1,1,2,0,0,1,1,1,2,1,2,1,0,1,1,2,2,1,1,1,0,0,2,1,0,0,1,1,1,2,1,1,1,1,1,1,0,2,1,1,2,1,2,0,0,2,1,1,1,0,0,1,2,0,0,2,1,1,2,2,1,2,0,2,2,2,1,0,1,1,2,1,2,1,2,2,1,2,2,2,2,1,1,2,1,2,2,2,0,2,1,2,0,2,2,0,1,1,2,1,2,1,2,2,0,2,2,2,1,1,0,0,1,1,1,1,1,1,0,1,0,1,1,2,1,0,2,2,1,1,0,2,2,2,1,2,1,0,1,1,1,1,2,0,0,0,2,2,0,1,1,0,2,2,1,0,0,0,2,0,1,1,1,0,1,1,2,2,2,2,2,1,2,1,0,2,2,1,1,2,1,2,1,1,1,2…	MAGIv3.1_53988	-	-	-	-
601	IDP8097	sk	-	chr01	151	0	Co-Dominant	Size	ISU Map7	1,2,0,1,1,1,1,2,0,1,1,1,1,1,1,1,2,0,0,1,1,2,2,1,2,1,2,1,1,2,2,1,1,1,0,0,2,1,0,2,1,1,1,2,1,2,2,1,1,1,2,2,1,1,2,1,2,0,0,2,1,1,1,0,2,1,1,1,0,2,1,2,2,2,1,2,0,2,2,2,1,0,2,1,2,1,2,1,2,2,1,2,2,1,2,1,1,2,1,2,2,2,0,2,1,2,2,0,2,0,2,1,2,2,2,1,2,2,0,2,1,2,1,2,0,0,1,1,1,1,1,2,0,1,0,1,1,2,1,0,2,2,1,1,1,2,2,2,1,1,2,0,1,1,1,1,2,0,0,0,2,2,0,2,1,2,2,2,1,0,0,0,2,0,1,1,1,0,1,1,2,2,2,1,2,1,2,1,0,2,2,1,1,2,1,2,1,1,1,2…	MAGIv3.1_28667	MAGIv3.1_28667	chr01	92645229	Consistent
602	IDP4925	mu	IDP8097	chr01	151	3.6	Dominant	+/-	ISU Map7	1,2,2,1,1,1,1,2,0,1,1,1,1,1,1,1,2,0,0,1,1,2,2,2,2,1,2,1,1,2,2,1,1,1,0,0,2,2,0,2,1,1,1,2,1,2,2,1,1,1,2,2,1,1,2,1,2,0,0,2,1,1,1,0,2,1,1,1,0,2,1,2,2,2,1,2,0,2,2,1,1,0,2,1,2,1,2,1,2,2,1,2,2,1,2,1,1,2,1,2,2,2,0,2,1,2,2,2,2,0,2,1,2,2,2,1,2,2,0,2,1,2,1,2,0,0,1,1,1,1,1,1,0,1,0,1,1,2,1,0,2,2,1,1,1,2,2,2,1,1,2,0,1,1,1,1,2,0,0,0,2,2,0,2,1,2,2,2,1,0,0,0,2,0,1,1,1,0,1,1,2,2,2,1,2,1,2,1,0,2,2,2,1,1,2,1,2,1,1,1…	MAGIv3.1_48530	MAGIv3.1_48530	chr01	91508438	Consistent
603	MAGI_104824	mu	IDP8097	chr01	151	2	-	SNP	ISU SNP Map	1,2,0,1,1,1,1,2,0,1,0,1,1,1,1,2,2,0,0,1,1,2,2,1,2,1,2,1,1,2,2,1,1,1,0,0,2,1,0,0,1,1,1,2,1,2,2,1,1,1,2,2,1,1,2,1,2,0,0,2,1,1,1,0,2,1,0,0,0,2,1,1,2,2,1,2,0,2,2,2,2,0,2,1,2,2,2,1,2,2,1,1,2,0,2,1,1,2,1,2,2,2,0,2,1,2,2,2,2,0,1,1,2,2,2,1,2,2,0,2,0,2,1,2,0,0,1,1,1,1,1,1,0,1,0,1,1,2,1,0,2,1,1,1,0,2,2,2,1,0,2,0,1,1,2,1,2,0,0,0,1,2,0,1,1,2,2,2,1,0,0,0,2,0,1,1,1,0,1,1,2,2,2,0,2,1,2,1,0,2,2,1,1,2,1,2,1,1,1,2…	MAGIv3.1_104824	MAGIv3.1_104824	chr01	93673180	Consistent
604	IDP4472	mu	IDP8097	chr01	151	2.2	Dominant	+/-	ISU Map7	1,2,2,1,1,1,1,2,0,1,1,1,1,1,1,2,2,0,0,1,1,2,2,1,2,1,2,1,1,2,2,1,1,1,0,0,2,1,0,2,1,1,1,2,2,2,2,1,1,2,2,2,1,1,2,1,2,0,0,2,1,1,1,0,2,1,1,1,0,1,1,2,2,2,1,2,0,2,2,2,2,0,2,1,2,2,2,1,2,2,1,2,2,1,2,1,1,2,1,2,2,2,0,2,1,2,2,2,2,0,1,1,2,1,2,1,2,1,0,2,1,2,1,2,0,0,1,1,1,1,1,1,0,1,0,1,1,2,1,0,2,1,1,1,1,2,2,2,1,1,2,0,1,1,2,1,2,0,0,0,1,2,0,1,1,2,2,2,1,0,0,0,2,0,1,1,1,0,1,1,2,2,1,1,2,1,2,1,0,2,2,1,1,2,1,2,1,1,1,2…	MAGIv3.1_73168	-	-	-	-
605	TIDP6457	mu	IDP8097	chr01	151	0.7	Co-Dominant	TGCE	ISU Map7	1,0,0,0,1,0,1,2,0,1,0,1,0,1,1,0,2,0,0,1,0,2,2,1,0,1,2,1,1,2,2,1,1,1,0,0,2,1,0,0,1,0,1,2,0,2,2,1,0,2,2,0,1,1,0,1,2,0,1,0,0,1,1,0,0,0,0,0,1,0,1,2,0,2,0,0,0,0,0,0,0,0,0,0,0,0,0,0,0,0,0,0,0,0,0,0,0,0,0,0,0,0,0,0,0,0,0,0,0,0,0,0,0,0,0,0,0,0,0,0,0,0,0,0,0,0,0,0,0,0,0,0,0,0,0,0,0,0,0,0,0,0,0,0,0,0,0,0,0,0,0,0,0,0,0,0,0,0,0,0,0,0,0,0,0,0,0,0,0,0,0,0,0,0,0,0,0,0,0,0,0,0,0,0,0,0,0,0,0,0,0,0,0,0,0,0,0,0,0,0…	MAGIv3.1_108737	MAGIv3.1_108737	chr01	94005889	Consistent
606	TIDP4574	mu	IDP8097	chr01	151	0.7	Co-Dominant	TGCE	ISU Map7	1,0,0,0,1,0,1,2,0,1,0,1,0,1,1,2,2,0,0,1,1,2,2,1,0,1,2,1,1,2,2,1,1,1,0,0,2,1,0,0,1,0,1,2,0,2,2,1,0,2,2,0,1,1,0,1,2,0,0,0,0,1,0,0,0,0,0,0,1,2,1,2,0,2,0,0,0,0,0,0,0,0,0,0,0,0,0,0,0,0,0,0,0,0,0,0,0,0,0,0,0,0,0,0,0,0,0,0,0,0,0,0,0,0,0,0,0,0,0,0,0,0,0,0,0,0,0,0,0,0,0,0,0,0,0,0,0,0,0,0,0,0,0,0,0,0,0,0,0,0,0,0,0,0,0,0,0,0,0,0,0,0,0,0,0,0,0,0,0,0,0,0,0,0,0,0,0,0,0,0,0,0,0,0,0,0,0,0,0,0,0,0,0,0,0,0,0,0,0,0…	MAGIv3.1_85704	MAGIv3.1_85704	chr01	86661546	Consistent
607	isu73	mu	IDP8097	chr01	151	1.2	-	-	Genoplante Map	1,0,0,0,1,0,1,2,0,1,0,1,0,1,1,2,2,0,0,1,1,2,2,1,0,1,2,1,1,2,2,1,1,1,0,0,2,1,0,0,1,0,1,2,0,2,2,1,0,2,2,0,1,1,0,1,2,0,1,0,0,1,1,0,0,0,0,0,1,2,1,1,0,2,0,0,0,0,0,0,0,0,0,0,0,0,0,0,0,0,0,0,0,0,0,0,0,0,0,0,0,0,0,0,0,0,0,0,0,0,0,0,0,0,0,0,0,0,0,0,0,0,0,0,0,0,0,0,0,0,0,0,0,0,0,0,0,0,0,0,0,0,0,0,0,0,0,0,0,0,0,0,0,0,0,0,0,0,0,0,0,0,0,0,0,0,0,0,0,0,0,0,0,0,0,0,0,0,0,0,0,0,0,0,0,0,0,0,0,0,0,0,0,0,0,0,0,0,0,0…	-	-	-	-	-
608	umc2025	mu	IDP8097	chr01	151	1.7	-	-	MMP	1,0,2,0,1,0,1,2,1,1,1,1,1,1,1,2,0,0,2,1,1,2,2,1,2,1,2,1,1,2,2,2,0,1,1,1,2,0,0,0,1,2,1,0,0,0,2,2,0,0,2,2,1,1,2,0,2,2,2,0,0,1,1,0,0,0,2,0,1,2,0,0,0,2,0,2,2,2,0,2,2,2,2,1,0,2,2,0,2,1,1,1,0,1,2,0,0,2,1,0,2,2,1,0,1,2,2,0,2,1,0,1,0,0,2,1,2,2,2,2,1,2,1,2,0,2,1,1,1,1,0,0,1,1,1,0,1,2,1,0,2,0,1,1,1,2,0,2,1,0,2,2,1,0,2,1,2,2,2,2,0,2,1,1,2,2,0,2,1,2,1,1,2,1,1,1,1,2,1,1,2,2,2,1,2,1,1,1,2,0,2,2,1,2,1,2,0,1,1,2…	CC782369,AW037193,AY112069,AC204084,AI891276,AC209978	AW037193,AY112069,AI891276	chr01	1552209	Inconsistent
609	lim497	mu	IDP8097	chr01	151	0.7	-	-	MMP	1,0,2,0,1,0,1,2,1,1,1,1,1,0,1,2,2,1,1,2,1,2,2,1,1,1,2,1,1,2,2,1,1,1,1,1,2,1,1,2,1,1,1,2,1,2,2,1,0,1,2,2,1,1,2,1,2,2,1,0,0,1,1,2,0,0,1,0,1,2,2,2,0,2,1,2,2,2,0,2,1,1,2,1,0,1,2,1,2,2,1,2,0,1,2,0,0,2,1,0,2,2,1,0,1,2,2,0,2,1,1,1,0,2,2,1,2,2,2,2,1,2,1,2,1,2,1,1,1,1,0,0,1,1,1,0,1,2,1,0,2,0,1,1,1,2,0,2,1,0,2,2,1,0,2,1,2,2,2,2,0,2,1,1,2,2,0,2,1,2,1,1,2,1,0,1,1,2,1,1,2,2,2,1,2,1,1,1,2,0,2,2,1,2,1,2,0,1,1,2…	-	-	-	-	-
610	TIDP7051	sk	-	chr01	152.4	0	Co-Dominant	TGCE	ISU Map7	1,0,0,0,1,0,1,2,0,1,0,1,0,1,1,2,2,0,0,1,1,2,2,1,0,1,2,1,1,2,2,1,1,1,0,0,2,1,0,0,1,0,1,2,0,2,2,1,0,1,2,0,1,1,0,1,2,0,1,0,0,1,1,0,0,0,0,0,1,2,1,0,0,2,0,0,0,0,0,0,0,0,0,0,0,0,0,0,0,0,0,0,0,0,0,0,0,0,0,0,0,0,0,0,0,0,0,0,0,0,0,0,0,0,0,0,0,0,0,0,0,0,0,0,0,0,0,0,0,0,0,0,0,0,0,0,0,0,0,0,0,0,0,0,0,0,0,0,0,0,0,0,0,0,0,0,0,0,0,0,0,0,0,0,0,0,0,0,0,0,0,0,0,0,0,0,0,0,0,0,0,0,0,0,0,0,0,0,0,0,0,0,0,0,0,0,0,0,0,0…	MAGIv3.1_80100	MAGIv3.1_80100	chr01	92746910	Consistent
611	TIDP6092	sk	-	chr01	152.4	0	Co-Dominant	TGCE	ISU Map7	1,0,0,0,1,0,1,2,0,1,0,1,0,1,1,2,2,0,0,1,1,2,2,1,0,1,2,1,1,2,2,1,1,1,0,0,2,1,0,0,1,0,1,2,0,2,2,1,0,1,2,0,1,1,0,1,2,0,1,0,0,1,1,0,0,0,0,0,1,0,1,2,0,2,0,0,0,0,0,0,0,0,0,0,0,0,0,0,0,0,0,0,0,0,0,0,0,0,0,0,0,0,0,0,0,0,0,0,0,0,0,0,0,0,0,0,0,0,0,0,0,0,0,0,0,0,0,0,0,0,0,0,0,0,0,0,0,0,0,0,0,0,0,0,0,0,0,0,0,0,0,0,0,0,0,0,0,0,0,0,0,0,0,0,0,0,0,0,0,0,0,0,0,0,0,0,0,0,0,0,0,0,0,0,0,0,0,0,0,0,0,0,0,0,0,0,0,0,0,0…	MAGIv3.1_62051	MAGIv3.1_62051	chr01	93450431	Consistent
612	mmp61	sk	-	chr01	152.4	0	-	-	MMP	1,0,2,0,1,0,1,2,0,1,1,1,0,1,1,2,2,1,1,1,1,2,2,1,0,1,2,1,1,0,2,1,1,1,1,1,2,1,1,2,1,1,1,2,0,0,2,1,0,1,0,2,0,1,0,0,0,2,0,0,0,1,1,0,0,0,1,0,1,2,2,0,0,2,1,0,2,2,0,2,1,1,2,1,2,0,2,1,2,2,1,2,0,1,2,0,0,2,1,0,2,2,1,0,1,2,2,0,2,1,1,0,0,1,0,1,0,0,2,2,1,2,0,2,1,0,1,1,1,1,0,1,1,1,1,0,1,2,1,0,2,0,1,1,1,2,0,2,1,0,2,2,1,0,1,1,2,2,2,2,0,2,1,2,2,2,0,2,1,2,1,1,2,1,1,1,1,2,1,1,2,2,2,1,2,1,1,1,2,0,2,2,1,2,1,2,0,1,1,2…	AZ916376	AZ916376	chr01	92753039	Consistent
613	IDP751	sk	-	chr01	152.4	0	Co-Dominant	Size	ISU Map7	1,0,0,0,1,0,1,2,0,1,0,1,0,1,1,2,2,0,0,1,1,2,2,1,0,1,2,1,1,2,2,1,1,1,0,0,2,1,0,0,1,0,1,2,0,2,2,1,0,1,2,0,1,1,0,1,2,0,1,0,0,1,1,0,0,0,0,0,1,2,0,2,0,2,0,0,0,0,0,0,0,0,0,0,0,0,0,0,0,0,0,0,0,0,0,0,0,0,0,0,0,0,0,0,0,0,0,0,0,0,0,0,0,0,0,0,0,0,0,0,0,0,0,0,0,0,0,0,0,0,0,0,0,0,0,0,0,0,0,0,0,0,0,0,0,0,0,0,0,0,0,0,0,0,0,0,0,0,0,0,0,0,0,0,0,0,0,0,0,0,0,0,0,0,0,0,0,0,0,0,0,0,0,0,0,0,0,0,0,0,0,0,0,0,0,0,0,0,0,0…	MEC_71327_P95-Mar06	MEC_71327_P95-Mar06	chr01	93043333	Consistent
614	IDP4698	mu	IDP751	chr01	152.4	0.4	Dominant	+/-	ISU Map7	1,0,0,0,1,0,1,2,0,1,0,1,0,1,1,2,2,0,0,1,1,1,2,1,0,1,2,1,1,2,2,1,1,1,0,0,1,1,0,0,1,0,1,2,0,2,2,1,0,2,2,0,1,1,0,1,2,0,1,0,0,1,1,0,0,0,0,0,1,2,1,2,0,2,0,0,0,0,0,0,0,0,0,0,0,0,0,0,0,0,0,0,0,0,0,0,0,0,0,0,0,0,0,0,0,0,0,0,0,0,0,0,0,0,0,0,0,0,0,0,0,0,0,0,0,0,0,0,0,0,0,0,0,0,0,0,0,0,0,0,0,0,0,0,0,0,0,0,0,0,0,0,0,0,0,0,0,0,0,0,0,0,0,0,0,0,0,0,0,0,0,0,0,0,0,0,0,0,0,0,0,0,0,0,0,0,0,0,0,0,0,0,0,0,0,0,0,0,0,0…	MAGIv3.1_72980	MAGIv3.1_72980	chr01	86752619	Consistent
615	IDP8389	mu	IDP751	chr01	152.4	1.4	Co-Dominant	Size	ISU Map7	1,0,0,0,1,0,1,2,0,1,0,1,0,1,1,2,2,0,0,1,1,2,2,1,0,1,2,1,1,2,2,1,1,1,0,0,1,1,0,0,1,0,1,0,0,2,2,1,0,2,2,0,1,1,0,1,2,0,1,0,0,1,1,0,0,0,0,0,1,2,1,2,0,2,0,0,0,0,0,0,0,0,0,0,0,0,0,0,0,0,0,0,0,0,0,0,0,0,0,0,0,0,0,0,0,0,0,0,0,0,0,0,0,0,0,0,0,0,0,0,0,0,0,0,0,0,0,0,0,0,0,0,0,0,0,0,0,0,0,0,0,0,0,0,0,0,0,0,0,0,0,0,0,0,0,0,0,0,0,0,0,0,0,0,0,0,0,0,0,0,0,0,0,0,0,0,0,0,0,0,0,0,0,0,0,0,0,0,0,0,0,0,0,0,0,0,0,0,0,0…	MAGIv3.1_83390	MAGIv3.1_83390	chr01	86754944	Consistent
616	IDP5866	mu	IDP751	chr01	152.4	1.8	Dominant	+/-	ISU Map7	1,2,2,1,1,1,1,2,0,1,1,1,1,1,1,2,2,0,0,1,1,2,2,1,1,1,2,1,1,2,2,1,1,1,0,0,1,1,0,2,1,1,1,2,2,2,2,1,1,2,2,2,1,1,2,1,2,0,0,2,1,1,1,0,2,1,1,1,0,1,1,2,2,2,1,2,0,2,2,2,2,0,2,1,2,2,2,1,2,2,1,2,2,1,2,1,1,2,1,2,2,2,0,2,1,2,2,2,2,0,2,1,2,2,2,1,2,2,0,2,1,2,1,2,0,0,1,1,1,2,1,1,0,1,0,1,1,2,1,0,2,1,1,1,1,2,2,2,1,1,2,0,1,1,2,1,2,0,0,0,1,2,0,1,1,2,2,2,1,0,0,0,2,0,1,1,1,0,1,1,2,1,2,1,2,1,2,1,0,2,2,1,1,2,1,2,1,1,1,2…	MAGIv3.1_73132	MAGIv3.1_73132	chr01	87397546	Consistent
617	IDP7186	mu	IDP751	chr01	152.4	0.2	Co-Dominant	Size	ISU Map7	1,2,0,1,1,1,1,2,0,1,1,1,1,1,1,2,2,0,0,1,1,2,2,1,2,1,2,2,1,2,1,1,1,1,0,0,1,1,0,2,1,1,1,2,2,2,2,1,2,2,2,2,1,1,2,1,2,0,0,2,1,1,1,0,2,1,1,1,0,2,1,2,2,2,1,2,0,2,2,2,2,0,2,1,2,2,2,1,2,2,1,2,2,1,2,1,1,2,1,2,2,2,0,2,1,2,2,2,2,0,1,1,2,1,2,1,2,2,0,2,1,2,1,2,0,0,1,1,1,1,1,0,0,1,0,1,1,2,2,0,2,1,1,1,1,2,2,1,1,1,2,0,1,1,2,1,2,0,0,0,1,1,0,1,1,2,2,2,1,0,0,0,2,0,1,1,1,0,1,1,2,1,2,1,2,1,2,1,0,2,2,1,1,2,1,2,1,1,1,2…	MAGIv3.1_33007	MAGIv3.1_33007	chr01	89292438	Consistent
618	MAGI_107844	mu	IDP751	chr01	152.4	1.1	-	SNP	ISU SNP Map	1,2,0,1,1,1,1,2,0,1,1,1,1,1,1,2,2,0,0,1,1,2,2,1,2,1,2,2,1,2,1,1,1,1,0,0,1,1,0,0,1,1,1,2,2,2,2,1,2,2,2,2,1,1,2,1,2,0,0,2,1,1,1,0,2,1,1,0,0,2,1,1,2,2,1,2,0,2,2,2,2,0,2,1,2,2,2,1,2,2,1,2,2,1,2,1,1,2,1,2,2,2,0,2,1,2,2,2,2,0,1,1,2,1,2,1,2,2,0,2,1,2,1,2,0,0,1,1,1,1,1,1,0,1,0,1,1,2,2,0,2,1,1,1,0,2,2,1,1,1,2,0,1,1,2,1,2,0,0,0,1,1,0,1,1,2,2,2,1,0,0,0,2,0,1,1,1,0,1,1,2,1,2,1,2,1,2,1,0,2,2,1,1,2,1,2,1,1,1,2…	MAGIv3.1_107844	MAGIv3.1_107844	chr01	88787133	Consistent
619	TIDP7096	mu	IDP751	chr01	152.4	2.1	Co-Dominant	TGCE	ISU Map7	1,0,0,0,1,0,1,2,0,1,0,1,0,1,1,2,2,0,0,1,1,2,2,1,0,1,2,2,1,2,1,1,1,1,0,0,1,1,0,0,1,0,1,2,0,2,2,1,0,2,2,0,1,1,0,1,2,0,1,0,0,1,1,0,0,0,0,0,1,0,1,2,0,2,0,0,0,0,0,0,0,0,0,0,0,0,0,0,0,0,0,0,0,0,0,0,0,0,0,0,0,0,0,0,0,0,0,0,0,0,0,0,0,0,0,0,0,0,0,0,0,0,0,0,0,0,0,0,0,0,0,0,0,0,0,0,0,0,0,0,0,0,0,0,0,0,0,0,0,0,0,0,0,0,0,0,0,0,0,0,0,0,0,0,0,0,0,0,0,0,0,0,0,0,0,0,0,0,0,0,0,0,0,0,0,0,0,0,0,0,0,0,0,0,0,0,0,0,0,0…	CG798154	-	-	-	-
620	TIDP7049	mu	IDP751	chr01	152.4	0	Co-Dominant	TGCE	ISU Map7	1,0,0,0,1,0,1,2,0,1,0,1,0,1,1,2,2,0,0,1,1,2,2,1,0,1,2,2,1,2,1,1,1,1,0,0,1,1,0,0,1,0,1,2,0,2,2,1,0,2,2,0,1,1,0,1,2,0,1,0,0,1,1,0,0,0,0,0,1,2,1,2,0,2,0,0,0,0,0,0,0,0,0,0,0,0,0,0,0,0,0,0,0,0,0,0,0,0,0,0,0,0,0,0,0,0,0,0,0,0,0,0,0,0,0,0,0,0,0,0,0,0,0,0,0,0,0,0,0,0,0,0,0,0,0,0,0,0,0,0,0,0,0,0,0,0,0,0,0,0,0,0,0,0,0,0,0,0,0,0,0,0,0,0,0,0,0,0,0,0,0,0,0,0,0,0,0,0,0,0,0,0,0,0,0,0,0,0,0,0,0,0,0,0,0,0,0,0,0,0…	MAGIv4.0_97308	MAGIv4.0_97308	chr01	89292972	Consistent
621	mmp39	mu	IDP751	chr01	152.4	1.6	-	-	MMP	1,0,2,0,1,0,1,2,1,1,2,0,0,0,1,2,2,1,1,2,1,2,2,1,2,1,2,2,1,2,2,1,1,1,1,1,1,1,1,2,1,1,1,2,2,2,2,1,0,2,2,2,0,1,2,0,0,2,0,0,0,1,1,1,0,0,0,0,1,2,2,2,0,0,0,0,2,2,0,2,1,2,2,1,2,0,0,1,2,2,0,0,0,1,2,0,0,0,2,0,2,2,1,0,0,2,2,0,2,1,1,0,0,0,0,1,0,0,2,0,1,0,0,0,2,0,1,2,1,1,0,2,0,0,0,0,1,1,2,1,2,0,1,1,1,2,0,1,1,0,2,1,2,0,2,1,2,2,2,0,0,2,1,1,2,2,0,2,1,2,1,1,2,1,1,1,1,2,1,1,2,1,2,1,2,1,0,1,2,0,1,2,1,2,1,2,0,1,1,2…	AZ916172	AZ916172	chr01	89237119	Consistent
622	TIDP6576	mu	IDP751	chr01	152.4	1	Co-Dominant	TGCE	ISU Map7	1,0,0,0,1,0,1,2,0,1,0,1,0,1,1,2,2,0,0,1,1,2,2,1,0,1,2,2,1,2,1,1,1,1,0,0,1,1,0,0,1,0,1,2,0,2,2,1,0,2,2,0,1,1,0,1,2,0,1,0,0,1,1,0,0,0,0,0,1,2,2,0,0,2,0,0,0,0,0,0,0,0,0,0,0,0,0,0,0,0,0,0,0,0,0,0,0,0,0,0,0,0,0,0,0,0,0,0,0,0,0,0,0,0,0,0,0,0,0,0,0,0,0,0,0,0,0,0,0,0,0,0,0,0,0,0,0,0,0,0,0,0,0,0,0,0,0,0,0,0,0,0,0,0,0,0,0,0,0,0,0,0,0,0,0,0,0,0,0,0,0,0,0,0,0,0,0,0,0,0,0,0,0,0,0,0,0,0,0,0,0,0,0,0,0,0,0,0,0,0…	MAGIv3.1_8576	MAGIv3.1_8576	chr01	89518637	Consistent
623	bnlg2123x	mu	IDP751	chr01	152.4	0	-	-	Genoplante Map	0,0,0,0,1,0,1,2,0,1,0,1,0,1,1,2,2,0,0,1,1,0,2,1,0,1,2,2,1,2,0,0,1,1,0,0,1,0,0,0,1,0,1,2,0,0,0,1,0,2,2,0,1,1,0,1,2,0,1,0,0,1,1,0,0,0,0,0,1,2,2,1,0,2,0,0,0,0,0,0,0,0,0,0,0,0,0,0,0,0,0,0,0,0,0,0,0,0,0,0,0,0,0,0,0,0,0,0,0,0,0,0,0,0,0,0,0,0,0,0,0,0,0,0,0,0,0,0,0,0,0,0,0,0,0,0,0,0,0,0,0,0,0,0,0,0,0,0,0,0,0,0,0,0,0,0,0,0,0,0,0,0,0,0,0,0,0,0,0,0,0,0,0,0,0,0,0,0,0,0,0,0,0,0,0,0,0,0,0,0,0,0,0,0,0,0,0,0,0,0…	-	-	-	-	-
624	umc1515	mu	IDP751	chr01	152.4	1	-	-	MMP	1,0,2,0,1,0,1,2,1,1,2,1,1,1,1,2,2,1,1,1,1,2,2,1,2,1,2,2,1,2,1,1,1,1,1,1,1,1,1,2,1,1,1,2,2,2,2,1,0,2,2,2,1,1,2,1,2,2,1,0,0,1,1,2,0,0,1,0,1,2,2,2,0,2,1,2,2,2,0,2,2,2,1,1,2,2,2,1,2,2,1,2,0,1,2,0,0,2,1,0,2,2,1,0,1,2,2,0,2,1,2,1,0,1,2,1,2,2,1,2,1,2,1,2,2,2,1,2,1,1,0,1,1,1,1,0,1,2,2,2,2,0,1,1,2,2,0,1,1,0,2,1,1,0,2,1,2,2,2,2,0,2,1,1,2,2,0,2,1,2,1,1,2,1,1,1,1,1,1,1,2,1,2,1,2,1,1,1,2,0,1,1,1,2,1,2,0,2,1,2…	CC742713,CC742714,AQ845212	-	-	-	-
625	IDP4538	mu	IDP751	chr01	152.4	1.4	Dominant	+/-	ISU Map7	1,0,0,0,1,0,1,2,0,1,0,1,0,1,1,2,2,0,0,1,1,1,2,1,0,1,2,2,1,2,1,1,1,1,0,0,1,1,0,0,1,0,1,2,0,2,2,1,0,2,2,0,1,1,0,1,2,0,1,0,0,1,1,0,0,0,0,0,1,2,1,2,0,2,0,0,0,0,0,0,0,0,0,0,0,0,0,0,0,0,0,0,0,0,0,0,0,0,0,0,0,0,0,0,0,0,0,0,0,0,0,0,0,0,0,0,0,0,0,0,0,0,0,0,0,0,0,0,0,0,0,0,0,0,0,0,0,0,0,0,0,0,0,0,0,0,0,0,0,0,0,0,0,0,0,0,0,0,0,0,0,0,0,0,0,0,0,0,0,0,0,0,0,0,0,0,0,0,0,0,0,0,0,0,0,0,0,0,0,0,0,0,0,0,0,0,0,0,0,0…	MAGIv3.1_38410	MAGIv3.1_38410	chr01	95153310	Consistent
626	IDP7923	sk	-	chr01	155.8	0	Dominant	-/+	ISU Map7	1,2,0,1,1,2,1,2,0,1,1,1,1,1,1,2,2,0,0,1,1,2,2,1,2,1,0,2,1,2,1,1,1,1,0,0,1,1,0,2,1,1,1,2,2,2,2,1,2,2,2,2,1,1,2,1,2,0,0,2,1,1,1,0,2,1,1,1,0,2,1,2,1,2,1,2,0,2,2,2,2,0,1,1,2,2,2,1,2,2,1,2,2,1,2,1,1,2,1,2,2,2,0,2,1,2,2,1,2,0,2,1,2,2,2,1,2,2,0,2,1,2,1,2,0,0,1,1,1,1,1,1,0,1,0,1,1,2,2,0,2,1,1,1,1,2,2,1,1,1,2,0,1,1,2,1,2,0,0,0,1,1,0,1,1,2,2,2,1,0,0,0,2,0,1,1,1,0,1,1,2,1,2,1,2,1,2,1,0,2,1,1,1,2,2,2,1,1,1,2…	MAGIv3.1_17294	MAGIv3.1_17294	chr09	110281309	Inconsistent
627	TIDP9243	mu	IDP7923	chr01	155.8	2.2	Co-Dominant	TGCE	ISU Map7	0,0,0,0,1,0,1,2,0,1,0,1,0,1,1,2,2,0,0,1,1,2,2,1,0,1,2,2,1,2,1,1,1,1,0,0,1,0,0,0,1,0,1,2,0,2,2,1,0,2,2,0,1,1,0,1,2,0,1,0,0,1,1,0,0,0,0,0,0,2,1,2,0,2,0,0,0,0,0,0,0,0,0,0,0,0,0,0,0,0,0,0,0,0,0,0,0,0,0,0,0,0,0,0,0,0,0,0,0,0,0,0,0,0,0,0,0,0,0,0,0,0,0,0,0,0,0,0,0,0,0,0,0,0,0,0,0,0,0,0,0,0,0,0,0,0,0,0,0,0,0,0,0,0,0,0,0,0,0,0,0,0,0,0,0,0,0,0,0,0,0,0,0,0,0,0,0,0,0,0,0,0,0,0,0,0,0,0,0,0,0,0,0,0,0,0,0,0,0,0…	MAGIv3.1_83710	MAGIv3.1_83710	chr01	96536930	Consistent
628	TIDP4596	mu	IDP7923	chr01	155.8	0	Co-Dominant	TGCE	ISU Map7	0,0,0,0,1,0,1,2,0,1,0,1,0,1,1,2,2,0,0,1,1,2,2,1,0,1,2,2,1,2,1,1,1,1,0,0,1,0,0,0,1,0,1,2,0,2,2,1,0,2,2,0,0,1,0,1,2,0,1,0,0,1,1,0,0,0,0,0,1,2,1,2,0,2,0,0,0,0,0,0,0,0,0,0,0,0,0,0,0,0,0,0,0,0,0,0,0,0,0,0,0,0,0,0,0,0,0,0,0,0,0,0,0,0,0,0,0,0,0,0,0,0,0,0,0,0,0,0,0,0,0,0,0,0,0,0,0,0,0,0,0,0,0,0,0,0,0,0,0,0,0,0,0,0,0,0,0,0,0,0,0,0,0,0,0,0,0,0,0,0,0,0,0,0,0,0,0,0,0,0,0,0,0,0,0,0,0,0,0,0,0,0,0,0,0,0,0,0,0,0…	MAGIv4.0_72595	MAGIv4.0_72595	chr01	95182926	Consistent
629	IDP4132	mu	IDP7923	chr01	155.8	0	Dominant	+/-	ISU Map7	1,0,0,0,1,0,1,2,0,1,0,1,0,1,1,2,2,0,0,1,1,0,2,1,0,1,2,2,1,2,1,1,1,1,0,0,1,1,0,0,1,0,1,2,0,2,2,1,0,2,2,0,1,1,0,1,2,0,1,0,0,1,1,0,0,0,0,0,1,2,1,2,0,2,0,0,0,0,0,0,0,0,0,0,0,0,0,0,0,0,0,0,0,0,0,0,0,0,0,0,0,0,0,0,0,0,0,0,0,0,0,0,0,0,0,0,0,0,0,0,0,0,0,0,0,0,0,0,0,0,0,0,0,0,0,0,0,0,0,0,0,0,0,0,0,0,0,0,0,0,0,0,0,0,0,0,0,0,0,0,0,0,0,0,0,0,0,0,0,0,0,0,0,0,0,0,0,0,0,0,0,0,0,0,0,0,0,0,0,0,0,0,0,0,0,0,0,0,0,0…	MAGIv3.1_17393	MAGIv3.1_17393	chr01	96749245	Consistent
630	TIDP5391	mu	IDP7923	chr01	155.8	0.7	Co-Dominant	TGCE	ISU Map7	1,0,0,0,1,0,1,2,0,2,0,1,0,1,1,2,2,0,0,1,1,2,2,1,0,1,2,2,1,2,1,1,1,0,0,0,1,1,0,0,1,0,1,2,0,2,2,1,0,1,2,0,1,1,0,1,0,0,1,0,0,1,2,0,0,0,0,0,1,2,1,2,0,2,0,0,0,0,0,0,0,0,0,0,0,0,0,0,0,0,0,0,0,0,0,0,0,0,0,0,0,0,0,0,0,0,0,0,0,0,0,0,0,0,0,0,0,0,0,0,0,0,0,0,0,0,0,0,0,0,0,0,0,0,0,0,0,0,0,0,0,0,0,0,0,0,0,0,0,0,0,0,0,0,0,0,0,0,0,0,0,0,0,0,0,0,0,0,0,0,0,0,0,0,0,0,0,0,0,0,0,0,0,0,0,0,0,0,0,0,0,0,0,0,0,0,0,0,0,0…	MAGIv3.1_65197	MAGIv3.1_65197	chr01	110240130	Consistent
631	TIDP7123	mu	IDP7923	chr01	155.8	0.7	Co-Dominant	TGCE	ISU Map7	1,0,0,0,1,0,1,2,0,2,0,1,0,1,1,2,2,0,0,1,1,2,2,1,0,1,2,2,1,2,1,1,1,1,0,0,1,1,0,0,1,0,1,2,0,2,2,1,0,1,2,0,0,1,0,1,2,0,1,0,0,1,2,0,0,0,0,0,1,1,1,2,0,2,0,0,0,0,0,0,0,0,0,0,0,0,0,0,0,0,0,0,0,0,0,0,0,0,0,0,0,0,0,0,0,0,0,0,0,0,0,0,0,0,0,0,0,0,0,0,0,0,0,0,0,0,0,0,0,0,0,0,0,0,0,0,0,0,0,0,0,0,0,0,0,0,0,0,0,0,0,0,0,0,0,0,0,0,0,0,0,0,0,0,0,0,0,0,0,0,0,0,0,0,0,0,0,0,0,0,0,0,0,0,0,0,0,0,0,0,0,0,0,0,0,0,0,0,0,0…	MAGIv3.1_88213	MAGIv3.1_88213	chr01	109471573	Consistent
632	TIDP4564	mu	IDP7923	chr01	155.8	0	Co-Dominant	TGCE	ISU Map7	1,0,0,0,1,0,1,2,0,2,0,1,0,1,1,2,2,0,0,1,1,2,2,1,0,1,2,2,1,2,0,1,1,1,0,0,1,1,0,0,1,0,1,2,0,2,2,1,0,0,2,0,1,1,0,1,2,0,1,0,0,1,2,0,0,0,0,0,1,1,1,2,0,2,0,0,0,0,0,0,0,0,0,0,0,0,0,0,0,0,0,0,0,0,0,0,0,0,0,0,0,0,0,0,0,0,0,0,0,0,0,0,0,0,0,0,0,0,0,0,0,0,0,0,0,0,0,0,0,0,0,0,0,0,0,0,0,0,0,0,0,0,0,0,0,0,0,0,0,0,0,0,0,0,0,0,0,0,0,0,0,0,0,0,0,0,0,0,0,0,0,0,0,0,0,0,0,0,0,0,0,0,0,0,0,0,0,0,0,0,0,0,0,0,0,0,0,0,0,0…	MAGIv3.1_75067	MAGIv3.1_75067	chr01	110973271	Consistent
633	TIDP8792	mu	IDP7923	chr01	155.8	0	Co-Dominant	TGCE	ISU Map7	1,0,0,0,1,0,1,2,0,2,0,1,0,1,1,2,2,0,0,1,1,2,2,1,0,1,2,2,1,2,1,1,1,1,0,0,1,1,0,0,1,0,1,2,0,2,2,1,0,1,2,0,1,1,0,1,2,0,1,0,0,1,2,0,0,0,0,0,1,1,1,2,0,2,0,0,0,0,0,0,0,0,0,0,0,0,0,0,0,0,0,0,0,0,0,0,0,0,0,0,0,0,0,0,0,0,0,0,0,0,0,0,0,0,0,0,0,0,0,0,0,0,0,0,0,0,0,0,0,0,0,0,0,0,0,0,0,0,0,0,0,0,0,0,0,0,0,0,0,0,0,0,0,0,0,0,0,0,0,0,0,0,0,0,0,0,0,0,0,0,0,0,0,0,0,0,0,0,0,0,0,0,0,0,0,0,0,0,0,0,0,0,0,0,0,0,0,0,0,0…	MAGIv3.1_5587	MAGIv3.1_5587	chr01	110110382	Consistent
634	TIDP5625	mu	IDP7923	chr01	155.8	0.7	Co-Dominant	TGCE	ISU Map7	1,0,0,0,1,0,1,2,0,1,0,1,0,1,1,2,2,0,0,1,1,2,2,1,0,1,0,2,0,2,0,1,1,1,0,0,1,1,0,0,1,0,1,2,0,2,2,1,0,1,2,0,1,1,0,1,2,0,1,0,0,1,1,0,0,0,0,0,1,1,1,2,0,2,0,0,0,0,0,0,0,0,0,0,0,0,0,0,0,0,0,0,0,0,0,0,0,0,0,0,0,0,0,0,0,0,0,0,0,0,0,0,0,0,0,0,0,0,0,0,0,0,0,0,0,0,0,0,0,0,0,0,0,0,0,0,0,0,0,0,0,0,0,0,0,0,0,0,0,0,0,0,0,0,0,0,0,0,0,0,0,0,0,0,0,0,0,0,0,0,0,0,0,0,0,0,0,0,0,0,0,0,0,0,0,0,0,0,0,0,0,0,0,0,0,0,0,0,0,0…	MAGIv3.1_65689	MAGIv3.1_65689	chr01	103490116	Consistent
635	IDP1457	mu	IDP7923	chr01	155.8	1.2	Dominant	+/-	ISU Map7	1,0,0,0,1,0,1,2,0,1,0,1,0,1,1,2,2,0,0,1,1,2,2,1,0,1,2,2,1,2,1,1,1,1,0,0,1,1,0,0,1,0,1,2,0,2,2,1,0,1,2,0,1,1,0,1,2,0,1,0,0,1,1,0,0,0,0,0,1,1,1,2,0,2,0,0,0,0,0,0,0,0,0,0,0,0,0,0,0,0,0,0,0,0,0,0,0,0,0,0,0,0,0,0,0,0,0,0,0,0,0,0,0,0,0,0,0,0,0,0,0,0,0,0,0,0,0,0,0,0,0,0,0,0,0,0,0,0,0,0,0,0,0,0,0,0,0,0,0,0,0,0,0,0,0,0,0,0,0,0,0,0,0,0,0,0,0,0,0,0,0,0,0,0,0,0,0,0,0,0,0,0,0,0,0,0,0,0,0,0,0,0,0,0,0,0,0,0,0,0…	MAGIv4.0_30481	MAGIv4.0_30481	chr01	102688364	Consistent
636	MAGI_85313	mu	IDP7923	chr01	155.8	2.8	-	SNP	ISU SNP Map	1,2,0,1,1,0,1,2,0,1,0,1,1,1,1,2,2,0,0,1,1,2,2,1,2,1,2,2,1,2,1,1,1,1,0,0,1,1,0,0,1,1,1,2,2,2,2,1,2,1,2,2,1,1,2,1,2,0,0,2,1,1,1,0,2,1,0,0,0,1,1,0,1,2,1,2,0,2,2,2,2,0,1,1,2,2,2,1,2,2,1,2,2,0,2,1,1,2,1,2,2,2,0,2,1,2,2,1,2,0,2,1,2,1,2,1,2,2,0,2,0,2,1,2,0,0,1,1,1,1,1,1,0,1,0,1,1,2,2,0,2,1,1,1,0,2,2,1,1,0,2,0,1,1,2,1,2,0,0,0,1,1,0,1,1,2,2,2,1,0,0,0,2,0,1,1,1,0,1,1,2,1,2,0,2,1,2,1,0,2,1,1,1,2,1,2,1,2,1,2…	MAGIv3.1_85313	MAGIv3.1_85313	chr01	101422260	Consistent
637	MAGI_95605	mu	IDP7923	chr01	155.8	0	-	SNP	ISU SNP Map	1,2,0,1,1,0,1,2,0,1,2,1,1,1,1,2,2,0,0,1,1,2,2,1,2,1,2,2,1,2,1,1,1,1,0,0,1,1,0,0,1,0,1,2,2,2,2,1,2,1,2,2,1,1,2,1,0,0,0,0,1,1,1,0,2,1,1,0,0,1,1,0,1,2,1,2,0,2,2,2,2,0,1,1,2,2,2,1,2,2,1,2,2,1,2,1,1,2,1,2,2,2,0,2,1,2,2,1,2,0,2,1,2,1,2,1,2,2,0,2,1,2,1,2,0,0,1,0,1,1,1,1,0,1,0,1,1,2,2,0,2,1,1,1,0,2,2,1,1,2,2,0,1,1,2,1,2,0,0,0,1,0,0,1,1,2,2,2,1,0,0,0,2,0,1,1,1,0,1,1,2,1,2,1,2,1,2,1,0,2,1,1,1,2,1,2,1,2,1,2…	MAGIv3.1_95605	MAGIv3.1_95605	chr01	101270792	Consistent
638	IDP831	mu	IDP7923	chr01	155.8	3	Dominant	+/-	ISU Map7	1,2,2,1,1,2,1,2,0,1,2,1,1,1,1,2,2,0,0,1,1,2,2,2,2,1,2,2,1,2,1,1,1,1,0,0,1,1,0,2,1,1,2,2,2,2,2,1,2,2,2,2,2,1,2,1,2,0,0,2,1,1,1,0,2,1,1,1,0,1,1,2,1,2,1,2,0,2,2,2,2,0,1,1,2,2,2,1,2,2,1,2,2,1,2,1,1,2,1,2,2,2,0,2,2,2,2,1,2,0,2,1,2,2,2,1,2,2,0,2,1,2,1,2,0,0,1,1,1,1,1,1,0,1,0,1,1,2,2,0,2,1,1,1,1,2,2,1,2,2,2,0,1,1,2,1,2,0,2,2,2,1,0,2,1,2,2,2,1,0,0,0,2,0,2,1,1,0,1,1,2,1,2,1,2,1,2,1,0,2,1,1,1,2,1,2,1,2,1,2…	BM337880	BM337880	chr01	101762794	Consistent
639	IDP254	sk	-	chr01	158.4	0	Co-Dominant	Size	ISU Map7	1,2,2,1,1,2,1,2,0,1,2,1,1,1,1,2,2,0,0,1,1,2,2,0,2,1,2,2,1,2,1,1,1,1,0,0,1,1,0,2,1,1,1,2,2,2,2,1,2,1,2,2,1,1,2,1,2,0,0,2,1,1,2,0,2,1,1,1,0,0,1,2,1,2,1,2,0,2,2,2,1,0,1,1,2,2,2,1,2,2,1,2,2,1,2,1,1,2,1,2,2,2,0,1,1,2,2,1,2,0,1,1,2,1,2,1,2,2,0,2,1,2,1,2,0,0,1,1,1,1,1,1,0,1,0,1,1,2,2,0,2,1,1,1,1,2,2,1,1,2,2,0,1,1,2,1,2,0,0,0,1,1,0,1,1,2,2,2,1,0,0,0,2,0,1,1,1,0,1,1,2,1,0,1,2,2,2,1,0,1,1,1,1,2,1,2,1,2,1,2…	BM334583	BM334583	chr01	107114683	Consistent
640	IDP845	mu	IDP254	chr01	158.4	0.9	Dominant	+/-	ISU Map7	1,2,2,1,1,2,1,2,0,1,2,1,1,1,1,2,2,0,0,1,1,2,2,1,2,1,2,2,1,2,1,1,1,1,0,0,1,1,0,2,1,1,1,2,2,2,2,1,2,1,2,2,1,1,2,2,2,0,0,2,1,1,2,0,2,1,1,1,0,1,1,2,1,2,1,2,0,2,2,2,1,0,1,1,2,2,2,1,2,2,1,2,2,1,2,1,1,2,1,2,2,2,0,1,1,2,2,1,2,0,2,1,2,2,2,1,2,2,0,2,1,2,1,2,0,0,1,1,1,1,1,1,0,1,0,1,1,2,2,0,2,1,1,1,1,2,2,1,1,2,2,0,1,1,2,1,2,0,0,0,1,1,0,1,1,2,2,2,1,0,0,0,2,0,1,1,1,0,1,1,2,1,2,1,2,2,2,1,0,1,1,1,1,2,1,2,1,2,1,2…	MAGIv3.1_81493	MAGIv3.1_81493	chr01	107115106	Consistent
641	IDP4552	mu	IDP254	chr01	158.4	1.5	Dominant	+/-	ISU Map7	1,2,2,1,2,2,1,2,0,2,2,1,1,1,1,2,2,0,0,1,1,2,2,1,2,1,2,2,1,2,1,1,1,1,0,0,2,1,0,2,1,2,1,2,2,2,2,1,2,1,2,2,1,1,2,1,2,0,0,2,1,2,2,0,2,1,1,1,0,1,1,2,1,2,1,2,0,2,2,2,1,0,1,1,2,2,2,1,2,2,1,2,2,1,2,1,1,2,1,2,2,2,0,1,1,2,2,1,2,0,2,1,2,2,2,1,2,2,0,2,1,2,1,2,0,0,1,1,1,1,1,1,0,1,0,1,1,2,2,0,2,1,1,1,1,2,2,1,1,2,2,0,1,1,2,1,2,0,0,0,1,1,0,1,1,2,2,2,1,0,0,0,2,0,1,1,1,0,1,1,2,1,2,1,2,2,2,1,0,1,1,1,1,2,1,2,1,2,1,2…	MAGIv3.1_49660	MAGIv3.1_49660	chr01	107542190	Consistent
642	IDP7399	mu	IDP254	chr01	158.4	1.2	Co-Dominant	Size	ISU Map7	1,2,0,1,1,2,1,2,0,2,2,1,1,1,1,2,2,0,0,1,1,2,2,1,2,1,2,2,1,1,1,1,1,1,0,0,1,1,0,1,1,1,1,2,2,1,2,1,2,1,2,2,1,1,2,1,2,0,0,2,1,1,2,0,2,1,1,1,0,1,1,2,1,2,1,2,0,2,2,2,1,0,1,1,2,2,2,1,2,2,1,2,2,2,2,1,1,2,1,2,2,2,0,1,2,2,2,1,2,0,2,2,2,2,2,1,2,2,0,2,1,2,1,2,0,0,1,1,1,1,1,1,0,1,0,1,1,2,2,0,2,1,1,1,1,2,2,1,1,2,2,0,1,1,2,1,2,0,2,2,1,1,0,1,1,2,2,2,1,0,0,0,2,0,1,1,1,0,1,1,2,1,2,1,2,2,2,1,0,1,1,1,1,2,1,2,1,2,1,2…	MAGIv3.1_105976	MAGIv3.1_105976	chr01	110105657	Consistent
643	IDP4908	mu	IDP254	chr01	158.4	0.4	Dominant	+/-	ISU Map7	1,2,2,1,1,2,1,2,0,2,2,1,1,1,1,2,2,0,0,1,1,2,2,1,2,1,2,2,1,2,1,1,1,1,0,0,1,1,0,2,1,1,1,2,2,2,2,1,2,1,2,2,1,1,2,1,2,0,0,2,1,1,2,0,2,1,1,1,0,1,1,2,1,2,1,2,0,2,2,2,1,0,1,1,2,2,2,1,2,2,1,2,2,1,2,1,1,2,1,2,2,2,0,1,1,2,2,1,2,0,1,1,2,1,2,1,2,2,0,2,1,2,1,2,0,0,1,1,1,1,1,1,0,1,0,1,1,2,2,0,2,1,1,1,1,2,2,1,1,2,2,0,1,1,2,1,2,0,0,0,1,1,0,1,1,2,2,2,2,0,0,0,2,0,1,1,1,0,1,1,2,1,2,1,2,2,2,1,0,2,1,1,1,2,1,2,1,2,1,2…	MAGIv3.1_44358	MAGIv3.1_44358	chr01	107460041	Consistent
644	gnp_QBM22b07b	mu	IDP254	chr01	158.4	1.2	-	-	Genoplante Map	1,0,0,0,1,0,1,2,0,2,0,1,0,1,1,2,2,0,0,1,1,2,2,1,0,1,2,2,1,2,1,1,1,1,0,0,1,0,0,0,0,0,1,2,0,0,2,1,0,1,2,0,0,1,0,1,2,0,0,0,0,1,2,0,0,0,0,0,1,1,0,1,0,0,0,0,0,0,0,0,0,0,0,0,0,0,0,0,0,0,0,0,0,0,0,0,0,0,0,0,0,0,0,0,0,0,0,0,0,0,0,0,0,0,0,0,0,0,0,0,0,0,0,0,0,0,0,0,0,0,0,0,0,0,0,0,0,0,0,0,0,0,0,0,0,0,0,0,0,0,0,0,0,0,0,0,0,0,0,0,0,0,0,0,0,0,0,0,0,0,0,0,0,0,0,0,0,0,0,0,0,0,0,0,0,0,0,0,0,0,0,0,0,0,0,0,0,0,0,0…	CF017277	CF017277	chr05	6666144	Inconsistent
645	IDP2412	mu	IDP254	chr01	158.4	1.5	Dominant	-/+	ISU Map7	1,2,2,1,1,2,1,2,0,2,2,1,1,1,1,2,2,0,0,1,1,2,2,1,1,1,2,2,1,2,1,1,1,1,0,0,1,1,0,2,1,1,1,2,2,2,2,1,2,1,1,2,1,1,2,1,2,0,0,2,1,1,2,0,2,1,1,1,0,1,1,2,1,2,1,2,0,2,1,1,1,0,1,1,2,2,2,1,2,2,1,2,2,1,2,1,1,2,1,2,2,2,0,1,1,1,2,1,2,0,2,1,2,2,2,1,2,2,0,2,1,2,1,1,0,0,1,1,1,1,1,1,0,1,0,1,1,2,2,0,2,1,1,1,2,2,2,1,1,2,2,0,1,1,2,1,2,0,0,0,2,1,0,2,1,2,2,2,1,0,0,0,2,0,1,1,1,0,1,1,2,1,2,1,2,2,2,2,0,1,1,1,1,2,2,2,1,2,1,2…	MEC_27076_P95-Mar06	-	-	-	-
646	MAGI_25364	mu	IDP254	chr01	158.4	0.6	-	SNP	ISU SNP Map	1,2,0,1,1,2,1,2,0,1,2,1,1,1,1,2,2,0,0,1,1,2,2,1,2,1,2,2,1,2,1,1,1,1,0,0,1,1,0,0,1,1,1,2,2,2,2,1,2,1,2,2,1,1,2,1,2,0,0,2,1,1,2,0,2,1,1,0,0,1,1,0,1,2,1,2,0,2,2,2,1,0,1,1,2,2,2,1,2,2,1,2,2,1,2,1,1,2,1,2,2,2,0,2,1,2,2,1,2,0,2,1,2,2,2,1,2,2,0,2,1,2,1,2,0,0,1,1,1,1,1,1,0,1,0,1,1,2,2,0,2,1,1,1,0,2,2,1,1,2,2,0,1,1,2,1,2,0,0,0,1,1,0,1,1,2,2,2,1,0,0,0,2,0,1,1,1,0,1,1,2,1,2,1,2,2,2,1,0,1,1,1,1,2,1,2,1,2,1,2…	MAGIv3.1_25364	MAGIv3.1_25364	chr01	106151156	Consistent
647	MAGI_36418	mu	IDP254	chr01	158.4	0.3	-	SNP	ISU SNP Map	1,2,0,1,1,2,1,2,0,2,2,1,1,1,1,2,2,0,0,1,1,2,2,1,1,1,2,2,1,2,1,1,1,1,0,0,1,1,0,0,1,1,1,2,2,2,2,1,2,1,2,2,1,1,2,1,2,0,0,2,0,1,2,0,2,1,1,0,0,1,1,1,1,2,1,2,0,2,2,2,1,0,1,1,2,2,2,1,2,2,1,2,2,1,2,1,1,2,1,2,2,2,0,1,1,2,2,1,2,0,2,1,2,1,2,1,2,2,0,2,1,2,1,2,0,0,1,1,1,1,1,1,0,1,0,1,1,2,2,0,2,1,1,1,0,2,2,1,1,2,2,0,1,1,2,1,2,0,0,0,0,1,0,1,1,2,2,2,1,0,0,0,2,0,1,1,1,0,1,1,2,1,2,1,2,2,2,1,0,1,1,1,1,2,1,2,1,2,1,2…	MAGIv3.1_36418	MAGIv3.1_36418	chr01	111633554	Consistent
648	MAGI_64501	mu	IDP254	chr01	158.4	0.6	-	SNP	ISU SNP Map	1,2,0,1,1,2,1,2,0,2,0,1,1,1,1,2,2,0,0,1,1,2,2,1,1,1,2,2,1,2,1,1,1,1,0,0,1,1,0,0,1,1,1,2,2,2,2,1,2,1,2,2,1,1,2,1,2,0,0,2,1,1,2,0,2,1,0,0,0,1,1,0,1,1,1,2,0,2,2,2,1,0,1,1,2,2,2,1,0,2,1,2,2,0,2,1,1,2,1,2,2,2,0,1,1,2,0,1,2,0,2,1,2,2,2,1,2,2,0,2,0,2,1,2,0,0,1,1,1,1,1,1,0,1,0,1,1,2,2,0,2,1,1,1,0,2,2,1,1,0,2,0,1,1,2,1,2,0,0,0,1,1,0,1,1,2,2,2,1,0,0,0,2,0,1,1,1,0,1,1,2,1,2,0,2,2,2,1,0,1,1,1,1,2,1,2,1,2,1,2…	MAGIv3.1_64501	MAGIv3.1_64501	chr01	114236246	Consistent
649	IDP7178	mu	IDP254	chr01	158.4	0.7	Co-Dominant	Size	ISU Map7	1,2,0,1,1,2,1,2,0,2,2,1,1,1,1,2,2,0,0,1,1,2,2,1,1,1,2,2,1,2,1,1,1,1,0,0,1,1,0,2,1,1,1,2,2,2,2,1,2,1,2,2,1,1,2,1,2,0,0,2,1,1,2,0,2,1,1,1,0,1,1,2,1,1,1,2,0,2,2,2,1,0,1,1,2,2,2,1,2,2,1,2,2,1,2,1,1,2,1,2,2,2,0,1,1,2,2,1,2,0,2,1,2,2,2,1,2,2,0,2,1,2,1,2,0,0,1,1,1,1,1,1,0,1,0,1,1,2,2,0,2,1,1,1,2,2,2,1,1,2,2,0,1,1,2,1,2,0,0,0,1,1,0,1,1,2,2,2,1,0,0,0,2,0,1,1,1,0,1,1,2,1,2,1,2,2,2,1,0,1,1,1,1,2,1,2,1,2,1,2…	MAGIv3.1_17084	MAGIv3.1_17084	chr01	114010897	Consistent
650	IDP7590	mu	IDP254	chr01	158.4	1	Co-Dominant	Size	ISU Map7	1,2,0,1,1,2,1,2,0,2,2,1,1,1,1,2,2,0,0,1,1,2,2,1,1,1,2,2,1,2,1,1,1,1,0,0,1,1,0,2,1,1,1,2,2,2,2,1,2,1,2,2,1,1,2,1,2,0,0,2,1,1,2,0,2,1,1,1,0,1,1,2,1,1,1,2,0,2,2,2,1,0,1,1,2,2,2,1,2,2,1,2,2,1,2,1,1,2,1,2,2,2,0,1,1,2,2,1,2,0,2,1,2,2,2,1,2,2,0,2,1,2,1,2,0,0,1,1,1,1,1,1,0,1,0,1,1,2,2,0,2,1,1,1,1,2,2,1,1,2,2,0,1,1,0,1,2,0,0,0,1,1,0,1,1,2,2,2,1,0,0,0,2,0,1,1,1,0,1,1,2,1,2,1,2,2,2,1,0,1,1,1,1,2,2,2,1,2,1,2…	MAGIv3.1_29280	MAGIv3.1_29280	chr01	139992709	Consistent
651	IDP8132	mu	IDP254	chr01	158.4	0.9	Dominant	+/-	ISU Map7	1,2,2,1,1,2,1,2,0,2,2,1,1,1,1,2,2,0,0,1,1,2,2,1,1,1,2,2,1,2,1,1,2,1,0,0,1,1,0,2,1,1,1,2,2,2,2,1,2,1,2,2,1,1,2,1,2,0,0,2,1,1,2,0,2,1,1,1,0,1,1,2,1,1,1,2,0,2,2,2,1,0,1,1,2,2,2,1,2,2,1,2,2,1,2,1,1,2,1,2,2,2,0,1,1,2,2,1,2,0,1,1,2,2,2,1,2,2,0,2,1,2,1,2,0,0,1,1,1,1,1,1,0,1,0,1,1,2,2,0,2,1,1,1,1,2,2,1,1,2,2,0,1,1,2,1,2,0,0,0,1,1,0,1,1,2,2,2,1,0,0,0,2,0,1,1,1,0,1,1,2,1,1,1,2,2,2,1,0,1,1,1,1,2,1,2,1,2,1,2…	MAGIv4.0_18776	MAGIv4.0_18776	chr07	3411369	Inconsistent
652	IDP8049	mu	IDP254	chr01	158.4	0.9	Dominant	+/-	ISU Map7	1,2,2,1,1,2,1,2,0,2,2,1,1,1,1,2,2,0,0,1,1,2,2,1,1,1,2,2,1,2,1,1,1,1,0,0,1,1,0,2,1,1,1,2,2,2,2,1,2,1,2,2,1,1,2,1,2,0,0,2,1,1,2,0,2,1,1,1,0,1,1,2,1,1,1,2,0,2,2,2,1,0,1,1,2,2,2,1,2,2,1,2,2,1,2,1,1,2,1,2,2,2,0,1,1,2,2,1,2,0,1,1,2,1,2,1,2,2,0,2,1,2,1,2,0,0,1,1,1,1,1,1,0,1,0,1,1,2,2,0,2,1,1,1,1,1,2,1,1,2,2,0,1,1,2,1,2,0,2,2,1,2,0,1,1,2,2,2,1,0,0,0,2,0,1,1,1,0,1,1,2,1,1,1,2,2,2,1,0,1,1,1,1,2,1,2,1,2,1,2…	MAGIv4.0_39268	MAGIv4.0_39268	chr01	142809216	Consistent
653	IDP4246	mu	IDP254	chr01	158.4	1.3	Dominant	+/-	ISU Map7	1,2,2,1,1,2,1,2,0,2,2,1,1,1,1,2,2,0,0,1,1,2,2,1,1,1,2,2,1,2,1,1,1,1,0,0,1,1,0,2,1,1,1,2,2,2,2,1,2,1,2,2,1,1,2,1,2,0,0,2,1,1,2,0,2,1,1,1,0,1,1,2,1,1,1,2,0,2,2,2,1,0,1,1,2,2,2,1,2,2,1,2,2,1,2,1,1,2,1,2,2,2,0,1,1,2,2,1,2,0,1,1,2,1,2,1,2,1,0,2,1,2,1,2,0,0,1,1,1,1,1,1,0,1,0,1,1,2,2,0,2,1,1,1,2,1,2,1,1,2,2,0,1,1,2,1,2,0,2,2,1,1,0,1,1,2,2,2,1,0,0,0,2,0,1,1,1,0,1,1,2,1,1,1,2,2,2,1,0,1,1,1,1,2,1,2,1,2,1,2…	MAGIv3.1_88251	MAGIv3.1_88251	chr01	143723817	Consistent
654	IDP676	mu	IDP254	chr01	158.4	1.5	Co-Dominant	Size	ISU Map7	1,2,2,1,1,2,1,2,0,2,2,1,1,1,1,1,2,0,0,1,1,2,2,0,1,1,2,2,1,2,1,1,1,1,0,0,1,1,0,2,1,1,1,2,2,2,2,1,2,1,2,2,1,1,2,1,2,0,0,2,1,1,2,0,2,1,1,1,0,0,1,2,1,1,1,2,0,2,2,2,1,0,1,1,2,2,2,1,2,2,1,2,2,1,2,1,1,2,1,2,2,2,0,1,1,0,2,1,2,0,1,1,2,2,2,1,2,2,0,2,1,2,1,2,0,0,1,1,1,1,1,1,0,1,0,1,1,2,2,0,2,1,1,1,1,1,0,2,1,2,2,0,1,1,2,1,2,0,0,0,1,1,0,1,1,2,2,2,1,0,0,0,2,0,1,1,1,0,1,1,2,1,2,1,2,2,2,1,0,1,1,0,1,2,1,2,1,2,1,2…	MAGIv3.1_97084	-	-	-	-
655	IDP1675	mu	IDP254	chr01	158.4	0.7	Dominant	-/+	ISU Map7	1,2,2,1,1,2,1,2,0,2,2,1,1,1,1,1,2,0,0,1,1,2,2,1,1,1,2,2,1,2,1,1,1,1,0,0,1,1,0,2,1,1,1,2,2,2,2,1,2,1,2,2,1,1,2,1,2,0,0,2,1,1,2,0,2,1,1,1,0,1,1,2,1,1,1,2,0,2,2,2,1,0,1,1,2,2,2,1,1,2,1,2,1,1,1,1,1,2,1,2,2,2,0,1,2,2,2,1,2,0,1,1,2,1,2,1,2,2,0,2,1,2,1,2,0,0,1,1,1,1,1,1,0,1,0,1,1,2,2,0,2,1,1,1,2,1,2,2,1,2,2,0,1,1,2,1,2,0,0,0,1,1,0,1,1,2,2,2,1,0,0,0,2,0,1,1,1,0,1,1,2,1,2,1,2,2,1,1,0,1,1,1,1,2,1,2,1,2,1,2…	MEC_54433_P95-Mar06	MEC_54433_P95-Mar06	chr01	149620374	Consistent
656	IDP4431	mu	IDP254	chr01	158.4	0.5	Co-Dominant	Size	ISU Map7	1,2,0,1,1,2,1,2,0,2,2,1,1,1,1,1,2,0,0,1,1,2,2,1,1,1,2,2,1,2,1,1,1,1,0,0,1,1,0,2,1,1,1,2,2,2,2,1,2,1,2,2,1,1,2,1,2,0,0,2,1,1,2,0,2,1,1,1,0,1,1,2,1,1,1,2,0,2,2,2,1,0,1,1,2,2,2,1,2,2,1,2,2,1,2,1,1,2,1,2,2,2,0,1,1,2,2,1,2,0,1,1,2,1,2,1,2,2,0,2,1,2,1,2,0,0,1,1,1,1,1,1,0,1,0,1,1,2,2,0,2,1,1,1,1,1,2,2,1,2,0,0,1,1,2,1,2,0,0,0,1,1,0,1,1,2,2,2,1,0,0,0,2,0,1,1,1,0,1,1,2,1,0,1,2,2,1,1,0,1,1,1,1,2,1,2,1,2,1,2…	MAGIv3.1_61320	MAGIv3.1_61320	chr01	148297403	Consistent
657	MAGI_31220	mu	IDP254	chr01	158.4	0	-	SNP	ISU SNP Map	1,2,0,1,1,2,1,2,0,2,2,1,1,1,1,0,2,0,0,1,1,2,2,1,1,1,2,2,1,2,1,1,1,1,0,0,1,1,0,0,1,1,1,2,2,2,2,1,2,1,2,2,1,1,2,1,2,0,0,2,1,1,2,0,2,1,1,0,0,1,1,0,1,1,1,2,0,2,2,2,1,0,1,1,2,2,2,1,2,2,1,2,2,1,2,1,1,2,1,2,2,2,0,1,1,2,2,1,2,0,1,1,2,1,2,1,2,2,0,2,1,2,1,2,0,0,1,1,1,1,1,1,0,1,0,1,1,2,2,0,2,1,1,1,0,1,2,2,1,2,2,0,1,1,2,1,2,0,0,0,1,1,0,1,1,2,2,2,1,0,0,0,2,0,1,1,1,0,1,1,2,1,2,1,2,2,1,1,0,1,1,1,1,2,1,2,1,2,1,2…	MAGIv3.1_31220	MAGIv3.1_31220	chr01	149620316	Consistent
658	IDP7344	mu	IDP254	chr01	158.4	2.1	Co-Dominant	Size	ISU Map7	1,2,0,1,1,2,1,2,0,2,2,1,1,1,1,1,2,0,0,1,1,2,2,1,1,1,2,2,1,2,1,1,1,1,0,0,1,1,0,2,1,1,1,2,2,2,2,1,2,1,2,2,1,1,2,1,2,0,0,2,1,1,2,0,2,1,1,1,0,1,1,1,1,1,1,2,0,2,2,2,1,0,1,1,2,2,2,1,2,2,1,2,2,1,2,1,1,2,1,2,2,2,0,1,1,2,2,1,2,0,0,1,2,1,2,1,2,2,0,2,1,2,1,2,0,0,1,1,1,1,1,1,0,1,0,1,1,2,2,0,2,1,1,1,1,1,2,1,1,2,2,0,1,1,0,1,2,0,0,0,1,1,0,1,1,2,2,2,1,0,0,0,2,0,1,1,1,0,1,1,2,1,2,1,2,2,1,1,0,1,1,1,1,2,1,1,1,2,1,2…	MAGIv3.1_63609	MAGIv3.1_63609	chr01	150292304	Consistent
659	IDP5854	mu	IDP254	chr01	158.4	1.9	Dominant	+/-	ISU Map7	1,2,1,1,1,2,1,2,0,2,2,1,1,1,1,1,1,0,0,2,1,1,2,2,1,1,2,2,1,2,1,1,1,1,0,0,1,1,0,2,1,1,1,2,2,2,1,2,1,2,2,2,1,1,2,1,2,0,0,2,1,1,2,0,2,1,1,1,0,1,1,1,1,1,1,2,0,2,1,2,1,0,1,1,2,2,2,1,2,2,1,2,2,1,2,1,1,2,1,1,1,2,0,1,1,2,2,1,2,0,1,1,2,2,2,1,2,2,0,2,1,2,1,2,0,0,1,1,1,1,1,1,0,1,0,1,1,2,2,0,2,1,2,1,1,1,2,1,1,2,2,0,1,1,2,1,2,0,2,2,1,1,0,1,1,2,2,1,1,0,0,0,2,0,1,2,1,0,1,1,2,1,2,1,2,2,1,1,0,1,1,1,1,2,1,2,1,2,1,2…	MAGIv3.1_71759	MAGIv3.1_71759	chr01	151136556	Consistent
660	IDP4549	mu	IDP254	chr01	158.4	0.6	Dominant	+/-	ISU Map7	1,2,2,1,1,2,1,2,0,2,2,1,1,1,1,1,2,0,0,1,1,2,2,1,1,1,2,2,1,2,1,1,1,1,0,0,1,1,0,2,1,1,1,2,2,2,2,1,2,1,2,2,1,1,2,1,2,0,0,2,1,1,2,0,2,1,1,1,0,1,1,1,1,1,1,2,0,2,1,2,1,0,1,1,2,2,2,1,2,2,1,2,2,1,2,1,1,2,1,1,1,2,0,1,1,2,2,1,2,0,1,1,2,2,2,1,2,2,0,2,1,2,1,2,0,0,1,1,1,1,2,1,0,1,0,1,1,2,2,0,2,1,1,1,1,1,2,1,1,2,2,0,1,1,2,1,2,0,0,0,1,1,0,1,1,2,2,1,1,0,0,0,2,0,1,1,1,0,1,1,2,1,2,1,2,2,1,1,0,1,1,1,1,2,1,2,1,2,1,2…	MAGIv3.1_48790	MAGIv3.1_48790	chr01	153111030	Consistent
661	IDP7403	mu	IDP254	chr01	158.4	1	Dominant	+/-	ISU Map7	1,2,2,1,1,2,1,2,0,2,2,1,1,1,1,1,2,0,0,1,1,2,2,1,1,1,2,2,1,2,1,1,1,1,0,0,1,1,0,2,1,1,1,2,2,2,2,1,2,1,2,2,1,1,2,1,2,0,0,2,1,1,2,0,2,1,1,1,0,1,1,1,1,1,1,2,0,2,1,2,1,0,1,1,2,2,2,1,2,2,1,2,2,1,2,1,1,2,1,1,1,2,0,1,1,2,2,1,2,0,1,1,2,2,2,1,2,2,0,2,1,2,1,2,0,0,1,1,1,1,1,1,0,1,0,1,1,2,2,0,2,1,1,1,1,1,2,2,1,2,2,0,1,1,2,1,2,0,2,2,1,1,0,1,1,2,2,1,1,0,0,0,2,0,1,1,1,0,1,1,2,1,2,1,2,2,1,1,0,1,1,1,2,2,1,2,1,2,1,2…	MAGIv3.1_107088	MAGIv3.1_107088	chr01	154996305	Consistent
662	IDP4936	mu	IDP254	chr01	158.4	1.7	Co-Dominant	Size	ISU Map7	1,2,0,1,1,2,1,2,0,2,2,1,1,1,1,1,2,0,0,1,1,2,2,1,1,1,2,2,1,2,1,1,1,1,0,0,1,1,0,2,1,1,1,2,2,2,2,1,2,1,2,2,1,1,2,1,2,0,0,2,1,1,2,0,2,1,1,1,0,0,1,1,1,1,1,2,0,2,1,2,1,0,1,1,2,2,2,1,2,2,2,2,2,1,2,1,1,2,1,1,1,2,0,1,1,2,2,1,2,0,1,1,2,1,2,1,2,2,0,2,1,2,1,2,0,0,1,1,1,1,1,1,0,1,0,1,1,2,2,0,2,1,1,1,0,1,2,2,1,2,2,0,1,1,2,1,2,0,0,0,1,1,0,1,1,2,2,1,2,0,0,0,2,0,1,1,1,0,1,1,2,1,2,1,2,2,2,1,0,1,1,0,0,2,0,2,1,2,2,2…	MAGIv3.1_49460	MAGIv3.1_49460	chr01	158970480	Consistent
663	IDP7632	mu	IDP254	chr01	158.4	1.9	Dominant	+/-	ISU Map7	1,2,2,1,1,2,1,2,0,2,2,2,1,1,1,1,2,0,0,1,1,2,2,1,1,1,2,2,1,2,1,1,1,1,0,0,1,1,0,2,1,1,1,2,2,2,2,1,2,1,2,2,1,1,2,1,2,0,0,2,1,1,2,0,2,1,1,1,0,1,1,1,1,1,1,2,0,2,1,2,1,0,1,1,2,2,2,1,2,2,1,2,2,1,2,1,1,2,1,1,1,2,0,1,1,2,2,1,2,0,2,2,2,2,2,2,2,2,0,2,1,2,1,2,0,0,1,1,1,2,1,1,0,1,0,1,1,2,2,0,2,1,1,1,1,1,2,2,1,2,2,0,1,1,2,1,2,0,0,0,2,1,0,2,1,2,2,1,1,0,0,0,2,0,1,1,1,0,1,1,2,1,2,1,2,2,1,1,0,1,1,1,1,2,1,2,1,2,1,2…	MAGIv3.1_75865	MAGIv3.1_75865	chr01	156090919	Consistent
664	IDP4529	mu	IDP254	chr01	158.4	1	Co-Dominant	Size	ISU Map7	1,2,0,1,1,2,1,2,0,2,2,1,1,1,1,1,2,0,0,1,1,2,2,1,1,1,2,2,1,2,1,1,1,1,0,0,1,1,0,2,1,1,1,2,2,2,2,1,2,1,2,2,1,1,2,1,2,0,0,2,1,1,2,0,2,1,1,1,0,1,1,1,1,1,1,2,0,2,1,2,1,0,1,1,2,2,2,1,2,2,1,2,2,1,2,1,1,2,1,1,1,2,0,0,1,0,2,1,2,0,2,1,2,1,2,1,2,2,0,2,1,2,1,2,0,0,1,1,1,1,1,1,0,1,0,1,1,2,2,0,2,1,1,1,0,1,2,2,1,2,2,0,1,1,2,1,2,0,0,0,2,1,0,2,1,2,2,1,1,0,0,0,2,0,1,1,1,0,1,1,2,1,2,1,2,2,1,1,0,1,1,1,1,2,1,2,1,2,1,2…	MAGIv3.1_27750	MAGIv3.1_27750	chr01	155497654	Consistent
665	IDP4445	mu	IDP254	chr01	158.4	0.6	Co-Dominant	Size	ISU Map7	1,2,0,1,1,2,1,2,0,2,2,1,1,1,1,1,2,0,0,1,1,2,2,1,1,1,2,2,1,2,1,1,1,1,0,0,1,1,0,2,1,1,1,2,2,2,2,1,2,1,2,2,1,1,2,1,2,0,0,2,1,1,2,0,2,1,1,1,0,1,1,1,1,1,1,2,0,2,1,2,1,0,1,1,2,2,2,1,2,2,1,2,2,1,2,1,1,2,1,1,1,2,0,1,1,2,2,1,2,0,2,1,2,1,2,1,2,2,0,2,1,2,1,2,0,0,1,1,1,1,1,1,0,1,0,1,1,2,2,0,2,1,1,1,1,1,1,2,1,2,2,0,1,1,2,1,2,0,0,0,2,1,0,2,1,2,2,1,1,0,0,0,2,0,1,1,1,0,1,1,2,1,2,1,2,2,1,1,0,1,1,1,1,2,1,2,1,2,1,2…	MAGIv3.1_25070	MAGIv3.1_25070	chr01	154561207	Consistent
666	MAGI_107088	mu	IDP254	chr01	158.4	0.2	-	SNP	ISU SNP Map	1,2,0,1,1,2,1,2,0,2,2,1,1,1,1,0,2,0,0,1,1,2,2,1,1,1,2,2,1,2,1,1,1,1,0,0,1,1,0,0,1,1,1,2,2,2,2,1,2,1,2,2,1,1,2,1,2,0,0,2,1,1,2,0,2,1,1,0,0,1,1,1,1,1,1,2,0,2,1,2,1,0,1,1,2,2,2,1,2,2,1,2,2,1,2,1,1,2,1,1,1,2,0,1,1,2,2,1,0,0,1,1,2,2,2,1,2,2,0,2,1,2,1,2,0,0,1,1,1,1,1,1,0,1,0,1,1,2,2,0,2,1,1,1,0,1,2,2,1,2,2,0,1,1,2,1,2,0,0,0,0,1,0,1,1,2,2,1,1,0,0,0,2,0,1,1,1,0,1,1,2,1,2,1,2,2,1,1,0,1,1,1,1,2,1,2,1,2,1,2…	MAGIv3.1_107088	MAGIv3.1_107088	chr01	154996305	Consistent
667	MAGI_41298	mu	IDP254	chr01	158.4	0.2	-	SNP	ISU SNP Map	1,2,0,1,1,2,1,2,0,2,2,1,1,1,1,0,2,0,0,1,1,2,2,1,1,1,2,2,1,2,1,1,1,1,0,0,1,1,0,0,1,0,1,2,2,2,2,1,2,1,2,2,1,1,2,1,0,0,0,0,1,1,2,0,2,1,1,0,0,1,1,0,1,1,1,2,0,2,1,2,1,0,1,1,2,2,2,1,2,2,1,2,2,1,2,1,1,2,1,1,1,2,0,1,1,2,2,1,2,0,1,1,2,2,2,1,2,2,0,2,1,2,1,2,0,0,1,0,1,1,1,1,0,1,0,1,0,2,2,0,2,1,1,1,0,1,2,2,1,2,2,0,1,1,2,1,2,0,0,0,1,0,0,1,1,2,2,1,1,0,0,0,2,0,1,1,1,0,1,1,2,1,2,1,2,2,1,1,0,1,1,1,1,2,1,2,1,2,1,2…	MAGIv3.1_41298	MAGIv3.1_41298	chr01	151328204	Consistent
668	MAGI_94194	mu	IDP254	chr01	158.4	0.7	-	SNP	ISU SNP Map	1,2,0,1,1,2,1,2,0,2,2,1,1,1,1,0,2,0,0,1,1,2,2,1,1,1,2,2,1,2,1,1,1,1,0,0,1,1,0,0,1,1,1,2,2,2,2,1,2,1,2,2,1,1,2,1,2,0,0,2,1,1,2,0,2,1,1,0,0,1,1,0,1,1,1,2,0,2,1,2,1,0,1,1,2,2,2,1,2,2,1,2,2,1,2,1,1,2,1,1,1,2,0,1,1,2,2,1,2,0,1,1,2,2,2,1,2,2,0,2,1,2,1,2,0,0,1,1,1,1,1,1,0,1,0,1,1,2,2,0,2,1,1,1,0,1,2,1,1,2,2,0,1,1,2,1,2,0,0,0,1,1,0,1,1,2,2,1,1,0,0,0,2,0,1,1,1,0,1,1,2,1,2,1,2,2,1,1,0,1,1,1,1,2,1,2,1,2,1,2…	MAGIv3.1_94194	MAGIv3.1_94194	chr01	151804864	Consistent
669	IDP8606	mu	IDP254	chr01	158.4	0.8	Dominant	+/-	ISU Map7	1,2,2,1,1,2,1,2,0,2,2,1,1,1,1,1,2,0,0,1,1,2,2,1,1,1,2,2,1,2,1,1,1,1,0,0,1,1,0,2,1,1,1,2,2,2,2,1,2,1,2,2,1,1,2,1,2,0,0,2,1,1,2,0,2,1,1,1,0,1,1,1,1,1,1,2,0,2,1,2,1,0,1,1,2,2,2,1,2,2,1,2,2,1,2,1,1,2,1,1,1,2,0,1,1,2,2,1,2,0,1,1,2,1,2,1,2,2,0,2,1,2,1,2,0,0,1,1,1,1,1,1,0,1,0,1,1,2,2,0,2,1,1,1,1,1,2,1,1,2,2,0,1,1,2,1,2,0,2,2,1,1,0,1,1,2,2,1,1,0,0,0,2,0,1,1,1,0,1,1,2,1,1,1,2,2,1,1,0,1,1,1,1,2,1,2,1,2,1,2…	MAGIv3.1_54996	MAGIv3.1_54996	chr01	154086585	Consistent
670	IDP7310	mu	IDP254	chr01	158.4	1.2	Dominant	+/-	ISU Map7	1,2,2,1,1,2,1,2,0,2,2,1,1,1,1,1,2,0,0,1,1,2,2,1,1,1,2,2,1,2,1,1,1,1,0,0,1,1,0,2,1,1,1,2,2,2,2,1,2,1,2,2,1,1,2,1,2,0,0,2,1,1,2,0,2,1,1,1,0,1,1,1,1,1,1,2,0,2,1,2,1,0,1,1,2,2,2,1,2,2,1,2,2,1,2,1,1,2,1,1,1,2,0,2,2,2,2,1,2,0,1,1,2,2,2,1,2,2,0,2,1,2,1,2,0,0,1,1,1,1,1,1,0,1,0,1,1,2,2,0,2,1,1,1,1,1,2,1,1,2,2,0,1,1,2,1,2,0,2,2,1,1,0,1,1,2,2,1,1,0,0,0,2,0,1,1,1,0,1,1,2,1,1,1,2,2,1,1,0,1,1,1,1,2,1,2,1,2,1,2…	MAGIv3.1_99767	MAGIv3.1_99767	chr01	151743213	Consistent
671	umc102a	mu	IDP254	chr01	158.4	0.4	-	-	Genoplante Map	2,0,0,0,1,0,1,2,0,2,0,1,0,1,1,1,2,0,0,1,1,2,2,1,0,1,2,2,1,2,1,1,1,1,0,0,1,0,0,0,0,0,1,2,0,0,2,1,0,1,2,0,0,1,0,1,2,0,0,0,0,0,2,0,0,0,0,0,1,1,0,1,0,0,0,0,0,0,0,0,0,0,0,0,0,0,0,0,0,0,0,0,0,0,0,0,0,0,0,0,0,0,0,0,0,0,0,0,0,0,0,0,0,0,0,0,0,0,0,0,0,0,0,0,0,0,0,0,0,0,0,0,0,0,0,0,0,0,0,0,0,0,0,0,0,0,0,0,0,0,0,0,0,0,0,0,0,0,0,0,0,0,0,0,0,0,0,0,0,0,0,0,0,0,0,0,0,0,0,0,0,0,0,0,0,0,0,0,0,0,0,0,0,0,0,0,0,0,0,0…	G10801,CC744853,G10802,DQ005498,CC829467	-	-	-	-
672	umc1124	mu	IDP254	chr01	158.4	2.1	-	-	Genoplante Map	2,0,0,0,1,0,1,2,0,2,0,1,0,1,1,1,2,0,0,1,1,2,2,1,0,1,2,2,1,2,1,1,1,1,0,0,1,1,0,0,1,0,1,2,0,2,2,1,0,1,2,0,1,1,0,1,2,0,1,0,0,1,2,0,0,0,0,0,1,1,2,1,0,1,0,0,0,0,0,0,0,0,0,0,0,0,0,0,0,0,0,0,0,0,0,0,0,0,0,0,0,0,0,0,0,0,0,0,0,0,0,0,0,0,0,0,0,0,0,0,0,0,0,0,0,0,0,0,0,0,0,0,0,0,0,0,0,0,0,0,0,0,0,0,0,0,0,0,0,0,0,0,0,0,0,0,0,0,0,0,0,0,0,0,0,0,0,0,0,0,0,0,0,0,0,0,0,0,0,0,0,0,0,0,0,0,0,0,0,0,0,0,0,0,0,0,0,0,0,0…	-	-	-	-	-
673	fumc1703	mu	IDP254	chr01	158.4	0	-	-	Genoplante Map	0,0,0,0,1,0,1,2,0,2,0,1,0,1,1,1,2,0,0,1,1,2,2,1,0,1,2,2,1,2,1,1,1,1,0,0,1,1,0,0,1,0,1,2,0,2,2,1,0,1,2,0,1,1,0,1,2,0,1,0,0,1,2,0,0,0,0,0,1,1,2,1,0,1,0,0,0,0,0,0,0,0,0,0,0,0,0,0,0,0,0,0,0,0,0,0,0,0,0,0,0,0,0,0,0,0,0,0,0,0,0,0,0,0,0,0,0,0,0,0,0,0,0,0,0,0,0,0,0,0,0,0,0,0,0,0,0,0,0,0,0,0,0,0,0,0,0,0,0,0,0,0,0,0,0,0,0,0,0,0,0,0,0,0,0,0,0,0,0,0,0,0,0,0,0,0,0,0,0,0,0,0,0,0,0,0,0,0,0,0,0,0,0,0,0,0,0,0,0,0…	-	-	-	-	-
674	IDP4814	mu	IDP254	chr01	158.4	3.7	Dominant	+/-	ISU Map7	1,2,2,1,1,2,1,2,0,2,2,1,1,1,1,1,2,0,0,1,1,2,2,1,1,1,2,2,1,2,1,1,1,1,0,0,1,1,0,2,1,1,1,2,2,2,2,1,2,1,2,2,1,1,2,1,2,0,0,2,1,1,2,0,2,1,1,1,0,1,1,2,1,1,1,2,0,2,1,2,1,0,1,1,2,2,2,1,2,2,1,2,2,1,2,1,1,2,2,2,2,2,0,2,1,2,2,1,2,0,1,1,2,2,2,1,2,1,0,2,1,2,1,2,0,0,1,1,1,1,1,1,0,1,0,1,1,2,2,0,2,1,1,1,1,1,2,1,1,2,2,0,1,2,2,1,2,0,0,0,1,1,0,1,1,2,2,2,1,0,0,0,2,0,1,1,1,0,1,1,2,1,1,1,2,2,2,1,0,1,1,2,2,2,2,2,2,2,2,2…	MAGIv3.1_26104	MAGIv3.1_26104	chr01	148302873	Consistent
675	IDP4293	mu	IDP254	chr01	158.4	3.6	Dominant	+/-	ISU Map7	2,2,2,1,1,2,1,2,0,2,2,1,1,1,1,2,2,0,0,1,1,2,2,1,2,1,2,2,1,2,1,1,1,1,0,0,1,1,0,2,1,1,1,2,2,2,2,1,2,1,2,2,1,1,2,1,2,0,0,2,1,1,2,0,2,1,2,1,0,1,1,2,1,2,1,2,0,2,2,2,1,0,1,1,2,2,2,1,2,2,1,2,2,1,2,1,1,2,1,2,2,2,0,1,1,2,2,1,2,0,2,1,2,2,2,1,2,1,0,2,2,2,1,2,0,0,1,1,1,1,1,1,0,1,0,1,1,2,2,0,2,1,1,1,1,2,2,1,1,2,2,0,1,1,2,1,2,0,2,2,1,1,0,1,1,2,2,2,1,0,0,0,2,0,1,2,1,0,1,1,2,1,1,1,2,2,2,1,0,1,1,1,2,2,2,2,1,2,2,2…	MAGIv3.1_29277	MAGIv3.1_29277	chr01	110741330	Consistent
676	IDP537	mu	IDP254	chr01	158.4	2.3	Dominant	+/-	ISU Map7	1,2,2,2,2,2,1,2,0,2,2,2,2,2,1,2,2,0,0,1,1,2,2,2,2,1,2,2,1,2,1,1,1,1,0,0,1,1,0,2,1,1,1,2,2,2,2,1,2,1,2,2,1,1,2,1,2,0,0,2,1,1,2,0,2,1,1,1,0,2,1,2,1,2,1,2,0,2,2,1,1,0,1,1,2,2,2,1,2,2,1,2,2,1,2,1,1,2,1,2,2,2,0,1,1,2,2,1,2,0,2,2,2,2,2,1,2,2,0,2,1,2,1,2,0,0,1,2,1,1,1,1,0,1,0,1,1,2,2,0,2,1,1,1,1,2,2,1,1,2,2,0,1,1,2,1,2,0,0,0,1,1,0,1,1,2,2,2,1,0,0,0,2,0,1,1,1,0,1,1,2,1,2,1,2,2,2,1,0,1,1,1,1,2,2,2,1,2,1,2…	MEC_42560_P95-Mar06	MEC_42560_P95-Mar06	chr01	111168471	Consistent
677	IDP6631	mu	IDP254	chr01	158.4	1.6	Dominant	+/-	ISU Map7	1,2,2,1,2,2,1,2,0,2,2,2,1,1,1,2,2,0,0,1,1,2,2,1,2,1,2,2,1,2,1,1,1,1,0,0,1,1,0,2,1,1,1,2,2,2,2,1,2,1,2,2,1,1,2,1,2,0,0,2,1,1,2,0,2,1,1,1,0,1,1,2,1,2,1,2,0,2,2,2,1,0,1,1,2,2,2,1,2,2,1,2,2,1,2,1,1,2,1,2,2,2,0,1,1,2,2,1,2,0,2,1,2,2,2,1,2,2,0,2,1,2,1,2,0,0,1,1,1,1,1,1,0,1,0,1,1,2,2,0,2,1,1,1,1,2,2,1,1,2,2,0,1,1,2,1,2,0,0,0,1,1,0,1,1,2,2,2,1,0,0,0,2,0,1,1,1,0,1,1,2,1,1,1,2,2,2,1,0,1,2,1,1,2,1,2,1,2,1,2…	MAGIv3.1_88213	MAGIv3.1_88213	chr01	109471573	Consistent
678	IDP6962	mu	IDP254	chr01	158.4	1.4	Dominant	+/-	ISU Map7	1,2,2,1,1,2,1,2,0,1,2,1,1,1,1,2,2,0,0,1,1,2,2,1,2,1,2,2,1,2,1,1,1,1,0,0,1,1,0,2,1,1,1,2,2,2,2,1,2,1,2,2,2,1,2,1,2,0,0,2,1,1,1,0,2,1,1,1,0,1,1,2,1,2,1,2,0,2,2,2,1,0,1,1,2,2,2,1,2,2,2,2,2,1,2,1,1,2,1,2,2,2,0,2,1,2,2,1,2,0,2,1,2,1,2,1,2,2,0,2,1,2,1,2,0,0,1,1,1,1,1,1,0,1,0,1,1,2,2,0,2,1,1,1,1,2,2,1,1,2,2,0,1,1,2,1,2,0,2,2,1,1,0,1,1,2,2,2,1,0,0,0,2,0,1,1,1,0,1,1,2,1,1,1,2,1,2,1,0,1,2,1,1,2,1,2,1,2,1,2…	MAGIv3.1_84502	-	-	-	-
679	IDP2367	mu	IDP254	chr01	158.4	1.1	Co-Dominant	Size	ISU Map7	1,2,0,1,1,2,1,2,0,1,2,1,1,1,1,2,2,0,0,1,1,2,2,1,2,1,2,2,1,2,1,1,1,1,0,0,1,1,0,2,1,1,1,2,2,2,2,1,2,1,2,2,1,1,2,2,2,0,0,2,1,1,1,0,2,1,1,1,0,1,1,2,1,2,1,2,0,2,2,2,1,0,1,1,2,2,2,1,2,2,1,2,2,1,2,1,1,2,1,2,2,2,0,2,1,2,2,1,2,0,1,1,2,1,2,1,2,2,0,2,1,2,1,2,0,0,1,1,1,1,1,1,0,0,0,1,2,2,2,0,2,1,1,1,1,2,0,1,2,2,2,0,1,1,2,1,2,0,0,0,1,1,0,1,1,2,2,2,1,0,0,0,2,0,1,1,1,0,1,1,2,1,2,1,2,1,2,1,0,1,1,1,1,2,1,2,1,2,1,2…	MEC_32416_P95-Mar06	MEC_32416_P95-Mar06	chr01	103983127	Consistent
680	MAGI_81602	mu	IDP254	chr01	158.4	0.5	-	SNP	ISU SNP Map	1,2,0,1,1,2,1,2,0,1,2,1,1,1,1,2,2,0,0,1,1,2,2,1,2,1,2,2,1,2,1,1,1,1,0,0,1,1,0,0,1,1,1,2,2,2,2,1,2,1,2,2,1,1,2,1,2,0,0,2,1,1,1,0,2,1,1,0,0,1,1,0,1,2,1,2,0,2,2,2,2,0,1,1,2,2,2,1,2,2,1,2,2,1,2,1,1,2,1,2,2,2,0,2,1,2,2,1,2,0,1,1,2,1,2,1,2,2,0,2,1,2,1,2,0,0,1,1,1,1,1,1,0,1,0,1,1,2,2,0,2,1,1,1,0,2,2,1,1,2,2,0,1,1,2,1,2,0,0,0,1,1,0,1,1,2,2,2,1,0,0,0,2,0,1,1,1,0,1,1,2,1,2,1,2,1,2,1,0,2,1,1,1,2,1,2,1,2,1,2…	MAGIv3.1_81602	MAGIv3.1_81602	chr01	101787323	Consistent
681	gnp_QAF9h03b	mu	IDP254	chr01	158.4	1.3	-	-	Genoplante Map	1,0,0,0,1,0,1,2,0,1,0,1,0,1,0,2,2,0,0,1,1,2,2,0,0,1,2,2,1,2,1,1,1,1,0,0,1,0,0,0,0,0,1,2,0,0,2,1,0,0,2,0,0,0,0,1,2,0,0,0,0,1,1,0,0,0,0,0,1,1,0,1,0,0,0,0,0,0,0,0,0,0,0,0,0,0,0,0,0,0,0,0,0,0,0,0,0,0,0,0,0,0,0,0,0,0,0,0,0,0,0,0,0,0,0,0,0,0,0,0,0,0,0,0,0,0,0,0,0,0,0,0,0,0,0,0,0,0,0,0,0,0,0,0,0,0,0,0,0,0,0,0,0,0,0,0,0,0,0,0,0,0,0,0,0,0,0,0,0,0,0,0,0,0,0,0,0,0,0,0,0,0,0,0,0,0,0,0,0,0,0,0,0,0,0,0,0,0,0,0…	CX129471	-	-	-	-
682	gnp_AI857200	mu	IDP254	chr01	158.4	0	-	-	Genoplante Map	0,0,0,0,1,0,1,2,0,1,0,1,0,1,1,2,2,0,0,1,1,2,2,1,0,1,2,2,1,2,1,1,1,1,0,0,1,0,0,0,0,0,1,2,0,0,0,1,0,1,2,0,0,1,0,1,2,0,0,0,0,1,1,0,0,0,0,0,1,1,0,1,0,0,0,0,0,0,0,0,0,0,0,0,0,0,0,0,0,0,0,0,0,0,0,0,0,0,0,0,0,0,0,0,0,0,0,0,0,0,0,0,0,0,0,0,0,0,0,0,0,0,0,0,0,0,0,0,0,0,0,0,0,0,0,0,0,0,0,0,0,0,0,0,0,0,0,0,0,0,0,0,0,0,0,0,0,0,0,0,0,0,0,0,0,0,0,0,0,0,0,0,0,0,0,0,0,0,0,0,0,0,0,0,0,0,0,0,0,0,0,0,0,0,0,0,0,0,0,0…	AI857200	AI857200	chr01	103493484	Consistent
683	gnp_QBI19e09	mu	IDP254	chr01	158.4	3.3	-	-	Genoplante Map	1,0,0,0,1,0,1,2,0,1,0,1,0,1,1,2,2,0,0,1,1,2,2,1,0,1,2,2,1,2,1,1,1,1,0,0,1,0,0,0,0,0,1,2,0,0,2,1,0,2,2,0,0,1,0,1,2,0,0,0,0,1,1,0,0,0,0,0,1,2,0,1,0,0,0,0,0,0,0,0,0,0,0,0,0,0,0,0,0,0,0,0,0,0,0,0,0,0,0,0,0,0,0,0,0,0,0,0,0,0,0,0,0,0,0,0,0,0,0,0,0,0,0,0,0,0,0,0,0,0,0,0,0,0,0,0,0,0,0,0,0,0,0,0,0,0,0,0,0,0,0,0,0,0,0,0,0,0,0,0,0,0,0,0,0,0,0,0,0,0,0,0,0,0,0,0,0,0,0,0,0,0,0,0,0,0,0,0,0,0,0,0,0,0,0,0,0,0,0,0…	CX129502	-	-	-	-
684	umc1297	mu	IDP254	chr01	158.4	0	-	-	Genoplante Map	1,0,0,0,1,0,1,2,0,1,0,1,0,1,1,2,2,0,0,1,1,2,2,1,0,1,2,0,1,2,1,1,1,1,0,0,1,1,0,0,1,0,1,2,0,2,2,1,0,2,2,0,1,1,0,1,2,0,1,0,0,1,1,0,0,0,0,0,1,2,0,1,0,2,0,0,0,0,0,0,0,0,0,0,0,0,0,0,0,0,0,0,0,0,0,0,0,0,0,0,0,0,0,0,0,0,0,0,0,0,0,0,0,0,0,0,0,0,0,0,0,0,0,0,0,0,0,0,0,0,0,0,0,0,0,0,0,0,0,0,0,0,0,0,0,0,0,0,0,0,0,0,0,0,0,0,0,0,0,0,0,0,0,0,0,0,0,0,0,0,0,0,0,0,0,0,0,0,0,0,0,0,0,0,0,0,0,0,0,0,0,0,0,0,0,0,0,0,0,0…	AI947917,CC786652,AY112529,AC177896,CC786653,CC832924	CC786653	chr01	27328471	Inconsistent
685	IDP5918	mu	IDP254	chr01	158.4	0.5	Co-Dominant	Size	ISU Map7	1,2,0,1,1,2,1,2,0,2,2,1,1,1,1,2,2,0,0,1,1,2,2,1,1,1,2,2,1,2,1,1,1,1,0,0,1,1,0,2,1,1,1,2,2,2,2,1,2,1,0,1,2,2,1,2,1,0,0,1,2,2,1,0,1,2,2,2,0,2,2,1,2,2,2,1,0,1,1,1,2,0,2,2,1,1,1,2,1,1,2,1,1,2,1,2,2,1,2,1,1,1,0,2,2,1,2,1,2,0,1,1,2,0,2,1,2,2,0,2,1,2,1,2,0,0,1,1,1,1,1,1,0,1,0,1,1,2,2,0,2,1,1,1,2,2,2,1,1,2,2,0,1,1,2,1,2,0,0,0,1,1,0,1,1,2,2,2,1,0,0,0,2,0,1,1,1,0,1,1,2,1,2,1,2,2,2,1,0,1,1,1,1,2,1,2,1,2,1,2…	MAGIv3.1_83656	MAGIv3.1_83656	chr01	118404060	Consistent
686	IDP1407	sk	-	chr01	159	0	Co-Dominant	Size	ISU Map7	0,0,0,0,0,0,0,0,0,0,0,0,0,0,0,0,0,0,0,0,0,0,0,0,0,0,0,0,0,0,0,0,0,0,0,0,0,0,0,0,0,0,0,0,0,0,0,0,0,0,0,0,0,0,0,0,0,0,0,0,0,0,0,0,0,0,0,0,0,0,0,0,0,0,0,0,0,0,0,0,0,0,0,0,0,0,0,0,0,0,0,0,0,0,0,0,0,0,0,0,0,0,0,0,0,0,2,1,2,0,1,1,2,1,2,1,2,2,0,2,1,2,1,2,0,0,1,1,1,1,1,1,0,1,0,1,1,2,2,0,2,1,1,1,1,2,2,1,1,2,2,0,1,1,0,1,2,0,0,0,1,1,0,1,1,2,2,2,1,0,0,0,2,0,1,1,1,0,1,1,2,1,2,1,2,2,2,1,0,1,1,1,1,2,1,2,1,2,1,2…	MAGIv3.1_111650	MAGIv3.1_111650	chr01	118875531	Consistent
687	TIDP6426	mu	IDP1407	chr01	159	0.7	Co-Dominant	TGCE	ISU Map7	0,0,0,0,1,0,1,0,0,2,0,1,0,1,1,1,2,0,0,2,1,2,2,2,0,1,1,2,1,2,1,1,1,0,0,0,1,1,0,0,1,0,1,2,0,2,2,1,0,1,2,0,1,1,0,1,2,0,1,0,0,1,2,0,0,0,0,0,1,1,1,2,0,1,0,0,0,0,0,0,0,0,0,0,0,0,0,0,0,0,0,0,0,0,0,0,0,0,0,0,0,0,0,0,0,0,0,0,0,0,0,0,0,0,0,0,0,0,0,0,0,0,0,0,0,0,0,0,0,0,0,0,0,0,0,0,0,0,0,0,0,0,0,0,0,0,0,0,0,0,0,0,0,0,0,0,0,0,0,0,0,0,0,0,0,0,0,0,0,0,0,0,0,0,0,0,0,0,0,0,0,0,0,0,0,0,0,0,0,0,0,0,0,0,0,0,0,0,0,0…	MAGIv3.1_30382	MAGIv3.1_30382	chr01	140658572	Consistent
688	TIDP6390	mu	IDP1407	chr01	159	1.5	Co-Dominant	TGCE	ISU Map7	1,0,0,0,1,0,1,2,0,2,0,1,0,1,1,1,2,0,0,2,1,2,2,2,0,1,1,2,1,2,1,1,1,1,0,0,1,1,0,0,1,0,1,2,0,2,2,1,0,1,2,0,1,1,0,1,2,0,1,0,0,1,2,0,0,0,0,0,1,1,1,1,0,1,0,0,0,0,0,0,0,0,0,0,0,0,0,0,0,0,0,0,0,0,0,0,0,0,0,0,0,0,0,0,0,0,0,0,0,0,0,0,0,0,0,0,0,0,0,0,0,0,0,0,0,0,0,0,0,0,0,0,0,0,0,0,0,0,0,0,0,0,0,0,0,0,0,0,0,0,0,0,0,0,0,0,0,0,0,0,0,0,0,0,0,0,0,0,0,0,0,0,0,0,0,0,0,0,0,0,0,0,0,0,0,0,0,0,0,0,0,0,0,0,0,0,0,0,0,0…	MAGIv3.1_63133	MAGIv3.1_63133	chr01	160008029	Consistent
689	IDP6931	mu	IDP1407	chr01	159	1.1	Co-Dominant	Size	ISU Map7	1,2,0,1,1,2,1,2,0,2,2,1,1,1,1,1,2,0,0,1,1,2,2,1,1,1,0,2,1,2,1,1,1,1,0,0,1,1,0,2,1,1,1,2,2,2,2,1,2,1,2,2,1,1,2,1,2,0,0,2,1,1,2,0,2,1,1,1,0,1,1,1,1,1,1,2,0,2,1,2,1,0,0,1,0,2,2,1,2,2,1,2,2,1,2,1,1,2,1,1,1,2,0,1,1,2,2,1,2,0,2,1,2,2,2,1,2,2,0,2,1,2,1,2,0,0,1,1,1,0,1,1,0,1,0,1,1,2,2,0,2,1,1,1,0,1,2,2,1,2,2,0,1,1,2,1,2,0,0,0,2,1,0,2,1,2,2,1,1,0,0,0,2,0,1,1,1,0,1,1,2,1,0,1,2,2,1,1,0,1,1,1,1,2,1,2,1,2,1,2…	MAGIv3.1_14963	MAGIv3.1_14963	chr01	154359028	Consistent
690	fumc1076	mu	IDP1407	chr01	159	1	-	-	Genoplante Map	1,0,0,0,1,0,1,2,0,2,0,1,0,1,1,2,2,0,0,1,1,2,2,1,0,1,2,2,1,2,1,1,1,1,0,0,1,1,0,0,1,0,1,2,0,2,2,1,0,1,2,0,1,1,0,1,2,0,1,0,0,1,2,0,0,0,0,0,1,1,2,1,0,1,0,0,0,0,0,0,0,0,0,0,0,0,0,0,0,0,0,0,0,0,0,0,0,0,0,0,0,0,0,0,0,0,0,0,0,0,0,0,0,0,0,0,0,0,0,0,0,0,0,0,0,0,0,0,0,0,0,0,0,0,0,0,0,0,0,0,0,0,0,0,0,0,0,0,0,0,0,0,0,0,0,0,0,0,0,0,0,0,0,0,0,0,0,0,0,0,0,0,0,0,0,0,0,0,0,0,0,0,0,0,0,0,0,0,0,0,0,0,0,0,0,0,0,0,0,0…	CC761334,CC761335,G44748	CC761335	chr01	142567141	Consistent
691	TIDP6709	mu	IDP1407	chr01	159	1	Co-Dominant	TGCE	ISU Map7	1,0,0,0,1,0,1,2,0,2,0,1,0,1,2,2,2,0,0,1,1,2,2,1,0,1,2,2,1,2,1,1,1,1,0,0,1,1,0,0,1,0,1,2,0,2,2,1,0,1,2,0,1,1,0,1,2,0,1,0,0,1,2,0,0,0,0,0,1,1,2,2,0,1,0,0,0,0,0,0,0,0,0,0,0,0,0,0,0,0,0,0,0,0,0,0,0,0,0,0,0,0,0,0,0,0,0,0,0,0,0,0,0,0,0,0,0,0,0,0,0,0,0,0,0,0,0,0,0,0,0,0,0,0,0,0,0,0,0,0,0,0,0,0,0,0,0,0,0,0,0,0,0,0,0,0,0,0,0,0,0,0,0,0,0,0,0,0,0,0,0,0,0,0,0,0,0,0,0,0,0,0,0,0,0,0,0,0,0,0,0,0,0,0,0,0,0,0,0,0…	MAGIv3.1_23164	MAGIv3.1_23164	chr01	146043562	Consistent
692	TIDP6456	mu	IDP1407	chr01	159	0.4	Co-Dominant	TGCE	ISU Map7	1,0,0,0,1,0,1,2,0,2,0,1,0,1,1,2,2,0,0,1,1,2,2,1,0,1,2,2,1,2,1,1,1,1,0,0,1,1,0,0,1,0,1,2,0,2,2,1,0,1,2,0,1,1,0,1,2,0,1,0,0,1,2,0,0,0,0,0,1,1,1,2,0,1,0,0,0,0,0,0,0,0,0,0,0,0,0,0,0,0,0,0,0,0,0,0,0,0,0,0,0,0,0,0,0,0,0,0,0,0,0,0,0,0,0,0,0,0,0,0,0,0,0,0,0,0,0,0,0,0,0,0,0,0,0,0,0,0,0,0,0,0,0,0,0,0,0,0,0,0,0,0,0,0,0,0,0,0,0,0,0,0,0,0,0,0,0,0,0,0,0,0,0,0,0,0,0,0,0,0,0,0,0,0,0,0,0,0,0,0,0,0,0,0,0,0,0,0,0,0…	MAGIv3.1_41216	MAGIv3.1_41216	chr01	153758098	Consistent
693	TIDP5101	mu	IDP1407	chr01	159	0	Co-Dominant	TGCE	ISU Map7	1,0,0,0,1,0,1,2,0,2,0,1,0,1,1,2,2,0,0,1,1,2,2,1,0,1,2,2,1,2,1,1,1,1,0,0,1,1,0,0,1,0,1,2,0,2,2,1,0,1,2,0,1,1,0,1,2,0,1,0,0,1,2,0,0,0,0,0,1,1,1,2,0,1,0,0,0,0,0,0,0,0,0,0,0,0,0,0,0,0,0,0,0,0,0,0,0,0,0,0,0,0,0,0,0,0,0,0,0,0,0,0,0,0,0,0,0,0,0,0,0,0,0,0,0,0,0,0,0,0,0,0,0,0,0,0,0,0,0,0,0,0,0,0,0,0,0,0,0,0,0,0,0,0,0,0,0,0,0,0,0,0,0,0,0,0,0,0,0,0,0,0,0,0,0,0,0,0,0,0,0,0,0,0,0,0,0,0,0,0,0,0,0,0,0,0,0,0,0,0…	MAGIv3.1_89175	MAGIv3.1_89175	chr01	146809929	Consistent
694	TIDP5786	mu	IDP1407	chr01	159	0	Co-Dominant	TGCE	ISU Map7	1,0,0,0,1,0,1,2,0,2,0,1,0,1,1,2,2,0,0,1,1,2,2,1,0,1,2,2,1,2,1,1,1,1,0,0,1,1,0,0,1,0,1,2,0,2,2,1,0,1,2,0,1,1,0,1,2,0,1,0,0,1,2,0,0,0,0,0,1,1,1,2,0,1,0,0,0,0,0,0,0,0,0,0,0,0,0,0,0,0,0,0,0,0,0,0,0,0,0,0,0,0,0,0,0,0,0,0,0,0,0,0,0,0,0,0,0,0,0,0,0,0,0,0,0,0,0,0,0,0,0,0,0,0,0,0,0,0,0,0,0,0,0,0,0,0,0,0,0,0,0,0,0,0,0,0,0,0,0,0,0,0,0,0,0,0,0,0,0,0,0,0,0,0,0,0,0,0,0,0,0,0,0,0,0,0,0,0,0,0,0,0,0,0,0,0,0,0,0,0…	MAGIv3.1_43270	MAGIv3.1_43270	chr01	154129373	Consistent
695	IDP2551	mu	IDP1407	chr01	159	0	Dominant	-/+	ISU Map7	1,0,0,0,1,0,1,2,0,2,0,1,0,1,1,2,2,0,0,1,1,2,2,1,0,1,2,2,1,2,1,1,1,1,0,0,1,1,0,0,1,0,1,2,0,2,2,1,0,1,2,0,1,1,0,1,2,0,1,0,0,1,2,0,0,0,0,0,1,1,1,2,0,1,0,0,0,0,0,0,0,0,0,0,0,0,0,0,0,0,0,0,0,0,0,0,0,0,0,0,0,0,0,0,0,0,0,0,0,0,0,0,0,0,0,0,0,0,0,0,0,0,0,0,0,0,0,0,0,0,0,0,0,0,0,0,0,0,0,0,0,0,0,0,0,0,0,0,0,0,0,0,0,0,0,0,0,0,0,0,0,0,0,0,0,0,0,0,0,0,0,0,0,0,0,0,0,0,0,0,0,0,0,0,0,0,0,0,0,0,0,0,0,0,0,0,0,0,0,0…	MEC_43057_P95-Mar06	-	-	-	-
696	IDP2572	mu	IDP1407	chr01	159	0	Dominant	+/-	ISU Map7	1,0,0,0,1,0,1,2,0,2,0,1,0,1,1,2,2,0,0,1,1,2,2,1,0,1,2,2,1,2,1,1,1,1,0,0,1,1,0,0,1,0,1,2,0,2,2,1,0,1,2,0,1,1,0,1,2,0,1,0,0,1,2,0,0,0,0,0,1,1,1,2,0,1,0,0,0,0,0,0,0,0,0,0,0,0,0,0,0,0,0,0,0,0,0,0,0,0,0,0,0,0,0,0,0,0,0,0,0,0,0,0,0,0,0,0,0,0,0,0,0,0,0,0,0,0,0,0,0,0,0,0,0,0,0,0,0,0,0,0,0,0,0,0,0,0,0,0,0,0,0,0,0,0,0,0,0,0,0,0,0,0,0,0,0,0,0,0,0,0,0,0,0,0,0,0,0,0,0,0,0,0,0,0,0,0,0,0,0,0,0,0,0,0,0,0,0,0,0,0…	BM073177	BM073177	chr06	31938108	Inconsistent
697	TIDP6710	mu	IDP1407	chr01	159	0	Co-Dominant	TGCE	ISU Map7	1,0,0,0,1,0,1,2,0,2,0,1,0,1,1,0,2,0,0,1,1,2,2,1,0,1,2,2,1,2,1,1,1,1,0,0,1,1,0,0,1,0,1,2,0,2,2,1,0,1,2,0,1,1,0,1,2,0,1,0,0,1,2,0,0,0,0,0,1,1,1,2,0,1,0,0,0,0,0,0,0,0,0,0,0,0,0,0,0,0,0,0,0,0,0,0,0,0,0,0,0,0,0,0,0,0,0,0,0,0,0,0,0,0,0,0,0,0,0,0,0,0,0,0,0,0,0,0,0,0,0,0,0,0,0,0,0,0,0,0,0,0,0,0,0,0,0,0,0,0,0,0,0,0,0,0,0,0,0,0,0,0,0,0,0,0,0,0,0,0,0,0,0,0,0,0,0,0,0,0,0,0,0,0,0,0,0,0,0,0,0,0,0,0,0,0,0,0,0,0…	MAGIv3.1_28604	MAGIv3.1_28604	chr01	151801526	Consistent
698	TIDP2970	mu	IDP1407	chr01	159	0	Co-Dominant	TGCE	ISU Map7	1,0,0,0,1,0,1,2,0,2,0,1,0,1,1,2,2,0,0,1,1,2,2,1,0,1,2,2,1,2,1,1,1,1,0,0,1,1,0,0,1,0,1,2,0,2,2,1,0,1,2,0,1,1,0,1,2,0,1,0,0,1,2,0,0,0,0,0,1,1,1,2,0,1,0,0,0,0,0,0,0,0,0,0,0,0,0,0,0,0,0,0,0,0,0,0,0,0,0,0,0,0,0,0,0,0,0,0,0,0,0,0,0,0,0,0,0,0,0,0,0,0,0,0,0,0,0,0,0,0,0,0,0,0,0,0,0,0,0,0,0,0,0,0,0,0,0,0,0,0,0,0,0,0,0,0,0,0,0,0,0,0,0,0,0,0,0,0,0,0,0,0,0,0,0,0,0,0,0,0,0,0,0,0,0,0,0,0,0,0,0,0,0,0,0,0,0,0,0,0…	BM335595	-	-	-	-
699	TIDP5565	mu	IDP1407	chr01	159	0	Co-Dominant	TGCE	ISU Map7	0,0,0,0,1,0,1,2,0,2,0,1,0,1,1,2,2,0,0,1,1,2,2,1,0,1,2,2,1,2,1,1,1,1,0,0,1,1,0,0,1,0,1,2,0,2,2,1,0,1,2,0,1,1,0,1,2,0,1,0,0,1,2,0,0,0,0,0,1,1,1,2,0,1,0,0,0,0,0,0,0,0,0,0,0,0,0,0,0,0,0,0,0,0,0,0,0,0,0,0,0,0,0,0,0,0,0,0,0,0,0,0,0,0,0,0,0,0,0,0,0,0,0,0,0,0,0,0,0,0,0,0,0,0,0,0,0,0,0,0,0,0,0,0,0,0,0,0,0,0,0,0,0,0,0,0,0,0,0,0,0,0,0,0,0,0,0,0,0,0,0,0,0,0,0,0,0,0,0,0,0,0,0,0,0,0,0,0,0,0,0,0,0,0,0,0,0,0,0,0…	MAGIv3.1_24210	MAGIv3.1_24210	chr01	140745542	Consistent
700	TIDP8798	mu	IDP1407	chr01	159	0	Co-Dominant	TGCE	ISU Map7	1,0,0,0,1,0,1,2,0,2,0,1,0,1,1,2,2,0,0,1,1,0,2,1,0,1,2,2,1,2,1,1,1,1,0,0,1,1,0,0,1,0,1,2,0,2,2,1,0,1,2,0,1,1,0,1,2,0,1,0,0,1,2,0,0,0,0,0,1,1,1,2,0,1,0,0,0,0,0,0,0,0,0,0,0,0,0,0,0,0,0,0,0,0,0,0,0,0,0,0,0,0,0,0,0,0,0,0,0,0,0,0,0,0,0,0,0,0,0,0,0,0,0,0,0,0,0,0,0,0,0,0,0,0,0,0,0,0,0,0,0,0,0,0,0,0,0,0,0,0,0,0,0,0,0,0,0,0,0,0,0,0,0,0,0,0,0,0,0,0,0,0,0,0,0,0,0,0,0,0,0,0,0,0,0,0,0,0,0,0,0,0,0,0,0,0,0,0,0,0…	MAGIv3.1_20055	MAGIv3.1_20055	chr01	145931054	Consistent
701	IDP4273	mu	IDP1407	chr01	159	0.4	Dominant	-/+	ISU Map7	1,0,0,0,1,0,1,2,0,2,0,1,0,1,1,2,2,0,0,1,1,2,2,1,0,1,2,2,1,2,1,1,1,1,0,0,1,1,0,0,1,0,1,2,0,2,2,1,0,1,2,0,1,1,0,1,2,0,1,0,0,1,2,0,0,0,0,0,1,1,1,1,0,1,0,0,0,0,0,0,0,0,0,0,0,0,0,0,0,0,0,0,0,0,0,0,0,0,0,0,0,0,0,0,0,0,0,0,0,0,0,0,0,0,0,0,0,0,0,0,0,0,0,0,0,0,0,0,0,0,0,0,0,0,0,0,0,0,0,0,0,0,0,0,0,0,0,0,0,0,0,0,0,0,0,0,0,0,0,0,0,0,0,0,0,0,0,0,0,0,0,0,0,0,0,0,0,0,0,0,0,0,0,0,0,0,0,0,0,0,0,0,0,0,0,0,0,0,0,0…	MAGIv3.1_36121	MAGIv3.1_36121	chr04	60318619	Inconsistent
702	TIDP3719	mu	IDP1407	chr01	159	0	Co-Dominant	TGCE	ISU Map7	1,0,0,0,1,0,1,2,0,2,0,1,0,0,1,2,2,0,0,1,1,2,2,1,0,1,2,2,1,2,1,1,1,1,0,0,1,1,0,0,1,0,1,2,0,2,2,1,0,1,2,0,1,1,0,1,2,0,1,0,0,1,2,0,0,0,0,0,1,1,1,0,0,1,0,0,0,0,0,0,0,0,0,0,0,0,0,0,0,0,0,0,0,0,0,0,0,0,0,0,0,0,0,0,0,0,0,0,0,0,0,0,0,0,0,0,0,0,0,0,0,0,0,0,0,0,0,0,0,0,0,0,0,0,0,0,0,0,0,0,0,0,0,0,0,0,0,0,0,0,0,0,0,0,0,0,0,0,0,0,0,0,0,0,0,0,0,0,0,0,0,0,0,0,0,0,0,0,0,0,0,0,0,0,0,0,0,0,0,0,0,0,0,0,0,0,0,0,0,0…	BG841194	-	-	-	-
703	frz323a	mu	IDP1407	chr01	159	0	-	-	Genoplante Map	1,0,0,0,1,0,1,2,0,2,0,1,0,1,1,2,2,0,0,0,1,2,2,1,0,1,2,2,1,2,1,1,1,1,0,0,1,1,0,0,1,0,1,2,0,2,2,1,0,1,2,0,1,1,0,1,2,0,1,0,0,1,2,0,0,0,0,0,1,1,0,0,0,1,0,0,0,0,0,0,0,0,0,0,0,0,0,0,0,0,0,0,0,0,0,0,0,0,0,0,0,0,0,0,0,0,0,0,0,0,0,0,0,0,0,0,0,0,0,0,0,0,0,0,0,0,0,0,0,0,0,0,0,0,0,0,0,0,0,0,0,0,0,0,0,0,0,0,0,0,0,0,0,0,0,0,0,0,0,0,0,0,0,0,0,0,0,0,0,0,0,0,0,0,0,0,0,0,0,0,0,0,0,0,0,0,0,0,0,0,0,0,0,0,0,0,0,0,0,0…	-	-	-	-	-
704	gnp_QBK19c11	mu	IDP1407	chr01	159	0	-	-	Genoplante Map	1,0,0,0,1,0,1,2,0,2,0,1,0,1,0,2,2,0,0,1,1,2,2,1,0,1,2,2,1,2,1,1,1,1,0,0,1,0,0,0,0,0,1,2,0,0,0,1,0,1,2,0,0,1,0,1,2,0,0,0,0,1,2,0,0,0,0,0,1,1,0,1,0,0,0,0,0,0,0,0,0,0,0,0,0,0,0,0,0,0,0,0,0,0,0,0,0,0,0,0,0,0,0,0,0,0,0,0,0,0,0,0,0,0,0,0,0,0,0,0,0,0,0,0,0,0,0,0,0,0,0,0,0,0,0,0,0,0,0,0,0,0,0,0,0,0,0,0,0,0,0,0,0,0,0,0,0,0,0,0,0,0,0,0,0,0,0,0,0,0,0,0,0,0,0,0,0,0,0,0,0,0,0,0,0,0,0,0,0,0,0,0,0,0,0,0,0,0,0,0…	CF012678	CF012678	chr04	61477503	Inconsistent
705	IDP4848	mu	IDP1407	chr01	159	0	Dominant	+/-	ISU Map7	1,0,0,0,1,0,1,2,0,2,0,1,0,1,1,2,2,0,0,1,1,2,2,1,0,1,2,2,1,2,1,1,1,1,0,0,1,1,0,0,1,0,1,2,0,2,2,1,0,1,2,0,1,1,0,1,2,0,1,0,0,1,2,0,0,0,0,0,1,1,1,1,0,1,0,0,0,0,0,0,0,0,0,0,0,0,0,0,0,0,0,0,0,0,0,0,0,0,0,0,0,0,0,0,0,0,0,0,0,0,0,0,0,0,0,0,0,0,0,0,0,0,0,0,0,0,0,0,0,0,0,0,0,0,0,0,0,0,0,0,0,0,0,0,0,0,0,0,0,0,0,0,0,0,0,0,0,0,0,0,0,0,0,0,0,0,0,0,0,0,0,0,0,0,0,0,0,0,0,0,0,0,0,0,0,0,0,0,0,0,0,0,0,0,0,0,0,0,0,0…	MAGIv3.1_32488	MAGIv3.1_32488	chr01	154046317	Consistent
706	rz323a	mu	IDP1407	chr01	159	0	-	-	MMP	1,0,2,0,1,0,1,2,1,2,0,1,1,1,1,2,2,2,1,0,1,2,2,1,1,1,2,2,1,2,1,1,1,1,1,1,1,1,1,0,1,1,1,2,2,2,2,1,0,1,2,2,1,1,2,1,2,2,1,0,0,1,2,2,0,0,0,0,1,1,0,0,0,1,1,2,1,2,0,2,1,2,1,1,0,2,2,1,2,2,1,2,0,1,2,0,0,2,1,0,0,2,1,0,1,2,2,0,2,0,0,1,0,1,1,1,2,2,1,2,1,2,1,2,1,0,1,2,1,1,0,1,1,0,0,0,0,2,0,0,2,0,1,1,2,1,0,1,1,0,2,1,1,0,2,1,2,1,2,0,0,1,1,0,0,0,0,2,1,2,1,1,2,1,0,1,1,1,1,1,2,1,2,1,2,0,0,1,1,0,0,0,1,2,1,2,0,2,1,2…	-	-	-	-	-
707	umc1076	mu	IDP1407	chr01	159	0	-	-	MMP	1,0,2,0,1,0,1,2,1,2,2,1,1,1,1,2,2,2,1,1,0,2,2,1,1,1,2,2,1,2,1,1,1,1,1,1,1,1,1,2,1,1,1,2,2,2,2,1,0,1,2,2,1,1,2,1,2,2,1,0,0,1,2,2,0,0,1,0,1,1,0,0,0,1,1,2,1,2,0,2,1,2,1,1,2,2,2,1,2,2,1,2,0,1,2,0,0,2,1,0,2,2,1,1,1,2,2,0,2,1,0,1,0,1,2,1,2,2,1,2,1,2,1,2,1,1,1,2,1,1,0,1,1,1,1,0,1,2,2,0,2,0,1,1,2,1,0,1,1,0,2,1,1,0,2,1,2,1,2,0,0,1,1,1,2,2,0,2,1,2,1,1,2,1,1,1,1,1,1,1,2,1,2,1,2,1,1,1,1,0,1,1,1,2,1,2,0,2,1,2…	CC761334,CC761335,G44748	CC761335	chr01	142567141	Consistent
708	umc1703	mu	IDP1407	chr01	159	0	-	-	MMP	1,0,2,0,1,0,1,2,1,2,2,1,1,1,1,2,2,2,1,1,1,2,2,1,1,1,2,2,1,2,1,1,1,1,1,1,1,1,1,2,1,1,1,2,2,2,2,1,0,1,2,2,1,1,2,1,2,2,1,0,0,1,2,2,0,0,1,0,1,1,0,1,0,1,1,2,1,2,0,2,1,2,1,1,2,2,2,1,2,2,1,2,0,1,2,0,0,2,1,0,1,2,1,1,1,2,2,0,2,1,1,1,0,2,2,1,2,2,1,2,1,2,1,2,0,1,1,2,1,1,0,1,1,1,1,0,1,2,2,0,2,0,1,1,2,1,0,2,1,0,2,1,1,0,2,1,2,1,2,0,0,1,1,1,1,2,0,1,1,2,1,1,2,1,1,1,1,1,1,1,2,1,2,1,2,1,1,1,1,0,1,1,1,2,1,2,0,2,1,2…	-	-	-	-	-
709	TIDP5752	mu	IDP1407	chr01	159	1	Co-Dominant	TGCE	ISU Map7	1,0,0,0,1,0,1,2,0,2,0,1,0,1,1,2,2,0,0,1,1,2,2,1,0,1,2,2,1,2,1,1,1,1,0,0,1,1,0,0,1,0,1,2,0,2,2,1,0,1,0,0,1,1,0,1,2,0,1,0,0,1,2,0,0,0,0,0,1,1,1,1,0,1,0,0,0,0,0,0,0,0,0,0,0,0,0,0,0,0,0,0,0,0,0,0,0,0,0,0,0,0,0,0,0,0,0,0,0,0,0,0,0,0,0,0,0,0,0,0,0,0,0,0,0,0,0,0,0,0,0,0,0,0,0,0,0,0,0,0,0,0,0,0,0,0,0,0,0,0,0,0,0,0,0,0,0,0,0,0,0,0,0,0,0,0,0,0,0,0,0,0,0,0,0,0,0,0,0,0,0,0,0,0,0,0,0,0,0,0,0,0,0,0,0,0,0,0,0,0…	MAGIv3.1_50976	MAGIv3.1_50976	chr01	146380670	Consistent
710	TIDP3298	mu	IDP1407	chr01	159	0	Co-Dominant	TGCE	ISU Map7	1,0,0,0,1,0,1,2,0,2,0,1,0,1,1,2,2,0,0,1,1,2,2,1,0,1,2,2,1,2,1,1,1,1,0,0,1,1,0,0,1,0,1,2,0,2,2,1,0,1,2,0,1,1,0,1,2,0,1,0,0,1,2,0,0,0,0,0,1,1,1,0,0,0,0,0,0,0,0,0,0,0,0,0,0,0,0,0,0,0,0,0,0,0,0,0,0,0,0,0,0,0,0,0,0,0,0,0,0,0,0,0,0,0,0,0,0,0,0,0,0,0,0,0,0,0,0,0,0,0,0,0,0,0,0,0,0,0,0,0,0,0,0,0,0,0,0,0,0,0,0,0,0,0,0,0,0,0,0,0,0,0,0,0,0,0,0,0,0,0,0,0,0,0,0,0,0,0,0,0,0,0,0,0,0,0,0,0,0,0,0,0,0,0,0,0,0,0,0,0…	MEC_99682_P95-Mar06	-	-	-	-
711	IDP2571	mu	IDP1407	chr01	159	0.4	Dominant	+/-	ISU Map7	1,0,0,0,1,0,1,2,0,2,0,1,0,1,1,2,2,0,0,1,1,2,2,1,0,1,2,2,1,2,1,1,1,1,0,0,1,1,0,0,1,0,1,2,0,2,2,1,0,1,2,0,1,1,0,1,2,0,1,0,0,1,2,0,0,0,0,0,1,1,1,1,0,1,0,0,0,0,0,0,0,0,0,0,0,0,0,0,0,0,0,0,0,0,0,0,0,0,0,0,0,0,0,0,0,0,0,0,0,0,0,0,0,0,0,0,0,0,0,0,0,0,0,0,0,0,0,0,0,0,0,0,0,0,0,0,0,0,0,0,0,0,0,0,0,0,0,0,0,0,0,0,0,0,0,0,0,0,0,0,0,0,0,0,0,0,0,0,0,0,0,0,0,0,0,0,0,0,0,0,0,0,0,0,0,0,0,0,0,0,0,0,0,0,0,0,0,0,0,0…	BM072750	BM072750	chr01	156092126	Consistent
712	TIDP5304	mu	IDP1407	chr01	159	0.4	Co-Dominant	TGCE	ISU Map7	1,0,0,0,1,0,1,2,0,2,0,1,0,1,0,2,2,0,0,1,1,2,2,1,0,1,2,2,0,2,1,1,1,1,0,0,1,1,0,0,1,0,1,2,0,2,2,1,0,1,2,0,1,1,0,1,2,0,1,0,0,1,2,0,0,0,0,0,1,0,1,1,0,1,0,0,0,0,0,0,0,0,0,0,0,0,0,0,0,0,0,0,0,0,0,0,0,0,0,0,0,0,0,0,0,0,0,0,0,0,0,0,0,0,0,0,0,0,0,0,0,0,0,0,0,0,0,0,0,0,0,0,0,0,0,0,0,0,0,0,0,0,0,0,0,0,0,0,0,0,0,0,0,0,0,0,0,0,0,0,0,0,0,0,0,0,0,0,0,0,0,0,0,0,0,0,0,0,0,0,0,0,0,0,0,0,0,0,0,0,0,0,0,0,0,0,0,0,0,0…	MAGIv3.1_88584	MAGIv3.1_88584	chr01	158521260	Consistent
713	cdo344c	mu	IDP1407	chr01	159	0	-	-	MMP	1,0,2,0,1,0,1,2,1,2,0,1,1,1,1,2,2,2,1,0,1,2,2,1,1,1,2,2,1,2,1,1,1,1,1,1,1,1,1,0,1,1,1,2,2,2,2,1,0,1,2,2,1,1,2,1,2,2,1,0,0,1,2,2,0,0,0,0,1,1,1,1,0,1,1,2,1,0,0,2,1,2,1,1,0,2,2,0,2,2,1,2,0,1,2,0,0,2,1,0,0,2,0,0,2,1,2,0,2,2,0,1,0,1,1,1,2,2,1,2,1,2,1,2,1,0,1,2,1,1,0,1,0,0,0,0,0,2,0,2,2,0,1,1,2,1,0,2,1,0,2,1,1,0,2,1,2,1,2,2,0,1,1,0,1,0,0,1,1,2,1,1,0,1,0,1,1,1,1,1,2,1,2,1,2,2,0,1,1,0,0,0,1,2,1,2,0,2,1,2…	-	-	-	-	-
714	TIDP5538	mu	IDP1407	chr01	159	0	Co-Dominant	TGCE	ISU Map7	1,0,0,0,1,0,1,2,0,2,0,1,0,1,1,2,2,0,0,1,1,2,2,1,0,1,2,2,1,2,1,1,1,1,0,0,1,1,0,0,1,0,1,2,0,2,2,1,0,1,2,0,1,1,0,1,2,0,1,0,0,1,2,0,0,0,0,0,1,1,1,1,0,1,0,0,0,0,0,0,0,0,0,0,0,0,0,0,0,0,0,0,0,0,0,0,0,0,0,0,0,0,0,0,0,0,0,0,0,0,0,0,0,0,0,0,0,0,0,0,0,0,0,0,0,0,0,0,0,0,0,0,0,0,0,0,0,0,0,0,0,0,0,0,0,0,0,0,0,0,0,0,0,0,0,0,0,0,0,0,0,0,0,0,0,0,0,0,0,0,0,0,0,0,0,0,0,0,0,0,0,0,0,0,0,0,0,0,0,0,0,0,0,0,0,0,0,0,0,0…	MAGIv3.1_92472	MAGIv3.1_92472	chr01	160267882	Consistent
715	IDP4228	mu	IDP1407	chr01	159	0	Co-Dominant	Size	ISU Map7	1,0,0,0,1,0,1,2,0,2,0,1,0,1,1,2,2,0,0,1,1,2,2,1,0,1,2,2,1,2,1,1,1,1,0,0,1,1,0,0,1,0,1,2,0,2,2,1,0,1,2,0,1,1,0,1,2,0,1,0,0,1,2,0,0,0,0,0,1,1,1,1,0,1,0,0,0,0,0,0,0,0,0,0,0,0,0,0,0,0,0,0,0,0,0,0,0,0,0,0,0,0,0,0,0,0,0,0,0,0,0,0,0,0,0,0,0,0,0,0,0,0,0,0,0,0,0,0,0,0,0,0,0,0,0,0,0,0,0,0,0,0,0,0,0,0,0,0,0,0,0,0,0,0,0,0,0,0,0,0,0,0,0,0,0,0,0,0,0,0,0,0,0,0,0,0,0,0,0,0,0,0,0,0,0,0,0,0,0,0,0,0,0,0,0,0,0,0,0,0…	MAGIv3.1_92472	MAGIv3.1_92472	chr01	160267882	Consistent
716	IDP6948	mu	IDP1407	chr01	159	0	Dominant	+/-	ISU Map7	1,0,0,0,1,0,1,2,0,2,0,1,0,1,1,2,2,0,0,1,1,2,2,1,0,1,2,2,1,2,1,1,1,1,0,0,1,1,0,0,1,0,1,2,0,2,2,1,0,1,2,0,1,1,0,1,2,0,1,0,0,1,2,0,0,0,0,0,1,1,1,1,0,1,0,0,0,0,0,0,0,0,0,0,0,0,0,0,0,0,0,0,0,0,0,0,0,0,0,0,0,0,0,0,0,0,0,0,0,0,0,0,0,0,0,0,0,0,0,0,0,0,0,0,0,0,0,0,0,0,0,0,0,0,0,0,0,0,0,0,0,0,0,0,0,0,0,0,0,0,0,0,0,0,0,0,0,0,0,0,0,0,0,0,0,0,0,0,0,0,0,0,0,0,0,0,0,0,0,0,0,0,0,0,0,0,0,0,0,0,0,0,0,0,0,0,0,0,0,0…	MAGIv3.1_46363	MAGIv3.1_46363	chr01	157217697	Consistent
717	TIDP5272	mu	IDP1407	chr01	159	0	Co-Dominant	TGCE	ISU Map7	1,0,0,0,1,0,1,0,0,2,0,1,0,1,1,2,2,0,0,1,1,2,2,1,0,1,2,2,1,2,1,1,1,1,0,0,1,1,0,0,1,0,1,2,0,2,2,1,0,1,2,0,1,1,0,1,2,0,1,0,0,1,2,0,0,0,0,0,1,1,1,1,0,1,0,0,0,0,0,0,0,0,0,0,0,0,0,0,0,0,0,0,0,0,0,0,0,0,0,0,0,0,0,0,0,0,0,0,0,0,0,0,0,0,0,0,0,0,0,0,0,0,0,0,0,0,0,0,0,0,0,0,0,0,0,0,0,0,0,0,0,0,0,0,0,0,0,0,0,0,0,0,0,0,0,0,0,0,0,0,0,0,0,0,0,0,0,0,0,0,0,0,0,0,0,0,0,0,0,0,0,0,0,0,0,0,0,0,0,0,0,0,0,0,0,0,0,0,0,0…	MAGIv3.1_79966	MAGIv3.1_79966	chr01	160340394	Consistent
718	lgm0365	mu	IDP1407	chr01	159	0.8	-	-	Genoplante Map	0,0,0,0,1,0,1,2,0,2,0,1,0,1,1,1,2,0,0,1,1,2,2,1,0,1,2,2,1,2,1,1,1,1,0,0,1,1,0,0,1,0,1,2,0,2,2,0,0,1,2,0,1,1,0,1,2,0,1,0,0,1,2,0,0,0,0,0,1,1,1,1,0,1,0,0,0,0,0,0,0,0,0,0,0,0,0,0,0,0,0,0,0,0,0,0,0,0,0,0,0,0,0,0,0,0,0,0,0,0,0,0,0,0,0,0,0,0,0,0,0,0,0,0,0,0,0,0,0,0,0,0,0,0,0,0,0,0,0,0,0,0,0,0,0,0,0,0,0,0,0,0,0,0,0,0,0,0,0,0,0,0,0,0,0,0,0,0,0,0,0,0,0,0,0,0,0,0,0,0,0,0,0,0,0,0,0,0,0,0,0,0,0,0,0,0,0,0,0,0…	-	-	-	-	-
719	lgm2833	mu	IDP1407	chr01	159	0	-	-	Genoplante Map	0,0,0,0,1,0,1,2,0,2,0,1,0,1,1,1,2,0,0,1,1,2,2,1,0,1,2,2,1,2,1,1,1,1,0,0,1,1,0,0,1,0,1,2,0,2,0,1,0,1,2,0,1,1,0,1,2,0,1,0,0,1,0,0,0,0,0,0,1,1,1,1,0,1,0,0,0,0,0,0,0,0,0,0,0,0,0,0,0,0,0,0,0,0,0,0,0,0,0,0,0,0,0,0,0,0,0,0,0,0,0,0,0,0,0,0,0,0,0,0,0,0,0,0,0,0,0,0,0,0,0,0,0,0,0,0,0,0,0,0,0,0,0,0,0,0,0,0,0,0,0,0,0,0,0,0,0,0,0,0,0,0,0,0,0,0,0,0,0,0,0,0,0,0,0,0,0,0,0,0,0,0,0,0,0,0,0,0,0,0,0,0,0,0,0,0,0,0,0,0…	-	-	-	-	-
720	umc2231	mu	IDP1407	chr01	159	0	-	-	MMP	1,0,2,0,1,0,1,2,1,2,2,1,1,1,1,0,0,2,1,1,1,2,2,1,0,1,2,0,1,2,0,1,1,1,1,1,1,1,1,0,1,1,1,2,2,2,2,1,0,1,0,2,0,1,0,1,0,2,0,0,0,1,2,2,0,0,1,0,1,1,1,1,0,1,1,0,1,2,0,2,1,2,1,1,0,2,2,1,2,2,1,2,0,1,2,0,0,2,1,0,1,2,1,1,1,2,2,0,2,1,0,1,0,2,2,1,2,2,1,2,1,2,1,2,0,0,1,2,1,1,0,1,1,0,0,0,0,2,2,0,2,0,1,1,2,1,0,2,1,0,2,1,1,0,2,1,2,1,2,0,0,1,1,0,1,0,0,1,1,2,1,1,2,1,1,1,1,1,1,1,2,1,2,1,2,1,1,0,1,0,1,1,0,0,1,2,0,2,0,0…	AC213759,CC825176,CC825177,BG517609,CC822504,CC822626,CC822505	BG517609	chr01	156259609	Consistent
721	umc1676	mu	IDP1407	chr01	159	1.3	-	-	MMP	1,0,2,0,1,0,1,2,1,2,1,1,1,1,1,1,0,2,1,1,1,2,0,1,1,1,2,2,1,2,1,1,1,1,1,1,1,1,1,2,1,1,1,2,2,2,2,1,0,1,2,2,1,1,2,1,2,2,1,0,0,1,2,2,0,0,1,0,1,1,1,1,0,1,1,2,1,2,0,2,1,2,1,1,2,2,2,1,2,2,1,0,0,0,0,0,0,2,1,0,2,2,1,1,1,2,2,0,2,1,2,1,0,2,2,1,2,2,1,2,1,0,1,2,2,1,1,2,1,1,0,1,1,1,1,0,1,2,2,1,2,0,1,1,2,1,0,1,1,0,2,1,1,0,2,1,2,1,2,1,0,1,1,1,2,2,0,2,1,2,1,1,2,1,1,1,1,1,1,1,2,1,0,1,2,0,1,1,2,0,2,1,1,2,1,2,0,2,1,1…	CC785255,AY112586,CC758086,CC758085	CC758086	chr01	148630198	Consistent
722	mmp101	mu	IDP1407	chr01	159	1	-	-	MMP	1,0,2,0,1,0,1,2,1,2,2,1,0,1,1,2,2,2,1,2,1,2,2,1,0,1,2,0,1,2,0,1,1,1,1,1,1,1,1,2,1,0,1,2,2,2,2,1,0,1,0,2,0,1,0,0,0,2,0,0,0,1,2,2,0,0,0,0,1,1,2,2,0,0,1,2,1,2,0,2,1,2,1,1,2,0,0,1,2,2,1,0,0,1,2,0,0,0,1,0,2,0,1,0,0,2,2,0,2,1,2,0,0,2,0,1,0,0,1,0,1,0,0,0,2,0,1,2,1,1,0,1,1,1,1,0,1,2,2,0,2,0,1,1,2,1,0,1,1,0,2,1,1,0,2,1,2,1,2,0,0,1,1,1,2,2,0,2,1,2,1,1,2,1,1,1,1,1,1,1,2,1,2,1,2,1,1,1,1,0,1,1,1,2,1,2,0,2,1,2…	CC756566,AZ916014,CC149311,CC756567	-	-	-	-
723	uaz246c	mu	IDP1407	chr01	159	0.8	-	-	MMP	1,0,2,0,1,0,1,2,1,2,2,1,0,1,1,2,2,0,1,2,1,2,2,1,2,1,2,2,1,2,0,1,1,1,1,1,1,1,1,2,1,0,1,2,2,2,2,1,0,1,0,2,0,1,0,0,0,2,0,0,0,1,2,2,0,0,1,0,1,1,2,2,0,1,1,2,1,2,0,2,0,2,1,1,2,0,2,1,2,2,1,2,0,1,2,0,0,2,1,0,2,2,1,0,1,2,2,0,2,1,0,0,0,1,2,1,0,0,1,0,1,2,0,2,2,0,1,2,1,1,0,1,1,1,1,0,1,2,2,0,2,0,1,1,2,2,0,1,1,0,2,1,1,0,2,1,2,1,2,0,0,1,2,1,2,2,0,2,1,2,1,1,2,1,1,1,1,1,1,1,2,1,2,1,2,0,1,1,1,0,1,1,1,2,1,2,0,2,1,0…	-	-	-	-	-
724	mmp143	mu	IDP1407	chr01	159	1.4	-	-	MMP	1,0,2,0,1,0,1,2,0,2,2,1,0,1,1,2,2,0,1,1,1,2,2,1,0,1,2,2,1,2,0,1,1,1,1,1,1,1,1,2,1,1,1,2,2,2,2,1,0,1,2,2,0,1,0,0,2,2,1,0,0,1,2,2,0,0,1,0,1,1,2,2,0,1,1,2,1,2,0,2,1,2,1,1,2,0,2,1,2,2,1,0,0,1,2,0,0,0,1,0,2,2,1,0,0,2,2,0,2,1,0,0,0,1,0,1,0,0,0,2,1,0,0,0,1,0,1,2,1,1,0,1,1,1,1,0,1,2,2,2,2,0,1,1,2,2,0,1,1,0,2,1,1,0,2,1,2,1,2,0,0,1,1,1,2,2,0,2,1,2,1,1,2,1,1,1,1,1,1,1,2,1,2,1,2,1,1,1,1,0,1,1,1,2,1,2,0,2,1,2…	AZ916335	AZ916335	chr03	28259825	Inconsistent
725	AY111680	mu	IDP1407	chr01	159	1.9	-	-	MMP	1,0,2,0,1,0,1,2,1,1,2,1,1,1,1,2,2,2,1,1,1,2,2,1,2,1,2,2,1,2,1,1,1,1,1,1,1,1,1,2,1,1,1,2,2,2,2,1,0,1,2,2,1,1,2,0,2,2,1,0,0,1,1,0,0,0,1,0,1,1,2,2,0,1,1,0,2,2,0,2,1,2,1,1,0,2,2,1,2,2,1,2,0,1,0,0,0,2,1,0,2,2,1,1,1,2,2,0,2,1,0,1,0,1,2,1,2,2,1,2,1,0,1,0,0,0,1,2,1,1,0,1,1,0,0,0,0,2,2,0,2,0,1,1,2,2,0,1,1,0,2,1,1,0,2,1,2,1,2,0,0,1,1,1,2,0,0,2,1,2,1,1,2,1,1,1,1,1,1,1,2,1,2,1,2,1,1,1,2,0,1,1,0,0,1,2,0,2,0,2…	AC205373,AY111680,CC831640,CC750904,CC831641,AI677012,AW520224,CC750905	AY111680,AI677012	chr01	103318550	Consistent
726	AY109646	mu	IDP1407	chr01	159	1.2	-	-	MMP	1,0,2,0,1,0,1,1,1,1,2,1,1,0,1,2,2,1,1,1,1,1,2,1,2,1,2,2,1,2,1,1,1,1,1,1,1,0,1,0,1,1,1,2,2,2,2,1,0,2,2,2,1,1,2,0,2,2,0,0,0,1,0,0,0,0,1,0,1,2,2,0,0,1,1,0,2,2,0,2,2,1,1,1,0,2,2,1,2,2,1,2,0,1,2,0,0,2,1,0,2,2,1,1,1,2,2,0,2,1,0,1,0,2,2,1,2,2,1,2,1,0,0,2,0,0,1,0,1,1,0,1,0,0,0,0,0,2,2,0,2,0,1,1,2,2,0,1,1,0,2,1,1,0,2,1,0,2,2,0,0,2,1,1,2,0,0,2,1,2,1,1,2,1,1,1,1,1,1,1,2,1,2,0,2,0,1,0,2,0,1,1,0,0,1,2,0,2,0,0…	AY109646,AF061107	AY109646,AF061107	chr01	97223361	Consistent
727	umc2230	mu	IDP1407	chr01	159	1.2	-	-	MMP	1,0,2,0,1,0,1,2,1,1,2,1,1,1,1,2,2,0,1,1,1,2,2,1,1,1,2,0,1,0,0,1,1,1,1,1,1,1,1,0,1,1,1,2,2,2,2,1,0,1,0,2,0,1,0,0,0,2,0,0,0,1,1,0,0,0,1,0,1,1,0,0,0,1,1,0,2,2,0,2,2,2,1,1,0,2,2,1,2,2,1,2,0,1,2,0,0,2,1,0,2,2,1,0,1,2,2,0,2,1,0,1,0,2,2,1,2,2,1,2,1,2,1,2,0,0,1,2,1,1,0,1,1,0,0,0,0,2,2,0,2,0,1,1,2,2,0,1,1,0,2,1,1,0,2,1,2,1,2,0,0,2,1,1,2,0,0,2,1,2,1,1,2,1,1,1,1,1,1,1,2,1,2,1,2,1,1,1,2,0,1,1,0,0,1,2,0,2,0,0…	BH140311,BG874222	BG874222	chr01	102149017	Consistent
728	TIDP3438	mu	IDP1407	chr01	159	0.7	Co-Dominant	TGCE	ISU Map7	1,0,0,0,1,0,1,2,0,2,0,1,0,1,1,2,2,0,0,1,1,2,2,1,0,1,2,2,1,2,2,1,1,1,0,0,1,1,0,0,1,0,1,2,0,2,2,1,0,1,2,0,1,1,0,1,2,0,1,0,0,1,2,0,0,0,0,0,1,1,1,2,0,2,0,0,0,0,0,0,0,0,0,0,0,0,0,0,0,0,0,0,0,0,0,0,0,0,0,0,0,0,0,0,0,0,0,0,0,0,0,0,0,0,0,0,0,0,0,0,0,0,0,0,0,0,0,0,0,0,0,0,0,0,0,0,0,0,0,0,0,0,0,0,0,0,0,0,0,0,0,0,0,0,0,0,0,0,0,0,0,0,0,0,0,0,0,0,0,0,0,0,0,0,0,0,0,0,0,0,0,0,0,0,0,0,0,0,0,0,0,0,0,0,0,0,0,0,0,0…	MAGIv3.1_12077	-	-	-	-
729	TIDP3316	mu	IDP1407	chr01	159	1	Co-Dominant	TGCE	ISU Map7	1,0,0,0,1,0,1,2,0,1,0,1,0,1,1,2,2,0,0,1,1,2,2,0,0,1,2,2,1,2,1,1,1,1,0,0,1,1,0,0,1,0,1,2,0,2,2,1,0,1,2,0,1,1,0,1,2,0,1,0,0,1,2,0,0,0,0,0,1,1,1,2,0,2,0,0,0,0,0,0,0,0,0,0,0,0,0,0,0,0,0,0,0,0,0,0,0,0,0,0,0,0,0,0,0,0,0,0,0,0,0,0,0,0,0,0,0,0,0,0,0,0,0,0,0,0,0,0,0,0,0,0,0,0,0,0,0,0,0,0,0,0,0,0,0,0,0,0,0,0,0,0,0,0,0,0,0,0,0,0,0,0,0,0,0,0,0,0,0,0,0,0,0,0,0,0,0,0,0,0,0,0,0,0,0,0,0,0,0,0,0,0,0,0,0,0,0,0,0,0…	BM334583	BM334583	chr01	107114683	Consistent
730	IDP4065	mu	IDP1407	chr01	159	2.3	Dominant	+/-	ISU Map7	1,0,0,0,1,0,1,2,0,2,0,1,0,1,1,2,2,0,0,1,1,2,2,1,0,1,2,2,1,2,1,1,1,1,0,0,1,1,0,0,1,0,1,2,0,2,2,1,0,1,2,0,1,1,0,1,2,0,1,0,0,1,2,0,0,0,0,0,1,1,1,2,0,1,0,0,0,0,0,0,0,0,0,0,0,0,0,0,0,0,0,0,0,0,0,0,0,0,0,0,0,0,0,0,0,0,0,0,0,0,0,0,0,0,0,0,0,0,0,0,0,0,0,0,0,0,0,0,0,0,0,0,0,0,0,0,0,0,0,0,0,0,0,0,0,0,0,0,0,0,0,0,0,0,0,0,0,0,0,0,0,0,0,0,0,0,0,0,0,0,0,0,0,0,0,0,0,0,0,0,0,0,0,0,0,0,0,0,0,0,0,0,0,0,0,0,0,0,0,0…	MAGIv3.1_70938	MAGIv3.1_70938	chr01	114141335	Consistent
731	IDP2576b	mu	IDP1407	chr01	159	0	Co-Dominant	Size	ISU Map7	1,0,0,0,1,0,1,2,0,2,0,1,0,1,1,2,2,0,0,1,1,2,2,1,0,1,2,2,1,2,1,1,1,1,0,0,1,1,0,0,1,0,1,2,0,2,2,1,0,1,2,0,1,1,0,1,2,0,1,0,0,1,2,0,0,0,0,0,1,1,1,2,0,1,0,0,0,0,0,0,0,0,0,0,0,0,0,0,0,0,0,0,0,0,0,0,0,0,0,0,0,0,0,0,0,0,0,0,0,0,0,0,0,0,0,0,0,0,0,0,0,0,0,0,0,0,0,0,0,0,0,0,0,0,0,0,0,0,0,0,0,0,0,0,0,0,0,0,0,0,0,0,0,0,0,0,0,0,0,0,0,0,0,0,0,0,0,0,0,0,0,0,0,0,0,0,0,0,0,0,0,0,0,0,0,0,0,0,0,0,0,0,0,0,0,0,0,0,0,0…	MEC_1464_P95-Mar06	MEC_1464_P95-Mar06	chr01	118875548	Consistent
732	TIDP5208	mu	IDP1407	chr01	159	0	Co-Dominant	TGCE	ISU Map7	1,0,0,0,1,0,1,2,0,2,0,1,0,1,1,2,2,0,0,1,1,2,2,1,0,1,0,2,1,2,1,1,0,1,0,0,1,1,0,0,1,0,1,2,0,2,2,1,0,1,2,0,1,1,0,1,2,0,1,0,0,1,2,0,0,0,0,0,1,1,1,2,0,1,0,0,0,0,0,0,0,0,0,0,0,0,0,0,0,0,0,0,0,0,0,0,0,0,0,0,0,0,0,0,0,0,0,0,0,0,0,0,0,0,0,0,0,0,0,0,0,0,0,0,0,0,0,0,0,0,0,0,0,0,0,0,0,0,0,0,0,0,0,0,0,0,0,0,0,0,0,0,0,0,0,0,0,0,0,0,0,0,0,0,0,0,0,0,0,0,0,0,0,0,0,0,0,0,0,0,0,0,0,0,0,0,0,0,0,0,0,0,0,0,0,0,0,0,0,0…	MAGIv3.1_102759	MAGIv3.1_102759	chr01	139840790	Consistent
733	umc1461	mu	IDP1407	chr01	159	0	-	-	MMP	1,0,2,0,1,0,1,2,1,2,2,1,1,1,1,2,2,2,1,1,1,2,0,1,1,1,2,2,1,2,1,1,1,1,1,1,1,1,1,2,1,1,1,2,2,2,2,1,0,1,2,2,1,1,2,1,2,2,1,0,0,1,2,2,0,0,1,0,1,1,0,0,0,1,1,2,1,2,0,2,1,0,1,1,2,2,2,1,2,2,1,2,0,1,2,0,0,2,1,0,2,2,1,1,1,2,2,0,2,1,1,1,0,2,2,1,2,2,1,2,1,2,1,2,0,1,1,2,1,1,0,1,1,1,1,0,1,2,2,0,2,0,1,1,2,2,0,1,1,0,2,1,1,0,2,1,2,1,2,2,0,1,1,1,2,2,0,2,1,2,1,1,2,1,1,1,1,1,1,1,2,1,2,1,2,0,1,1,1,0,1,1,1,2,1,2,0,2,1,2…	CC757151,CC749774,CC758319,AY104209,CC758320,AI600962,CC757033,CC783480,CC757032,AI649666	CC749774	chr01	121034373	Consistent
734	umc1493	mu	IDP1407	chr01	159	0	-	-	MMP	1,0,2,0,1,0,1,2,1,2,2,1,1,1,1,2,2,2,1,1,1,2,2,1,1,1,2,2,1,2,1,1,1,1,1,1,1,1,1,2,1,1,1,2,2,2,2,1,0,1,2,2,1,1,2,1,2,2,1,0,0,1,2,2,0,0,1,0,1,1,0,0,0,1,1,2,1,2,0,2,1,2,1,1,2,2,2,1,2,2,1,2,0,1,2,0,0,2,1,0,2,2,1,1,1,2,2,0,2,1,1,1,0,2,2,1,2,2,1,2,1,2,1,2,2,0,1,2,1,1,0,1,1,1,1,0,1,2,2,0,2,0,1,1,2,2,0,1,1,0,2,1,0,0,2,1,2,1,2,0,0,1,1,1,2,2,0,2,1,2,1,1,2,1,1,1,1,1,1,1,2,1,2,1,2,1,1,1,1,0,1,1,1,2,1,2,0,2,1,0…	BG268310,AW231368,AW257877	-	-	-	-
735	gnp_QCH5a06b	mu	IDP1407	chr01	159	1.9	-	-	Genoplante Map	0,0,0,0,0,0,1,2,0,2,0,1,0,1,1,2,2,0,0,1,1,2,2,1,0,1,2,2,1,2,1,1,1,1,0,0,1,0,0,0,0,0,1,2,0,0,2,1,0,1,2,0,0,2,0,1,2,0,0,0,0,1,2,0,0,0,0,0,1,1,0,1,0,0,0,0,0,0,0,0,0,0,0,0,0,0,0,0,0,0,0,0,0,0,0,0,0,0,0,0,0,0,0,0,0,0,0,0,0,0,0,0,0,0,0,0,0,0,0,0,0,0,0,0,0,0,0,0,0,0,0,0,0,0,0,0,0,0,0,0,0,0,0,0,0,0,0,0,0,0,0,0,0,0,0,0,0,0,0,0,0,0,0,0,0,0,0,0,0,0,0,0,0,0,0,0,0,0,0,0,0,0,0,0,0,0,0,0,0,0,0,0,0,0,0,0,0,0,0,0…	CX129562	-	-	-	-
736	IDP302	mu	IDP1407	chr01	159	0.4	Dominant	-/+	ISU Map7	1,0,0,0,1,0,1,2,0,2,0,1,0,1,1,2,2,0,0,1,1,2,2,1,0,1,2,2,1,2,1,1,1,1,0,0,1,1,0,0,1,0,1,2,0,2,2,1,0,1,2,0,1,1,0,1,2,0,1,0,0,1,2,0,0,0,0,0,1,1,2,1,0,1,0,0,0,0,0,0,0,0,0,0,0,0,0,0,0,0,0,0,0,0,0,0,0,0,0,0,0,0,0,0,0,0,0,0,0,0,0,0,0,0,0,0,0,0,0,0,0,0,0,0,0,0,0,0,0,0,0,0,0,0,0,0,0,0,0,0,0,0,0,0,0,0,0,0,0,0,0,0,0,0,0,0,0,0,0,0,0,0,0,0,0,0,0,0,0,0,0,0,0,0,0,0,0,0,0,0,0,0,0,0,0,0,0,0,0,0,0,0,0,0,0,0,0,0,0,0…	MEC_35629_P95-Mar06	MEC_35629_P95-Mar06	chr01	183653177	Inconsistent
737	csu1138	sk	-	chr01	161.1	0	-	-	MMP	1,0,2,0,1,0,1,2,1,2,2,1,1,1,1,2,2,0,1,1,1,2,2,1,1,1,2,2,1,2,1,1,1,1,1,1,1,1,1,2,1,1,1,2,2,2,2,1,0,1,2,2,1,1,2,1,2,2,1,0,0,1,2,2,0,0,1,0,1,1,2,2,0,1,1,2,1,2,0,2,1,2,1,1,2,2,2,1,2,2,1,2,0,1,2,0,0,2,1,0,2,2,1,1,1,2,2,0,2,1,0,1,0,0,2,1,2,2,1,2,1,2,1,2,1,1,1,2,1,1,0,1,1,1,1,0,1,2,2,0,2,0,1,1,2,2,0,1,1,0,2,1,1,0,2,1,2,1,2,0,0,1,1,1,2,2,0,2,1,2,1,1,2,1,1,1,1,1,1,1,2,1,2,1,2,1,1,1,1,0,1,1,1,2,1,2,0,1,1,2…	AF377564	AF377564	chr01	119018619	Consistent
738	AY109678	mu	csu1138	chr01	161.1	5.3	-	-	MMP	2,0,2,0,1,0,1,2,1,2,2,1,1,1,1,2,2,0,1,1,1,2,2,1,1,1,2,2,1,2,1,1,1,1,1,1,1,1,1,2,1,1,1,2,2,2,2,1,0,1,2,2,1,1,2,0,2,2,1,0,0,0,2,2,0,0,1,0,0,1,2,0,0,1,1,0,1,2,0,2,1,2,1,1,0,2,2,1,2,2,1,2,0,1,2,0,0,2,1,0,2,2,1,1,1,2,2,0,2,1,0,1,0,2,2,2,2,2,1,2,1,2,1,2,0,0,1,2,1,1,0,1,1,0,0,0,0,2,2,0,2,0,1,1,2,2,0,1,1,0,2,1,1,0,2,1,2,1,2,0,0,1,1,1,2,0,0,2,1,2,1,1,2,1,1,1,1,1,1,1,2,1,0,1,2,0,1,1,1,0,1,1,0,0,1,2,0,2,0,0…	BV150651,BV150654,BV150657,AY109678,BV150659,BV150660,CC747237,BV150661,BV150652,BV150650,BV150658,BE639794,AC208719,AW146713,BV150653,AW090950,AW018121,BV150656,BV150655	AY109678,BE639794,AW146713,AW090950,AW018121	chr01	114235393	Consistent
739	gnp_QCN26a09d	mu	csu1138	chr01	161.1	4.1	-	-	Genoplante Map	2,0,0,0,1,0,1,2,0,2,0,2,0,1,1,2,2,0,0,1,1,2,2,1,0,1,2,2,1,2,0,1,0,1,0,0,1,0,0,0,0,0,1,2,0,0,2,1,0,1,2,0,0,0,0,1,2,0,0,0,0,1,2,0,0,0,0,0,1,1,0,2,0,0,0,0,0,0,0,0,0,0,0,0,0,0,0,0,0,0,0,0,0,0,0,0,0,0,0,0,0,0,0,0,0,0,0,0,0,0,0,0,0,0,0,0,0,0,0,0,0,0,0,0,0,0,0,0,0,0,0,0,0,0,0,0,0,0,0,0,0,0,0,0,0,0,0,0,0,0,0,0,0,0,0,0,0,0,0,0,0,0,0,0,0,0,0,0,0,0,0,0,0,0,0,0,0,0,0,0,0,0,0,0,0,0,0,0,0,0,0,0,0,0,0,0,0,0,0,0…	CF054191	CF054191	chr01	268282138	Inconsistent
740	TIDP6143	mu	csu1138	chr01	161.1	3.8	Co-Dominant	TGCE	ISU Map7	1,0,0,0,1,0,1,2,0,2,0,1,0,1,1,2,2,0,0,1,1,2,2,1,0,1,2,2,0,2,1,1,1,1,0,0,1,0,0,0,1,0,1,2,0,2,2,1,0,1,2,0,1,1,0,1,2,0,1,0,0,1,2,0,0,0,0,0,1,1,1,2,0,1,0,0,0,0,0,0,0,0,0,0,0,0,0,0,0,0,0,0,0,0,0,0,0,0,0,0,0,0,0,0,0,0,0,0,0,0,0,0,0,0,0,0,0,0,0,0,0,0,0,0,0,0,0,0,0,0,0,0,0,0,0,0,0,0,0,0,0,0,0,0,0,0,0,0,0,0,0,0,0,0,0,0,0,0,0,0,0,0,0,0,0,0,0,0,0,0,0,0,0,0,0,0,0,0,0,0,0,0,0,0,0,0,0,0,0,0,0,0,0,0,0,0,0,0,0,0…	MAGIv3.1_17937	MAGIv3.1_17937	chr01	144773557	Consistent
741	AY110396	mu	csu1138	chr01	161.1	4.7	-	-	MMP	1,0,2,0,1,0,1,2,1,2,0,1,1,1,1,1,2,2,1,1,1,2,2,1,2,1,2,2,1,2,1,1,1,1,1,1,2,1,1,2,1,1,1,2,2,2,1,1,0,1,2,2,1,1,2,1,2,2,0,0,0,1,2,2,0,0,1,0,1,1,2,2,0,1,1,1,1,2,0,2,0,1,1,2,0,2,2,1,2,2,0,0,0,1,2,0,0,2,1,0,2,2,1,1,1,2,2,0,2,1,0,1,0,1,2,1,2,2,1,2,1,1,1,2,0,0,1,2,1,1,0,1,1,0,0,0,0,2,2,2,2,0,1,1,2,1,0,1,1,0,2,1,1,0,2,1,2,1,2,1,0,1,1,1,2,0,0,2,1,2,1,1,2,1,1,1,1,1,1,1,2,1,2,1,2,1,1,1,1,0,1,1,0,0,1,2,0,2,0,2…	CC756566,BE453840,BV150762,BV150758,CC149311,BV150757,BV150763,BV150756,CC738594,BV150760,BV150759,BV150761,AY110396,BE475664,BV150755,CC756567	BE453840,AY110396,BE475664	chr01	146904136	Consistent
742	umc1906	sk	-	chr01	164.2	0	-	-	MMP	1,0,2,0,1,0,1,2,1,2,2,1,1,1,1,2,2,2,0,1,1,2,2,1,1,1,1,2,1,2,1,1,1,1,1,1,2,1,1,2,1,1,1,1,2,2,2,1,0,1,2,2,1,1,2,1,2,2,1,0,0,1,1,0,0,0,1,0,1,1,0,0,0,1,2,1,1,2,0,2,1,2,0,0,0,0,0,0,0,0,0,0,0,1,2,0,0,2,1,0,1,2,1,1,2,2,2,0,1,1,2,1,0,1,2,1,2,2,1,2,1,2,1,2,2,1,1,2,1,1,0,1,1,1,1,0,1,2,2,0,2,0,1,1,2,1,0,2,1,0,2,1,1,0,2,1,2,1,2,0,0,1,1,1,0,2,0,1,1,2,1,1,2,1,1,1,1,1,1,1,2,1,2,1,2,0,1,0,0,0,0,1,1,2,1,2,0,2,0,2…	G68068	G68068	chr01	162443211	Consistent
743	MAGI_106177	mu	umc1906	chr01	164.2	2.5	-	SNP	ISU SNP Map	1,2,0,1,1,2,1,2,0,2,0,1,1,1,1,0,2,0,0,1,1,2,2,1,1,1,1,2,1,2,1,1,1,1,0,0,2,1,0,0,1,1,1,1,2,2,2,1,2,1,2,2,1,1,2,1,2,0,0,1,1,1,1,0,2,1,0,0,0,1,1,1,1,1,2,1,0,2,1,2,1,0,1,1,2,2,2,1,2,2,2,1,2,0,2,1,1,2,1,1,1,2,0,1,2,2,2,1,1,0,2,1,2,1,2,1,2,2,0,2,0,2,1,2,0,0,1,1,1,1,2,1,0,1,0,2,1,2,2,0,2,1,1,1,0,1,2,2,1,0,2,0,1,1,2,1,2,0,0,0,1,1,0,1,1,2,2,1,1,0,0,0,2,0,1,1,1,0,1,1,2,1,2,0,2,2,0,2,0,1,1,1,1,2,1,2,1,2,0,2…	MAGIv3.1_106177	MAGIv3.1_106177	chr01	162864873	Consistent
744	gnp_QAZ4e04c	mu	umc1906	chr01	164.2	2	-	-	Genoplante Map	1,0,0,0,1,0,1,2,0,2,0,1,0,1,1,2,2,0,0,1,1,2,2,1,0,1,2,2,1,2,1,1,1,1,0,0,1,0,0,0,0,0,1,1,0,0,0,1,0,1,2,0,0,1,0,1,2,0,0,0,0,1,1,0,0,0,0,0,1,1,0,1,0,0,0,0,0,0,0,0,0,0,0,0,0,0,0,0,0,0,0,0,0,0,0,0,0,0,0,0,0,0,0,0,0,0,0,0,0,0,0,0,0,0,0,0,0,0,0,0,0,0,0,0,0,0,0,0,0,0,0,0,0,0,0,0,0,0,0,0,0,0,0,0,0,0,0,0,0,0,0,0,0,0,0,0,0,0,0,0,0,0,0,0,0,0,0,0,0,0,0,0,0,0,0,0,0,0,0,0,0,0,0,0,0,0,0,0,0,0,0,0,0,0,0,0,0,0,0,0…	CD991126	CD991126	chr08	14445618	Inconsistent
745	umc1903	sk	-	chr01	164.8	0	-	-	MMP	1,0,2,0,1,0,1,2,1,2,2,1,1,1,1,2,2,2,2,1,1,2,2,1,1,1,1,2,1,2,1,1,1,1,1,1,2,1,1,2,1,1,1,1,2,2,2,1,0,1,2,2,1,1,2,1,2,2,1,0,0,1,1,2,0,0,1,0,1,1,1,1,0,1,2,1,1,2,0,2,1,2,1,1,2,2,2,1,2,2,2,1,0,1,2,0,0,2,1,0,1,2,1,1,2,2,2,0,1,1,2,1,0,1,2,1,2,2,1,2,1,2,1,2,1,1,1,2,1,1,0,1,1,1,1,0,1,2,2,1,2,0,1,1,2,1,0,2,1,0,2,1,1,0,2,1,2,1,2,1,0,1,1,1,1,2,0,1,1,2,1,1,2,1,1,1,0,1,1,0,2,1,2,1,2,1,1,2,1,0,1,1,1,2,1,2,0,2,1,0…	-	-	-	-	-
746	umc2232	mu	umc1903	chr01	164.8	0.5	-	-	MMP	1,0,2,0,1,0,1,2,1,2,2,1,1,1,1,2,2,2,2,1,1,2,2,1,0,1,1,2,1,0,0,1,1,1,1,1,2,1,1,2,1,1,1,1,0,2,2,1,0,1,0,2,0,1,0,0,0,2,0,0,0,1,1,2,0,0,1,0,1,1,1,1,0,1,2,1,1,2,0,2,1,2,1,1,0,2,2,1,2,2,2,1,0,1,2,0,0,2,1,0,1,2,1,1,2,2,2,0,1,1,0,1,0,1,2,1,1,2,1,2,1,2,1,2,0,0,1,2,1,0,0,0,1,0,0,0,0,2,2,1,2,0,1,1,2,1,0,2,1,0,1,1,1,0,2,1,2,1,2,0,0,1,1,0,0,0,0,1,1,2,1,1,2,1,1,1,1,1,1,1,2,1,2,1,2,1,1,2,1,0,1,0,0,0,1,2,0,2,0,2…	BG517320	BG517320	chr01	164374734	Consistent
747	umc1395	mu	umc1903	chr01	164.8	0.4	-	-	MMP	1,0,2,0,1,0,1,2,1,2,2,1,1,1,1,2,2,2,2,1,1,2,2,1,1,1,1,2,1,2,1,1,1,1,1,1,2,1,1,2,1,1,1,1,2,2,2,1,0,1,2,2,1,1,2,1,2,2,1,0,0,1,1,2,0,0,1,0,1,1,1,1,0,1,2,1,1,2,0,2,1,2,1,1,2,2,2,1,2,2,2,1,0,1,2,0,0,2,1,0,1,2,1,1,2,2,2,0,1,1,1,1,0,2,2,1,2,2,1,2,1,2,1,2,0,1,1,2,1,1,0,1,1,1,1,0,1,2,2,1,2,0,1,1,2,1,0,2,1,0,2,1,1,0,2,1,2,1,2,2,0,0,1,1,0,2,0,1,1,2,1,1,2,1,1,1,1,1,1,1,2,0,2,1,2,1,1,2,1,0,1,1,1,2,1,2,0,2,2,2…	AI820147,CC785251,AI812184,CC785250	CC785250	chr01	164392534	Consistent
748	TIDP3361	mu	umc1903	chr01	164.8	0	Co-Dominant	TGCE	ISU Map7	1,0,0,0,1,0,1,2,0,2,0,1,0,1,1,2,2,0,0,1,1,2,2,1,0,1,1,2,1,2,1,1,1,1,0,0,2,1,0,0,1,0,1,1,0,2,2,1,0,1,2,0,1,1,0,1,2,0,1,0,0,1,1,0,0,0,0,0,1,1,1,1,0,1,0,0,0,0,0,0,0,0,0,0,0,0,0,0,0,0,0,0,0,0,0,0,0,0,0,0,0,0,0,0,0,0,0,0,0,0,0,0,0,0,0,0,0,0,0,0,0,0,0,0,0,0,0,0,0,0,0,0,0,0,0,0,0,0,0,0,0,0,0,0,0,0,0,0,0,0,0,0,0,0,0,0,0,0,0,0,0,0,0,0,0,0,0,0,0,0,0,0,0,0,0,0,0,0,0,0,0,0,0,0,0,0,0,0,0,0,0,0,0,0,0,0,0,0,0,0…	MAGIv3.1_75799	MAGIv3.1_75799	chr01	164374359	Consistent
749	gnp_QCL5c12a	mu	umc1903	chr01	164.8	0.5	-	-	Genoplante Map	1,0,0,0,1,0,1,2,0,2,0,1,0,1,1,1,2,0,0,1,1,2,2,1,0,1,1,0,1,2,1,1,1,1,0,0,2,0,0,0,0,0,1,1,0,0,2,1,0,1,2,0,0,1,0,1,2,0,0,0,0,1,1,0,0,0,0,0,1,1,0,1,0,0,0,0,0,0,0,0,0,0,0,0,0,0,0,0,0,0,0,0,0,0,0,0,0,0,0,0,0,0,0,0,0,0,0,0,0,0,0,0,0,0,0,0,0,0,0,0,0,0,0,0,0,0,0,0,0,0,0,0,0,0,0,0,0,0,0,0,0,0,0,0,0,0,0,0,0,0,0,0,0,0,0,0,0,0,0,0,0,0,0,0,0,0,0,0,0,0,0,0,0,0,0,0,0,0,0,0,0,0,0,0,0,0,0,0,0,0,0,0,0,0,0,0,0,0,0,0…	CF049929	-	-	-	-
750	AI855190	mu	umc1903	chr01	164.8	0.8	-	-	MMP	1,0,2,0,1,0,1,2,1,2,1,1,1,1,1,0,2,2,2,0,0,2,2,1,1,1,1,2,1,2,1,1,1,1,1,1,2,1,1,2,1,1,1,1,2,2,2,1,0,1,0,2,1,1,2,0,2,2,1,0,0,1,1,0,0,0,1,0,1,1,1,1,0,1,2,1,1,2,0,2,1,2,1,1,0,2,2,1,2,2,2,1,0,1,2,0,0,2,1,0,1,2,1,1,2,2,2,0,1,0,0,1,0,1,2,1,2,2,2,2,0,2,0,2,0,0,1,2,1,1,0,1,1,0,0,0,0,2,2,1,2,0,1,1,2,1,0,2,1,0,2,1,1,0,2,1,2,1,2,0,0,1,1,1,2,0,0,1,1,0,1,1,2,1,1,1,1,1,1,1,2,1,2,1,2,1,1,1,1,0,1,1,0,0,1,2,0,2,0,2…	BV148410,BV148408,BV148402,BV148399,BV148404,CC752825,AI855190,BV148400,BV148405,BV148409,BV148407,BV148401,BV148403,AC197915,CC752826,BV148406,AC206254	AI855190	chr01	163947359	Consistent
751	TIDP5475	mu	umc1903	chr01	164.8	0.7	Co-Dominant	TGCE	ISU Map7	0,0,0,0,1,0,1,2,0,2,0,1,0,1,1,2,2,0,0,1,1,2,2,1,0,1,1,2,1,2,1,1,1,1,0,0,2,1,0,0,1,0,1,1,0,2,2,1,0,1,2,0,1,1,0,1,2,0,1,0,0,1,1,0,0,0,0,0,1,1,1,1,0,1,0,0,0,0,0,0,0,0,0,0,0,0,0,0,0,0,0,0,0,0,0,0,0,0,0,0,0,0,0,0,0,0,0,0,0,0,0,0,0,0,0,0,0,0,0,0,0,0,0,0,0,0,0,0,0,0,0,0,0,0,0,0,0,0,0,0,0,0,0,0,0,0,0,0,0,0,0,0,0,0,0,0,0,0,0,0,0,0,0,0,0,0,0,0,0,0,0,0,0,0,0,0,0,0,0,0,0,0,0,0,0,0,0,0,0,0,0,0,0,0,0,0,0,0,0,0…	MAGIv3.1_69681	MAGIv3.1_69681	chr01	162275210	Consistent
752	mmp124	mu	umc1903	chr01	164.8	0	-	-	MMP	1,0,2,0,1,0,1,2,1,2,2,1,0,1,1,2,2,2,2,0,1,2,2,1,1,1,1,2,1,0,0,1,1,1,1,1,2,1,1,2,1,0,1,1,0,2,2,1,0,1,0,2,0,1,0,0,0,2,0,0,0,1,1,2,0,0,1,0,1,1,1,1,0,1,2,1,1,2,0,2,0,2,1,1,2,0,2,1,2,2,2,1,0,1,2,0,0,2,1,0,1,2,1,0,2,2,2,0,1,1,0,0,0,1,2,1,2,0,1,0,1,2,1,2,0,1,1,2,1,1,0,1,1,1,1,0,1,2,2,0,2,0,1,1,2,1,0,2,1,0,2,1,1,0,2,1,2,1,2,0,0,1,1,0,0,2,0,1,1,2,1,1,2,1,1,1,1,1,1,1,2,1,2,1,2,0,1,2,1,0,1,1,1,2,1,2,0,2,0,2…	AZ916319	AZ916319	chr04	172386575	Inconsistent
753	IDP4824	mu	umc1903	chr01	164.8	1.2	Dominant	+/-	ISU Map7	1,2,2,1,1,2,1,2,0,2,2,1,1,1,1,1,2,0,0,1,1,2,2,1,1,1,1,2,1,2,1,1,1,1,0,0,2,1,0,2,1,1,1,1,2,2,2,1,2,1,2,2,1,1,2,1,2,0,0,2,1,1,1,0,2,1,1,1,0,1,1,1,1,1,2,1,0,2,1,2,1,0,1,1,2,2,2,1,2,2,2,1,2,1,2,1,1,2,1,1,1,2,0,2,2,2,2,1,1,0,2,1,2,2,2,1,2,2,0,2,1,2,1,2,0,0,1,1,1,1,2,1,0,1,0,2,1,2,2,0,2,1,1,1,1,1,2,2,1,2,2,0,1,1,2,1,2,0,2,2,2,1,0,2,1,2,2,1,1,0,0,0,2,0,1,1,1,0,1,1,2,1,1,1,2,2,2,2,0,2,1,1,1,2,1,2,1,2,2,2…	MAGIv3.1_27251	-	-	-	-
754	MAGI_13112	mu	umc1903	chr01	164.8	1	-	SNP	ISU SNP Map	1,2,0,1,1,2,1,2,0,2,0,1,1,1,1,0,2,0,0,1,1,2,2,1,1,1,1,2,1,2,1,1,1,1,0,0,2,1,0,0,1,1,1,1,2,2,2,1,2,1,2,2,1,1,2,1,2,0,0,2,1,1,1,0,2,1,0,0,0,1,1,1,1,1,2,1,0,2,1,2,1,0,1,1,2,2,2,1,2,2,2,1,2,0,2,1,1,2,1,1,1,2,0,1,2,2,2,1,1,0,2,1,2,2,2,1,2,2,0,2,0,2,1,2,0,0,1,1,1,1,1,1,0,1,0,2,1,2,2,0,2,1,1,1,0,1,2,2,1,0,2,0,1,1,2,1,2,0,0,0,2,1,0,2,1,2,2,1,1,0,0,0,2,0,1,1,1,0,1,1,2,1,2,0,2,2,0,2,0,1,1,1,1,2,1,2,1,2,2,2…	MAGIv3.1_13112	MAGIv3.1_13112	chr01	161273270	Consistent
755	MAGI_75799	mu	umc1903	chr01	164.8	0.6	-	SNP	ISU SNP Map	1,2,0,1,1,2,1,2,0,2,2,1,1,1,1,0,2,0,0,1,1,2,2,1,1,1,1,2,1,2,1,1,1,1,0,0,2,1,0,0,1,1,1,1,2,2,2,1,2,1,2,2,1,1,2,1,2,0,0,1,1,1,1,0,2,1,1,0,0,1,1,1,1,1,2,1,0,2,1,2,1,0,1,1,2,2,2,1,2,2,2,1,2,1,2,1,1,2,1,1,1,2,0,1,2,2,2,1,1,0,1,1,2,2,2,1,2,2,0,2,1,2,1,2,0,0,1,1,1,1,2,1,0,1,0,2,1,2,2,0,2,1,1,1,0,1,2,2,1,2,2,0,1,1,2,1,2,0,0,0,1,1,0,1,1,2,2,1,1,0,0,0,2,0,1,1,1,0,1,1,2,1,2,1,2,1,0,2,0,1,1,1,1,2,1,2,1,2,0,2…	MAGIv3.1_75799	MAGIv3.1_75799	chr01	164374359	Consistent
756	IDP4808	mu	umc1903	chr01	164.8	0.7	Dominant	-/+	ISU Map7	1,2,0,1,1,2,1,2,0,2,2,1,1,1,1,1,2,0,0,1,1,2,2,1,1,1,1,2,1,2,1,1,1,1,0,0,2,1,0,2,1,1,1,1,2,2,2,1,1,1,2,2,1,1,2,1,2,0,0,1,1,1,1,0,2,1,1,1,0,1,1,1,1,1,2,1,0,2,1,2,1,0,1,1,2,2,2,1,2,2,2,1,2,1,2,1,1,2,1,1,1,2,0,1,2,2,0,0,0,0,0,0,0,0,0,0,0,0,0,0,0,0,0,0,0,0,0,0,0,0,0,0,0,0,0,0,0,0,0,0,0,0,0,0,0,0,0,0,0,0,0,0,0,0,0,0,0,0,0,0,0,0,0,0,0,0,0,0,0,0,0,0,0,0,0,0,0,0,0,0,0,0,0,0,0,0,0,0,0,0,0,0,0,0,0,0,0,0,0,0…	MAGIv3.1_25712	MAGIv3.1_25712	chr06	22325711	Inconsistent
757	IDP6975	mu	umc1903	chr01	164.8	1.2	Co-Dominant	Size	ISU Map7	1,2,0,1,1,2,1,2,0,2,2,1,1,1,1,1,2,0,0,1,1,2,1,1,1,1,1,2,1,2,1,1,1,1,0,0,2,1,0,2,1,1,1,1,2,1,2,1,1,1,1,2,1,1,2,1,2,0,0,1,1,1,1,0,2,1,1,1,0,1,1,1,1,1,2,1,0,2,1,2,1,0,1,1,2,2,2,1,2,2,2,1,2,1,2,1,1,2,1,1,1,2,0,1,2,2,0,0,0,0,0,0,0,0,0,0,0,0,0,0,0,0,0,0,0,0,0,0,0,0,0,0,0,0,0,0,0,0,0,0,0,0,0,0,0,0,0,0,0,0,0,0,0,0,0,0,0,0,0,0,0,0,0,0,0,0,0,0,0,0,0,0,0,0,0,0,0,0,0,0,0,0,0,0,0,0,0,0,0,0,0,0,0,0,0,0,0,0,0,0…	MAGIv3.1_1227	MAGIv3.1_1227	chr01	164905931	Consistent
758	umc2233	mu	umc1903	chr01	164.8	0.4	-	-	MMP	1,0,2,0,1,0,1,2,1,2,2,1,1,1,1,0,2,2,2,1,1,2,1,1,0,1,1,0,1,0,0,1,1,1,1,1,2,1,1,0,1,1,1,1,0,0,0,1,0,1,0,2,0,1,0,1,0,2,1,0,0,1,1,0,0,0,1,0,1,1,1,1,0,1,2,1,1,2,0,2,1,2,1,1,0,2,2,1,2,2,2,1,0,1,2,0,0,2,1,0,1,2,1,1,2,2,1,0,1,1,0,1,0,1,2,1,2,2,1,2,1,0,1,0,0,0,1,2,1,1,0,1,1,0,0,0,0,2,2,1,2,0,1,1,2,1,0,2,1,0,2,1,1,0,2,1,2,1,2,0,0,1,1,1,1,0,0,1,1,2,1,1,2,1,1,1,1,1,1,1,2,1,2,1,2,1,1,0,1,0,1,1,0,0,1,1,0,2,0,2…	CC790231,CC146941,CC790232,AC205587,CC146940,BI674799	CC146940	chr01	165131496	Consistent
759	IDP653	mu	umc1903	chr01	164.8	0.4	Dominant	+/-	ISU Map7	1,0,0,0,1,0,1,2,0,2,0,1,0,1,1,2,2,0,0,1,1,2,1,1,0,1,1,2,1,2,1,1,1,1,0,0,2,1,0,0,1,0,1,1,0,1,2,1,0,1,2,0,1,1,0,1,2,0,1,0,0,1,1,0,0,0,0,0,1,1,1,1,0,1,0,0,0,0,0,0,0,0,0,0,0,0,0,0,0,0,0,0,0,0,0,0,0,0,0,0,0,0,0,0,0,0,0,0,0,0,0,0,0,0,0,0,0,0,0,0,0,0,0,0,0,0,0,0,0,0,0,0,0,0,0,0,0,0,0,0,0,0,0,0,0,0,0,0,0,0,0,0,0,0,0,0,0,0,0,0,0,0,0,0,0,0,0,0,0,0,0,0,0,0,0,0,0,0,0,0,0,0,0,0,0,0,0,0,0,0,0,0,0,0,0,0,0,0,0,0…	MEC_26465_P95-Mar06	MEC_26465_P95-Mar06	chr01	167822925	Consistent
760	hac101b	mu	umc1903	chr01	164.8	0	-	-	MMP	1,0,0,0,1,0,1,2,0,2,0,1,0,1,1,2,2,0,0,0,1,2,1,1,0,1,1,2,1,2,1,1,1,1,0,0,2,1,0,0,1,1,1,1,0,1,2,1,0,1,2,0,1,1,0,1,2,2,1,0,0,1,1,0,0,0,0,0,1,1,1,1,0,1,0,0,0,0,0,0,0,0,0,0,0,0,0,0,0,0,0,0,0,0,0,0,0,0,0,0,0,0,0,0,0,0,0,0,0,0,0,0,0,0,0,0,0,0,0,0,0,0,0,0,0,0,0,0,0,0,0,0,0,0,0,0,0,0,0,0,0,0,0,0,0,0,0,0,0,0,0,0,0,0,0,0,0,0,0,0,0,0,0,0,0,0,0,0,0,0,0,0,0,0,0,0,0,0,0,0,0,0,0,0,0,0,0,0,0,0,0,0,0,0,0,0,0,0,0,0…	AW066552	AW066552	chr03	110717887	Inconsistent
761	umc1601	mu	umc1903	chr01	164.8	0	-	-	MMP	1,0,2,0,1,0,1,2,1,2,2,1,1,1,1,2,2,2,2,1,1,2,1,1,1,1,1,2,1,2,1,1,1,1,1,1,2,1,1,2,1,1,1,1,2,1,2,1,0,1,2,2,1,1,2,1,2,2,1,0,0,1,1,2,0,0,1,0,1,1,1,1,0,1,2,1,1,2,0,2,1,2,1,1,2,2,2,1,2,2,2,1,0,1,2,0,0,2,1,0,1,2,1,1,2,2,0,0,1,1,2,1,0,2,2,1,2,2,1,2,1,2,1,2,2,1,1,2,1,1,0,1,1,1,1,0,1,2,2,1,2,0,1,0,2,1,0,2,1,0,2,1,1,0,2,1,2,1,2,2,0,1,1,2,0,2,0,1,1,2,1,1,2,1,1,1,1,1,1,1,2,1,2,1,2,1,1,2,1,0,1,1,1,2,1,1,0,2,2,2…	AW091272	AW091272	chr01	166628448	Consistent
762	TIDP5689	sk	-	chr01	166.2	0	Co-Dominant	TGCE	ISU Map7	1,0,0,0,1,0,1,2,0,2,0,0,0,1,1,2,2,0,0,1,1,2,1,1,0,1,1,2,0,2,1,1,1,1,0,0,2,1,0,0,1,0,1,1,0,1,2,1,0,1,0,0,1,1,0,1,2,0,1,0,0,1,1,0,0,0,0,0,1,1,1,1,0,1,0,0,0,0,0,0,0,0,0,0,0,0,0,0,0,0,0,0,0,0,0,0,0,0,0,0,0,0,0,0,0,0,0,0,0,0,0,0,0,0,0,0,0,0,0,0,0,0,0,0,0,0,0,0,0,0,0,0,0,0,0,0,0,0,0,0,0,0,0,0,0,0,0,0,0,0,0,0,0,0,0,0,0,0,0,0,0,0,0,0,0,0,0,0,0,0,0,0,0,0,0,0,0,0,0,0,0,0,0,0,0,0,0,0,0,0,0,0,0,0,0,0,0,0,0,0…	MAGIv3.1_23863	MAGIv3.1_23863	chr01	166820524	Consistent
763	umc1321	sk	-	chr01	166.2	0	-	-	MMP	1,0,2,0,1,0,1,2,1,2,2,1,1,1,1,2,2,0,2,1,1,2,1,1,1,1,1,0,1,2,1,1,1,1,1,1,2,1,1,2,1,1,1,1,2,1,2,1,0,1,2,2,1,1,2,1,2,2,1,0,0,1,1,2,0,0,1,0,1,1,1,1,0,1,2,1,1,2,0,2,1,2,1,1,2,2,2,1,2,2,2,1,0,1,2,0,0,2,1,0,1,2,1,1,2,2,1,0,1,1,2,1,0,0,2,1,2,2,1,2,1,2,1,2,2,1,1,2,1,1,0,1,1,0,1,0,1,2,2,1,2,0,1,1,2,1,0,2,1,0,2,1,1,0,2,1,2,1,2,0,0,1,1,0,0,2,0,1,1,2,1,1,2,1,1,1,1,1,1,1,2,1,2,1,2,1,1,2,1,0,1,1,1,2,1,1,0,2,2,2…	AI901504	-	-	-	-
764	umc1603	mu	umc1321	chr01	166.2	1.2	-	-	MMP	1,0,2,0,1,0,1,2,1,2,2,1,1,1,1,0,2,2,2,1,1,2,1,1,1,1,1,2,1,2,1,1,1,1,1,1,2,1,1,2,1,1,1,1,2,1,2,1,0,1,2,2,1,1,2,1,2,0,1,0,0,1,1,0,0,0,1,0,1,1,2,2,0,1,2,1,1,2,0,2,1,2,1,1,2,2,2,1,2,2,2,1,0,1,2,0,0,2,1,0,1,2,1,1,2,2,1,0,1,1,2,1,0,1,2,1,2,2,1,2,1,2,1,2,1,1,1,2,1,1,0,1,1,1,1,0,1,2,2,1,2,0,1,1,2,1,0,2,1,0,2,1,1,0,2,1,2,1,2,0,0,1,1,1,1,2,0,1,1,2,1,1,2,1,1,1,0,0,1,1,2,1,0,1,2,1,1,0,0,0,0,0,0,2,1,1,0,2,0,2…	CC146941,AW066568,CC790231,CC790232,AC205587,CC146940	CC146940	chr01	165131496	Consistent
765	TIDP6123	mu	umc1321	chr01	166.2	3.8	Co-Dominant	TGCE	ISU Map7	1,0,0,0,1,0,1,2,0,2,0,1,0,1,1,2,2,0,0,1,1,2,1,1,0,1,1,2,1,2,1,1,1,1,0,0,2,1,0,0,1,0,1,1,0,1,0,1,0,1,2,0,1,1,0,1,2,0,1,0,0,1,1,0,0,0,0,0,1,1,1,1,0,1,0,0,0,0,0,0,0,0,0,0,0,0,0,0,0,0,0,0,0,0,0,0,0,0,0,0,0,0,0,0,0,0,0,0,0,0,0,0,0,0,0,0,0,0,0,0,0,0,0,0,0,0,0,0,0,0,0,0,0,0,0,0,0,0,0,0,0,0,0,0,0,0,0,0,0,0,0,0,0,0,0,0,0,0,0,0,0,0,0,0,0,0,0,0,0,0,0,0,0,0,0,0,0,0,0,0,0,0,0,0,0,0,0,0,0,0,0,0,0,0,0,0,0,0,0,0…	MAGIv3.1_63693	MAGIv3.1_63693	chr01	168470736	Consistent
766	IDP7582	mu	umc1321	chr01	166.2	4.8	Dominant	+/-	ISU Map7	1,2,2,1,1,2,1,1,0,2,2,1,1,1,1,1,2,0,0,1,1,2,1,1,1,1,1,2,1,2,1,1,1,1,0,0,2,1,0,2,1,1,2,1,2,1,2,2,2,1,2,2,1,1,2,1,2,0,0,1,1,1,1,0,2,1,1,1,0,1,1,1,1,1,2,1,0,2,2,2,1,0,1,1,2,2,2,1,2,2,2,2,1,2,1,2,1,1,1,1,1,1,0,2,1,2,1,1,1,0,1,1,2,1,2,2,2,2,0,2,1,2,1,2,0,0,1,1,1,1,2,1,0,1,0,2,1,2,2,0,2,1,1,1,1,1,2,2,1,2,2,0,1,1,2,1,2,0,2,2,1,2,0,1,2,2,2,1,2,0,0,0,2,0,2,1,2,0,1,2,1,2,1,2,2,2,2,2,0,1,2,1,1,2,1,1,2,2,1,2…	MAGIv3.1_59190	MAGIv3.1_59190	chr01	170692470	Consistent
767	IDP7351	mu	umc1321	chr01	166.2	0.8	Co-Dominant	Size	ISU Map7	1,2,0,1,1,2,1,1,0,2,2,1,1,1,1,1,2,0,0,1,1,2,1,1,1,1,1,2,1,2,1,1,1,1,0,0,2,1,0,2,1,1,1,1,2,1,2,1,0,1,2,2,1,1,2,1,2,0,0,1,1,1,1,0,2,1,1,1,0,1,1,1,1,1,2,1,0,2,1,2,1,0,1,1,2,2,2,1,2,2,2,1,2,1,2,1,1,1,1,1,1,2,0,1,2,2,1,1,1,0,1,1,2,2,2,1,2,2,0,2,1,2,1,2,0,0,1,1,1,1,2,1,0,1,0,2,1,2,2,0,2,1,1,1,1,1,2,2,1,2,2,0,1,1,2,1,2,0,0,0,2,1,0,2,1,2,2,1,1,0,0,0,2,0,1,1,1,0,1,2,2,1,2,1,2,1,2,2,0,0,1,1,1,2,1,1,1,2,1,2…	MAGIv3.1_67422	MAGIv3.1_67422	chr01	166859205	Consistent
768	IDP4511	mu	umc1321	chr01	166.2	0.4	Dominant	+/-	ISU Map7	1,2,2,1,1,2,1,1,0,2,2,1,1,1,1,1,2,0,0,1,1,2,1,1,1,1,1,2,1,2,1,1,1,1,0,0,2,1,0,2,1,1,1,1,2,1,2,1,1,1,2,2,1,1,2,1,2,0,0,1,1,1,1,0,2,1,1,1,0,1,1,1,1,1,2,1,0,2,1,2,1,0,1,1,2,2,2,1,2,2,2,1,2,1,2,1,1,2,1,1,1,2,0,1,2,2,1,1,1,0,2,1,2,2,2,1,2,1,0,2,1,2,1,2,0,0,1,1,1,1,2,1,0,1,0,2,1,2,2,0,2,1,1,1,1,1,2,2,1,2,2,0,1,1,2,1,2,0,0,0,2,1,0,2,1,2,2,1,1,0,0,0,2,0,1,1,1,0,1,1,2,1,1,1,2,1,2,2,0,1,1,1,1,2,1,1,1,2,1,2…	MAGIv3.1_797	MAGIv3.1_797	chr01	165061817	Consistent
769	gnp_AI612443	mu	umc1321	chr01	166.2	2	-	-	Genoplante Map	1,0,0,0,1,0,1,2,0,2,0,1,0,1,1,1,2,0,0,1,1,0,1,1,0,1,1,2,1,2,1,1,1,1,0,0,2,0,0,0,0,0,1,1,0,0,2,1,0,1,2,0,0,1,0,1,2,0,0,0,0,1,1,0,0,0,0,0,1,1,0,1,0,0,0,0,0,0,0,0,0,0,0,0,0,0,0,0,0,0,0,0,0,0,0,0,0,0,0,0,0,0,0,0,0,0,0,0,0,0,0,0,0,0,0,0,0,0,0,0,0,0,0,0,0,0,0,0,0,0,0,0,0,0,0,0,0,0,0,0,0,0,0,0,0,0,0,0,0,0,0,0,0,0,0,0,0,0,0,0,0,0,0,0,0,0,0,0,0,0,0,0,0,0,0,0,0,0,0,0,0,0,0,0,0,0,0,0,0,0,0,0,0,0,0,0,0,0,0,0…	AI612443	AI612443	chr10	144010593	Inconsistent
770	MAGI_6593	mu	umc1321	chr01	166.2	0	-	SNP	ISU SNP Map	1,2,0,1,1,2,1,2,0,2,2,1,1,1,1,0,2,0,0,1,1,2,1,1,1,1,1,2,1,2,1,1,1,1,0,0,2,1,0,0,1,1,1,1,2,1,2,1,1,1,2,2,1,1,2,1,2,0,0,1,1,1,1,0,2,1,1,0,0,1,1,1,1,1,2,1,0,2,1,2,1,0,1,1,2,2,2,1,2,2,2,1,2,1,0,1,1,2,1,1,1,2,0,1,2,2,1,1,1,0,2,0,0,2,2,1,2,2,0,2,1,2,1,2,0,0,1,1,1,1,2,1,0,1,0,2,1,2,2,0,2,1,1,1,0,1,2,2,1,2,2,0,1,1,2,1,2,0,0,0,2,1,0,2,1,2,2,1,1,0,0,0,2,0,1,1,1,0,1,1,2,1,2,1,2,1,0,2,0,1,1,1,1,2,1,1,1,2,0,2…	MAGIv3.1_6593	MAGIv3.1_6593	chr01	164917465	Consistent
771	lgm2317	mu	umc1321	chr01	166.2	0	-	-	Genoplante Map	0,0,0,0,1,0,1,2,0,2,0,1,0,1,1,1,2,0,0,1,1,2,1,1,0,1,1,2,0,2,1,1,1,1,0,0,2,1,0,0,1,0,1,1,0,1,0,1,0,1,2,0,1,1,0,1,2,0,1,0,0,1,1,0,0,0,0,0,1,1,1,1,0,1,0,0,0,0,0,0,0,0,0,0,0,0,0,0,0,0,0,0,0,0,0,0,0,0,0,0,0,0,0,0,0,0,0,0,0,0,0,0,0,0,0,0,0,0,0,0,0,0,0,0,0,0,0,0,0,0,0,0,0,0,0,0,0,0,0,0,0,0,0,0,0,0,0,0,0,0,0,0,0,0,0,0,0,0,0,0,0,0,0,0,0,0,0,0,0,0,0,0,0,0,0,0,0,0,0,0,0,0,0,0,0,0,0,0,0,0,0,0,0,0,0,0,0,0,0,0…	-	-	-	-	-
772	MAGI_14362	mu	umc1321	chr01	166.2	0	-	SNP	ISU SNP Map	1,2,0,1,1,2,1,2,0,2,2,1,1,1,1,0,2,0,0,1,1,2,1,1,1,1,1,2,1,2,1,1,1,1,0,0,2,1,0,0,1,1,1,1,2,1,2,1,1,1,2,2,1,1,2,1,2,0,0,1,1,1,1,0,2,1,1,0,0,1,1,1,1,1,2,1,0,2,1,2,1,0,1,1,2,2,2,1,2,2,2,1,2,1,2,1,1,2,1,1,1,2,0,1,2,2,1,1,1,0,2,1,2,1,2,1,2,2,0,2,1,2,1,2,0,0,1,1,1,1,2,1,0,0,0,2,1,2,2,0,2,1,1,1,0,1,2,2,1,2,2,0,1,1,2,1,2,0,0,0,1,1,0,1,1,2,2,1,1,0,0,0,2,0,1,1,1,0,1,1,2,1,2,1,2,1,0,2,0,1,1,1,1,2,1,1,1,2,0,2…	MAGIv3.1_14362	MAGIv3.1_14362	chr01	165262854	Consistent
773	IDP6045	mu	umc1321	chr01	166.2	3	Dominant	+/-	ISU Map7	1,1,2,1,1,1,1,1,0,2,2,1,1,1,1,1,2,0,0,1,1,2,1,1,1,1,1,2,1,2,1,1,1,1,0,0,2,1,0,1,1,1,1,1,1,1,2,1,1,1,2,2,1,1,2,1,2,0,0,1,1,1,1,0,1,1,1,1,0,1,1,1,1,1,2,1,0,1,1,2,1,0,1,1,2,1,2,1,2,1,1,1,2,1,2,1,1,1,1,1,1,2,0,1,1,1,1,1,1,0,1,1,1,1,1,1,2,1,0,2,1,1,1,2,0,0,1,1,1,1,2,1,0,1,0,2,1,1,1,0,1,1,1,1,1,1,1,2,1,1,1,0,1,1,2,1,2,0,0,0,2,1,0,2,1,1,2,1,1,0,0,0,2,0,1,1,1,0,1,1,2,1,2,1,2,1,2,1,0,1,1,1,1,2,1,1,1,1,1,2…	MAGIv3.1_110467	-	-	-	-
774	TIDP3199	mu	umc1321	chr01	166.2	1.5	Co-Dominant	TGCE	ISU Map7	1,0,0,0,1,0,1,2,0,2,0,1,0,1,0,2,2,0,0,1,1,2,1,1,0,1,0,2,1,2,1,1,1,1,0,0,2,1,0,0,1,0,1,1,0,1,2,1,0,1,2,0,1,1,0,1,2,0,1,0,0,1,1,0,0,0,0,0,1,1,1,1,0,1,0,0,0,0,0,0,0,0,0,0,0,0,0,0,0,0,0,0,0,0,0,0,0,0,0,0,0,0,0,0,0,0,0,0,0,0,0,0,0,0,0,0,0,0,0,0,0,0,0,0,0,0,0,0,0,0,0,0,0,0,0,0,0,0,0,0,0,0,0,0,0,0,0,0,0,0,0,0,0,0,0,0,0,0,0,0,0,0,0,0,0,0,0,0,0,0,0,0,0,0,0,0,0,0,0,0,0,0,0,0,0,0,0,0,0,0,0,0,0,0,0,0,0,0,0,0…	MEC_45683_P95-Mar06	MEC_45683_P95-Mar06	chr01	170688130	Consistent
775	IDP6593	mu	umc1321	chr01	166.2	1.1	Co-Dominant	Size	ISU Map7	1,2,0,0,1,2,1,2,0,2,2,1,1,1,1,1,2,0,0,1,1,2,1,1,1,1,1,2,1,2,1,1,1,1,0,0,2,1,0,2,1,1,1,1,2,1,2,1,1,1,2,2,1,1,2,1,2,0,0,1,1,1,1,0,2,1,1,1,0,1,1,1,1,1,2,1,0,2,2,2,1,0,1,1,2,2,2,1,2,2,2,1,2,1,2,1,1,1,1,1,1,2,0,1,2,2,1,1,1,0,1,1,2,1,2,1,2,2,0,2,1,2,1,2,0,0,1,1,1,1,2,1,0,1,0,2,1,2,2,0,2,1,1,2,1,2,2,1,2,2,1,0,1,2,1,2,0,0,0,0,1,1,0,1,1,2,2,1,1,0,0,0,2,0,1,1,1,0,1,1,2,1,1,1,2,1,2,2,0,1,1,1,1,2,1,1,1,2,2,2…	MAGIv3.1_59191	MAGIv3.1_59191	chr01	170691211	Consistent
776	IDP386	sk	-	chr01	166.6	0	Dominant	-/+	ISU Map7	1,0,0,0,1,0,1,2,0,2,0,1,0,1,1,2,2,0,0,1,1,2,1,1,0,1,1,2,1,2,1,1,1,1,0,0,2,1,0,0,1,0,1,1,0,1,2,1,0,1,2,0,1,1,0,1,2,0,1,0,0,1,1,0,0,0,0,0,0,1,1,1,0,1,0,0,0,0,0,0,0,0,0,0,0,0,0,0,0,0,0,0,0,0,0,0,0,0,0,0,0,0,0,0,0,0,0,0,0,0,0,0,0,0,0,0,0,0,0,0,0,0,0,0,0,0,0,0,0,0,0,0,0,0,0,0,0,0,0,0,0,0,0,0,0,0,0,0,0,0,0,0,0,0,0,0,0,0,0,0,0,0,0,0,0,0,0,0,0,0,0,0,0,0,0,0,0,0,0,0,0,0,0,0,0,0,0,0,0,0,0,0,0,0,0,0,0,0,0,0…	AW066606	-	-	-	-
777	TIDP6350	mu	IDP386	chr01	166.6	0.4	Co-Dominant	TGCE	ISU Map7	1,0,0,0,0,0,1,2,0,2,0,1,0,1,1,2,2,0,0,1,1,2,1,1,0,0,1,2,1,2,1,1,1,1,0,0,2,1,0,0,1,0,1,1,0,1,2,1,0,1,2,0,1,1,0,1,2,0,1,0,0,1,1,0,0,0,0,0,1,1,1,1,0,1,0,0,0,0,0,0,0,0,0,0,0,0,0,0,0,0,0,0,0,0,0,0,0,0,0,0,0,0,0,0,0,0,0,0,0,0,0,0,0,0,0,0,0,0,0,0,0,0,0,0,0,0,0,0,0,0,0,0,0,0,0,0,0,0,0,0,0,0,0,0,0,0,0,0,0,0,0,0,0,0,0,0,0,0,0,0,0,0,0,0,0,0,0,0,0,0,0,0,0,0,0,0,0,0,0,0,0,0,0,0,0,0,0,0,0,0,0,0,0,0,0,0,0,0,0,0…	MAGIv3.1_97716	MAGIv3.1_97716	chr01	168565504	Consistent
778	mmp95	mu	IDP386	chr01	166.6	1.3	-	-	MMP	1,0,2,0,1,0,1,2,0,2,2,1,0,1,1,2,2,2,2,1,1,2,1,1,0,1,1,2,1,0,0,1,1,1,1,1,2,1,1,2,1,1,1,1,0,0,2,1,0,1,1,2,0,1,2,1,2,2,1,0,0,1,1,2,0,0,1,0,0,1,1,1,0,1,2,1,1,2,0,2,1,2,1,1,2,0,2,1,2,2,2,1,0,1,2,0,0,0,1,0,1,2,1,0,0,2,1,0,1,1,0,0,0,0,0,1,0,0,0,2,1,0,0,0,0,0,1,2,1,1,0,1,1,1,1,0,1,2,2,1,2,0,1,1,2,1,0,2,1,0,2,1,1,0,2,1,2,1,2,0,0,1,1,1,0,2,0,1,1,2,1,1,2,1,1,1,1,1,1,1,2,1,1,1,2,1,1,2,1,0,1,1,1,2,1,1,0,2,0,2…	AZ916511	AZ916511	chr01	170342369	Consistent
[truncated: 9,365 more rows]

## Sheet: Legend
Column Name	Description
Row #	Row identifier
Marker Name	Name of the marker used in this map
Type	Type of marker; sk=skeleton marker, mu=muscle marker; skeleton and muscle marker were defined in Fu et al. Genetics, 2006
[truncated: 18 more rows]
